# Supplementary material for: Values and preferences towards medical cannabis among people living with chronic pain: a mixed-methods systematic review
Source: PubMed Central journal article supplement — BMJ Open. 2021 Sep 7;11(9):e050831. doi: 10.1136/bmjopen-2021-050831 (PMC8451285; doi:10.1136/bmjopen-2021-050831), 2021-09-07
Supplement: bmjopen-2021-050831.draft_revisions.pdf [file bmjopen-2021-050831.draft_revisions.pdf]

# BMJ Open

BMJ Open is committed to open peer review. As part of this commitment we make the peer review history of every article we publish publicly available.

When an article is published we post the peer reviewers' comments and the authors' responses online. We also post the versions of the paper that were used during peer review. These are the versions that the peer review comments apply to.

The versions of the paper that follow are the versions that were submitted during the peer review process. They are not the versions of record or the final published versions. They should not be cited or distributed as the published version of this manuscript.

BMJ Open is an open access journal and the full, final, typeset and author-corrected version of record of the manuscript is available on our site with no access controls, subscription charges or pay-per-view fees (<http://bmjopen.bmj.com>).

If you have any questions on BMJ Open's open peer review process please email [info.bmjopen@bmj.com](mailto:info.bmjopen@bmj.com)

# BMJ Open

## Values and preferences towards medical cannabis among people living with chronic pain: A mixed methods systematic review

|                               |                                                                                                                                                                                                                                                                                                                                                                                                                                                                                                                                                                                                                                                                                                   |
|-------------------------------|---------------------------------------------------------------------------------------------------------------------------------------------------------------------------------------------------------------------------------------------------------------------------------------------------------------------------------------------------------------------------------------------------------------------------------------------------------------------------------------------------------------------------------------------------------------------------------------------------------------------------------------------------------------------------------------------------|
| Journal:                      | <i>BMJ Open</i>                                                                                                                                                                                                                                                                                                                                                                                                                                                                                                                                                                                                                                                                                   |
| Manuscript ID                 | bmjopen-2021-050831                                                                                                                                                                                                                                                                                                                                                                                                                                                                                                                                                                                                                                                                               |
| Article Type:                 | Original research                                                                                                                                                                                                                                                                                                                                                                                                                                                                                                                                                                                                                                                                                 |
| Date Submitted by the Author: | 08-Mar-2021                                                                                                                                                                                                                                                                                                                                                                                                                                                                                                                                                                                                                                                                                       |
| Complete List of Authors:     | Zeng, Linan; West China Second University Hospital, ; McMaster University,<br>Lytvyn, Lyubov; McMaster University<br>Wang , Xiaoqin ; McMaster University<br>Kithulegoda, Natasha; Women's College Hospital<br>Agterberg, Silvana; Yeshiva University<br>Shergill, Yaad; McMaster University<br>Esfahani, Meisam; McMaster University<br>Heen, Anja; Innlandet Hospital Trust, Department of Medicine<br>Agoritsas, Thomas; McMaster University, Department of Clinical Epidemiology and Biostatistics; University Hospitals of Geneva, Division of General Internal Medicine & Division of Epidemiology<br>Guyatt, Gordon; McMaster University,<br>Busse, Jason; McMaster University, Anesthesia |
| Keywords:                     | QUALITATIVE RESEARCH, Pain management < ANAESTHETICS, GENERAL MEDICINE (see Internal Medicine)                                                                                                                                                                                                                                                                                                                                                                                                                                                                                                                                                                                                    |
|                               |                                                                                                                                                                                                                                                                                                                                                                                                                                                                                                                                                                                                                                                                                                   |

SCHOLARONE™  
Manuscripts

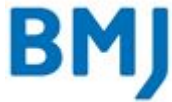

I, the Submitting Author has the right to grant and does grant on behalf of all authors of the Work (as defined in the below author licence), an exclusive licence and/or a non-exclusive licence for contributions from authors who are: i) UK Crown employees; ii) where BMJ has agreed a CC-BY licence shall apply, and/or iii) in accordance with the terms applicable for US Federal Government officers or employees acting as part of their official duties; on a worldwide, perpetual, irrevocable, royalty-free basis to BMJ Publishing Group Ltd ("BMJ") its licensees and where the relevant Journal is co-owned by BMJ to the co-owners of the Journal, to publish the Work in this journal and any other BMJ products and to exploit all rights, as set out in our [licence](#).

The Submitting Author accepts and understands that any supply made under these terms is made by BMJ to the Submitting Author unless you are acting as an employee on behalf of your employer or a postgraduate student of an affiliated institution which is paying any applicable article publishing charge ("APC") for Open Access articles. Where the Submitting Author wishes to make the Work available on an Open Access basis (and intends to pay the relevant APC), the terms of reuse of such Open Access shall be governed by a Creative Commons licence – details of these licences and which [Creative Commons](#) licence will apply to this Work are set out in our licence referred to above.

Other than as permitted in any relevant BMJ Author's Self Archiving Policies, I confirm this Work has not been accepted for publication elsewhere, is not being considered for publication elsewhere and does not duplicate material already published. I confirm all authors consent to publication of this Work and authorise the granting of this licence.

1  
2  
3  
4  
5  
6  
7  
8  
9  
10  
11  
12  
13  
14  
15  
16  
17  
18  
19  
20  
21  
22  
23  
24  
25  
26  
27  
28  
29  
30  
31  
32  
33  
34  
35  
36  
37  
38  
39  
40  
41  
42  
43  
44  
45  
46  
47  
48  
49  
50  
51  
52  
53  
54  
55  
56  
57  
58  
59  
60

## Values and preferences towards medical cannabis among people living with chronic pain: A mixed methods systematic review

Linan Zeng <sup>1,2</sup>, PhD; Lyubov Lytvyn <sup>1</sup>, MSc, PhD; Xiaoqin Wang <sup>3</sup>, PhD; Natasha Kithulegoda <sup>4,5</sup>, MSc; Silvana Agterberg <sup>6</sup>, PhD(c); Yaad Shergill <sup>7</sup>, DC, MSc(c); Meisam Abdar Esfahani <sup>3</sup>, MD, MSc(c); Anja Fog Heen <sup>8</sup>, MD, PhD(c); Thomas Agoritsas <sup>1,9,10</sup>, MD, PhD; Gordon Guyatt <sup>1</sup>, MD, MSc; Jason W. Busse <sup>1,3,11,12,13</sup>, DC, PhD

### Author Affiliations:

1. Department of Health Research Methods, Evidence & Impact, McMaster University, Hamilton, Ontario, Canada
2. Pharmacy Department/Evidence-based Pharmacy Center, West China Second University Hospital, Chengdu, Sichuan, China
3. The Michael G. DeGroot Centre for Medicinal Cannabis Research, McMaster University, Hamilton, Ontario, Canada
4. Institute for Health Policy, Management and Evaluation, University of Toronto, Toronto, Ontario, Canada
5. Women's College Hospital, Toronto, Ontario, Canada
6. Ferkauf Graduate School of Psychology, Yeshiva University, Bronx, New York USA
7. One Elephant Integrative Health Team Inc.
8. Department of Medicine, Lovisenberg Diaconal Hospital, Oslo, Norway
9. Division of General Internal Medicine, Department of Medicine, Geneva University Hospitals, Switzerland
10. Department of Medicine, Faculty of Medicine, University of Geneva, Switzerland
11. Department of Anesthesia, McMaster University, Hamilton, Ontario, Canada
12. The Michael G. DeGroot National Pain Centre, McMaster University, Hamilton, Ontario, Canada
13. Chronic Pain Centre of Excellence for Canadian Veterans, Hamilton, Ontario, Canada

### \*Corresponding Author:

Jason W. Busse, Department of Anesthesia, Michael G. DeGroot School of Medicine, McMaster University, HSC-2V9, 1280 Main St. West, Hamilton, Canada, L8S 4K1  
Email: bussejw@mcmaster.ca

## Abstract

**Objective** To explore values and preferences towards medical cannabis among people living with chronic pain.

**Design** Mixed methods systematic review.

**Data sources** We searched MEDLINE, EMBASE, and PsycInfo from inception to March 17, 2020.

**Study selection** Pairs of reviewers independently screened search results and included quantitative, qualitative and mixed methods studies reporting values and preferences towards medical cannabis among people living with chronic pain.

**Review methods** We analyzed data using meta-narrative synthesis (quantitative findings were qualitized) and tabulated review findings according to identified themes. We used the GRADE approach to assess certainty of evidence.

**Results** Of 1,838 initial records, 15 studies proved eligible for review. High to moderate certainty evidence showed that patient's use of medical cannabis for chronic pain was influenced by both positive (e.g. support from friends and family) and negative social factors (e.g. stigma surrounding cannabis use). Most patients using medical cannabis favored products with balanced ratios of tetrahydrocannabinol (THC) and cannabidiol (CBD), or high levels of CBD, but not high THC preparations. Many valued the effectiveness of medical cannabis for symptom management even when experiencing adverse events related to concentration, memory, or fatigue. Reducing use of prescription medication was a motivating factor for use of medical cannabis, and concerns regarding addiction, losing control or acting strangely were disincentives. Out-of-pocket costs were a barrier, whereas legalization of medical cannabis improved access and incentivized

1  
2  
3 use.  
4  
5

6 Low to very low certainty evidence suggested highly variable values towards  
7  
8 medical cannabis among people living with chronic pain. Individuals with pain  
9  
10 related to life-limiting disease were more willing to use medical cannabis, and  
11  
12 preferred oral over inhaled administration.  
13  
14

15 **Conclusions** Our findings highlight factors that clinicians should consider when  
16  
17 discussing medical cannabis. The variability of patients' values and preferences  
18  
19 emphasize the need for shared decision making when considering medical cannabis  
20  
21 for chronic pain.  
22  
23  
24  
25  
26  
27

28 **Systematic review registration:** The Open Science Framework (OSF)  
29  
30 (<https://osf.io/5d72w>).  
31  
32  
33  
34

35 **Word count: 3126**  
36  
37  
38  
39  
40  
41  
42  
43  
44  
45  
46  
47  
48  
49  
50  
51  
52  
53  
54  
55  
56  
57  
58  
59  
60

### Strengths and limitations of this study

- Consideration of complementary bodies of evidence (qualitative, quantitative and mixed-methods) and use of the GRADE approach to assess the certainty of evidence provide greater confidence in the interpretation of results.
- Most eligible studies are from high-income countries, reflecting values and preferences of patients living in better health care service systems with health insurance coverage. The generalizability of our findings to other populations is uncertain.
- Studies eligible for this review failed to consistently report participants' socio-economic status, educational level, and religious beliefs, limiting exploration of the impact of these characteristics on values and preferences towards medical cannabis for chronic pain.

## INTRODUCTION

Chronic pain is the major cause of non-fatal disease burden worldwide,<sup>1</sup> and is estimated to affect one in five adults in the general global population<sup>2</sup> and one in three in low and middle-income countries.<sup>3</sup> Opioids are commonly prescribed for chronic pain; however, increasing awareness of modest benefits and risks of addiction, overdose and death have generated interest for alternative management strategies. Medical cannabis, whose two most studied active ingredients are delta-9-tetrahydrocannabinol (THC) and cannabidiol (CBD), is one such therapeutic alternative.<sup>4</sup> Moreover, the legalization of medical cannabis among more than 30 countries<sup>5</sup> has increased access for people living with chronic pain who are considering this option. Accordingly, physicians are increasingly faced with questions from patients about the potential role of medical cannabis in managing their pain.<sup>6</sup>

Physicians who seek guidance from current clinical practice guidelines regarding medical cannabis for chronic pain will find recommendations to be inconsistent. As examples, the UK's National Institute for Health and Care Excellence (NICE) recommends against prescribing cannabis-related products for chronic pain, citing its high cost and inadequate supporting evidence.<sup>7</sup> The American Academy of Neurology (ANN) recommends an oral cannabis extract containing both THC and CBD as having the highest level of empirical support as a treatment for chronic pain associated with multiple sclerosis.<sup>8</sup> These guidelines, and others, have neglected to systematically identify and incorporate target patients' values and preferences, which may affect their findings.

Understanding patients' values and preferences, defined as patient-important desirable and undesirable consequences weighed when making a recommendation,<sup>9</sup>



1  
2  
3 can improve the trustworthiness of recommendations. Therefore, we conducted a  
4  
5 systematic review investigating values and preferences towards the use of medical  
6  
7 cannabis among people living with chronic pain. This systematic review is part of the  
8  
9 BMJ Rapid Recommendations project, a collaborative effort from the MAGIC  
10  
11 Evidence Ecosystem Foundation ([www.magicevidence.org](http://www.magicevidence.org)) and the British Medical  
12  
13 Journal. This systematic review informed a parallel guideline published on [bmj.com](http://bmj.com)  
14  
15 and MAGICapp ([please insert link to guideline](#)).<sup>10</sup>  
16  
17  
18  
19  
20  
21  
22  
23  
24  
25  
26  
27  
28  
29  
30  
31  
32  
33  
34  
35  
36  
37  
38  
39  
40  
41  
42  
43  
44  
45  
46  
47  
48  
49  
50  
51  
52  
53  
54  
55  
56  
57  
58  
59  
60

## METHODS

We registered and published our study protocol on the Open Science Framework (OSF) (<https://osf.io/5d72w>) and adhered to the PRISMA (Preferred Reporting Items for Systematic reviews and Meta-Analyses) statement.

### Data source and Searches

We searched MEDLINE, EMBASE, and PsycInfo from inception to March 17, 2020, using a combination of search filters for retrieving studies on values and preferences towards cannabis use among people living with chronic pain (Appendix 1).<sup>11</sup> We reviewed reference lists of all included studies and relevant reviews to identify additional eligible studies.

### Study selection

We included quantitative, qualitative (including survey research that only reported qualitative findings) and mixed-methods studies that reported values and preferences of people living with chronic cancer or non-cancer pain, or their carers, on: 1) relative values or importance of outcomes related to medical cannabis use (e.g. improvements in pain and function, side effects) for chronic pain (defined as pain lasting three months or longer); 2) formulation of medical cannabis (e.g. administration routes, ingestion methods, ratios of THC to CBD); or 3) factors that influence the decision to use medical cannabis. If studies enrolled both acute and chronic pain patients, we considered them eligible if they reported outcomes of chronic pain patients separate from others, or if at least 80% of patients were affected by chronic pain.

1  
2  
3 We excluded studies that: 1) did not elicit data from patients or carers directly  
4  
5 (e.g. data elicited from health providers; information from databases of health  
6  
7 records); 2) only reported health state values or quality of life of people living with  
8  
9 chronic pain, not related to use of medical cannabis; 3) only reported correlation  
10  
11 analyses of associations among demographic variables, other patient characteristics,  
12  
13 and medical cannabis use for chronic pain; 4) case studies with less than 10 patients;  
14  
15 5) studies published in languages other than English, or 6) abstracts and literature  
16  
17 reviews.  
18  
19  
20  
21

22  
23 Before beginning each phase of the review process, we conducted calibration  
24  
25 exercises in which reviewers assessed the same two articles and discussed any  
26  
27 disagreements, leading to clarification and a common understanding of criteria and  
28  
29 process. After calibration, six paired reviewers (LZ & XW, NK & SA, YS & MA)  
30  
31 independently screened titles and abstracts of all retrieved references, and the full  
32  
33 text of articles deemed potentially eligible. We resolved disagreements by discussion  
34  
35 or consultation with an adjudicator (LL).  
36  
37  
38  
39  
40  
41

#### 42 **Data collection and risk of bias assessment**

43  
44 Three pairs of reviewers (LZ & XW, NK & SA, YS & MA) extracted data from eligible  
45  
46 studies, independently and in duplicate, for research questions, population  
47  
48 characteristics, design and methods of data collection, risk of bias or methodological  
49  
50 limitations, and main findings (Appendix 2). For main findings, we selected two  
51  
52 eligible articles per study design, identified key themes addressed in the studies, and  
53  
54 then coded the themes as different categories for main findings in the data  
55  
56 abstraction form (Appendix 2).<sup>12</sup> We resolved disagreements through discussion to  
57  
58  
59  
60

1  
2  
3 reach consensus, or in consultation with an adjudicator (LL).  
4

5 For quantitative studies, we used GRADE (Grading of Recommendations  
6 Assessment, Development and Evaluation) guidance for studies of values and  
7 preferences to assess risk of bias of individual studies (Appendix 3).<sup>13</sup> For qualitative  
8 studies, we used the Critical Appraisal Skills Programme (CASP) checklist to assess  
9 methodological reporting quality of individual studies (Appendix 4).<sup>14</sup>  
10  
11  
12  
13  
14  
15  
16  
17  
18  
19

## 20 **Data synthesis and analysis**

21  
22 Using an iterative process, we compared themes of the categories identified across  
23 all studies and developed analytic themes.<sup>12</sup> We applied critical meta-narrative  
24 synthesis, a modified form of critical interpretive synthesis, to transform quantitative  
25 into qualitative data using systematic profiles and critical questions that are asked to  
26 further extract narratives from the data.<sup>15,16</sup> To facilitate this transformation, we  
27 applied four types of profiles to transform the extracted quantitative data that had  
28 the potential to be qualitized, or converted into narratives (Table 1).<sup>12,16</sup> By using  
29 inductive content analysis we synthesized the qualitized findings to produce review  
30 findings which addressed the key themes.  
31  
32  
33  
34  
35  
36  
37  
38  
39  
40  
41  
42  
43  
44  
45

## 46 **Certainty of Evidence**

47  
48 For review findings from quantitative studies, we assessed the certainty of evidence  
49 according to the five GRADE domains (i.e. risk of bias, imprecision, inconsistency,  
50 indirectness, and small study effects)<sup>13,17,18</sup> For review findings from qualitative  
51 studies, we assessed the certainty of evidence according to the five GRADE-CERQual  
52 (Confidence in the Evidence from Reviews of Qualitative Research) domains (i.e.  
53  
54  
55  
56  
57  
58  
59  
60

1  
2  
3 methodological limitations, relevance, coherence, adequacy and dissemination  
4  
5 bias).<sup>19</sup> We initially considered the certainty of evidence as high, and if serious or  
6  
7 several minor or moderate concerns were detected in one or more domains, we  
8  
9 rated down certainty of evidence by one or more levels to moderate, low or very  
10  
11  
12  
13 low.

### 14 15 16 17 18 **Patient and public involvement**

19  
20 We engaged three people living with chronic pain, one of whom used medical  
21  
22 cannabis, to review our findings and advise if they were consistent with their  
23  
24 experiences. Led by the MAGIC Evidence Ecosystem Foundation, a BMJ RapidRec  
25  
26 panel of clinicians, methodologists and persons with lived experience of chronic pain  
27  
28 were responsible for developing clinical practice recommendations for medical  
29  
30 cannabis and chronic pain. Three patient partners were full members of the  
31  
32 guideline panel and received training and support to optimise contributions  
33  
34 throughout the guideline development process. The panel developed  
35  
36 recommendations using the GRADE framework, available online through the  
37  
38 MAGICapp ([please insert link to guideline](#)),<sup>10</sup> and considered evidence from  
39  
40 systematic reviews on the effectiveness of medical cannabis, adverse events related  
41  
42 to medical cannabis, opioid substitution with medical cannabis, and this review of  
43  
44 patients' values and preferences regarding medical cannabis to manage chronic pain.  
45  
46  
47  
48  
49  
50  
51  
52  
53  
54  
55  
56  
57  
58  
59  
60

## RESULTS

Our search retrieved 1,838 records, of which 102 were deemed potentially eligible based on titles and abstracts. After full text screening, 15 studies (reported in 16 articles) proved eligible for review, including nine quantitative studies, five qualitative studies and one mixed method study (Figure 1, Appendix 5,6) <sup>20-35</sup>

### Study characteristics

Of the 15 studies, nine were conducted in the United States, two in the United Kingdom, two in Israel, one in Canada, and one in Australia. Four studies were conducted between 2000 and 2009, and 11 were conducted between 2010 and 2019. The number of participants ranged from 34 to 1,514 among quantitative studies, 18 to 150 in the qualitative studies, and 984 were enrolled in the mixed method study. All 15 studies included only chronic pain patients; no caregivers were enrolled. (Appendix 5)

Among the nine quantitative and one mixed method studies, four were at serious and one at critical risk of bias due to lack of valid representation of the outcomes (e.g. beneficial or harmful outcomes of medical cannabis), low response rate (less than 80%) and lack of reporting on how the authors confirmed participants' understanding of the measurement techniques (e.g. questionnaire) (Appendix 7). Among the five qualitative studies, only one was at serious risk of bias due to inadequate research design and data collection, and lack of reporting on whether the relationship between researchers and participants had been adequately considered (Appendix 8).

## Findings

We identified two key themes: values and preferences towards medical cannabis for chronic pain (seven quantitative studies [2,185 participants]), three qualitative studies [95 participants], and one mixed method study [984 participants]) and factors that influenced patient's decisions regarding use of medical cannabis (seven quantitative studies [4,998 participants], five qualitative studies [263 participants], and one mixed method study [984 participants]). (Table 2, Appendix 9).

### *Use of medical cannabis for chronic pain*

Low certainty evidence showed that patients had mixed levels of willingness to use medical cannabis and most patients who used medical cannabis reported positive attitudes toward its use. Most patients with advanced life-limiting illnesses were comfortable using cannabis for pain<sup>25</sup>, while some other patients with chronic pain were unwilling or ambivalent about medical cannabis use<sup>26</sup>. Non-White patients with advanced illness were more concerned about medical cannabis compared to White patients, but they remained comfortable using medical cannabis<sup>25</sup>. People living with chronic pain who used medical cannabis believed it was effective for reducing their pain<sup>25 27 31 34</sup> and allowed them to reduce use of prescribed medications<sup>27</sup>. Two qualitative studies found similar results<sup>22 28</sup>.

### *Medical cannabis vs. other pain medicines*

Patients with histories of substance use preferred medical cannabis over prescription opioids (Low certainty).<sup>23</sup> Some patients endorsed that medical cannabis was safer than other analgesics, and such beliefs were more prevalent among non-Christians

1  
2  
3 and patients with colleges education or higher (Very low certainty).<sup>25</sup>  
4  
5  
6  
7

### 8 ***Different preparations of medical cannabis***

9

10 Moderate certainty evidence showed that most people living with chronic pain  
11 preferred using a blend of indica and sativa to manage their condition.<sup>21</sup> There was  
12  
13 no difference in the preference of cannabis strain between males and females, those  
14  
15 who used cannabis for medical purposes only and those who endorsed medical and  
16  
17 recreational use, or between novice and experienced users.<sup>21</sup>  
18  
19  
20  
21

22  
23 Most patients preferred medical cannabis products with either balanced ratios  
24  
25 of THC:CBD (37%) or high CBD formulations (46%), and only a minority (17%)  
26  
27 preferred high THC products (Moderate certainty).<sup>21 33</sup> Specifically, women, novice  
28  
29 users, or those who endorsed use of cannabis for medical purposes only were more  
30  
31 inclined to choose products with low THC and high CBD ratios, while males, those  
32  
33 endorsing use of cannabis for both medical and recreational purposes, and  
34  
35 experienced users preferred products with equal ratios of THC:CBD.<sup>21</sup>  
36  
37  
38  
39

40 Sex, reason for use, and experience with cannabis influenced preference towards  
41  
42 route of administration (Moderate certainty).<sup>21 35</sup> Compared to male patients,  
43  
44 women preferred to use tinctures and topical preparations as opposed to vaporizing  
45  
46 or smoking<sup>21</sup>. Patients who used cannabis both recreationally and medically  
47  
48 preferred smoking most, while those who used cannabis medically only preferred  
49  
50 vaporizing most.<sup>21</sup> Experienced cannabis users endorsed multiple routes of  
51  
52 administration compared with novice users who preferred vaporizing.<sup>21</sup> Most  
53  
54 patients with advanced life-limiting illness preferred oral formulations (non-inhaled)  
55  
56  
57 of medical cannabis.<sup>25</sup>  
58  
59  
60



### ***Factors influencing the decision to use medical cannabis***

High to moderate certainty evidence showed that most people living with chronic pain used medical cannabis for symptom relief.<sup>20 22 23 28 35</sup> Specifically, patients viewed medical cannabis as an effective approach to managing pain<sup>20 22 23 35</sup>, sleep, appetite, and nausea.<sup>[20, 35]</sup> Patients also reported that cannabis improved their emotional and mental well-being by reducing anxiety, depression and stress,<sup>20 35</sup> and increased their ability to focus and function<sup>28</sup>. Most patients reported that cannabis facilitated a state of relaxation in which pain remained present but was easier to tolerate<sup>28</sup>.

Moderate certainty evidence showed that factors related to patients' unwillingness to use medical cannabis include major side effects (e.g. losing control or acting strangely)<sup>20 23 26 27 31 34 35</sup>, addiction or tolerance<sup>26 27 31 34 35</sup>, and negative social consequences (e.g. stigma)<sup>25 26 31 34, 20 32 35</sup>. Older age was associated with greater hesitancy to use medical cannabis, as was concerns about negative opinions from others which might lead to relationship problems or disagreements with loved ones<sup>25 26 31 34</sup>. Some patients reported that stigma affected their comfort in asking healthcare providers about cannabis as a treatment option, and their willingness to use medical cannabis in a public setting<sup>32</sup>. Moderate certainty evidence showed that cost, legal status, and accessibility of medical cannabis also influenced use<sup>31 34 20 23-25 35</sup>.

### ***Factors influencing the choice of different preparations of medical cannabis***

Low certainty evidence suggested that most patients chose medical cannabis

1  
2  
3 products based on cannabinoid content (i.e. THC or CBD potency, ratio of THC and  
4  
5 CBD), recommendations from dispensary employees, described effects (e.g. pain  
6  
7 relief), strain of cannabis plant (i.e. sativa, indica, hybrid), smell, or varietal name.<sup>21 22</sup>  
8  
9  
10 <sup>23 28 30</sup> A higher proportion of males selected cannabis products based on cannabinoid  
11  
12 content, cannabis variety, visual properties, and smell, while a higher proportion of  
13  
14 females consulted with a medical professional when choosing cannabis products  
15  
16 (Moderate certainty).<sup>21</sup>  
17  
18  
19

20 Patients who used cannabis both medically and recreationally were more likely  
21  
22 to select cannabis products based on cannabinoid content, cannabis variety,  
23  
24 described effects, visual properties, smell, recommendations from friends, and the  
25  
26 product name, while those who only used cannabis medically were more likely to  
27  
28 prioritize recommendations from dispensary employees or medical professionals  
29  
30 (Moderate certainty).<sup>21</sup>  
31  
32  
33  
34  
35  
36  
37  
38  
39  
40  
41  
42  
43  
44  
45  
46  
47  
48  
49  
50  
51  
52  
53  
54  
55  
56  
57  
58  
59  
60

## DISCUSSION

Values and preferences among patients with chronic pain towards the use of medical cannabis are highly variable. Improvement of symptoms and reduction of prescription medications are important factors that positively influence patients' decision to use medical cannabis, while concerns about addiction, losing control, acting strangely and negative social consequences are associated with unwillingness to use medical cannabis. Cost, legal status and accessibility are also important factors. Patients who endorsed use of cannabis for only medical reasons preferred high CBD or similar ratios of THC: CBD products, whereas those endorsing use of both medical and recreational purposes were more likely to use higher THC products. Further, patients with chronic pain endorsing both medical and recreational use were more likely to prefer smoking cannabis, versus patients who endorsed only medical use who preferred vaporizing. Our findings were consistent across bodies of evidence (quantitative, qualitative, and mixed method studies). The certainty of evidence for most findings was moderate, predominantly due to risk of bias or imprecision/ adequacy.

We asked three patient partners on the BMJ rapid recommendation panel for their comments on the findings of this systematic review. In particular, 1) whether our findings reflected their experiences, and 2) if some of the findings were different from their experience, what were possible reasons? The patient partners agreed that all except one of our review findings (Table 2) reflected their experiences with cannabis. Specifically, they suggested that patients who are using medical cannabis may not receive support from family or friends due to stigma and misinformation about cannabis use.

Our findings that some patients select medical cannabis based on properties that

1  
2  
3 dispensers attributed to strain type (indica or sativa), represents an opportunity for  
4  
5 education. When these strains were originally characterized, sativa was shown to  
6  
7 produce higher amounts of CBD whereas indica strains of cannabis produced high  
8  
9 levels of THC. At present, however, commercially available cannabis plants and  
10  
11 products have been extensively interbred to produce a multitude of unique strains.<sup>36</sup>  
12  
13  
14 As such, the only reliable way to determine the composition of any form of medical  
15  
16 cannabis is through accurate reporting of the cannabinoid (e.g. THC, CBD) content.  
17  
18  
19

20 We found important differences between patients who use cannabis for medical  
21  
22 reasons only and those who report combined use (medical and recreational) in  
23  
24 preferences regarding cannabis content and route of administration. Observational  
25  
26 studies have shown that most consumers of cannabis endorse medical and  
27  
28 recreational use,<sup>37 38</sup> which presents a challenge to therapeutic use. Recreational  
29  
30 users often prioritize cannabis with high THC concentrations, a psychotropic  
31  
32 cannabinoid that is associated with greater harms than CBD.<sup>39 40</sup> Patients that use  
33  
34 cannabis for both medical and recreational purposes are also more likely to prefer  
35  
36 inhaled forms of administration, which has a much faster onset and greater  
37  
38 bioavailability than ingestion but also entails pulmonary risk factors due to inhalation  
39  
40 of toxins and particulate matter.<sup>41</sup> Therapeutic use of cannabis should prioritize  
41  
42 formulations supported by evidence, administered in a manner that prioritizes both  
43  
44 safety and effectiveness.  
45  
46  
47  
48  
49  
50  
51  
52  
53

#### 54 **Strengths and limitations of the review**

55  
56 Strengths of this review include explicit eligibility criteria, an extensive search strategy,  
57  
58 and duplicate assessment of eligibility and risk of bias. The use of complementary  
59  
60

1  
2  
3 bodies of evidence (qualitative, quantitative and mixed-methods) and the use of the  
4  
5 GRADE approach to assess the certainty of evidence allowed greater confidence in the  
6  
7 interpretation of results.  
8  
9

10 This study also had limitations. Most of the eligible studies (13 out of 15 studies)  
11  
12 are from high-income countries, reflecting values and preferences of patients living in  
13  
14 better health care service systems with health insurance coverage. The generalizability  
15  
16 of our findings to other populations is uncertain. In addition, we synthesized and  
17  
18 reported patients' willingness to use medical cannabis despite the limitation that most  
19  
20 studies did not provide participants with sufficient information about the benefits and  
21  
22 harms of medical cannabis. Studies failed to consistently report participants' socio-  
23  
24 economic status, educational level, and religious beliefs, limiting exploration of the  
25  
26 effect of these characteristics on values and preferences.  
27  
28  
29  
30  
31  
32  
33

### 34 **Implications**

35  
36 Our findings have direct implications for clinicians attending people living with chronic  
37  
38 pain who are considering use of medical cannabis. Benefits (effect on pain and  
39  
40 reduction of prescription medications), harms (adverse effects), burdens (negative  
41  
42 social consequences, cost) and accessibility (including legal status) of medical cannabis  
43  
44 all appear to influence patients' decisions related to use. However, we did not identify  
45  
46 any studies that considered how patients prioritized these factors. Subsequent  
47  
48 research should address this issue. In addition, how patient characteristics (e.g.  
49  
50 medical conditions, social economic status, religious beliefs) affect their values and  
51  
52 preferences is another issue worth addressing in subsequent research.  
53  
54  
55  
56  
57  
58  
59  
60

## CONCLUSIONS

There exists high variability of values and preferences towards medical cannabis among people living with chronic pain, particularly related to their willingness to use medical cannabis. These findings suggest that an individualized patient-centred approach, such as shared decision-making, should be emphasized for empowering patients to make choices that best suit their own values and preferences and accommodate their context.

1  
2  
3  
4  
5  
6  
7  
8  
9  
10  
11  
12  
13  
14  
15  
16  
17  
18  
19  
20  
21  
22  
23  
24  
25  
26  
27  
28  
29  
30  
31  
32  
33  
34  
35  
36  
37  
38  
39  
40  
41  
42  
43  
44  
45  
46  
47  
48  
49  
50  
51  
52  
53  
54  
55  
56  
57  
58  
59  
60

**Figure Legends**

Figure 1: Evidence search and selection

For peer review only

### Contributors

LZ, XW, NK, SA, YS and MAE identified and selected the studies. LZ, XW, NK, SA, YS and MAE collected the data. LZ, LL, XW, NK and SA analysed the data and assessed the certainty of the evidence. AFH, TA, GG and JWB provided advice at different stages. LZ, LL, XW, NK, SA drafted the manuscript. All authors revised the manuscript and approved the final version of the manuscript.

### Funding

XW is supported by a post-doctoral fellowship from the Michael G. DeGroot Institute for Pain Research & Care.

**Competing interests** None

**Ethical approval:** Ethics approval for this study was not required.

**Data sharing:** Raw data are available on request from the corresponding author.

**Acknowledgement** We thank Rachel Couban (McMaster University) for performing the literature search; we thank Ray Zhang (McMaster University) for providing consult with the certainty of evidence rating; we thank Shelly-Anne Li (University of Toronto) for providing suggestions on data synthesis; we thank our patient partners for providing comments on review findings.



## References

1. James SL, Abate D, Abate KH, et al. Global, regional, and national incidence, prevalence, and years lived with disability for 354 diseases and injuries for 195 countries and territories, 1990–2017: a systematic analysis for the Global Burden of Disease Study 2017. *The Lancet* 2018;392(10159):1789-858.
2. Goldberg DS, McGee SJ. Pain as a global public health priority. *BMC public health* 2011;11(1):1-5.
3. Jackson T, Thomas S, Stabile V, et al. Prevalence of chronic pain in low-income and middle-income countries: a systematic review and meta-analysis. *The Lancet* 2015;385:S10.
4. Hill KP. Medical marijuana for treatment of chronic pain and other medical and psychiatric problems: a clinical review. *Jama* 2015;313(24):2474-83.
5. Medical cannabis: bridging the evidence gap. Vol 1:e195.
6. Hill KP. Medical marijuana: more questions than answers. *Journal of psychiatric practice* 2014;20(5):389.
7. The National Institute for Health and Care Excellence (NICE) Cannabis-based medicinal products (NG144). 2019 (Available at: <https://www.nice.org.uk/guidance/ng144/chapter/Recommendations#chronic-pain> [accessed 7 March 2021])
8. Yadav V, Bever C, Bowen J, et al. Summary of evidence-based guideline: complementary and alternative medicine in multiple sclerosis: report of the guideline development subcommittee of the American Academy of Neurology. *Neurology* 2014;82(12):1083-92.

- 1  
2  
3 9. Guyatt GH, Haynes RB, Jaeschke RZ, et al. Users' guides to the medical literature:  
4  
5 XXV. Evidence-based medicine: principles for applying the users' guides to patient  
6  
7 care. *Jama* 2000;284(10):1290-96.  
8  
9
- 10 10. Busse JW VP, Zeng L, et al. Medical cannabis for chronic pain: a clinical practice  
11  
12 guideline. *BMJ*  
13
- 14 11. Selva A, Solà I, Zhang Y, et al. Development and use of a content search strategy  
15  
16 for retrieving studies on patients' views and preferences. *Health and quality of life*  
17  
18 *outcomes* 2017;15(1):126.  
19  
20
- 21 12. Valli C, Rabassa M, Johnston BC, et al. Health-related values and preferences  
22  
23 regarding meat consumption: a mixed-methods systematic review. *Annals of*  
24  
25 *Internal Medicine* 2019;171(10):742-55.  
26  
27
- 28 13. Zhang Y, Alonso-Coello P, Guyatt GH, et al. GRADE Guidelines: 19. Assessing the  
29  
30 certainty of evidence in the importance of outcomes or values and preferences—  
31  
32 Risk of bias and indirectness. *Journal of clinical epidemiology* 2019;111:94-104.  
33  
34
- 35 14. Critical Appraisal Skills Programme (2018) CASP Qualitative Research Checklist.  
36  
37 [online]. 2018  
38  
39
- 40 15. Barnett-Page E, Thomas J. Methods for the synthesis of qualitative research: a  
41  
42 critical review. *BMC medical research methodology* 2009;9(1):1-11.  
43  
44
- 45 16. Karimi M, Clark AM. How do patients' values influence heart failure self-care  
46  
47 decision-making?: A mixed-methods systematic review. *International journal of*  
48  
49 *nursing studies* 2016;59:89-104.  
50  
51
- 52 17. Zhang Y, Coello PA, Guyatt GH, et al. GRADE guidelines: 20. Assessing the  
53  
54 certainty of evidence in the importance of outcomes or values and preferences—  
55  
56  
57  
58  
59  
60

- 1  
2  
3 inconsistency, imprecision, and other domains. *Journal of clinical epidemiology*  
4  
5 2019;111:83-93.  
6  
7
- 8 18. Guyatt GH, Oxman AD, Schünemann HJ, et al. GRADE guidelines: a new series of  
9  
10 articles in the Journal of Clinical Epidemiology. *Journal of clinical epidemiology*  
11  
12 2011;64(4):380-82.  
13  
14
- 15 19. Lewin S, Bohren M, Rashidian A, et al. Applying GRADE-CERQual to qualitative  
16  
17 evidence synthesis findings—paper 2: how to make an overall CERQual  
18  
19 assessment of confidence and create a Summary of Qualitative Findings table.  
20  
21  
22 *Implementation Science* 2018;13(1):10.  
23  
24
- 25 20. Bigand T, Anderson CL, Roberts ML, et al. Benefits and adverse effects of  
26  
27 cannabis use among adults with persistent pain. *Nursing outlook* 2019;67(3):223-  
28  
29 31.  
30  
31
- 32 21. Boehnke KF, Scott JR, Litinas E, et al. Cannabis use preferences and decision-  
33  
34 making among a cross-sectional cohort of medical cannabis patients with chronic  
35  
36 pain. *The Journal of Pain* 2019;20(11):1362-72.  
37  
38  
39
- 40 22. Bruce D, Brady JP, Foster E, et al. Preferences for medical marijuana over  
41  
42 prescription medications among persons living with chronic conditions:  
43  
44 Alternative, complementary, and tapering uses. *The Journal of Alternative and*  
45  
46 *Complementary Medicine* 2018;24(2):146-53.  
47  
48
- 49 23. Cooke AC, Knight KR, Miaskowski C. Patients' and clinicians' perspectives of co-  
50  
51 use of cannabis and opioids for chronic non-cancer pain management in primary  
52  
53 care. *International Journal of Drug Policy* 2019;63:23-28.  
54  
55  
56  
57  
58  
59  
60

- 1  
2  
3 24. Degenhardt L, Lintzeris N, Campbell G, et al. Experience of adjunctive cannabis  
4 use for chronic non-cancer pain: findings from the Pain and Opioids IN Treatment  
5 (POINT) study. *Drug and alcohol dependence* 2015;147:144-50.  
6  
7  
8  
9  
10 25. Gallagher R, Best JA, Fyles G, et al. Attitudes and Beliefs About the Use of  
11 Cannabis for Symptom Control in a Palliative Population. *Journal of Cannabis*  
12 *Therapeutics* 2003;3(2):41-50.  
13  
14  
15  
16  
17 26. Gill A, Williams ACdC. Preliminary study of chronic pain patients' concerns about  
18 cannabinoids as analgesics. *The Clinical journal of pain* 2001;17(3):245-48.  
19  
20  
21  
22 27. Heng M, McTague MF, Lucas RC, et al. Patient perceptions of the use of medical  
23 marijuana in the treatment of pain after musculoskeletal trauma: a survey of  
24 patients at 2 trauma centers in Massachusetts. *Journal of Orthopaedic Trauma*  
25 2018;32(1):e25-e30.  
26  
27  
28  
29  
30 28. Lavie-Ajayi M, Shvartzman P. Restored self: a phenomenological study of pain  
31 relief by cannabis. *Pain Medicine* 2019;20(11):2086-93.  
32  
33  
34  
35  
36 29. Rochford C, Edgeworth D, Hashim M, et al. Attitudes of Irish patients with  
37 chronic pain towards medicinal cannabis. *Irish Journal of Medical Science (1971-)*  
38 2019;188(1):267-72.  
39  
40  
41  
42  
43 30. Sexton M, Cuttler C, Finnell JS, et al. A cross-sectional survey of medical cannabis  
44 users: patterns of use and perceived efficacy. *Cannabis and cannabinoid research*  
45 2016;1(1):131-38.  
46  
47  
48  
49  
50 31. Zarrabi AJ, Welsh JW, Sniecinski R, et al. Perception of benefits and harms of  
51 medical cannabis among seriously ill patients in an outpatient palliative care  
52 practice. *Journal of Palliative Medicine* 2020;23(4):558-62.  
53  
54  
55  
56  
57  
58  
59  
60

- 1  
2  
3 32. Satterlund TD, Lee JP, Moore RS. Stigma among California's medical marijuana  
4 patients. *Journal of psychoactive drugs* 2015;47(1):10-17.  
5  
6  
7  
8 33. Notcutt W, Price M, Miller R, et al. Initial experiences with medicinal extracts of  
9 cannabis for chronic pain: results from 34 'N of 1' studies. *Anaesthesia*  
10 2004;59(5):440-52.  
11  
12  
13 34. Singh V, Zarrabi AJ, Curseen KA, et al. Concerns of patients with cancer on  
14 accessing cannabis products in a state with restrictive medical marijuana laws: a  
15 survey study. *Journal of oncology practice* 2019;15(10):531-38.  
16  
17  
18 35. Piper BJ, Beals ML, Abess AT, et al. Chronic pain patients' perspectives of medical  
19 cannabis. *Pain* 2017;158(7):1373.  
20  
21  
22 36. Piomelli D, Russo EB. The Cannabis sativa versus Cannabis indica debate: an  
23 interview with Ethan Russo, MD. *Cannabis and cannabinoid research*  
24 2016;1(1):44-46.  
25  
26  
27 37. Turna J, Balodis I, Munn C, et al. Overlapping patterns of recreational and  
28 medical cannabis use in a large community sample of cannabis users.  
29  
30  
31 *Comprehensive Psychiatry* 2020:152188.  
32  
33  
34 38. Pacula RL, Jacobson M, Maksabedian EJ. In the weeds: a baseline view of  
35 cannabis use among legalizing states and their neighbours. *Addiction*  
36 2016;111(6):973-80.  
37  
38  
39 39. Cannabidiol (CBD) critical review report. Expert Committee on Drug Dependence  
40 Fortieth Meeting, Geneva; 2018.  
41  
42  
43 40. Hall W. What has research over the past two decades revealed about the adverse  
44 health effects of recreational cannabis use? *Addiction* 2015;110(1):19-35.  
45  
46  
47  
48  
49  
50  
51  
52  
53  
54  
55  
56  
57  
58  
59  
60

- 1  
2  
3 41. Marijuana Research Report (Revised July 2020): National Institute on Drug Abuse;  
4  
5 2020 [Available from: [https://www.drugabuse.gov/publications/research-](https://www.drugabuse.gov/publications/research-reports/marijuana/what-are-marijuanas-effects-lung-health)  
6  
7 [reports/marijuana/what-are-marijuanas-effects-lung-health](https://www.drugabuse.gov/publications/research-reports/marijuana/what-are-marijuanas-effects-lung-health).  
8  
9  
10  
11  
12  
13  
14  
15  
16  
17  
18  
19  
20  
21  
22  
23  
24  
25  
26  
27  
28  
29  
30  
31  
32  
33  
34  
35  
36  
37  
38  
39  
40  
41  
42  
43  
44  
45  
46  
47  
48  
49  
50  
51  
52  
53  
54  
55  
56  
57  
58  
59  
60

For peer review only

**Table 1 Critical meta-narrative synthesis: from quantitative data to narratives**

| Systematic profiles <sup>a</sup> |                                                              |                                                                                                                                                                                                                                                                                                                                                                                                                                                                                                                                                                                              | Critical questions                                                                                                                                                                                                                                                                                                                                                                                                                                                                                                                                                                                                      |
|----------------------------------|--------------------------------------------------------------|----------------------------------------------------------------------------------------------------------------------------------------------------------------------------------------------------------------------------------------------------------------------------------------------------------------------------------------------------------------------------------------------------------------------------------------------------------------------------------------------------------------------------------------------------------------------------------------------|-------------------------------------------------------------------------------------------------------------------------------------------------------------------------------------------------------------------------------------------------------------------------------------------------------------------------------------------------------------------------------------------------------------------------------------------------------------------------------------------------------------------------------------------------------------------------------------------------------------------------|
| Technique                        | Focus                                                        | Example                                                                                                                                                                                                                                                                                                                                                                                                                                                                                                                                                                                      |                                                                                                                                                                                                                                                                                                                                                                                                                                                                                                                                                                                                                         |
| Modal profile                    | The most frequently occurring attributes                     | When asked to state the preference for route of administration: 86% (69/80) patients were comfortable with an oral form (pills, drops or added to food), while 15% (12/80) chose smoking .<br><b>This was qualitized as:</b> Most patients stated preference for oral formulations, while a minority preferred inhaled products.                                                                                                                                                                                                                                                             | What is this study trying to say about patients’ values? Are patients’ values and preferences explicitly identified? If so, what are they?<br>How do participants’ answers to the questions provide insight into patients’ values and preferences, and their influence on the choice of treatment for chronic pain?<br>How different (or similar) are patients’ and carers’ perspectives on medical cannabis for chronic pain?<br>Are there other individual or contextual factors (e.g., age, gender, socioeconomic status) that influence patients’ values and preferences towards medical cannabis for chronic pain? |
| Average profile                  | Average of the particular variables                          | Patients’ concerns regarding medical cannabis using a 10-point scale (0 = not concerned, 10= extremely concerned) were, in order of important: side effects (mean = 7.0±2.9), addiction (6.6±3.2), tolerance (6.2±3.2), losing control or acting strangely (6.2±3.3), and what family and friends may think (3.9±3.8).<br><b>This was qualitized as:</b> Patients were generally most concerned about the side effects of medical cannabis, followed by addiction, tolerance, losing control or acting strangely, and what family and friends may think.                                     |                                                                                                                                                                                                                                                                                                                                                                                                                                                                                                                                                                                                                         |
| Comparative profile              | A comparison of key outcomes                                 | Patients were asked to rate their values and concerns regarding use of cannabis (strongly agree, agree, disagree, strongly disagree and don't know). Significantly more males, vs. women, were concerned about cannabis being addictive (p =0.031), leading to the use of more harmful substances (p =0.036), and causing an inability to think clearly (p =0.008).<br><b>This was qualitized as:</b> Compared to females, significantly more males were concerned about cannabis being addictive, leading to the use of more harmful substances, and causing an inability to think clearly. |                                                                                                                                                                                                                                                                                                                                                                                                                                                                                                                                                                                                                         |
| Holistic profile                 | A combination of the modal, average and comparative profiles | Patients were asked to rate their willingness to use medical cannabis on a 0-10 point scale (0=extreme unwillingness to 10=extreme willingness). Greater unwillingness was associated with higher age (bivariate correlation coefficient [r]= 0.40; p=0.001), but not with pain intensity or duration, or sex.<br><b>This was qualitized as:</b> Higher age was related to more unwillingness to use medical cannabis.                                                                                                                                                                       |                                                                                                                                                                                                                                                                                                                                                                                                                                                                                                                                                                                                                         |

Note:

Abbreviation: SD: Standard deviation.

a. We used the following criteria when “qualitizing” quantitative into qualitative data:

1  
2  
3  
4  
5 “All or almost all”: Reported by over 90% of patients; “Most”: Reported by 75 to 90% of patients; “Majority”: Reported by 50 to 75% of patients; “Minority”:  
6 Reported by 25-50% of patients; “Some”: Reported by 10%-25% of patients; “None or almost none”: Reported by 10% or less of patients (if the sample was 100 or  
7 less)  
8 “Very few”: Reported by 10% or less of patients (if the sample was >100). "Most common" and "least common" were used when factors were reported in groups,  
9 to denote the factors that patients agreed with the most vs. the least. The criteria above did not apply in these cases (e.g. "Recommendations from a medical  
10 professional was the least influential factor among patients when selecting cannabis.").

11  
12  
13  
14  
15  
16  
17  
18  
19  
20  
21  
22  
23  
24  
25  
26  
27  
28  
29  
30  
31  
32  
33  
34  
35  
36  
37  
38  
39  
40  
41  
42  
43  
44  
45  
46

For peer review only



**Table 2 Review findings and certainty of evidence**

| Review Findings <sup>a</sup>                                                                                                                                                  | Type of Research Evidence: Reference number | Certainty of Evidence                                                   |
|-------------------------------------------------------------------------------------------------------------------------------------------------------------------------------|---------------------------------------------|-------------------------------------------------------------------------|
| <b>Values and preferences towards medical cannabis for chronic pain</b>                                                                                                       |                                             |                                                                         |
| <b>Use of medical cannabis for chronic pain</b>                                                                                                                               |                                             |                                                                         |
| Chronic pain patients had mixed levels of comfort or willingness to use medical cannabis.                                                                                     | Quantitative: 25,26,27                      | Low: Risk of bias and indirectness                                      |
|                                                                                                                                                                               | Qualitative: 22                             | Low: Minor concerns about relevance, serious adequacy concerns          |
| Most patients who use medical cannabis had a positive attitude toward its use for pain relief.                                                                                | Quantitative: 25,27, 29,31,34               | Low: Risk of bias and indirectness                                      |
|                                                                                                                                                                               | Qualitative: 28                             | Moderate: Serious adequacy concerns                                     |
| <b>Medical cannabis over other pain medicines</b>                                                                                                                             |                                             |                                                                         |
| Patients with chronic pain and substance use histories preferred medical cannabis over prescription opioids.                                                                  | Qualitative: 23                             | Low: Moderate methodological limitations and moderate adequacy concerns |
| Some patients believed that medical cannabis is safer than morphine and other strong pain killers.                                                                            | Quantitative: 25                            | Very low: Risk of bias, indirectness and imprecision                    |
| <b>Different preparations of medical cannabis</b>                                                                                                                             |                                             |                                                                         |
| <b><i>Cannabis variety (i.e. sativa, indica, hybrid)</i></b>                                                                                                                  |                                             |                                                                         |
| Most patients preferred medical cannabis with a blend of indica and sativa, regardless of gender, reasons for use, and cannabis experience level.                             | Quantitative: 21                            | Moderate: Risk of bias                                                  |
| <b><i>Cannabis content (i.e. THC or CBD potency, ratio of THC and CBD)</i></b>                                                                                                |                                             |                                                                         |
| A balanced ratio of THC:CBD was the most preferred preparation, but gender, reason for use, and cannabis experience level influenced patients' preference for cannabis ratio. | Quantitative: 21, 33                        | Moderate: Risk of bias                                                  |

|    |                                                                                     |                            |                                   |
|----|-------------------------------------------------------------------------------------|----------------------------|-----------------------------------|
| 1  |                                                                                     |                            |                                   |
| 2  |                                                                                     |                            |                                   |
| 3  |                                                                                     |                            |                                   |
| 4  |                                                                                     |                            |                                   |
| 5  | <b><i>Cannabis administration route</i></b>                                         |                            |                                   |
| 6  | Gender, reason for use and cannabis experience level                                | Quantitative: 21           | Moderate: Risk of bias            |
| 7  | influenced patients' preferred cannabis administration routes.                      | Mixed method: 35           |                                   |
| 8  | Most patients with advanced life-limiting illness                                   | Quantitative: 25           | Low: Risk of bias and imprecision |
| 9  | preferred an oral form (non-inhaled) of medical cannabis.                           |                            |                                   |
| 10 | <b>Factors that influenced patient's decision regarding use of medical cannabis</b> |                            |                                   |
| 11 | <b>Factors influenced the choice of medical cannabis use</b>                        |                            |                                   |
| 12 | Most patients used medical cannabis because it improved                             | Qualitative: 20,22,23,28   | High                              |
| 13 | symptoms associated with pain, mental health and other                              |                            |                                   |
| 14 | medical conditions.                                                                 |                            |                                   |
| 15 |                                                                                     |                            |                                   |
| 16 |                                                                                     | Mixed method: 35           | Moderate: Risk of bias            |
| 17 | Most patients were motivated to use medical cannabis to                             | Quantitative study: 27     | Moderate: Risk of bias            |
| 18 | reduce use of prescription medication.                                              | Qualitative study: 22      | Moderate: Moderate adequacy       |
| 19 |                                                                                     |                            | concerns                          |
| 20 | The majority of patients expressed that their cannabis use was                      | Quantitative: 25, 31,34    | Moderate: Risk of bias            |
| 21 | influenced by positive social consequences, such as social                          |                            |                                   |
| 22 | support from friends and family.                                                    |                            |                                   |
| 23 | Most patients expressed concerns with using medical                                 | Quantitative: 26, 27,31,34 | Moderate: Risk of bias            |
| 24 | cannabis, and described a range of adverse effects.                                 | Mixed method: 35           |                                   |
| 25 |                                                                                     | Qualitative : 20, 23       | Moderate: Moderate                |
| 26 |                                                                                     |                            | methodological concerns           |
| 27 |                                                                                     |                            |                                   |
| 28 | Most patients expressed that their cannabis use was                                 | Quantitative: 25,26, 31,34 | Moderate: Risk of bias            |
| 29 | influenced by negative social consequences, such as stigma.                         | Mixed method: 35           |                                   |
| 30 |                                                                                     | Qualitative: 20, 32        | Moderate: Moderate                |
| 31 |                                                                                     |                            | methodological limitations        |
| 32 | The cost, legal status, and accessibility of medical cannabis                       | Quantitative: 24,25, 31,34 | Moderate: Risk of bias            |
| 33 | influenced patients' decisions to use medical cannabis.                             | Mixed method: 35           |                                   |
| 34 |                                                                                     | Qualitative: 20, 23        | Moderate: Moderate                |
| 35 |                                                                                     |                            | methodological limitations        |
| 36 |                                                                                     |                            |                                   |
| 37 | <b>Factors influenced the choice of different preparations of medical cannabis</b>  |                            |                                   |
| 38 |                                                                                     |                            |                                   |
| 39 |                                                                                     |                            |                                   |
| 40 |                                                                                     |                            |                                   |
| 41 |                                                                                     |                            |                                   |
| 42 |                                                                                     |                            |                                   |
| 43 |                                                                                     |                            |                                   |
| 44 |                                                                                     |                            |                                   |
| 45 |                                                                                     |                            |                                   |
| 46 |                                                                                     |                            |                                   |

1  
2  
3  
4  
5  
6  
7  
8  
9  
10  
11  
12  
13  
14  
15  
16  
17  
18  
19  
20  
21  
22  
23  
24  
25  
26  
27  
28  
29  
30  
31  
32  
33  
34  
35  
36  
37  
38  
39  
40  
41  
42  
43  
44  
45  
46

Patients chose medical cannabis products mainly based on cannabinoid content, recommendations from dispensary employees, described effects and side effects, strain of cannabis plant, smell, and flower appearance.

Quantitative: 21, 30

Low: Risk of bias and indirectness

Qualitative: 22, 23, 28

Low: Moderate concerns about coherence and serious adequacy concerns

Gender, reason for use, and level of use experience were factors influencing patients' selection of cannabis products.

Quantitative: 21

Moderate: Risk of bias

Note:

Abbreviations: CBD: cannabidiol; THC: Delta-9-tetrahydrocannabinol.

- a. We used the following criteria when "qualitizing" quantitative into qualitative data:
  - "All or almost all": Reported by over 90% of patients;
  - "Most": Reported by 75 to 90% of patients;
  - "Majority": Reported by 50 to 75% of patients;
  - "Minority": Reported by 25-50% of patients;
  - "Some": Reported by 10%-25% of patients;
  - "None or almost none": Reported by 10% or less of patients (if the sample was 100 or less)
  - "Very few": Reported by 10% or less of patients (if the sample was 101 or more). "Most common" and "least common" were used when factors were reported in groups, to denote the factors that patients agreed with the most vs. the least. The criteria above did not apply in these cases (e.g. "Recommendations from a medical professional was the least influential factor among patients when selecting cannabis.").

Figure 1 Evidence search and selection

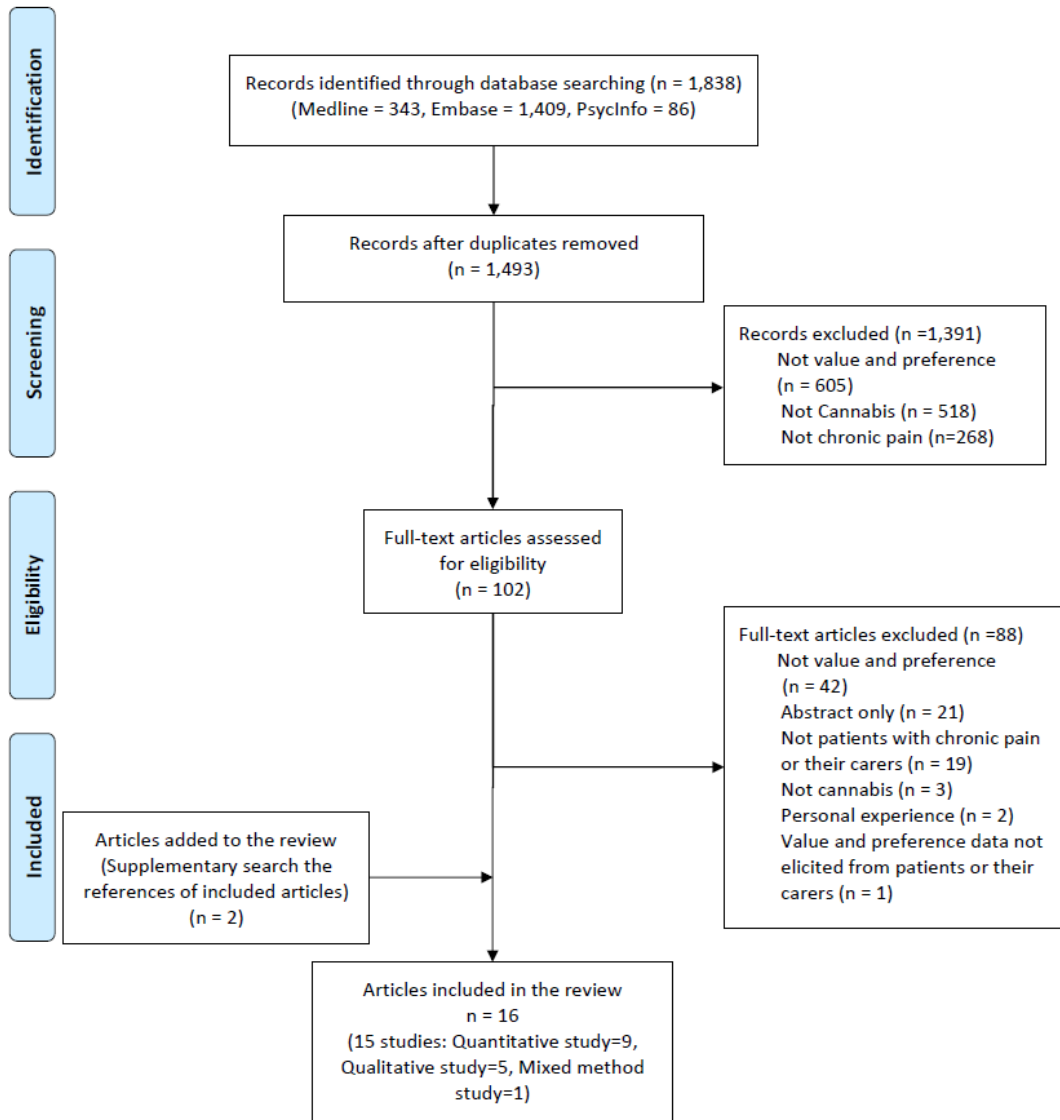

From: Moher D, Liberati A, Tetzlaff J, Altman DG, The PRISMA Group (2009). Preferred Reporting Items for Systematic Reviews and Meta-Analyses: The PRISMA Statement. PLoS Med 6(7): e1000097. doi:10.1371/journal.pmed1000097

1  
2  
3  
4  
5  
6  
7  
8  
9  
10  
11  
12  
13  
14  
15  
16  
17  
18  
19  
20  
21  
22  
23  
24  
25  
26  
27  
28  
29  
30  
31  
32  
33  
34  
35  
36  
37  
38  
39  
40  
41  
42  
43  
44  
45  
46

## Appendix 1 Search strategies and results in MEDLINE, Embase and PsycInfo

March 17, 2020

MEDLINE

Database: OVID Medline Epub Ahead of Print, In-Process & Other Non-Indexed Citations, Ovid MEDLINE(R) Daily and Ovid MEDLINE(R) 1946 to Present

Search Strategy:

-----  
1 Cannabis/ (8934)  
2 exp cannabinoids/ or cannabidiol/ or cannabinol/ or dronabinol/ (13763)  
3 Endocannabinoids/ (5620)  
4 exp Receptors, Cannabinoid/ (9222)  
5 (Cannabis or cannabinol or cannabinoid\* or cannabidiol or bhang or cannador or charas or ganja or ganjah or hashish or hemp or marihuana or marijuana or nabilone or cesamet or cesametic or ajulemic acid or cannabichromene or cannabielsoin or cannabigerol or tetrahydrocannabinol or dronabinol or levonantradol or nabiximols or palmidrol or tetrahydrocannabinolic acid or tetrahydro cannabinol or marinol or tetranabinex or sativex or endocannabinoid\*).mp. (54746)  
6 or/1-5 (54746)  
7 "marijuana use"/ or marijuana smoking/ (5304)  
8 Marijuana Abuse/ (6168)  
9 (epidiolex or gwp 42003p or gwp42003p or nabidiolex or dronabinol or thc or tetrahydrocannabinol\* or ea 1477 or ea1477 or marinol or qcd 84924 or syndros or tetrabinex or tetranabinex or cesamet or nabilone or deltanyne or "abbott 40566" or namisol or dronabinolum or "QCD 84924" or "CCRIS 4726" or nabiximol? or "gw 1000" or gw1000 or "sab 378" or sab378 or sativex).mp. [mp=title, abstract, original title, name of substance word, subject heading word, floating sub-heading word, keyword heading word, organism supplementary concept word, protocol supplementary concept word, rare disease supplementary concept word, unique identifier, synonyms] (11622)  
10 or/7-9 (20972)  
11 or/1-10 (55952)  
12 \*Attitude to Health/ (42364)  
13 \*Patient Participation/ (14355)  
14 \*Patient Preference/ (5009)  
15 preference\*.ti,ab. (148469)  
16 choice.ti. (31408)  
17 choices.ti. (6250)  
18 value.ti. (124160)  
19 health state values.ti,ab. (175)  
20 valuation\*.ti. (1523)

- 1  
2  
3  
4  
5 21 expectation\*.ti,ab. (85695)  
6 22 attitude\*.ti,ab. (144860)  
7 23 acceptab\*.ti,ab. (174183)  
8 24 knowledge.ti,ab. (676935)  
9 25 point of view.ti,ab. (41412)  
10 26 user participation.ti,ab. (243)  
11 27 users participation.ti,ab. (49)  
12 28 patient participation.ti,ab. (2134)  
13 29 patients participation.ti,ab. (589)  
14 30 patient perspective\*.ti,ab. (3526)  
15 31 patients perspective\*.ti,ab. (5820)  
16 32 user perspective\*.ti,ab. (466)  
17 33 users perspective\*.ti,ab. (513)  
18 34 patient perce\*.ti,ab. (5165)  
19 35 patients perce\*.ti,ab. (9776)  
20 36 health perception\*.ti,ab. (2652)  
21 37 user perce\*.ti,ab. (351)  
22 38 users perce\*.ti,ab. (786)  
23 39 user view\*.ti,ab. (110)  
24 40 users view\*.ti,ab. (369)  
25 41 patient view\*.ti,ab. (546)  
26 42 patients view\*.ti,ab. (2807)  
27 43 ((decision\* and mak\*).ti. or (decision mak\* or decisions mak\*).ti,ab.) and (patient\* or user\* or men or women).ti,ab. (73905)  
28 44 discrete choice\*.ti,ab. (1942)  
29 45 decision board\*.ti,ab. (45)  
30 46 decision analy\*.ti,ab. (7477)  
31 47 decision-support.ti,ab. (13930)  
32 48 decision tool\*.ti,ab. (808)  
33 49 decision aid\*.ti,ab. (2976)  
34 50 discrete-choice\*.ti,ab. (1942)  
35 51 \*Decision Making/ and (patient\* or user\* or men or women).ti. (5869)  
36 52 decision support techniques/ (19921)  
37  
38  
39  
40  
41  
42  
43  
44  
45  
46

- 1  
2  
3  
4  
5 53 (health and utilit\*).ti. (1434)  
6 54 gamble\*.ti,ab. (4395)  
7 55 prospect theory.ti,ab. (285)  
8 56 preference score.ti,ab. (163)  
9 57 preference elicitation.ti,ab. (179)  
10 58 health utilit\*.ti,ab. (2017)  
11 59 utility value\*.ti,ab. (1487)  
12 60 utility score\*.ti,ab. (1378)  
13 61 Utility estimate\*.ti,ab. (269)  
14 62 health state.ti,ab. (4119)  
15 63 feeling thermometer\*.ti,ab. (68)  
16 64 best-worst scaling.ti,ab. (202)  
17 65 standard gamble.ti,ab. (832)  
18 66 time trade-off.ti,ab. (1150)  
19 67 TTO.ti,ab. (1026)  
20 68 probability trade-off.ti,ab. (20)  
21 69 utility score.ti,ab. (507)  
22 70 preference based.ti,ab. (1291)  
23 71 preference score\*.ti,ab. (495)  
24 72 multiattribute.ti,ab. (337)  
25 73 multi attribute.ti,ab. (523)  
26 74 EuroQol 5D.ti,ab. (1268)  
27 75 EuroQol5D.ti,ab. (19)  
28 76 EQ5D.ti,ab. (550)  
29 77 EQ 5D.ti,ab. (7695)  
30 78 SF6D.ti,ab. (32)  
31 79 SF 6D.ti,ab. (753)  
32 80 HUI.ti,ab. (1169)  
33 81 15D.ti,ab. (1704)  
34 82 or/12-81 (1494263)  
35 83 (patient adj3 (value\* or preference\*)).ti,ab. (16093)  
36 84 (patient\* adj5 (report\* or relate\*) adj5 (outcome\* or measure\* or assess\*)).mp. (41519)  
37  
38  
39  
40  
41  
42  
43  
44  
45  
46

For peer review only

- 1  
2  
3  
4  
5 85 patient participation/ or doctor patient relation/ or nurse patient relationship/ or patient attitude/ or patient preference/ or patient satisfaction/ or patient  
6 compliance/ or medication compliance/ or patient decision making/ or patient education/ or chronic patient/ or attitude to health/ or "quality of life"/ or self  
7 care/ or self concept/ or self examination/ or adaptive behavior/ or coping behavior/ or coping.ab,ti. or needs assessment/ or personal autonomy/ or patient  
8 advocacy/ or life event/ (688791)
- 9 86 (patient\* adj3 (prefer\* or participat\* or involve\* or perspective\* or view\* or activat\* or empower\* or collaborate)).mp. [mp=title, abstract, original title, name  
10 of substance word, subject heading word, floating sub-heading word, keyword heading word, organism supplementary concept word, protocol supplementary  
11 concept word, rare disease supplementary concept word, unique identifier, synonyms] (154936)
- 12 87 (patient\* adj2 (attitude\* or decision\* or needs\*)).mp. [mp=title, abstract, original title, name of substance word, subject heading word, floating sub-heading  
13 word, keyword heading word, organism supplementary concept word, protocol supplementary concept word, rare disease supplementary concept word, unique  
14 identifier, synonyms] (32381)
- 15 88 expert patient\*.mp. (261)
- 16 89 (patient\* and (centre\* or center\* or focus\*)).mp. [mp=title, abstract, original title, name of substance word, subject heading word, floating sub-heading word,  
17 keyword heading word, organism supplementary concept word, protocol supplementary concept word, rare disease supplementary concept word, unique  
18 identifier, synonyms] (726322)
- 19 90 patient\*.mp. and (decision making/ or medical decision making/ or cooperation/ or distress syndrome/ or emotional stress/) [mp=title, abstract, original title,  
20 name of substance word, subject heading word, floating sub-heading word, keyword heading word, organism supplementary concept word, protocol  
21 supplementary concept word, rare disease supplementary concept word, unique identifier, synonyms] (44808)
- 22 91 or/83-90 (1481530)
- 23 92 82 or 91 (2686916)
- 24 93 11 and 92 (6739)
- 25 94 (chronic adj4 pain\*).mp. (68992)
- 26 95 Chronic Pain/ (13719)
- 27 96 exp Osteoarthritis/ (61921)
- 28 97 osteoarthrit\*.mp. (88211)
- 29 98 osteo-arthrit\*.mp. [mp=title, abstract, original title, name of substance word, subject heading word, floating sub-heading word, keyword heading word,  
30 organism supplementary concept word, protocol supplementary concept word, rare disease supplementary concept word, unique identifier, synonyms] (474)
- 31 99 exp Arthritis, Rheumatoid/ (111604)
- 32 100 exp Neuralgia/ (20041)
- 33 101 Diabetic Neuropathies/ (14472)
- 34 102 (neuropath\* adj5 pain\*).mp. [mp=title, abstract, original title, name of substance word, subject heading word, floating sub-heading word, keyword heading  
35 word, organism supplementary concept word, protocol supplementary concept word, rare disease supplementary concept word, unique identifier, synonyms]  
36 (24189)
- 37  
38  
39  
40  
41  
42  
43  
44  
45  
46



1  
2  
3  
4  
5  
6  
7  
8  
9  
10  
11  
12  
13  
14  
15  
16  
17  
18  
19  
20  
21  
22  
23  
24  
25  
26  
27  
28  
29  
30  
31  
32  
33  
34  
35  
36  
37  
38  
39  
40  
41  
42  
43  
44  
45  
46

- 103 neuralg\*.mp. (26998)  
104 zoster.mp. (20810)  
105 Irritable Bowel Syndrome/ (7099)  
106 IBS.mp. (8807)  
107 Migraine Disorders/ (24884)  
108 migraine\*.mp. (38930)  
109 Fibromyalgia/ (8287)  
110 Fibromyalg\*.mp. (11565)  
111 complex regional pain syndromes/ or causalgia/ or reflex sympathetic dystrophy/ (5486)  
112 Pain, Intractable/ (6166)  
113 Phantom Limb/ (1855)  
114 Hyperalgesia/ (11498)  
115 exp back pain/ or failed back surgery syndrome/ or low back pain/ (38351)  
116 radiculopath\*.mp. (9283)  
117 Musculoskeletal Pain/ (3090)  
118 Headache/ (27380)  
119 exp Headache Disorders/ (33884)  
120 headache\*.mp. (92254)  
121 exp Temporomandibular Joint Disorders/ (17098)  
122 whiplash.mp. (3942)  
123 Whiplash Injuries/ (3216)  
124 exp Cumulative Trauma Disorders/ (13612)  
125 exp Peripheral Nervous System Diseases/dt, rh, th [Drug Therapy, Rehabilitation, Therapy] (29519)  
126 Pain Measurement/de [Drug Effects] (6646)  
127 (backache\* or backpain\* or dorsalg\* or arthralgi\* or polyarthralgi\* or arthrodyni\* or myalgi\* or fibromyalgi\* or myodyn\* or neuralgi\* or ischialgi\* or crps or rachialgi\*).ti,ab. (44403)  
128 ((noncancer\* or non-cancer\* or back or discogen\* or chronic\* or recurrent or persist\* or bone or musculoskelet\* or muscle\* or skelet\* or spinal or spine or vertebra\* or joint\* or arthritis or Intestin\* or neuropath\* or neck or cervical\* or head or facial\* or complex or radicular or cervicobrachi\* or orofacial or somatic or non-malign\* or shoulder\* or knee\* or hip or hips) adj3 pain).mp. [mp=title, abstract, original title, name of substance word, subject heading word, floating sub-heading word, keyword heading word, organism supplementary concept word, protocol supplementary concept word, rare disease supplementary concept word, unique identifier, synonyms] (215471)  
129 or/94-128 (633956)

1  
2  
3  
4  
5 Annotation: chronic pain and painful conditions  
6 130 93 and 129 (343)  
7

8 Embase

9 Database: Embase <1974 to 2020 March 16>

10 Search Strategy:  
11 -----

12 1 cannabis/ (33753)  
13 2 exp cannabinoid/ (65425)  
14 3 medical cannabis/ (2094)  
15 4 exp cannabinoid receptor/ (14516)  
16 5 exp endocannabinoid/ (8544)  
17 6 (Cannabis or cannabiniol or cannabinoid\* or cannabidiol or bhang or cannador or charas or ganja or ganjah or hashish or hemp or marihuana or marijuana or  
18 nabilone or cesamet or cesametic or ajulemic acid or cannabichromene or cannabielsoin or cannabigerol or tetrahydrocannabinol or dronabinol or levonantradol or  
19 nabiximols or palmidrol or tetrahydrocannabinolic acid or tetrahydro cannabinol or marinol or tetranabinex or sativex or endocannabinoid\*).mp. [mp=title,  
20 abstract, heading word, drug trade name, original title, device manufacturer, drug manufacturer, device trade name, keyword, floating subheading word, candidate  
21 term word] (86218)  
22 7 cannabis addiction/ (9661)  
23 8 "cannabis use"/ or cannabis smoking/ (11097)  
24 9 (epidiolex or gwp 42003p or gwp42003p or nabidiolex or dronabinol or thc or tetrahydrocannabinol\* or ea 1477 or ea1477 or marinol or qcd 84924 or syndros  
25 or tetrabinex or tetranabinex or cesamet or nabilone or deltanyne or "abbott 40566" or namisol or dronabinolum or "QCD 84924" or "CCRIS 4726" or nabiximol? or  
26 "gw 1000" or gw1000 or "sab 378" or sab378 or sativex).mp. [mp=title, abstract, heading word, drug trade name, original title, device manufacturer, drug  
27 manufacturer, device trade name, keyword, floating subheading word, candidate term word] (19601)  
28 10 or/1-9 (89571)  
29 11 \*attitude to health/ (55489)  
30 12 \*patient participation/ (9554)  
31 13 \*patient preference/ (4523)  
32 14 preference\*.ti,ab. (180987)  
33 15 choice.ti. (36120)  
34 16 choices.ti. (7375)  
35 17 value.ti. (137715)  
36 18 health state values.ti,ab. (233)  
37  
38  
39  
40  
41  
42  
43  
44  
45  
46

1  
2  
3  
4  
5  
6  
7  
8  
9  
10  
11  
12  
13  
14  
15  
16  
17  
18  
19  
20  
21  
22  
23  
24  
25  
26  
27  
28  
29  
30  
31  
32  
33  
34  
35  
36  
37  
38  
39  
40  
41  
42  
43  
44  
45  
46

19 valuation\*.ti. (2249)  
20 expectation\*.ti,ab. (106912)  
21 attitude\*.ti,ab. (179875)  
22 acceptab\*.ti,ab. (240808)  
23 knowledge.ti,ab. (851427)  
24 point of view.ti,ab. (57170)  
25 user participation.ti,ab. (284)  
26 users participation.ti,ab. (52)  
27 patient participation.ti,ab. (2881)  
28 patients participation.ti,ab. (830)  
29 patient perspective\*.ti,ab. (5558)  
30 patients perspective\*.ti,ab. (8635)  
31 user perspective\*.ti,ab. (564)  
32 users perspective\*.ti,ab. (624)  
33 patient perce\*.ti,ab. (8096)  
34 patients perce\*.ti,ab. (14350)  
35 health perception\*.ti,ab. (3709)  
36 user perce\*.ti,ab. (400)  
37 users perce\*.ti,ab. (902)  
38 user view\*.ti,ab. (169)  
39 users view\*.ti,ab. (469)  
40 patient view\*.ti,ab. (865)  
41 patients view\*.ti,ab. (3932)  
42 ((decision\* and mak\*).ti. or (decision mak\* or decisions mak\*).ti,ab.) and (patient\* or user\* or men or women).ti,ab. (111434)  
43 discrete choice\*.ti,ab. (2789)  
44 decision board\*.ti,ab. (59)  
45 decision analy\*.ti,ab. (10602)  
46 decision-support.ti,ab. (18317)  
47 decision tool\*.ti,ab. (1271)  
48 decision aid\*.ti,ab. (4097)  
49 discrete-choice\*.ti,ab. (2789)  
50 \*Decision Making/ and (patient\* or user\* or men or women).ti. (5671)

For peer review only

- 1  
2  
3  
4  
5 51 (health and utilit\*).ti. (2083)  
6 52 gamble\*.ti,ab. (5213)  
7 53 prospect theory.ti,ab. (286)  
8 54 preference score.ti,ab. (241)  
9 55 preference elicitation.ti,ab. (261)  
10 56 health utilit\*.ti,ab. (3331)  
11 57 utility value\*.ti,ab. (2815)  
12 58 utility score\*.ti,ab. (2530)  
13 59 Utility estimate\*.ti,ab. (494)  
14 60 health state.ti,ab. (6770)  
15 61 feeling thermometer\*.ti,ab. (86)  
16 62 best-worst scaling.ti,ab. (306)  
17 63 standard gamble.ti,ab. (1081)  
18 64 time trade-off.ti,ab. (1674)  
19 65 TTO.ti,ab. (1635)  
20 66 probability trade-off.ti,ab. (24)  
21 67 utility score.ti,ab. (1024)  
22 68 preference based.ti,ab. (1839)  
23 69 preference score\*.ti,ab. (654)  
24 70 multiattribute.ti,ab. (376)  
25 71 multi attribute.ti,ab. (721)  
26 72 EuroQol 5D.ti,ab. (2064)  
27 73 EuroQol5D.ti,ab. (39)  
28 74 EQ5D.ti,ab. (1812)  
29 75 EQ 5D.ti,ab. (14809)  
30 76 SF6D.ti,ab. (110)  
31 77 SF 6D.ti,ab. (1370)  
32 78 HUI.ti,ab. (1774)  
33 79 15D.ti,ab. (2541)  
34 80 decision support system/ (21812)  
35 81 or/11-80 (1879990)  
36 82 (patient adj3 (value\* or preference\*)).ti,ab. (25871)  
37  
38  
39  
40  
41  
42  
43  
44  
45  
46

For peer review only

1  
2  
3  
4  
5  
6  
7  
8  
9  
10  
11  
12  
13  
14  
15  
16  
17  
18  
19  
20  
21  
22  
23  
24  
25  
26  
27  
28  
29  
30  
31  
32  
33  
34  
35  
36  
37  
38  
39  
40  
41  
42  
43  
44  
45  
46

83 (patient\* adj5 (report\* or relate\*) adj5 (outcome\* or measure\* or assess\*)).mp. (73476)

84 patient participation/ or doctor patient relation/ or nurse patient relationship/ or patient attitude/ or patient preference/ or patient satisfaction/ or patient compliance/ or medication compliance/ or patient decision making/ or patient education/ or chronic patient/ or attitude to health/ or \*"quality of life"/ or self care/ or self concept/ or self examination/ or adaptive behavior/ or coping behavior/ or coping.ab,ti. or needs assessment/ or personal autonomy/ or patient advocacy/ or life event/ (1037242)

85 (patient\* adj3 (prefer\* or participat\* or involve\* or perspective\* or view\* or activat\* or empower\* or collaborate)).mp. [mp=title, abstract, heading word, drug trade name, original title, device manufacturer, drug manufacturer, device trade name, keyword, floating subheading word, candidate term word] (234656)

86 (patient\* adj2 (attitude\* or decision\* or needs\*)).mp. [mp=title, abstract, heading word, drug trade name, original title, device manufacturer, drug manufacturer, device trade name, keyword, floating subheading word, candidate term word] (119435)

87 expert patient\*.mp. (478)

88 (patient\* and (centre\* or center\* or focus\*)).mp. [mp=title, abstract, heading word, drug trade name, original title, device manufacturer, drug manufacturer, device trade name, keyword, floating subheading word, candidate term word] (1258089)

89 patient decision making/ (9864)

90 patient\*.mp. and (decision making/ or medical decision making/ or cooperation/ or distress syndrome/ or emotional stress/) [mp=title, abstract, heading word, drug trade name, original title, device manufacturer, drug manufacturer, device trade name, keyword, floating subheading word, candidate term word] (180387)

91 or/82-90 (2444470)

92 81 or 91 (3858388)

93 10 and 92 (13785)

94 (chronic adj4 pain\*).mp. [mp=title, abstract, heading word, drug trade name, original title, device manufacturer, drug manufacturer, device trade name, keyword, floating subheading word, candidate term word] (113744)

95 chronic pain/ (59665)

96 exp osteoarthritis/ (124667)

97 osteoarthrit\*.mp. (138729)

98 osteo-arthrit\*.mp. (511)

99 degenerative arthrit\*.mp. (1541)

100 exp rheumatoid arthritis/ (196173)

101 exp neuralgia/ (102320)

102 diabetic neuropathy/ (23303)

103 (neuropath\* adj5 (pain or diabet\*)).mp. [mp=title, abstract, heading word, drug trade name, original title, device manufacturer, drug manufacturer, device trade name, keyword, floating subheading word, candidate term word] (72882)

104 neuralg\*.mp. (29911)

- 1  
2  
3  
4  
5 105 zoster.mp. (37512)  
6 106 irritable colon/ (25493)  
7 107 (irritable bowel syndrome or IBS).mp. [mp=title, abstract, heading word, drug trade name, original title, device manufacturer, drug manufacturer, device  
8 trade name, keyword, floating subheading word, candidate term word] (24789)  
9 108 exp migraine/ (62395)  
10 109 migrain\*.mp. (69650)  
11 110 fibromyalgia/ (19936)  
12 111 fibromyalg\*.mp. (21561)  
13 112 reflex sympathetic dystrophy.mp. (2353)  
14 113 complex regional pain syndrome.mp. (7426)  
15 114 causalgia.mp. (1039)  
16 115 intractable pain/ (4766)  
17 116 phantom limb/ or phantom pain/ (2434)  
18 117 agnosia/ (3053)  
19 118 amputation stump/ (2062)  
20 119 exp hyperalgesia/ (20518)  
21 120 ((noncancer\* or non-cancer\* or chronic\* or recurrent or persist\* or non-malign\*) adj3 pain).mp. [mp=title, abstract, heading word, drug trade name, original  
22 title, device manufacturer, drug manufacturer, device trade name, keyword, floating subheading word, candidate term word] (130063)  
23 121 exp backache/ (106576)  
24 122 radiculopathy/ or radiculopath\*.mp. (13603)  
25 123 exp bone pain/ (17842)  
26 124 exp musculoskeletal pain/ (145426)  
27 125 arthralgia/ (59500)  
28 126 headache\*.mp. (271974)  
29 127 exp "headache and facial pain"/ (296382)  
30 128 temporomandibular joint disorder/ (13611)  
31 129 ((TMJ or TMJD) and pain\*).mp. [mp=title, abstract, heading word, drug trade name, original title, device manufacturer, drug manufacturer, device trade  
32 name, keyword, floating subheading word, candidate term word] (3753)  
33 130 whiplash.mp. or whiplash injury/ (4884)  
34 131 exp cumulative trauma disorder/ (20498)  
35 132 or/94-131 (1089097)  
36 133 93 and 132 (1409)  
37  
38  
39  
40  
41  
42  
43  
44  
45  
46

1  
2  
3  
4  
5  
6  
7  
8  
9  
10  
11  
12  
13  
14  
15  
16  
17  
18  
19  
20  
21  
22  
23  
24  
25  
26  
27  
28  
29  
30  
31  
32  
33  
34  
35  
36  
37  
38  
39  
40  
41  
42  
43  
44  
45  
46

## PsycInfo

Database: APA PsycInfo &lt;1806 to March Week 2 2020&gt;

## Search Strategy:

- 
- 1 exp cannabis/ or exp cannabinoids/ or tetrahydrocannabinol/ (12784)
  - 2 (Cannabis or cannabinol or cannabinoid\* or cannabidiol or bhang or cannador or charas or ganja or ganjah or hashish or hemp or marihuana or marijuana or nabilone or cesamet or cesametic or ajulemic acid or cannabichromene or cannabielsoin or cannabigerol or tetrahydrocannabinol or dronabinol or levonantradol or nabiximols or palmidrol or tetrahydrocannabinolic acid or tetrahydro cannabinol or marinol or tetranabinex or sativex or endocannabinoid\*).mp. [mp=title, abstract, heading word, table of contents, key concepts, original title, tests & measures, mesh] (26408)
  - 3 marijuana laws/ or marijuana legalization/ or "cannabis use disorder"/ or marijuana usage/ (3594)
  - 4 (epidiolex or gwp 42003p or gwp42003p or nabidiolex or dronabinol or thc or tetrahydrocannabinol\* or ea 1477 or ea1477 or marinol or qcd 84924 or syndros or tetrabinex or tetranabinex or cesamet or nabilone or deltanyne or "abbott 40566" or namisol or dronabinolum or "QCD 84924" or "CCRIS 4726" or nabiximol? or "gw 1000" or gw1000 or "sab 378" or sab378 or sativex).mp. [mp=title, abstract, heading word, table of contents, key concepts, original title, tests & measures, mesh] (3193)
  - 5 or/1-4 (26475)
  - 6 \*health attitudes/ (8084)
  - 7 \*client participation/ (1678)
  - 8 exp \*client attitudes/ (17349)
  - 9 preference\*.ti,ab. (95876)
  - 10 choice.ti. (21402)
  - 11 choices.ti. (4602)
  - 12 value.ti. (18077)
  - 13 health state values.ti,ab. (77)
  - 14 valuation\*.ti. (983)
  - 15 expectation\*.ti,ab. (80049)
  - 16 attitude\*.ti,ab. (201050)
  - 17 acceptab\*.ti,ab. (38902)
  - 18 knowledge.ti,ab. (290890)
  - 19 point of view.ti,ab. (20482)
  - 20 user participation.ti,ab. (282)
  - 21 users participation.ti,ab. (46)

- 1  
2  
3  
4  
5 22 patient participation.ti,ab. (788)  
6 23 patients participation.ti,ab. (264)  
7 24 patient perspective\*.ti,ab. (980)  
8 25 patients perspective\*.ti,ab. (1752)  
9 26 user perspective\*.ti,ab. (340)  
10 27 users perspective\*.ti,ab. (345)  
11 28 patient perce\*.ti,ab. (1343)  
12 29 patients perce\*.ti,ab. (3398)  
13 30 health perception\*.ti,ab. (1230)  
14 31 user perce\*.ti,ab. (393)  
15 32 users perce\*.ti,ab. (888)  
16 33 user view\*.ti,ab. (95)  
17 34 users view\*.ti,ab. (289)  
18 35 patient view\*.ti,ab. (210)  
19 36 patients view\*.ti,ab. (1022)  
20 37 ((decision\* and mak\*).ti. or (decision mak\* or decisions mak\*).ti,ab.) and (patient\* or user\* or men or women).ti,ab. (21062)  
21 38 discrete choice\*.ti,ab. (960)  
22 39 decision board\*.ti,ab. (16)  
23 40 decision analy\*.ti,ab. (1133)  
24 41 decision-support.ti,ab. (3235)  
25 42 decision tool\*.ti,ab. (169)  
26 43 decision aid\*.ti,ab. (1252)  
27 44 discrete-choice\*.ti,ab. (960)  
28 45 \*Decision Making/ and (patient\* or user\* or men or women).ti. (3428)  
29 46 (health and utilit\*).ti. (467)  
30 47 gamble\*.ti,ab. (5406)  
31 48 prospect theory.ti,ab. (964)  
32 49 preference score.ti,ab. (93)  
33 50 preference elicitation.ti,ab. (134)  
34 51 health utilit\*.ti,ab. (532)  
35 52 utility value\*.ti,ab. (490)  
36 53 utility score\*.ti,ab. (334)  
37  
38  
39  
40  
41  
42  
43  
44  
45  
46



1  
2  
3  
4  
5  
6  
7  
8  
9  
10  
11  
12  
13  
14  
15  
16  
17  
18  
19  
20  
21  
22  
23  
24  
25  
26  
27  
28  
29  
30  
31  
32  
33  
34  
35  
36  
37  
38  
39  
40  
41  
42  
43  
44  
45  
46

54 Utility estimate\*.ti,ab. (103)  
55 health state.ti,ab. (958)  
56 feeling thermometer\*.ti,ab. (58)  
57 best-worst scaling.ti,ab. (109)  
58 standard gamble.ti,ab. (210)  
59 time trade-off.ti,ab. (279)  
60 TTO.ti,ab. (190)  
61 probability trade-off.ti,ab. (5)  
62 utility score.ti,ab. (101)  
63 preference based.ti,ab. (648)  
64 preference score\*.ti,ab. (402)  
65 multiattribute.ti,ab. (531)  
66 multi attribute.ti,ab. (567)  
67 EuroQol 5D.ti,ab. (206)  
68 EuroQol5D.ti,ab. (0)  
69 EQ5D.ti,ab. (61)  
70 EQ 5D.ti,ab. (1677)  
71 SF6D.ti,ab. (10)  
72 SF 6D.ti,ab. (284)  
73 HUI.ti,ab. (445)  
74 15D.ti,ab. (170)  
75 decision support systems/ (3245)  
76 or/6-75 (744950)  
77 client attitudes/ or client satisfaction/ (21785)  
78 values/ or personal values/ or social values/ (22591)  
79 (patient\* adj3 (prefer\* or participat\* or involve\* or perspective\* or view\* or activat\* or empower\* or collaborate)).mp. (27273)  
80 (patient\* adj2 (attitude\* or decision\* or needs\*)).mp. (23750)  
81 or/77-80 (85433)  
82 76 or 81 (783705)  
83 5 and 82 (3282)  
84 chronic pain/ (13151)  
85 chronic illness/ and pain.mp. (916)

For peer review only

- 1  
2  
3  
4  
5 86 back pain/ (3813)  
6 87 ((chronic\* or persist\* or refractor\* or intract\* or manag\* or back) adj3 pain).mp. (34808)  
7 88 or/84-87 (35275)  
8 89 (chronic adj4 pain\*).mp. [mp=title, abstract, heading word, table of contents, key concepts, original title, tests & measures, mesh] (22123)  
9 90 exp arthritis/ (4140)  
10 91 osteoarthrit\*.mp. [mp=title, abstract, heading word, table of contents, key concepts, original title, tests & measures, mesh] (2121)  
11 92 osteo-arthrit\*.mp. [mp=title, abstract, heading word, table of contents, key concepts, original title, tests & measures, mesh] (9)  
12 93 degenerative arthrit\*.mp. [mp=title, abstract, heading word, table of contents, key concepts, original title, tests & measures, mesh] (15)  
13 94 exp Neuralgia/ (931)  
14 95 exp Neuropathy/ (6243)  
15 96 (neuropath\* adj5 (pain or diabet\*)).mp. [mp=title, abstract, heading word, table of contents, key concepts, original title, tests & measures, mesh] (6749)  
16 97 neuralg\*.mp. [mp=title, abstract, heading word, table of contents, key concepts, original title, tests & measures, mesh] (3310)  
17 98 zoster.mp. (577)  
18 99 irritable bowel syndrome/ (1152)  
19 100 (IBS or irritable colon or irritable bowel).mp. [mp=title, abstract, heading word, table of contents, key concepts, original title, tests & measures, mesh] (2001)  
20 101 exp headache/ (15176)  
21 102 migrain\*.mp. (12832)  
22 103 fibromyalgia/ (1972)  
23 104 fibromyalg\*.mp. [mp=title, abstract, heading word, table of contents, key concepts, original title, tests & measures, mesh] (3408)  
24 105 "complex regional pain syndrome (type i)"/ (152)  
25 106 (complex regional pain syndrome\* or causalgia).mp. [mp=title, abstract, heading word, table of contents, key concepts, original title, tests & measures, mesh]  
26 (821)  
27 107 somatosensory disorders/ (1367)  
28 108 hyperalgesi\*.mp. (5320)  
29 109 exp Somatoform Disorders/ (15194)  
30 110 ((noncancer\* or non-cancer\* or chronic\* or recurrent or persist\* or non-malign\*) adj3 pain).mp. [mp=title, abstract, heading word, table of contents, key  
31 concepts, original title, tests & measures, mesh] (23779)  
32 111 radiculopath\*.mp. [mp=title, abstract, heading word, table of contents, key concepts, original title, tests & measures, mesh] (351)  
33 112 ((back or musculoskeletal) adj3 pain\*).mp. [mp=title, abstract, heading word, table of contents, key concepts, original title, tests & measures, mesh] (7604)  
34 113 arthralgia.mp. [mp=title, abstract, heading word, table of contents, key concepts, original title, tests & measures, mesh] (317)  
35 114 headache\*.mp. [mp=title, abstract, heading word, table of contents, key concepts, original title, tests & measures, mesh] (22401)  
36 115 (backache\* or backpain or dorsalg\* or arthralgi\* or polyarthralgi\* or arthrodyn\* or myalgi\* or fibromyalg\* or myodny\* or neuralg\* or ischialg\* or crps or  
37  
38  
39  
40  
41  
42  
43  
44  
45  
46

1  
2  
3  
4  
5  
6  
7  
8  
9  
10  
11  
12  
13  
14  
15  
16  
17  
18  
19  
20  
21  
22  
23  
24  
25  
26  
27  
28  
29  
30  
31  
32  
33  
34  
35  
36  
37  
38  
39  
40  
41  
42  
43  
44  
45  
46

rachialgi\*).mp. [mp=title, abstract, heading word, table of contents, key concepts, original title, tests & measures, mesh] (8315)

116 ((back or discogen\* or bone or musculosket\* or muscle\* or skelet\* or spinal or spine or vertebra\* or joint\* or arthrit\* or intestin\* or neuropath\* or neck or cervical\* or head or facial\* or complex or radicular or cervicobrach\* or orofacial or somatic or shoulder\* or knee\* or hip or hips\*) adj3 pain).mp. [mp=title, abstract, heading word, table of contents, key concepts, original title, tests & measures, mesh] (20949)

117 or/84-116 (93580)

118 83 and 117 (86)

119 5 and 82 and 117 (86)

For peer review only

**Appendix 2 Data extraction form**

|                                                                                                                                                                                                                                                                                                                                                                                                                                                                                                                                 |
|---------------------------------------------------------------------------------------------------------------------------------------------------------------------------------------------------------------------------------------------------------------------------------------------------------------------------------------------------------------------------------------------------------------------------------------------------------------------------------------------------------------------------------|
| <b>Researcher identification</b>                                                                                                                                                                                                                                                                                                                                                                                                                                                                                                |
| Surname, name                                                                                                                                                                                                                                                                                                                                                                                                                                                                                                                   |
| <b>Study identification</b>                                                                                                                                                                                                                                                                                                                                                                                                                                                                                                     |
| Study ID                                                                                                                                                                                                                                                                                                                                                                                                                                                                                                                        |
| Country                                                                                                                                                                                                                                                                                                                                                                                                                                                                                                                         |
| Funding                                                                                                                                                                                                                                                                                                                                                                                                                                                                                                                         |
| <b>Study objectives or research questions</b>                                                                                                                                                                                                                                                                                                                                                                                                                                                                                   |
| <b>Study population</b>                                                                                                                                                                                                                                                                                                                                                                                                                                                                                                         |
| Description of patients                                                                                                                                                                                                                                                                                                                                                                                                                                                                                                         |
| Response rate/ completion rate                                                                                                                                                                                                                                                                                                                                                                                                                                                                                                  |
| Male %                                                                                                                                                                                                                                                                                                                                                                                                                                                                                                                          |
| Age                                                                                                                                                                                                                                                                                                                                                                                                                                                                                                                             |
| White %                                                                                                                                                                                                                                                                                                                                                                                                                                                                                                                         |
| Chronic pain %                                                                                                                                                                                                                                                                                                                                                                                                                                                                                                                  |
| Patients ever used cannabis %                                                                                                                                                                                                                                                                                                                                                                                                                                                                                                   |
| Opioids use %                                                                                                                                                                                                                                                                                                                                                                                                                                                                                                                   |
| <b>Aim intervention</b>                                                                                                                                                                                                                                                                                                                                                                                                                                                                                                         |
| <b>Study design and methods</b>                                                                                                                                                                                                                                                                                                                                                                                                                                                                                                 |
| Study design                                                                                                                                                                                                                                                                                                                                                                                                                                                                                                                    |
| Sampling                                                                                                                                                                                                                                                                                                                                                                                                                                                                                                                        |
| Sample size                                                                                                                                                                                                                                                                                                                                                                                                                                                                                                                     |
| Data collection                                                                                                                                                                                                                                                                                                                                                                                                                                                                                                                 |
| <b>Findings</b>                                                                                                                                                                                                                                                                                                                                                                                                                                                                                                                 |
| Main findings (themes)                                                                                                                                                                                                                                                                                                                                                                                                                                                                                                          |
| <ol style="list-style-type: none"> <li>1. Values and preferences of outcome of medical cannabis <ol style="list-style-type: none"> <li>1.1 Relative value or importance patients put on outcomes of medical cannabis;</li> <li>1.2 Tradeoff between benefits and harms or burdens of medical cannabis</li> </ol> </li> <li>2. Values and preferences towards medical cannabis <ol style="list-style-type: none"> <li>2.1 Values and preference for or against medical cannabis or choosing cannabis over</li> </ol> </li> </ol> |

1  
2  
3  
4  
5  
6  
7  
8  
9  
10  
11  
12  
13  
14  
15  
16  
17  
18  
19  
20  
21  
22  
23  
24  
25  
26  
27  
28  
29  
30  
31  
32  
33  
34  
35  
36  
37  
38  
39  
40  
41  
42  
43  
44  
45  
46

|                                                                                                                                              |
|----------------------------------------------------------------------------------------------------------------------------------------------|
| other medicines                                                                                                                              |
| 2.2 Values and preferences of different preparations of medical cannabis (e.g. administration routes, ingestion method, ratio of THC to CBD) |
| 3. Factors that influence the decision making regarding medical cannabis use                                                                 |
| 3.1 Factors that influence use or not use of medical cannabis                                                                                |
| 3.2 Factors that influence the choice of medical cannabis over other meds for pain management                                                |
| 3.3 Factors that influence the choice of different preparations of medical cannabis                                                          |
| Authors' interpretation                                                                                                                      |
| Authors' conclusions                                                                                                                         |

### Appendix 3 Tool and instructions for risk of bias assessment for quantitative studies

| Domains                           | Participant selection                                                                                                                                                                                                                      | Completeness of data                                                                  | Choice of measurement instrument                                                                                                                                 | Administration of measurement instrument                                                                                           | Outcome/health state presentation                                                                                                                                                                               | Participants' understanding of the measurement instrument                                                                                     | Data analysis                                                                                                                        | Overall risk of bias                                                                                                                                                                                                                                                                   |
|-----------------------------------|--------------------------------------------------------------------------------------------------------------------------------------------------------------------------------------------------------------------------------------------|---------------------------------------------------------------------------------------|------------------------------------------------------------------------------------------------------------------------------------------------------------------|------------------------------------------------------------------------------------------------------------------------------------|-----------------------------------------------------------------------------------------------------------------------------------------------------------------------------------------------------------------|-----------------------------------------------------------------------------------------------------------------------------------------------|--------------------------------------------------------------------------------------------------------------------------------------|----------------------------------------------------------------------------------------------------------------------------------------------------------------------------------------------------------------------------------------------------------------------------------------|
| <b>Questions</b>                  | Was the study sample selected in a manner to ensure the representativeness to the target population?                                                                                                                                       | Was the attrition sufficiently low to minimize the risk of bias?                      | Was the choice of the methodology appropriate for addressing the study aim?                                                                                      | Was the instrument (or tools that was used to elicit values and preferences, e.g. questionnaire) administered in the intended way? | Was a valid representation of the outcome/health state (e.g. a state of pain relief - a beneficial outcome of medical cannabis, or an experience of coughing - a harmful outcome of medical cannabis) utilized? | Did the researchers check the understanding to the measurement techniques (e.g. questionnaire in a survey)?                                   | Were the results analyzed appropriately?                                                                                             |                                                                                                                                                                                                                                                                                        |
| <b>Instructions for questions</b> | The sampling strategy solely does not determine the risk of bias; if there is a subset of the population more or less likely to be reached, the answer for "was the study sample selected in a manner to ensure the representativeness" is | Response rate for 80% or higher would be considered high for a cross-sectional study. | Consider yes or probably yes for the following methodologies: standard gamble, time trade off, visual analogue scale (or feeling thermometers), discrete choice, | -                                                                                                                                  | If the researchers demonstrated they were using available evidence to support the health state presentation, the answer should be yes or probably yes.                                                          | If the methodology is simple, choosing "the investigators did not formally test the understanding, but the results suggested it was adequate" | To answer this question, reviewers also need to consider whether the adjustment, stratification, or model selection was appropriate. | <ul style="list-style-type: none"> <li>· Low risk of bias= The study is classified as with low risk of bias across subdomains.</li> <li>· Moderate risk of bias= The study is classified as low (Yes -&gt; low risk of bias) or moderate (Probably yes -&gt; moderate risk)</li> </ul> |

1  
2  
3  
4  
5  
6  
7  
8  
9  
10  
11  
12  
13  
14  
15  
16  
17  
18  
19  
20  
21  
22  
23  
24  
25  
26  
27  
28  
29  
30  
31  
32  
33  
34  
35  
36  
37  
38  
39  
40  
41  
42  
43  
44  
45  
46

yes or probably yes.

treatment  
trade-off,  
willingness to  
pay

could be  
appropriate.  
If the  
researchers  
piloted the  
methodology,  
choosing "the  
investigators  
did not formally  
test the  
understanding,  
but the results  
suggested it  
was adequate"  
may also be  
appropriate.

This domain  
may not be  
applicable to  
all primary  
studies  
because not  
all studies will  
require  
controlled  
data analysis.  
Please check  
"NA" if not  
applicable.

of bias) risk of bias  
across subdomains.  
· Serious risk of  
bias= The study is  
classified as serious  
risk of bias (Probably  
no -> serious risk of  
bias) for at least one  
subdomain but not  
classified as critical  
risk of bias for any  
subdomain.  
· Critical risk of  
bias=The study is  
classified as critical  
risk of bias (No ->  
critical risk of bias)  
for at least one  
subdomain.

For peer review only

**Appendix 4 Tool and instructions for methodological limitation assessments for qualitative studies**

| Domains                           | Aim of the research                                                                      | Qualitative methodology appropriateness                                                                                                                                                                   | Research design                                                                                                       | Appropriate recruitment strategy                                                                                                             | Data collection                                                                                                                                                        | Investigator-participant relationship                                                                                                                                       | Ethical issues                                                                                                                                                                                                         | Data analysis                                                                                                                                                                                                                        | Findings                                                                                                                           | Value of the research                                                                                                                                                                                                                            | Overall methodological limitations                                                                                                            |
|-----------------------------------|------------------------------------------------------------------------------------------|-----------------------------------------------------------------------------------------------------------------------------------------------------------------------------------------------------------|-----------------------------------------------------------------------------------------------------------------------|----------------------------------------------------------------------------------------------------------------------------------------------|------------------------------------------------------------------------------------------------------------------------------------------------------------------------|-----------------------------------------------------------------------------------------------------------------------------------------------------------------------------|------------------------------------------------------------------------------------------------------------------------------------------------------------------------------------------------------------------------|--------------------------------------------------------------------------------------------------------------------------------------------------------------------------------------------------------------------------------------|------------------------------------------------------------------------------------------------------------------------------------|--------------------------------------------------------------------------------------------------------------------------------------------------------------------------------------------------------------------------------------------------|-----------------------------------------------------------------------------------------------------------------------------------------------|
| <b>Questions</b>                  | Was there a clear statement of the aims of the research?                                 | Is a qualitative methodology appropriate?                                                                                                                                                                 | Was the research design appropriate to address the aims of the research?                                              | Was the recruitment strategy appropriate to the aims of the research?                                                                        | Was the data collected in a way that addressed the research issue?                                                                                                     | Has the relationship between researcher and participants been adequately considered?                                                                                        | Have ethical issues been taken into consideration?                                                                                                                                                                     | Was the data analysis sufficiently rigorous?                                                                                                                                                                                         | Is there a clear statement of findings?                                                                                            | How valuable is the research?                                                                                                                                                                                                                    |                                                                                                                                               |
| <b>Instructions for questions</b> | · what was the goal of the research<br>· why it was thought important<br>· its relevance | · If the research seeks to interpret or illuminate the actions and/or subjective experiences of research participants<br>· Is qualitative research the right methodology for addressing the research goal | · if the researcher has justified the research design (e.g. have they discussed how they decided which method to use) | · If the researcher has explained how the participants were selected why the participants they selected were the most appropriate to provide | · If the setting for the data collection was justified<br>· If it is clear how data were collected<br>· If the researcher has justified the methods chosen<br>· If the | · If the researcher critically examined their own role, potential bias and influence during (a) formulation of the research questions (b) data collection, including sample | · If there are sufficient details of how the research was explained to participants for the reader to assess whether ethical standards were maintained<br>· If the researcher has discussed issues raised by the study | · If there is an in-depth description of the analysis process<br>· If thematic analysis is used. If so, is it clear how the categories/themes were derived from the data<br>· Whether the researcher explains how the data presented | · If the findings are explicit<br>· If there is adequate discussion of the evidence both for and against the researcher's argument | · If the researcher discusses the contribution the study makes to existing knowledge or understanding (e.g. do they consider the findings in relation to current practice or policy, or relevant research-based literature<br>· If they identify | · Serious = if more than 2 questions had "No".<br>· Moderate = if 2 questions had "No".<br>· No or minor = if less than 2 questions had "No". |



1  
2  
3  
4  
5  
6  
7  
8  
9  
10  
11  
12  
13  
14  
15  
16  
17  
18  
19  
20  
21  
22  
23  
24  
25  
26  
27  
28  
29  
30  
31  
32  
33  
34

access to researcher recruitment (e.g. issues were selected · If the new areas where  
the type of has made and choice around from the researcher research is  
knowledge the of location informed original has necessary  
sought by methods · How the consent or sample to discussed · If the research is  
the study explicit researcher confidentiality demonstrate the researchers have  
· If there · If responded or how they the analysis credibility discussed  
are any methods to events have handled process of their whether or how  
discussions were during the study and the effects of · If sufficient findings the findings can  
around modified study and whether the the study on data are · If the be transferred to  
recruitment during the they participants support the findings are populations or  
(e.g. why so, has the considered during and findings discussed considered other  
some researcher the implications study) after the · To what in relation ways the  
people chose not explained of any · If approval contradictory original research may be  
to take how and changes in has been data are taken original used  
part) why the research sought from into account research question  
· If the form of data is clear · Whether the researcher  
· If the researcher own role, examined their  
has discussed potential bias and influence  
saturation during analysis and selection  
of data and selection of data for  
presentation

45  
46

## Appendix 5 Characteristics of the included studies

| Study ID     | Country       | Funding sources      | Primary focus                                                                                                                 | Study design                          | Data collection methods              | Sampling    | Participants, n | Male Sex, % | Chronic pain, % | Chronic cancer pain, % | Prior use of cannabis, % | Risk of Bias/ Methodological Limitations |
|--------------|---------------|----------------------|-------------------------------------------------------------------------------------------------------------------------------|---------------------------------------|--------------------------------------|-------------|-----------------|-------------|-----------------|------------------------|--------------------------|------------------------------------------|
| Bigand 2019  | United States | Non-industry funding | To examine the perceived effects of medical cannabis among patients who are prescribed opioids for persistent pain conditions | Qualitative, Descriptive              | Questionnaire                        | Convenience | 150             | 31.3        | 100             | NR                     | 69.3                     | Serious                                  |
| Boehnke 2019 | United States | NR                   | To assess preferences towards medical cannabis products among medical cannabis users with chronic pain                        | Quantitative, Cross-sectional         | Questionnaire                        | Convenience | 1321            | 40.9        | NR <sup>a</sup> | NR                     | 100                      | Moderate                                 |
| Bruce 2018   | United States | Non-industry funding | To assess approaches to medical cannabis use vis-a-vis prescription medications among patients with chronic conditions        | Qualitative, Descriptive              | Semi-structured telephone interviews | Convenience | 30              | 60.3        | NR <sup>b</sup> | NR                     | 100                      | No or minor                              |
| Cooke 2019   | United States | Non-industry funding | To explore perspectives on the co-use of medical cannabis and opioids among clinicians, and                                   | Qualitative, Modified grounded theory | Semi-structured in-person interviews | Purposive   | 46              | 45.6        | 100             | 0                      | 45.7 <sup>c</sup>        | Moderate                                 |

1  
2  
3  
4  
5 patients with both  
6 chronic non-cancer  
7 pain and a history of  
8 substance use

|                         |                   |                             |                                                                                                                                                                                                                                                   |                                      |                                                   |             |      |      |                 |                  |      |          |
|-------------------------|-------------------|-----------------------------|---------------------------------------------------------------------------------------------------------------------------------------------------------------------------------------------------------------------------------------------------|--------------------------------------|---------------------------------------------------|-------------|------|------|-----------------|------------------|------|----------|
| 9 Degenhard<br>10t 2015 | Australia         | Non-<br>industry<br>funding | To investigate<br>patterns and<br>correlates of medical<br>cannabis use among<br>patients who are<br>prescribed opioids for<br>chronic non-cancer<br>pain                                                                                         | Quantitative,<br>Cross-<br>sectional | Questionn<br>aire, and<br>diagnostic<br>interview | Purposive   | 1514 | 44.4 | 100             | 0                | 43   | Moderate |
| 17 Gallagher<br>182003  | Canada            | NR                          | To survey willingness<br>to try medical<br>cannabis among<br>patients with a known<br>advanced life-limiting<br>illness <sup>d</sup> , and to assess<br>this population's<br>knowledge about<br>medical cannabis                                  | Quantitative,<br>Cross-<br>sectional | Discrete<br>choice,<br>VAS, Likert<br>scales      | Purposive   | 68   | 44.6 | NR <sup>e</sup> | 100 <sup>d</sup> | 35.3 | Critical |
| 27 Gill 2001            | United<br>Kingdom | NR                          | To investigate beliefs<br>about cannabinoids<br>and the associations<br>between those<br>beliefs, beliefs about<br>medication, and<br>personal and pain<br>variables in relation to<br>willingness to try<br>cannabinoids as<br>analgesics, among | Quantitative,<br>Cross-<br>sectional | Questionn<br>aire                                 | Convenience | 65   | 45   | 100             | NR               | NR   | Serious  |

11  
12  
13  
14  
15  
16  
19  
20  
21  
22  
23  
24  
25  
26  
30  
31  
32  
33  
34  
35  
36  
37  
38  
39  
40  
41  
42  
43  
44  
45  
46

1  
2  
3  
4  
5  
6  
7  
8  
9  
10  
11  
12  
13  
14  
15  
16  
17  
18  
19  
20  
21  
22  
23  
24  
25  
26  
27  
28  
29  
30  
31  
32  
33  
34  
35  
36  
37  
38  
39  
40  
41  
42  
43  
44  
45  
46

patients with chronic pain who had interest in trying medical cannabis as an analgesic

To assess beliefs regarding using marijuana for medicine, post injury pain and speaking about marijuana to their health care providers, among patients who have a musculoskeletal injury in the last 1-6 months.

To explore and characterize the experience of using medical cannabis for chronic pain among patients receiving medical cannabis for at least three months

To evaluate the safety and tolerability of three CBMEs among patients with stable chronic pain, and poorly responsive to other modalities

For peer review only

|                  |                |                      |                               |                                      |             |     |      |                 |     |     |             |
|------------------|----------------|----------------------|-------------------------------|--------------------------------------|-------------|-----|------|-----------------|-----|-----|-------------|
| Heng 2018        | United States  | NR                   | Quantitative, Cross-sectional | Questionnaire                        | Convenience | 500 | 50   | NR <sup>f</sup> | NR  | 60  | Moderate    |
| Lavie-Ajayi 2019 | Israel         | Non-industry funding | Qualitative, Phenomenological | Semi-structured in-person interviews | Purposive   | 19  | 52.6 | 100             | 5.3 | 100 | No or minor |
| Notcutt 2004     | United Kingdom | Non-industry funding | Quantitative, RCT             | NR                                   | Convenience | 34  | 32   | 100             | NR  | NR  | Moderate    |

|    |                    |               |                      |                                                                                                                                                                   |                                |                                                      |                          |      |      |                  |      |     |          |
|----|--------------------|---------------|----------------------|-------------------------------------------------------------------------------------------------------------------------------------------------------------------|--------------------------------|------------------------------------------------------|--------------------------|------|------|------------------|------|-----|----------|
| 1  |                    |               |                      |                                                                                                                                                                   |                                |                                                      |                          |      |      |                  |      |     |          |
| 2  |                    |               |                      |                                                                                                                                                                   |                                |                                                      |                          |      |      |                  |      |     |          |
| 3  |                    |               |                      |                                                                                                                                                                   |                                |                                                      |                          |      |      |                  |      |     |          |
| 4  |                    |               |                      |                                                                                                                                                                   |                                |                                                      |                          |      |      |                  |      |     |          |
| 5  | Piper 2017         | United States | Non-industry funding | To survey perspectives of medical cannabis among legal members of medical cannabis dispensaries, and to examine the strengths and limitations of medical cannabis | Mixed Methods, Cross-sectional | Online survey, discrete choice, open-ended questions | Convenience and snowball | 984  | 47.1 | 100 <sup>g</sup> | 16.7 | 100 | Serious  |
| 6  |                    |               |                      |                                                                                                                                                                   |                                |                                                      |                          |      |      |                  |      |     |          |
| 7  |                    |               |                      |                                                                                                                                                                   |                                |                                                      |                          |      |      |                  |      |     |          |
| 8  |                    |               |                      |                                                                                                                                                                   |                                |                                                      |                          |      |      |                  |      |     |          |
| 9  |                    |               |                      |                                                                                                                                                                   |                                |                                                      |                          |      |      |                  |      |     |          |
| 10 |                    |               |                      |                                                                                                                                                                   |                                |                                                      |                          |      |      |                  |      |     |          |
| 11 |                    |               |                      |                                                                                                                                                                   |                                |                                                      |                          |      |      |                  |      |     |          |
| 12 |                    |               |                      |                                                                                                                                                                   |                                |                                                      |                          |      |      |                  |      |     |          |
| 13 |                    |               |                      |                                                                                                                                                                   |                                |                                                      |                          |      |      |                  |      |     |          |
| 14 | Rochford 2019      | Ireland       | NR                   | To evaluate attitudes towards medicinal cannabis among patients who attend chronic pain clinics                                                                   | Quantitative, Cross-sectional  | Questionnaire                                        | Convenience              | 96   | 39.6 | 100              | 22.9 | NR  | Serious  |
| 15 |                    |               |                      |                                                                                                                                                                   |                                |                                                      |                          |      |      |                  |      |     |          |
| 16 |                    |               |                      |                                                                                                                                                                   |                                |                                                      |                          |      |      |                  |      |     |          |
| 17 |                    |               |                      |                                                                                                                                                                   |                                |                                                      |                          |      |      |                  |      |     |          |
| 18 |                    |               |                      |                                                                                                                                                                   |                                |                                                      |                          |      |      |                  |      |     |          |
| 19 |                    |               |                      |                                                                                                                                                                   |                                |                                                      |                          |      |      |                  |      |     |          |
| 20 | Satterlund 2015    | United States | Non-industry funding | To assess perceived risk, concern or overall stigma of marijuana use, and how this stigma may affect the health care among medical marijuana users <sup>c</sup>   | Qualitative, Descriptive       | Semi-structured interviews                           | Convenience and snowball | 18   | 72   | NR <sup>h</sup>  | NR   | 100 | Moderate |
| 21 |                    |               |                      |                                                                                                                                                                   |                                |                                                      |                          |      |      |                  |      |     |          |
| 22 |                    |               |                      |                                                                                                                                                                   |                                |                                                      |                          |      |      |                  |      |     |          |
| 23 |                    |               |                      |                                                                                                                                                                   |                                |                                                      |                          |      |      |                  |      |     |          |
| 24 |                    |               |                      |                                                                                                                                                                   |                                |                                                      |                          |      |      |                  |      |     |          |
| 25 |                    |               |                      |                                                                                                                                                                   |                                |                                                      |                          |      |      |                  |      |     |          |
| 26 |                    |               |                      |                                                                                                                                                                   |                                |                                                      |                          |      |      |                  |      |     |          |
| 27 |                    |               |                      |                                                                                                                                                                   |                                |                                                      |                          |      |      |                  |      |     |          |
| 28 | Sexton 2016        | United States | Non-industry funding | To survey the patterns of use and perceived efficacy of medical cannabis among patients who have used medical cannabis in the last 90 days                        | Quantitative, Cross-sectional  | Questionnaire                                        | Convenience              | 1429 | 54.6 | NR <sup>i</sup>  | NR   | 100 | Moderate |
| 29 |                    |               |                      |                                                                                                                                                                   |                                |                                                      |                          |      |      |                  |      |     |          |
| 30 |                    |               |                      |                                                                                                                                                                   |                                |                                                      |                          |      |      |                  |      |     |          |
| 31 |                    |               |                      |                                                                                                                                                                   |                                |                                                      |                          |      |      |                  |      |     |          |
| 32 |                    |               |                      |                                                                                                                                                                   |                                |                                                      |                          |      |      |                  |      |     |          |
| 33 |                    |               |                      |                                                                                                                                                                   |                                |                                                      |                          |      |      |                  |      |     |          |
| 34 |                    |               |                      |                                                                                                                                                                   |                                |                                                      |                          |      |      |                  |      |     |          |
| 35 |                    |               |                      |                                                                                                                                                                   |                                |                                                      |                          |      |      |                  |      |     |          |
| 36 |                    |               |                      |                                                                                                                                                                   |                                |                                                      |                          |      |      |                  |      |     |          |
| 37 | Zarrabi/Singh 2019 | United States | Non-industry         | To survey perceptions of the benefits and                                                                                                                         | Quantitative, Cross-           | Questionnaire                                        | Convenience              | 101  | 55.7 | 100              | 75.5 | 100 | Serious  |
| 38 |                    |               |                      |                                                                                                                                                                   |                                |                                                      |                          |      |      |                  |      |     |          |
| 39 |                    |               |                      |                                                                                                                                                                   |                                |                                                      |                          |      |      |                  |      |     |          |
| 40 |                    |               |                      |                                                                                                                                                                   |                                |                                                      |                          |      |      |                  |      |     |          |
| 41 |                    |               |                      |                                                                                                                                                                   |                                |                                                      |                          |      |      |                  |      |     |          |
| 42 |                    |               |                      |                                                                                                                                                                   |                                |                                                      |                          |      |      |                  |      |     |          |
| 43 |                    |               |                      |                                                                                                                                                                   |                                |                                                      |                          |      |      |                  |      |     |          |
| 44 |                    |               |                      |                                                                                                                                                                   |                                |                                                      |                          |      |      |                  |      |     |          |
| 45 |                    |               |                      |                                                                                                                                                                   |                                |                                                      |                          |      |      |                  |      |     |          |
| 46 |                    |               |                      |                                                                                                                                                                   |                                |                                                      |                          |      |      |                  |      |     |          |

1  
2  
3  
4 funding harms of medical sectional  
5 cannabis, concerns  
6 about access to  
7 cannabis, and  
8 perceptions of  
9 support from family  
10 and health care  
11 providers, among  
12 patients with serious  
13 illness in APC  
14

---

**Note:**

16 Abbreviation: APC: ambulatory palliative care, CBMEs: cannabis based medicinal extracts, CNCP: chronic non-cancer pain, NR: Not reported, RCT: Randomized  
17 controlled trial, US: United states, VAS: Visual Analogue Scale.  
18

19  
20 a Chronic overlapping pain conditions: back pain 58%, migraine 21%, fibromyalgia 15%, irritable bowel disease or Crohn's disease 14%, temporomandibular joint  
21 disorder 6%.

22 b Rheumatoid arthritis 23.3%, spinal cord disease or injury 20%, Chron's disease 20%, cancer 13.3%, hepatitis C 13.3%, post-traumatic stress disorder (PTSD) 13.3%,  
23 severe fibromyalgia 10%, other (chronic regional pain syndrome, epilepsy, HIV, MS, Parkinson's) 23.3%.

24 c Majority ( $\geq 80\%$ ) were patients with chronic and severe pain.

25 d Advanced life-limiting illnesses include malignancy, advanced cardiac, respiratory, liver or neurological diseases.

26 e The mean score of intensity of pain was 4.9 on a 0 to 10 VAS scale (0= absence of pain, 10=the worst pain intensity imaginable).

27 f Patients had experienced a musculoskeletal injury between 1 to 6 months before entry into the study.

28 g All the participants were legal members of medical cannabis dispensaries in the north-eastern US. Sixty-four percent of patients reported that they had been  
29 diagnosed with chronic pain by a medical professional.

30 h The authors stated "Maladies for which respondents used medical marijuana included migraine headaches, depression, chemotherapy and radiation treatment  
31 effects, chronic pain, and asthma, with the majority citing chronic and severe pain".  
32

33 i Sixty-one percent of patients reported chronic pain, 35.5% had headache/migraine and the remaining 3.5% had other chronic pain conditions.  
34  
35  
36  
37  
38  
39  
40  
41  
42  
43  
44  
45  
46

1  
2  
3  
4  
5  
6  
7  
8  
9  
10  
11  
12  
13  
14  
15  
16  
17  
18  
19  
20  
21  
22  
23  
24  
25  
26  
27  
28  
29  
30  
31  
32  
33  
34  
35  
36  
37  
38  
39  
40  
41  
42  
43  
44  
45  
46

**Appendix 6 Excluded studies and reasons for exclusion in full text screening**

| <b>Study ID</b>        | <b>Reason for exclusion</b> |
|------------------------|-----------------------------|
| 1. Aggarwal 2014       | Not value and preference    |
| 2. Allan 2018          | Not value and preference    |
| 3. Bekker 2018         | Not value and preference    |
| 4. Cairns 2017         | Not value and preference    |
| 5. Caplan B 2018       | Not value and preference    |
| 6. Choo 2016           | Not value and preference    |
| 7. Nickel 2018         | Not value and preference    |
| 8. Djulus 2005         | Not value and preference    |
| 9. Dowden 2019         | Not value and preference    |
| 10. Gieringer 2003     | Not value and preference    |
| 11. Harrison 2013      | Not value and preference    |
| 12. Kepple 2016        | Not value and preference    |
| 13. Kinnucan 2018      | Not value and preference    |
| 14. Bachhuber 2018     | Not value and preference    |
| 15. Zolotov 2016       | Not value and preference    |
| 16. Lum 2019           | Not value and preference    |
| 17. Martins-Welch 2017 | Not value and preference    |
| 18. Naguib 2015        | Not value and preference    |
| 19. Page 2015          | Not value and preference    |
| 20. Parmar 2016        | Not value and preference    |
| 21. Paut Kusturica2019 | Not value and preference    |
| 22. Pearce 2014        | Not value and preference    |
| 23. Pink 2012          | Not value and preference    |
| 24. Piper 2018         | Not value and preference    |
| 25. Reid 2013          | Not value and preference    |
| 26. Reiman 2008        | Not value and preference    |
| 27. Reisfield 2009     | Not value and preference    |
| 28. Reynolds 2017      | Not value and preference    |
| 29. Reynolds 2018      | Not value and preference    |
| 30. Ste-Marie 2015     | Not value and preference    |

|    |                            |                          |
|----|----------------------------|--------------------------|
| 1  |                            |                          |
| 2  |                            |                          |
| 3  |                            |                          |
| 4  |                            |                          |
| 5  | 31. Sutherland 2016        | Not value and preference |
| 6  | 32. Teigen 2019            | Not value and preference |
| 7  | 33. Toth 2015              | Not value and preference |
| 8  | 34. Volkow 2017            | Not value and preference |
| 9  | 35. Wallace 2015           | Not value and preference |
| 10 | 36. Wan 2017               | Not value and preference |
| 11 | 37. Ware 2010              | Not value and preference |
| 12 | 38. Wilsey 2015            | Not value and preference |
| 13 | 39. Winston-McPherson 2019 | Not value and preference |
| 14 | 40. Zaller 2015            | Not value and preference |
| 15 | 41. Ziadni 2018            | Not value and preference |
| 16 | 42. Zvolensky 2011         | Not value and preference |
| 17 | 43. Aggarwal 2018          | Abstract only            |
| 18 | 44. Agornyo 2018           | Abstract only            |
| 19 | 45. Bar-Sela 2014          | Abstract only            |
| 20 | 46. Berg 2017              | Abstract only            |
| 21 | 47. Burks 2016             | Abstract only            |
| 22 | 48. Calvino 2017           | Abstract only            |
| 23 | 49. Cofield 2015           | Abstract only            |
| 24 | 49. Cofield 2015           | Abstract only            |
| 25 | 50. Fitzcharles 2019       | Abstract only            |
| 26 | 51. Galvin 2018            | Abstract only            |
| 27 | 52. Gavigan 2019           | Abstract only            |
| 28 | 53. Grella 2015            | Abstract only            |
| 29 | 54. Gustavsen 2018         | Abstract only            |
| 30 | 55. Kiszko 2017            | Abstract only            |
| 31 | 56. Lee 2012               | Abstract only            |
| 32 | 57. Mitra 2019             | Abstract only            |
| 33 | 58. Muirhead 2015          | Abstract only            |
| 34 | 59. Pires 2018             | Abstract only            |
| 35 | 60. Rhyne 2019             | Abstract only            |
| 36 | 61. Sabet 2014             | Abstract only            |
| 37 | 61. Sabet 2014             | Abstract only            |
| 38 | 62. Schnelle 1999          | Abstract only            |
| 39 |                            |                          |
| 40 |                            |                          |
| 41 |                            |                          |
| 42 |                            |                          |
| 43 |                            |                          |
| 44 |                            |                          |
| 45 |                            |                          |
| 46 |                            |                          |



1  
2  
3  
4  
5  
6  
7  
8  
9  
10  
11  
12  
13  
14  
15  
16  
17  
18  
19  
20  
21  
22  
23  
24  
25  
26  
27  
28  
29  
30  
31  
32  
33  
34  
35  
36  
37  
38  
39  
40  
41  
42  
43  
44  
45  
46

|                          |                                                                      |
|--------------------------|----------------------------------------------------------------------|
| 63. Wurtzen 2018         | Abstract only                                                        |
| 64. Grinberg 2018        | Not patients with chronic pain or their carer                        |
| 65. Iskedjian 2009       | Not patients with chronic pain or their carer                        |
| 66. Grotenhermen 2003    | Not patients with chronic pain or their carer                        |
| 67. LAU 2015             | Not patients with chronic pain or their carer                        |
| 68. Ishida 2019          | Not patients with chronic pain or their carer                        |
| 69. Lucas 2019           | Not patients with chronic pain or their carer                        |
| 70. Wan 2017             | Not patients with chronic pain or their carer                        |
| 71. Mendoza 2016         | Not patients with chronic pain or their carer                        |
| 72. Mendoza 2018         | Not patients with chronic pain or their carer                        |
| 73. Schenker 2019        | Not patients with chronic pain or their carer                        |
| 74. Sharon 2018          | Not patients with chronic pain or their carer                        |
| 75. St-Amant 2015        | Not patients with chronic pain or their carer                        |
| 76. Starrels 2018        | Not patients with chronic pain or their carer                        |
| 77. Starrels 2020        | Not patients with chronic pain or their carer                        |
| 78. Zolotov 2019         | Not patients with chronic pain or their carer                        |
| 79. Zolotov 2019         | Not patients with chronic pain or their carer                        |
| 80. Nouryan 2018         | Not patients with chronic pain or their carer                        |
| 81. Boehnke 2019         | Not patients with chronic pain or their carer                        |
| 82. Khelemsky 2017       | Not patients with chronic pain or their carer                        |
| 83. Vargas-Schaffer 2018 | Not cannabis                                                         |
| 84. Manchikanti 2008     | Not cannabis                                                         |
| 85. Mijatovic 2019       | Not cannabis                                                         |
| 86. Friedberg 2016       | Personal experience                                                  |
| 87. Greenberg 2019       | Personal experience                                                  |
| 88. Burke 2010           | Value and preference data not elicited from patients or their carers |

---

**List of excluded studies at full text screening and reasons for exclusion****1. Not value and preference (n=42)**

1. Aggarwal SK, Pangarkar S, Carter GT, Tribuzio B, Miedema M, Kennedy DJ. Medical marijuana for failed back surgical syndrome: A viable option for pain control or an uncontrolled narcotic? *PM and R*. 2014; 6: 363-72.
2. Allan GM, Ramji J, Perry D, Ton J, Beahm NP, Crisp N, et al. Simplified guideline for prescribing medical cannabinoids in primary care. *Can Fam Physician*. 2018; 64: 111-20.
3. Bekker A. Cannabis use and non-cancer chronic pain. *The Lancet Public Health*. 2018;3:e468.
4. Cairns EA, Kelly MEM. Why support a separate medical access framework for cannabis? *Cmaj*. 2017; 189: E927-E8.
5. Caulley L. Medical marijuana for chronic pain. *New England Journal of Medicine*. 2018; 379: 1575-7.
6. Choo EK, Ewing SWF, Lovejoy TI. Opioids Out, Cannabis in negotiating the unknowns in patient care for chronic pain. *JAMA - Journal of the American Medical Association*. 2016; 316: 1763-4.
7. Curtis Nickel J. Medical marijuana for urologic chronic pelvic pain. *Canadian Urological Association Journal*. 2018; 12: S181-S3.
8. Djulus J, Moretti M, Koren G. Motherisk update: Marijuana use and breastfeeding. *Can Fam Physician*. 2005; 51: 349-50.
9. Dowden A. Barriers to prescribing cannabis-based medicines. *Prescriber*. 2019; 30: 17-21.
10. Gieringer DH. The acceptance of medicinal marijuana in the U.S. *Journal of Cannabis Therapeutics*. 2003; 3: 53-65.
11. Harrison TE, Bruce BK, Weiss KE, Rummans TA, Bostwick JM. Marijuana and chronic nonmalignant pain in adolescents. *Mayo Clinic proceedings*. 2013; 88: 647-50.
12. Kepple NJ, Mulholland E, Freisthler B, Schaper E. Correlates of Amount Spent on Marijuana Buds During a Discrete Purchase at Medical Marijuana Dispensaries: Results from a Pilot Study. *Journal of Psychoactive Drugs*. 2016; 48: 50-5.
13. Kinnucan J. Use of medical cannabis in patients with inflammatory bowel disease. *Gastroenterology and Hepatology*. 2018; 14: 598-601.
14. Bachhuber MA, Arnsten JH, Starrels JL, Cunningham CO. Willingness to Participate in Longitudinal Research Among People with Chronic Pain Who Take Medical Cannabis: A Cross-Sectional Survey. *Cannabis and Cannabinoid Research*. 2018; 3: 45-53.

- 1
- 2
- 3
- 4
- 5 15. Zolotov Y, Baruch Y, Reuveni H, Magnezi R. Adherence to Medical Cannabis among Licensed Patients in Israel. *Cannabis and Cannabinoid Research*. 2016;1:16-21.
- 6
- 7
- 8 16. Lum HD. Medical Cannabis in Palliative Care: Meaningful Additions to the Research Evidence. *Journal of Palliative Medicine*. 2019;22:1173-4.
- 9
- 10 17. Martins-Welch D, Nouryan C, Kline M, Modayil S. Health providers' perspectives on medical marijuana use. *Journal of Clinical Oncology*. 2017;35 (31 Supplement 1):235.
- 11
- 12 18. Naguib M, Foss JF. Medical use of marijuana: Truth in evidence. *Anesthesia and Analgesia*. 2015;121:1124-7.
- 13
- 14 19. Page J, Ware M. Close the knowledge gap. *Nature*. 2015;525:S9.
- 15
- 16 20. Parmar JR, Forrest BD, Freeman RA. Medical marijuana patient counseling points for health care professionals based on trends in the medical uses, efficacy, and adverse effects of cannabis-based pharmaceutical drugs. *Res Social Adm Pharm*. 2016;12:638-54.
- 17
- 18 21. Paut Kusturica M, Tomas A, Sabo A, Tomic Z, Horvat O. Medical cannabis: Knowledge and attitudes of prospective doctors in Serbia. *Saudi Pharmaceutical Journal*. 2019;27:320-5.
- 19
- 20
- 21 22. Pearce DD, Mitsouras K, Irizarry KJ. Discriminating the effects of Cannabis sativa and Cannabis indica: a web survey of medical cannabis users. *J Altern Complement Med*. 2014;20:787-91.
- 22
- 23
- 24 23. Pink LR, Smith AJ, Peng PWH, Galonski MJ, Tumber PS, Evans D, et al. Intake assessment of problematic use of medications in a chronic noncancer pain clinic. *Pain Research and Management*. 2012;17:276-80.
- 25
- 26
- 27 24. Piper BJ. Mother of Berries, ACDC, or Chocolepe: Examination of the Strains Used by Medical Cannabis Patients in New England. *Journal of Psychoactive Drugs*. 2018;50:95-104.
- 28
- 29
- 30 25. Reid A. Medical marihuana: More knowledge and clinical guidance needed. *CJAM Canadian Journal of Addiction Medicine*. 2013;4:21-2.
- 31
- 32 26. Reiman AE. Self-efficacy, social support and service integration at medical cannabis facilities in the San Francisco Bay area of California. *Health Soc Care Community*. 2008;16:31-41.
- 33
- 34 27. Reisfield GM, Wasan AD, Jamison RN. The prevalence and significance of cannabis use in patients prescribed chronic opioid therapy: A review of the extant literature. *Pain Medicine*. 2009;10:1434-41.
- 35
- 36
- 37 28. Reynolds I, Fixen D, Parnes B, Lum H, Church S, Linnebur SA, et al. Attitudes, characteristics, and patterns of Marijuana use in older adults in two outpatient geriatric clinics in Colorado. *Journal of the American Geriatrics Society*. 2017;65 (Supplement 1):S102.
- 38
- 39
- 40
- 41
- 42
- 43
- 44
- 45
- 46

- 1
- 2
- 3
- 4
- 5 29. Reynolds IR, Fixen DR, Parnes BL, Lum HD, Shanbhag P, Church S, et al. Characteristics and Patterns of Marijuana Use in Community-Dwelling Older Adults. *Journal of the American Geriatrics Society*. 2018;66:2167-71.
- 6
- 7
- 8 30. Ste-Marie P, Shir Y, Rampakakis E, Sampalis J, Cohen M, Starr M, et al. Profile of rheumatology patients using medical marijuana. *Journal of Rheumatology*. 2015;42 (7):1320.
- 9
- 10 31. Sutherland AM, Nicholls J, Clarke H. Medical cannabis: The pain physician's perspective. *Journal of Pain Management*. 2016;9:465-72.
- 11
- 12 32. Teigen IA, Serkland TT, Pahr T, Berg JA. Should more patients be offered treatment with cannabinoids? *Tidsskrift for Den Norske Laegeforening*. 2019;139:24.
- 13
- 14 33. Toth A, Possidente C, Sawyer L, DiParlo M, Fanciullo G. An evaluation of new England and national opioid prescribing trends during 2013-2014. *Regional Anesthesia and Pain Medicine Conference: 14th Annual Pain Medicine Meeting of the American Society of Regional Anesthesia and Pain Medicine, ASRA*. 2015;41.
- 15
- 16
- 17 34. Volkow ND, Collins FS. The authors reply. *New England Journal of Medicine*. 2017;377:1798.
- 18
- 19 35. Wallace MS, Ware MA. Medicinal marijuana here to stay and time to take responsibility. *Clinical Journal of Pain*. 2015;31:931-2.
- 20
- 21 36. Wan BA, Blake A, Chan S, Wolt A, Zaki P, Zhang L, et al. Patient characteristics from a medical cannabis provider. *Journal of Pain Management*. 2017;10:337-44.
- 22
- 23
- 24 37. Ware MA, St Arnaud-Trempe E. The abuse potential of the synthetic cannabinoid nabilone. *Addiction*. 2010;105:494-503.
- 25
- 26 38. Wilsey B, Atkinson JH, Marcotte TD, Grant I. The Medicinal Cannabis Treatment Agreement: Providing Information to Chronic Pain Patients Through a Written Document. *Clinical Journal of Pain*. 2015;31:1087-96.
- 27
- 28 39. Winston-McPherson GN, Lo SY, Baird GS, Hoofnagle AN, Greene DN. The Reply. *American Journal of Medicine*. 2019;132:e717.
- 29
- 30 40. Zaller N, Topletz A, Frater S, Yates G, Lally M. Profiles of medicinal cannabis patients attending compassion centers in rhode island. *Journal of Psychoactive Drugs*. 2015;47:18-23.
- 31
- 32
- 33 41. Ziadni M, Anastas T, Darnall B, Wilson A. Characterizing chronic pain in late adolescence and early adulthood: Opioid prescription, marijuana use, and predictors of pain interference. *Pain Medicine (United States)*. 2018;19 (4):856.
- 34
- 35
- 36 42. Zvolensky MJ, Cogle JR, Bonn-Miller MO, Norberg MM, Johnson K, Kosiba J, et al. Chronic pain and marijuana use among a nationally representative sample of adults. *American Journal on Addictions*. 2011;20:538-42.
- 37
- 38
- 39
- 40
- 41
- 42
- 43
- 44
- 45
- 46

**2. Abstract only (n=21)**

1. Aggarwal S, Bhowmick J, Sharma R, Singh M, Gond R K, Dash I, et al. Voice of cancer patients (VoCP): Patient perceptions regarding use of marijuana and its derivatives in cancer. *Journal of Clinical Oncology. Conference.* 2018; 36 (34).
2. Agornyo P, Choi S, Dahmer S, Nouryan CN, Wolf-Klein G, Martins-Welch D. Older adults' use of medical marijuana for chronic pain: A multi-site community-based survey. *Journal of the American Geriatrics Society.* 2018;66 (Supplement 2):S123.
3. Bar-Sela G, Avisar A, Batash R, Schaffer M. Is the clinical use of cannabis by oncology patients advisable? *Current Medicinal Chemistry.* 2014;21:1923-30.
4. Berg AM, Andrus LT, Brace C. Impact of the medical cannabis pilot program in Illinois: A pharmacist perspective. *Consultant Pharmacist.* 2017;32 (10):602.
5. Burks AR, Crossman H, Black S, Limmer JS, Kohn M, Sheeder J. Understanding pregnant women's beliefs and attitudes about marijuana in colorado. *Obstetrics and Gynecology.* 2016;127 (Supplement 1):106S.
6. Calvino B. Advocacy for therapeutic use of cannabis and its derivatives in the treatment of chronic pain. *Douleurs.* 2017;18:59-62.
7. Cofield SS, Salter AR, Tyry T, Crowe C, McNeal S, Cutter GR, et al. Differences in use and perceptions on effectiveness of marijuana for MS: A survey of NARCOMS participants. *Multiple Sclerosis.* 2015;1:333.
8. Fitzcharles MA. Should rheumatologists see patients with fibromyalgia and prescribe marijuana. *International Journal of Rheumatic Diseases.* 2019;22 (Supplement 3):8-9.
9. Galvin D, Mulkerrin O. Cannabis-based medications: A comparison of patients' knowledge and awareness in pain, neurology and prescription out-patient settings. *Pain Practice.* 2018;18 (Supplement 1):60.
10. Gavigan K, Venkatachalam S, Curtis J, Ginsberg S, Benjamin Nowell W. Patients' perception and use of medical marijuana. *Annals of the Rheumatic Diseases.* 2019;78 (Supplement 2):617.
11. Grella CE, Cochran S, Mays V. Does health status influence attitudes about and use of medical marijuana? Findings from a general population survey in California. *Drug and Alcohol Dependence.* 2015;146:e130-e1.
12. Gustavsen S, Sondergaard HB, Andresen SR, Sorensen PS, Sellebjerg FT, Oturai AB. Medical and recreational cannabis use in patients with multiple sclerosis in Denmark. *Multiple Sclerosis Journal.* 2018;24 (2 Supplement):954-5.
13. Kiszko K, Patel K, Chudasama B, Samodulski J, Nienaber C, Martins-Welch D, et al. Older adults' perspectives on medical marijuana (MM) use. *Journal of the American Geriatrics Society.* 2017;65 (Supplement 1):S70.

14. Lee KM, MacDiarmid P, Shalansky S, Wilcox P. The use of self-administered medicinal cannabis for cystic fibrosis symptom management: Patient-reported experiences. *Pediatric Pulmonology*. 2012;35):436.
15. Mitra F, Woolley T. Perceived patient benefits from using prescription opioids and other therapies to manage persistent pain. *Journal of Opioid Management*. 2019;16:5-14.
16. Muirhead C. Marijuana and CF: Controversies associated with patient use. *Pediatric Pulmonology*. 2015;41):152-4.
17. Pires C, Lachiewicz M. A pilot survey of marijuana use and self-reported benefit in women with chronic pelvic pain. *Pain Medicine (United States)*. 2018;19(4):890.
18. Rhyne R, Daitz B, Callan D, Sussman A, McKinney K, Sanchez C, et al. How patients decide what medical cannabis products to use for chronic pain: The patient-dispensary-doctor interface. *Medical Cannabis and Cannabinoids*. 2019;2 (2):75.
19. Sabet KA, Grossman E. Why do people use medical marijuana? The medical conditions of users in seven U.S. states. *Journal of Global Drug Policy and Practice*. 2014;8:1-26.
20. Schnelle M, Grotenhermen F, Reif M, Gorter RW. [Results of a standardized survey on the medical use of cannabis products in the German-speaking area]. *Forschende Komplementarmedizin*. 1999;6 Suppl 3:28-36.
21. Wurtzen H, Franchi F, Hojsted J. Investigating cognitive functioning in patients with chronic non-cancer pain (CNCP) before and during treatment with cannabis based medication - A longitudinal pilot study (N=11). *Scandinavian Journal of Pain*. 2018;18 (Supplement 1):S6.

### 3. Not patients with chronic pain or their carer (n=19)

1. Grinberg K. Factors affecting the population's opinions regarding cannabis treatment for chronic pain patients. *Pain Practice*. 2018;18 (Supplement 1):61.
2. Iskedjian M, Desjardins O, Piwko C, Bereza B, Jaszewski B, Einarson TR. Willingness to pay for a treatment for pain in multiple sclerosis. *Pharmacoeconomics*. 2009;27:149-58.
3. Grotenhermen F, Muller-Vahl K. IACM 2nd Conference on Cannabinoids in Medicine. *Expert Opinion on Pharmacotherapy*. 2003;4:2367-71.
4. Lau N, Sales P, Averill S, Murphy F, Sato SO, Murphy S. A safer alternative: Cannabis substitution as harm reduction. *Drug Alcohol Rev*. 2015;34:654-9.
5. Ishida JH, Wong PO, Cohen BE, Vali M, Steigerwald S, Keyhani S. Substitution of marijuana for opioids in a national survey of US adults. *PLoS one*. 2019;14 (10) (no pagination).

6. Lucas P, Baron EP, Jikomes N. Medical cannabis patterns of use and substitution for opioids & other pharmaceutical drugs, alcohol, tobacco, and illicit substances; Results from a cross-sectional survey of authorized patients. *Harm Reduction Journal*. 2019;16 (1) (no pagination).
7. Wan BA, Diaz P, Blake A, Chan S, Wolt A, Zaki P, et al. Efficacy of different varieties of medical cannabis in relieving symptoms. *Journal of Pain Management*. 2017;10:375-83.
8. Mendoza K, McPherson ML. Are we "In the Weeds"? What hospice providers want to know about medical cannabis. *Postgraduate Medicine*. 2016;128 (Supplement 2):60.
9. Mendoza KS, McPherson ML. Knowledge, Skills, and Attitudes Regarding the Use of Medical Cannabis in the Hospice Population: An Educational Intervention. *Am J Hosp Palliat Care*. 2018;35:759-66.
10. Schenker Y, Merlin JS, Quill T. In reply. *JAMA - Journal of the American Medical Association*. 2019;321:512.
11. Sharon H, Goldway N, Goor-Aryeh I, Eisenberg E, Brill S. Personal experience and attitudes of pain medicine specialists in Israel regarding the medical use of cannabis for chronic pain. *Journal of pain research*. 2018;11:1411-9.
12. St-Amant H, Ware MA, Julien N, Lacasse A. Prevalence and determinants of cannabinoid prescription for the management of chronic noncancer pain: a postal survey of physicians in the Abitibi-Temiscamingue region of Quebec. *CMAJ Open*. 2015;3:E251-7.
13. Starrels JL, Young S, Azari S, Edelman EJ, Pomeranz J, Roy PJ, et al. Experts disagree about marijuana use among patients on opioids for chronic pain. *Journal of General Internal Medicine*. 2018;33 (2 Supplement 1):190.
14. Starrels JL, Young SR, Azari SS, Becker WC, Jennifer Edelman E, Liebschutz JM, et al. Disagreement and Uncertainty Among Experts About how to Respond to Marijuana Use in Patients on Long-term Opioids for Chronic Pain: Results of a Delphi Study. *Pain Medicine*. 2020;21:247-54.
15. Zolotov Y, Sznitman S, Vulfsons S. Validation of Clinical Vignettes to Explore Medical Cannabis Practices. *Isr Med Assoc J*. 2019;21:710-5.
16. Zolotov Y, Vulfsons S, Sznitman S. Predicting Physicians' Intentions to Recommend Medical Cannabis. *J Pain Symptom Manage*. 2019;58:400-7.
17. Nouryan C, Martins-Welch D, Kline M, Modayil S, Dauber M, Akerman M, et al. Health providers' perspectives on medical marijuana use. *Journal of Palliative Medicine*. 2018;21 (5):A27.
18. Boehnke KF, Scott JR, Litinas E, Sisley S, Williams DA, Clauw DJ. Pills to Pot: Observational Analyses of Cannabis Substitution Among Medical Cannabis Users With Chronic Pain. *Journal of Pain*. 2019;20:830-41.

- 1  
2  
3  
4  
5 19. Khelemsky Y, Goldberg AT, Hurd YL, Winkel G, Ninh A, Qian L, et al. Perioperative Patient Beliefs Regarding Potential Effectiveness of Marijuana  
6 (Cannabinoids) for Treatment of Pain: A Prospective Population Survey. *Reg Anesth Pain Med*. 2017;42:652-9.

7  
8 **4. Not cannabis (n=3)**

- 9 1. Vargas-Schaffer G. Drugs able to prevent chronic pain. *Techniques in Regional Anesthesia and Pain Management*. 2014;18:92-9.
- 10 2. Manchikanti L, Atluri S, Trescot AM, Giordano J. Monitoring opioid adherence in chronic pain patients: Tools, techniques, and utility. *Pain Physician*.  
11 2008;11:S155-S80.
- 12 3. Mijatovic D, Lapin B, Davin S, Rispinto S. Psychosocial risk factors for predicting patient dropout of an interdisciplinary pain program: A retrospective analysis.  
13 *Pain Medicine (United States)*\_1. 2019;20 (3):647-8.

14  
15  
16 **5. Personal experience (case study) (n=2)**

- 17 1. Friedberg J. Medical cannabis: Four patient perspectives. *Journal of Pain Management*. 2016;9:517-9.
- 18 2. Greenberg L. "Oh, the Times They Are a Changin'": Reflections on Personal Experiences with Medical Cannabis Therapy. *Cannabis and Cannabinoid Research*.  
19 2019;4:75-6.

20  
21  
22 **6. Value and preference data not elicited from patients or their carers (n=1)**

- 23 1. Burke J. Drug diversion and abuse: Medical marijuana: Miracle or scam? *Pharmacy Times*. 2010;76.
- 24  
25  
26  
27  
28  
29  
30  
31  
32  
33  
34  
35  
36  
37  
38  
39  
40  
41  
42  
43  
44  
45  
46



## Appendix 7 Risk of bias assessments for quantitative studies

| Study ID (Reference number)       | Was the study sample selected in a manner to ensure the representativeness to the target population? | Was the attrition sufficiently low to minimize the risk of bias? | Was the choice of the methodology appropriate for addressing the study aim? | Was the instrument (or tools that was used to elicit values and preferences, e.g. questionnaire) administered in the intended way? | Was a valid representation of the outcome/health state (e.g. a state of pain relief - a beneficial outcome of medical cannabis, or an experience of coughing - a harmful outcome of medical cannabis) utilized? | Did the researchers check the understanding to the measurement techniques (e.g. questionnaire in a survey)? | Were the results analyzed appropriately? | Overall risk of bias |
|-----------------------------------|------------------------------------------------------------------------------------------------------|------------------------------------------------------------------|-----------------------------------------------------------------------------|------------------------------------------------------------------------------------------------------------------------------------|-----------------------------------------------------------------------------------------------------------------------------------------------------------------------------------------------------------------|-------------------------------------------------------------------------------------------------------------|------------------------------------------|----------------------|
| Boehnke 2019 (21)                 | Probably yes                                                                                         | Probably yes                                                     | Probably yes                                                                | Yes                                                                                                                                | NA                                                                                                                                                                                                              | Probably yes                                                                                                | Yes                                      | Moderate             |
| Degenhardt 2015 (24)              | Probably yes                                                                                         | Yes                                                              | Yes                                                                         | Yes                                                                                                                                | NA                                                                                                                                                                                                              | Probably yes                                                                                                | Yes                                      | Moderate             |
| Heng 2018 (27)                    | Probably yes                                                                                         | Yes                                                              | Probably yes                                                                | Yes                                                                                                                                | NA                                                                                                                                                                                                              | Probably yes                                                                                                | Yes                                      | Moderate             |
| Gill 2001 (26)                    | Probably yes                                                                                         | Yes                                                              | Yes                                                                         | Probably yes                                                                                                                       | Probably no                                                                                                                                                                                                     | Probably yes                                                                                                | Probably yes                             | Serious              |
| Gallagher 2003 (25)               | Probably yes                                                                                         | Probably no                                                      | Yes                                                                         | Yes                                                                                                                                | Probably no                                                                                                                                                                                                     | Probably no                                                                                                 | Probably no                              | Critical             |
| Piper BJ 2017 (35)                | Yes                                                                                                  | Probably no                                                      | Yes                                                                         | Yes                                                                                                                                | NA                                                                                                                                                                                                              | Yes                                                                                                         | yes                                      | Serious              |
| Sexton 2016 (30)                  | Yes                                                                                                  | Probably yes                                                     | Yes                                                                         | Yes                                                                                                                                | NA                                                                                                                                                                                                              | Yes                                                                                                         | Yes                                      | Moderate             |
| Zarrabi 2020, Singh 2019 (31, 34) | Probably yes                                                                                         | Probably yes                                                     | Yes                                                                         | Yes                                                                                                                                | Probably no                                                                                                                                                                                                     | Probably no                                                                                                 | Yes                                      | Serious              |
| Notcutt 2004 (33)                 | Probably yes                                                                                         | Probably Yes                                                     | Probably yes                                                                | Probably yes                                                                                                                       | NA                                                                                                                                                                                                              | Probably yes                                                                                                | Probably yes                             | Moderate             |
| Rochford 2019 (29)                | Probably no                                                                                          | Probably yes                                                     | Probably yes                                                                | Probably yes                                                                                                                       | NA                                                                                                                                                                                                              | Probably yes                                                                                                | Probably yes                             | Serious              |

#### Appendix 8 Methodological limitations assessments for qualitative studies

| Study ID<br>(Reference<br>number) | Was there<br>a clear<br>statement<br>of the<br>aims of<br>the<br>research? | Is a<br>qualitati<br>ve<br>method<br>ology<br>appropri<br>ate? | Was the<br>research<br>design<br>appropriate<br>to address<br>the aims of<br>the<br>research? | Was the<br>recruitment<br>strategy<br>appropriate<br>to the aims<br>of the<br>research? | Was the<br>data<br>collected in<br>a way that<br>addressed<br>the<br>research<br>issue? | Has the<br>relationship<br>between<br>researcher<br>and<br>participants<br>been<br>adequately<br>considered? | Have<br>ethical<br>issues been<br>taken into<br>considerati<br>on? | Was the<br>data<br>analysis<br>sufficiently<br>rigorous? | Is there a<br>clear<br>statement<br>of<br>findings? | How<br>valuable<br>is the<br>research<br>?<br>? | Overall<br>methodologi<br>cal<br>limitations |
|-----------------------------------|----------------------------------------------------------------------------|----------------------------------------------------------------|-----------------------------------------------------------------------------------------------|-----------------------------------------------------------------------------------------|-----------------------------------------------------------------------------------------|--------------------------------------------------------------------------------------------------------------|--------------------------------------------------------------------|----------------------------------------------------------|-----------------------------------------------------|-------------------------------------------------|----------------------------------------------|
| Bruce 2018<br>(22)                | Yes                                                                        | Yes                                                            | Yes                                                                                           | Can't tell                                                                              | Yes                                                                                     | No                                                                                                           | Yes                                                                | Yes                                                      | Yes                                                 | Yes                                             | No or minor                                  |
| Cooke<br>2019 (23)                | Yes                                                                        | Yes                                                            | Yes                                                                                           | Can't tell                                                                              | Yes                                                                                     | No                                                                                                           | Can't tell                                                         | Yes                                                      | No                                                  | Yes                                             | Moderate                                     |
| Bigand<br>2019 (20)               | Yes                                                                        | Yes                                                            | No                                                                                            | Can't tell                                                                              | No                                                                                      | No                                                                                                           | Yes                                                                | Yes                                                      | Yes                                                 | Yes                                             | Serious                                      |
| Lavie-Ajayi<br>2019 (28)          | Yes                                                                        | Yes                                                            | Yes                                                                                           | Yes                                                                                     | Yes                                                                                     | No                                                                                                           | Can't tell                                                         | Yes                                                      | Yes                                                 | Yes                                             | No or minor                                  |
| Satterlund<br>2015 (32)           | Yes                                                                        | Yes                                                            | Yes                                                                                           | Can't tell                                                                              | Yes                                                                                     | No                                                                                                           | Yes                                                                | Yes                                                      | Yes                                                 | Yes                                             | Moderate                                     |

## Appendix 9 Evidence profile for review findings

| Review finding                                                                                                  | Explanation                                                                                                                                                                                                                                                                                                                                                                                                                                                                                                                                                                          | Certainty assessment with GRADE/ GRADE CERQual |                               |                                          |                          |                         |                       |                           | Certainty |
|-----------------------------------------------------------------------------------------------------------------|--------------------------------------------------------------------------------------------------------------------------------------------------------------------------------------------------------------------------------------------------------------------------------------------------------------------------------------------------------------------------------------------------------------------------------------------------------------------------------------------------------------------------------------------------------------------------------------|------------------------------------------------|-------------------------------|------------------------------------------|--------------------------|-------------------------|-----------------------|---------------------------|-----------|
|                                                                                                                 |                                                                                                                                                                                                                                                                                                                                                                                                                                                                                                                                                                                      | Study design (Reference number)                | NO. of studies (participants) | Risk of bias/ Methodological limitations | Inconsistency/ Coherence | Indirectness/ Relevance | Imprecision/ Adequacy | Small effect bias         |           |
| <b>1. Values and preferences towards medical cannabis</b>                                                       |                                                                                                                                                                                                                                                                                                                                                                                                                                                                                                                                                                                      |                                                |                               |                                          |                          |                         |                       |                           |           |
| <b>1.1 Use of medical cannabis for chronic pain</b>                                                             |                                                                                                                                                                                                                                                                                                                                                                                                                                                                                                                                                                                      |                                                |                               |                                          |                          |                         |                       |                           |           |
| Patients had mixed levels of comfort or willingness to use medical cannabis.                                    | [Quantitative] Most patients with advanced life-limiting illnesses were comfortable using cannabis for chronic pain and nausea (25), while other non-palliative patients with chronic pain were unwilling or ambivalent about medical cannabis use (26). Non-White patients with advanced illness were more concerned about medical cannabis compared to White patients, but they remained comfortable using medical cannabis (25). Chronic pain patients who use both medical cannabis and other prescription medications believed that medical cannabis was effective for managing | Quantitative (25,26,27)                        | 3 (633)                       | Serious risk                             | Not serious              | Serious                 | Not serious           | Not serious               | Low       |
| Patients with a range of chronic medical conditions believed that medical cannabis was effective for pain (22). | [Qualitative] Patients with a range of chronic medical conditions believed that medical cannabis was effective for pain (22).                                                                                                                                                                                                                                                                                                                                                                                                                                                        | Qualitative (22)                               | 1 (30)                        | No or very minor concerns                | NA                       | Minor concerns          | Serious concerns      | No or very minor concerns | Low       |

1  
2  
3  
4  
5  
6  
7  
8  
9  
10  
11  
12  
13  
14  
15  
16  
17  
18  
19  
20  
21  
22  
23  
24  
25  
26  
27  
28  
29  
30  
31  
32  
33  
34  
35  
36  
37  
38  
39  
40  
41  
42  
43  
44  
45  
46

|                                                                                                              |                                                                                                                                                                                                                                                                                                                                                                                                                |                               |         |                           |             |                           |                  |                           |          |
|--------------------------------------------------------------------------------------------------------------|----------------------------------------------------------------------------------------------------------------------------------------------------------------------------------------------------------------------------------------------------------------------------------------------------------------------------------------------------------------------------------------------------------------|-------------------------------|---------|---------------------------|-------------|---------------------------|------------------|---------------------------|----------|
| Most patients who use medical cannabis had a positive attitude toward its use for pain relief.               | [Quantitative]<br>Those using medical cannabis during their recovery believed that it reduced pain (25). Most individuals expressed positive aspects of medical cannabis use, such as pain reduction (27, 31, 34). The majority of participants with cancer in one study reported using cannabis products for a “cancer cure” (31). Some believed that cannabis should be legalized for medical purposes (29). | Quantitative (25,27,29,31,34) | 4 (765) | Serious risk              | Not serious | Serious                   | Not serious      | Not serious               | Low      |
|                                                                                                              | [Qualitative]<br>Most individuals expressed use of medical cannabis for chronic pain was associated with a range of improved outcomes (e.g. better function, sleep, life changing etc.) (28).                                                                                                                                                                                                                  | Qualitative (28)              | 1 (19)  | No or very minor concerns | NA          | No or very minor concerns | Serious concerns | No or very minor concerns | Moderate |
| <b>1.2 Medical cannabis over other pain medicines</b>                                                        |                                                                                                                                                                                                                                                                                                                                                                                                                |                               |         |                           |             |                           |                  |                           |          |
| Patients with chronic pain and substance use histories preferred medical cannabis over prescription opioids. | [Qualitative]<br>Patients with chronic pain and substance use histories preferred medical cannabis over prescription opioids to manage pain (23).                                                                                                                                                                                                                                                              | Qualitative (23)              | 1 (46)  | No or very minor concerns | NA          | Minor concerns            | Serious concerns | No or very minor concerns | Low      |

|    |               |                                                   |                   |        |              |             |         |         |             |          |
|----|---------------|---------------------------------------------------|-------------------|--------|--------------|-------------|---------|---------|-------------|----------|
| 1  |               |                                                   |                   |        |              |             |         |         |             |          |
| 2  |               |                                                   |                   |        |              |             |         |         |             |          |
| 3  |               |                                                   |                   |        |              |             |         |         |             |          |
| 4  |               |                                                   |                   |        |              |             |         |         |             |          |
| 5  | Some patients | [Quantitative]                                    | Quantitative (25) | 1 (68) | Very serious | Not serious | Serious | Serious | Not serious | Very low |
| 6  | believed that | Some participants believed that because           |                   |        |              |             |         |         |             |          |
| 7  | medical       | cannabis is a 'natural' product, it is safer than |                   |        |              |             |         |         |             |          |
| 8  | cannabis is   | morphine and other strong pain killers (25).      |                   |        |              |             |         |         |             |          |
| 9  | safer than    | Non-Christians were more likely to believe        |                   |        |              |             |         |         |             |          |
| 10 | morphine and  | that cannabis is safer than morphine (25).        |                   |        |              |             |         |         |             |          |
| 11 | other strong  | Those with high school education or less,         |                   |        |              |             |         |         |             |          |
| 12 | pain killers. | were significantly less likely to believe that    |                   |        |              |             |         |         |             |          |
| 13 |               | cannabis was safer than morphine (25).            |                   |        |              |             |         |         |             |          |
| 14 |               |                                                   |                   |        |              |             |         |         |             |          |
| 15 |               |                                                   |                   |        |              |             |         |         |             |          |

### 16 1.3 Different preparations of medical cannabis

#### 18 *Cannabis variety (i.e. sativa, indica, hybrid)*

|    |               |                                               |                   |          |              |             |             |             |             |          |
|----|---------------|-----------------------------------------------|-------------------|----------|--------------|-------------|-------------|-------------|-------------|----------|
| 20 |               |                                               |                   |          |              |             |             |             |             |          |
| 21 | Most patients | [Quantitative]                                | Quantitative (21) | 1 (1321) | Serious risk | Not serious | Not serious | Not serious | Not serious | Moderate |
| 22 | preferred     | Most patients preferred using a blend of      |                   |          |              |             |             |             |             |          |
| 23 | medical       | indica and sativa to manage chronic pain,     |                   |          |              |             |             |             |             |          |
| 24 | cannabis with | followed by indica alone and sativa alone.    |                   |          |              |             |             |             |             |          |
| 25 | a blend of    | There were no differences in cannabis variety |                   |          |              |             |             |             |             |          |
| 26 | indica and    | preferences between males and females,        |                   |          |              |             |             |             |             |          |
| 27 | sativa,       | those who use cannabis for medical purposes   |                   |          |              |             |             |             |             |          |
| 28 | regardless of | only and those who use for medical and        |                   |          |              |             |             |             |             |          |
| 29 | gender,       | recreational purposes, or novice and          |                   |          |              |             |             |             |             |          |
| 30 | reasons for   | experienced users.(21)                        |                   |          |              |             |             |             |             |          |
| 31 | use, and      |                                               |                   |          |              |             |             |             |             |          |
| 32 | cannabis      |                                               |                   |          |              |             |             |             |             |          |
| 33 |               |                                               |                   |          |              |             |             |             |             |          |

#### 34 *Cannabis content (i.e. THC or CBD potency, ratio of THC and CBD)*

35

36

37

38

39

40

41

42

43

44

45

46

1  
2  
3  
4  
5  
6  
7  
8  
9  
10  
11  
12  
13  
14  
15  
16  
17  
18  
19  
20  
21  
22  
23  
24  
25  
26  
27  
28  
29  
30  
31  
32  
33  
34  
35  
36  
37  
38  
39  
40  
41  
42  
43  
44  
45  
46

|                                                                                                                                                                        |                                                                                                                                                                                                                                                                                                                                                                                                                                                                                                                                                                                                  |                       |          |              |             |             |             |             |          |
|------------------------------------------------------------------------------------------------------------------------------------------------------------------------|--------------------------------------------------------------------------------------------------------------------------------------------------------------------------------------------------------------------------------------------------------------------------------------------------------------------------------------------------------------------------------------------------------------------------------------------------------------------------------------------------------------------------------------------------------------------------------------------------|-----------------------|----------|--------------|-------------|-------------|-------------|-------------|----------|
| High THC and high CBD is the most preferred preparation, but gender, reason for use, and cannabis experience level influenced patients' preference for cannabis ratio. | [Quantitative] Females preferred low THC: high CBD, while males preferred equal ratios of THC: CBD. (21) Patients who use cannabis for medical purposes reported a greater preference for products with low THC: high CBD compared to individuals who use cannabis both medically and recreationally. (21) Both novice and experienced cannabis users preferred high CBD products most, and more novice users prefer low THC: high CBD while experienced users preferred high THC: high CBD.(21) Almost none preferred high THC and low CBD, low THC and low CBD, only CBD, or only THC.(21, 33) | Quantitative (21, 33) | 2 (1355) | Serious risk | Not serious | Not serious | Not serious | Not serious | Moderate |
|------------------------------------------------------------------------------------------------------------------------------------------------------------------------|--------------------------------------------------------------------------------------------------------------------------------------------------------------------------------------------------------------------------------------------------------------------------------------------------------------------------------------------------------------------------------------------------------------------------------------------------------------------------------------------------------------------------------------------------------------------------------------------------|-----------------------|----------|--------------|-------------|-------------|-------------|-------------|----------|

**Cannabis administration route**

|    |                |                                                |                    |          |              |             |             |             |          |
|----|----------------|------------------------------------------------|--------------------|----------|--------------|-------------|-------------|-------------|----------|
| 1  |                |                                                |                    |          |              |             |             |             |          |
| 2  |                |                                                |                    |          |              |             |             |             |          |
| 3  |                |                                                |                    |          |              |             |             |             |          |
| 4  |                |                                                |                    |          |              |             |             |             |          |
| 5  | Gender,        | [Quantitative]                                 | Quantitative (21), | 2 (2305) | Serious risk | Not serious | Not serious | Not serious | Moderate |
| 6  | reason for use | Females patients preferred to use tincture     | Mixed (35)         |          |              |             | serious     | serious     |          |
| 7  | and cannabis   | and topical preparations and less preferred to |                    |          |              |             |             |             |          |
| 8  | experience     | use vaporizing and smoking preparations        |                    |          |              |             |             |             |          |
| 9  | level          | compared with males. (21)                      |                    |          |              |             |             |             |          |
| 10 | influenced     |                                                |                    |          |              |             |             |             |          |
| 11 | patients'      | Patients who used cannabis both                |                    |          |              |             |             |             |          |
| 12 | preferred      | recreationally and medically preferred         |                    |          |              |             |             |             |          |
| 13 | cannabis       | smoking and vaporizing, while those who        |                    |          |              |             |             |             |          |
| 14 | administratio  | used cannabis medically only preferred         |                    |          |              |             |             |             |          |
| 15 | n routes.      | smoking, vaporizing, tinctures, and edibles.   |                    |          |              |             |             |             |          |
| 16 |                | (21)                                           |                    |          |              |             |             |             |          |
| 17 |                |                                                |                    |          |              |             |             |             |          |
| 18 |                | Experienced cannabis users preferred           |                    |          |              |             |             |             |          |
| 19 |                | multiple administration routes compared with   |                    |          |              |             |             |             |          |
| 20 |                | novice users. Smoking, vaporizing, and edibles |                    |          |              |             |             |             |          |
| 21 |                | were the most common preferred                 |                    |          |              |             |             |             |          |
| 22 |                | administration routes among both experience    |                    |          |              |             |             |             |          |
| 23 |                | and novice users. (21)                         |                    |          |              |             |             |             |          |
| 24 |                |                                                |                    |          |              |             |             |             |          |
| 25 |                |                                                |                    |          |              |             |             |             |          |
| 26 |                | [Mixed]                                        |                    |          |              |             |             |             |          |
| 27 |                | Among chronic pain patients who are legal      |                    |          |              |             |             |             |          |
| 28 |                | members of medical cannabis dispensaries, a    |                    |          |              |             |             |             |          |
| 29 |                | minority of participants preferred using a     |                    |          |              |             |             |             |          |
| 30 |                | joint, pipe, or bong, while some preferred     |                    |          |              |             |             |             |          |
| 31 |                | vaporizers, edibles, or tinctures; very few    |                    |          |              |             |             |             |          |
| 32 |                | preferred concentrates or topicals. In         |                    |          |              |             |             |             |          |
| 33 |                | addition, very few participants reported       |                    |          |              |             |             |             |          |
| 34 |                | unpleasant routes of administration as what    |                    |          |              |             |             |             |          |
| 35 |                | they liked least about medical cannabis. (25)  |                    |          |              |             |             |             |          |
| 36 |                |                                                |                    |          |              |             |             |             |          |
| 37 |                |                                                |                    |          |              |             |             |             |          |
| 38 |                |                                                |                    |          |              |             |             |             |          |
| 39 |                |                                                |                    |          |              |             |             |             |          |
| 40 |                |                                                |                    |          |              |             |             |             |          |
| 41 |                |                                                |                    |          |              |             |             |             |          |
| 42 |                |                                                |                    |          |              |             |             |             |          |
| 43 |                |                                                |                    |          |              |             |             |             |          |
| 44 |                |                                                |                    |          |              |             |             |             |          |
| 45 |                |                                                |                    |          |              |             |             |             |          |
| 46 |                |                                                |                    |          |              |             |             |             |          |

For peer review only

1  
2  
3  
4  
5  
6  
7  
8  
9  
10  
11  
12  
13  
14  
15  
16  
17  
18  
19  
20  
21  
22  
23  
24  
25  
26  
27  
28  
29  
30  
31  
32  
33  
34  
35  
36  
37  
38  
39  
40  
41  
42  
43  
44  
45  
46

|                                                                                                      |                                                                                                                                                                                                                        |                   |        |              |             |             |         |             |     |
|------------------------------------------------------------------------------------------------------|------------------------------------------------------------------------------------------------------------------------------------------------------------------------------------------------------------------------|-------------------|--------|--------------|-------------|-------------|---------|-------------|-----|
| Most patients who have an advanced life-limiting illness preferred an oral form of medical cannabis. | [Quantitative]<br>Most patients who have an advanced life-limiting illness stated preference for an oral form (pill, droplets under the tongue, or droplets added to food) and only a minority preferred smoking. (25) | Quantitative (25) | 1 (68) | Very serious | Not serious | Not serious | Serious | Not serious | Low |
|------------------------------------------------------------------------------------------------------|------------------------------------------------------------------------------------------------------------------------------------------------------------------------------------------------------------------------|-------------------|--------|--------------|-------------|-------------|---------|-------------|-----|

**152. Factors that influenced patient’s decision regarding use of medical cannabis**

**162.1 Factors influenced the choice of medical cannabis use**

|                                                                                                                                                      |                                                                                                                                                                                                                                                                                                                                                                                                                                           |            |        |              |             |             |             |             |          |
|------------------------------------------------------------------------------------------------------------------------------------------------------|-------------------------------------------------------------------------------------------------------------------------------------------------------------------------------------------------------------------------------------------------------------------------------------------------------------------------------------------------------------------------------------------------------------------------------------------|------------|--------|--------------|-------------|-------------|-------------|-------------|----------|
| Most patients used medical cannabis because it improved the management of symptoms associated with pain, mental health and other medical conditions. | [Mixed]<br>Some patients who were legal members of medical cannabis dispensaries preferred aspects of medical cannabis related to health and well-being, including pain relief, sleep benefits, limited addiction potential, improved quality of life, functionality, and relaxation, while others preferred general aspects of medical cannabis, like general improvement in the quality of life, functionality, cognitive aspects (35). | Mixed (35) | 1(984) | Serious risk | Not serious | Not serious | Not serious | Not serious | Moderate |
|------------------------------------------------------------------------------------------------------------------------------------------------------|-------------------------------------------------------------------------------------------------------------------------------------------------------------------------------------------------------------------------------------------------------------------------------------------------------------------------------------------------------------------------------------------------------------------------------------------|------------|--------|--------------|-------------|-------------|-------------|-------------|----------|



1  
2  
3  
4  
5  
6  
7  
8  
9  
10  
11  
12  
13  
14  
15  
16  
17  
18  
19  
20  
21  
22  
23  
24  
25  
26  
27  
28  
29  
30  
31  
32  
33  
34  
35  
36  
37  
38  
39  
40  
41  
42  
43  
44  
45  
46

[Qualitative]

Patients viewed medical cannabis as an effective approach to managing symptoms with or without other medications (20, 22, 23), including pain (20, 22, 23), disrupted sleep, poor appetite, and nausea (20). Patients reported that cannabis improved emotional and mental well-being by reducing anxiety, depression and stress (20). Patients also reported that cannabis allowed them to sleep, focus and function (28). Most patients reported that cannabis facilitated a state of relaxation in which pain could be dealt with in a more tolerable form (28).

However, patients found that medical cannabis use sometimes made it difficult to manage their medication regimen (23).

|                              |         |                |                           |                           |                           |                           |      |
|------------------------------|---------|----------------|---------------------------|---------------------------|---------------------------|---------------------------|------|
| Qualitative (20, 22, 23, 28) | 4 (245) | Minor concerns | No or very minor concerns | High |
|------------------------------|---------|----------------|---------------------------|---------------------------|---------------------------|---------------------------|------|

1  
2  
3  
4  
5  
6  
7  
8  
9  
10  
11  
12  
13  
14  
15  
16  
17  
18  
19  
20  
21  
22  
23  
24  
25  
26  
27  
28  
29  
30  
31  
32  
33  
34  
35  
36  
37  
38  
39  
40  
41  
42  
43  
44  
45  
46

|                                                                                                |                                                                                                                                                                                                                                                                              |                   |         |              |             |             |             |             |          |
|------------------------------------------------------------------------------------------------|------------------------------------------------------------------------------------------------------------------------------------------------------------------------------------------------------------------------------------------------------------------------------|-------------------|---------|--------------|-------------|-------------|-------------|-------------|----------|
| Most patients were motivated to use medical cannabis to reduce other prescription medications. | [Quantitative]<br>Chronic pain patients who used both medical cannabis and prescription medications believed that medical cannabis was effective for pain relief and were motivated to use medical cannabis to decrease the amount of prescribed medications they used (27). | Quantitative (27) | 1 (500) | Serious risk | Not serious | Not serious | Not serious | Not serious | Moderate |
|------------------------------------------------------------------------------------------------|------------------------------------------------------------------------------------------------------------------------------------------------------------------------------------------------------------------------------------------------------------------------------|-------------------|---------|--------------|-------------|-------------|-------------|-------------|----------|

For peer review only

1  
2  
3  
4  
5  
6  
7  
8  
9  
10  
11  
12  
13  
14  
15  
16  
17  
18  
19  
20  
21  
22  
23  
24  
25  
26  
27  
28  
29  
30  
31  
32  
33  
34  
35  
36  
37  
38  
39  
40  
41  
42  
43  
44  
45  
46

[Qualitative]

Patients with a range of chronic medical conditions (22) believed that medical cannabis managed pain symptoms and were motivated to use medical cannabis to decrease the amount of prescribed medications they used (22).

Qualitative (22)

1 (30)

No or very minor concerns

NA

No or very minor concerns

Moderate concerns

No or very minor concerns

Moderate

For peer review only

1  
2  
3  
4  
5  
6  
7  
8  
9  
10  
11  
12  
13  
14  
15  
16  
17  
18  
19  
20  
21  
22  
23  
24  
25  
26  
27  
28  
29  
30  
31  
32  
33  
34  
35  
36  
37  
38  
39  
40  
41  
42  
43  
44  
45  
46

|                                                                                                                                                            |                                                                                                                                                                                                                                                                                                                                                  |                            |          |              |             |             |             |             |          |
|------------------------------------------------------------------------------------------------------------------------------------------------------------|--------------------------------------------------------------------------------------------------------------------------------------------------------------------------------------------------------------------------------------------------------------------------------------------------------------------------------------------------|----------------------------|----------|--------------|-------------|-------------|-------------|-------------|----------|
| The majority of patients expressed that their cannabis use was influenced by positive social consequences, such as social support from friends and family. | [Quantitative]<br>A majority of patients agreed that cannabis for medical use would not cause disagreements or relationship problems with their loved ones (25). Most participants reported that their family members were supportive of their use, and the majority reported that their medical providers were supportive of their use (31,34). | Quantitative<br>(25,31,34) | 2 (2104) | Serious risk | Not serious | Not serious | Not serious | Not serious | Moderate |
|------------------------------------------------------------------------------------------------------------------------------------------------------------|--------------------------------------------------------------------------------------------------------------------------------------------------------------------------------------------------------------------------------------------------------------------------------------------------------------------------------------------------|----------------------------|----------|--------------|-------------|-------------|-------------|-------------|----------|

For peer review only

1  
2  
3  
4  
5  
6  
7  
8  
9  
10  
11  
12  
13  
14  
15  
16  
17  
18  
19  
20  
21  
22  
23  
24  
25  
26  
27  
28  
29  
30  
31  
32  
33  
34  
35  
36  
37  
38  
39  
40  
41  
42  
43  
44  
45  
46

[Quantitative]  
 Concerns about medical cannabis included concerns about side effects, addiction, tolerance, losing control or acting strangely, and were related to unwillingness to use cannabis (27). Patients who used cannabis to manage their pain had greater feelings of anxiety, and increased catastrophic thinking (26). Among those who were unwilling to use cannabis, increased age was related to more concerns about medical cannabis, including concerns of losing control (26). Increased age also impacted beliefs that cannabis was a useful medication to treat pain (27). Some patients reported that they were concerned about unpleasant physical or emotional symptoms suggestive of withdrawal after stopping medical cannabis use (31 , 34). Some patients were concerned about mental or physical dependence to medical cannabis; however, most did not perceive themselves as addicted to medical cannabis (31 , 34). Concerns about addiction were associated with unwillingness to use medical cannabis (26).  
 [Mixed]  
 Some patients who were legal members of medical cannabis dispensaries reported adverse physical, cognitive, and emotional effects of medical cannabis, as well as people’s negative and stigmatizing values towards medical cannabis (35).

Quantitative (26, 27, 31, 34), Mixed (35)      4(1650)      Serious risk      Not serious      Not serious      Not serious      Not serious      Moderate

|    |                                              |                  |         |          |            |            |          |          |          |
|----|----------------------------------------------|------------------|---------|----------|------------|------------|----------|----------|----------|
| 1  |                                              |                  |         |          |            |            |          |          |          |
| 2  |                                              |                  |         |          |            |            |          |          |          |
| 3  |                                              |                  |         |          |            |            |          |          |          |
| 4  |                                              |                  |         |          |            |            |          |          |          |
| 5  | [Qualitative]                                | Qualitative (20, | 2 (196) | Moderate | No or very | No or very | Minor    | No or    | Moderate |
| 6  | Patients commonly reported lack of           | 23)              |         | concerns | minor      | minor      | concerns | very     |          |
| 7  | concentration, poor memory and sleepiness    |                  |         |          | concerns   | concerns   |          | minor    |          |
| 8  | as consequences of medical cannabis use.     |                  |         |          |            |            |          | concerns |          |
| 9  | Participants also reported minor consequence |                  |         |          |            |            |          |          |          |
| 10 | which included eating too much, coughing,    |                  |         |          |            |            |          |          |          |
| 11 | and weight gain. Seizures and anaphylaxis    |                  |         |          |            |            |          |          |          |
| 12 | from an allergic reaction were described as  |                  |         |          |            |            |          |          |          |
| 13 | severe consequences from use (20).           |                  |         |          |            |            |          |          |          |
| 14 |                                              |                  |         |          |            |            |          |          |          |
| 15 | Some patients were concerned that, while     |                  |         |          |            |            |          |          |          |
| 16 | medical cannabis helped with pain            |                  |         |          |            |            |          |          |          |
| 17 | management, it might lead addiction (23).    |                  |         |          |            |            |          |          |          |
| 18 | Patients with a history of addiction were    |                  |         |          |            |            |          |          |          |
| 19 | concerned that medical cannabis use could    |                  |         |          |            |            |          |          |          |
| 20 | pose a threat to their sobriety (23).        |                  |         |          |            |            |          |          |          |
| 21 |                                              |                  |         |          |            |            |          |          |          |
| 22 |                                              |                  |         |          |            |            |          |          |          |
| 23 |                                              |                  |         |          |            |            |          |          |          |
| 24 |                                              |                  |         |          |            |            |          |          |          |
| 25 |                                              |                  |         |          |            |            |          |          |          |
| 26 |                                              |                  |         |          |            |            |          |          |          |
| 27 |                                              |                  |         |          |            |            |          |          |          |
| 28 |                                              |                  |         |          |            |            |          |          |          |
| 29 |                                              |                  |         |          |            |            |          |          |          |
| 30 |                                              |                  |         |          |            |            |          |          |          |
| 31 |                                              |                  |         |          |            |            |          |          |          |
| 32 |                                              |                  |         |          |            |            |          |          |          |
| 33 |                                              |                  |         |          |            |            |          |          |          |
| 34 |                                              |                  |         |          |            |            |          |          |          |
| 35 |                                              |                  |         |          |            |            |          |          |          |
| 36 |                                              |                  |         |          |            |            |          |          |          |
| 37 |                                              |                  |         |          |            |            |          |          |          |
| 38 |                                              |                  |         |          |            |            |          |          |          |
| 39 |                                              |                  |         |          |            |            |          |          |          |
| 40 |                                              |                  |         |          |            |            |          |          |          |
| 41 |                                              |                  |         |          |            |            |          |          |          |
| 42 |                                              |                  |         |          |            |            |          |          |          |
| 43 |                                              |                  |         |          |            |            |          |          |          |
| 44 |                                              |                  |         |          |            |            |          |          |          |
| 45 |                                              |                  |         |          |            |            |          |          |          |
| 46 |                                              |                  |         |          |            |            |          |          |          |

1  
2  
3  
4  
5  
6  
7  
8  
9  
10  
11  
12  
13  
14  
15  
16  
17  
18  
19  
20  
21  
22  
23  
24  
25  
26  
27  
28  
29  
30  
31  
32  
33  
34  
35  
36  
37  
38  
39  
40  
41  
42  
43  
44  
45  
46

|                                                                                                                 |                                                                                                                                                                                                                                                                                                                                                                                                                                                                                                                                                                                                                |                                            |          |              |             |             |             |             |          |
|-----------------------------------------------------------------------------------------------------------------|----------------------------------------------------------------------------------------------------------------------------------------------------------------------------------------------------------------------------------------------------------------------------------------------------------------------------------------------------------------------------------------------------------------------------------------------------------------------------------------------------------------------------------------------------------------------------------------------------------------|--------------------------------------------|----------|--------------|-------------|-------------|-------------|-------------|----------|
| Most patients expressed that their cannabis use was influenced by negative social consequences, such as stigma. | [Quantitative]<br>Patients who were comfortable with their cannabis use for pain had a significant concern over the use of cannabis leading to relationship problems or disagreements with loved ones (25). Some patients agreed that medical cannabis would make them vulnerable to attack and theft by substance abusers. A minority of patients agreed that medical cannabis would cause problems with the law, and that they may be arrested or charged with possession of cannabis (25). Some patients expressed concerns about others' opinions towards their used of cannabis-related products (31,34). | Quantitative (25,26,31, 34),<br>Mixed (35) | 4 (3153) | Serious risk | Not serious | Not serious | Not serious | Not serious | Moderate |
|-----------------------------------------------------------------------------------------------------------------|----------------------------------------------------------------------------------------------------------------------------------------------------------------------------------------------------------------------------------------------------------------------------------------------------------------------------------------------------------------------------------------------------------------------------------------------------------------------------------------------------------------------------------------------------------------------------------------------------------------|--------------------------------------------|----------|--------------|-------------|-------------|-------------|-------------|----------|

|    |                                               |                                                 |                     |                   |                           |                           |                |                           |          |
|----|-----------------------------------------------|-------------------------------------------------|---------------------|-------------------|---------------------------|---------------------------|----------------|---------------------------|----------|
| 1  |                                               |                                                 |                     |                   |                           |                           |                |                           |          |
| 2  |                                               |                                                 |                     |                   |                           |                           |                |                           |          |
| 3  |                                               |                                                 |                     |                   |                           |                           |                |                           |          |
| 4  |                                               |                                                 |                     |                   |                           |                           |                |                           |          |
| 5  | [Qualitative]                                 | Qualitative (20, 32)                            | 2 (168)             | Moderate concerns | No or very minor concerns | No or very minor concerns | Minor concerns | No or very minor concerns | Moderate |
| 6  | Commonly reported negative social             |                                                 |                     |                   |                           |                           |                |                           |          |
| 7  | consequences included judgment from others    |                                                 |                     |                   |                           |                           |                |                           |          |
| 8  | as a result of use and "stoner" or "pothead"  |                                                 |                     |                   |                           |                           |                |                           |          |
| 9  | stereotypes (20, 32). Some patients reported  |                                                 |                     |                   |                           |                           |                |                           |          |
| 10 | that stigma affected the way they asked       |                                                 |                     |                   |                           |                           |                |                           |          |
| 11 | healthcare providers about cannabis as a      |                                                 |                     |                   |                           |                           |                |                           |          |
| 12 | treatment option, the ability to seek out     |                                                 |                     |                   |                           |                           |                |                           |          |
| 13 | medical cannabis as a treatment option, the   |                                                 |                     |                   |                           |                           |                |                           |          |
| 14 | location at which they purchased cannabis,    |                                                 |                     |                   |                           |                           |                |                           |          |
| 15 | and their ability to use cannabis in public.  |                                                 |                     |                   |                           |                           |                |                           |          |
| 16 | Patients who reported these factors tended to |                                                 |                     |                   |                           |                           |                |                           |          |
| 17 | take longer to seek out cannabis as a         |                                                 |                     |                   |                           |                           |                |                           |          |
| 18 | treatment option, conceal their use, and      |                                                 |                     |                   |                           |                           |                |                           |          |
| 19 | would not speak to healthcare providers       |                                                 |                     |                   |                           |                           |                |                           |          |
| 20 | about cannabis (32).                          |                                                 |                     |                   |                           |                           |                |                           |          |
| 21 |                                               |                                                 |                     |                   |                           |                           |                |                           |          |
| 22 |                                               |                                                 |                     |                   |                           |                           |                |                           |          |
| 23 |                                               |                                                 |                     |                   |                           |                           |                |                           |          |
| 24 | The cost, legal                               | [Quantitative]                                  | Quantitative        | 3 (2599)          | Serious risk              | Not serious               | Not serious    | Not serious               | Moderate |
| 25 | status, and                                   | Some patients were concerned about the cost     | (24,31), Mixed (35) |                   |                           | Not serious               | Not serious    | Not serious               |          |
| 26 | accessibility of                              | of medical cannabis and some were               |                     |                   |                           |                           |                |                           |          |
| 27 | medical                                       | concerned about the legal status and            |                     |                   |                           |                           |                |                           |          |
| 28 | cannabis                                      | accessibility of medical cannabis (31). Some    |                     |                   |                           |                           |                |                           |          |
| 29 | influenced                                    | patients reported that they would use           |                     |                   |                           |                           |                |                           |          |
| 30 | patients'                                     | medical cannabis if they had access to it (24). |                     |                   |                           |                           |                |                           |          |
| 31 | decisions to                                  | When making decisions about medical             |                     |                   |                           |                           |                |                           |          |
| 32 | use medical                                   | cannabis, the majority of patients relied on    |                     |                   |                           |                           |                |                           |          |
| 33 | cannabis.                                     | information from doctors, followed by the       |                     |                   |                           |                           |                |                           |          |
| 34 |                                               | internet and friends or family (31, 34).        |                     |                   |                           |                           |                |                           |          |
| 35 |                                               |                                                 |                     |                   |                           |                           |                |                           |          |
| 36 |                                               | [Mixed]                                         |                     |                   |                           |                           |                |                           |          |
| 37 | Some patients who were legal members of       |                                                 |                     |                   |                           |                           |                |                           |          |
| 38 | medical cannabis dispensaries were            |                                                 |                     |                   |                           |                           |                |                           |          |
| 39 |                                               |                                                 |                     |                   |                           |                           |                |                           |          |
| 40 |                                               |                                                 |                     |                   |                           |                           |                |                           |          |
| 41 |                                               |                                                 |                     |                   |                           |                           |                |                           |          |
| 42 |                                               |                                                 |                     |                   |                           |                           |                |                           |          |
| 43 |                                               |                                                 |                     |                   |                           |                           |                |                           |          |
| 44 |                                               |                                                 |                     |                   |                           |                           |                |                           |          |
| 45 |                                               |                                                 |                     |                   |                           |                           |                |                           |          |
| 46 |                                               |                                                 |                     |                   |                           |                           |                |                           |          |



1  
2  
3  
4  
5  
6  
7  
8  
9  
10  
11  
12  
13  
14  
15  
16  
17  
18  
19  
20  
21  
22  
23  
24  
25  
26  
27  
28  
29  
30  
31  
32  
33  
34  
35  
36  
37  
38  
39  
40  
41  
42  
43  
44  
45  
46

[Qualitative]

Some patients felt that the cost of medical cannabis was too high, potentially limiting their access (20), while some reported that the legalization of medical cannabis improved access and influenced their decisions to purchase medical cannabis for symptom relief (20). Other patients found changes in policies related to medical cannabis difficult to navigate and wanted assistance to access medical cannabis (23).

Qualitative (20, 23)

2 (196)

Moderate concerns

No or very minor concerns

No or very minor concerns

Minor concerns

No or very minor concerns

Moderate

**2.2 Factors influencing the choice of different preparations of medical cannabis**

1  
2  
3  
4  
5  
6  
7  
8  
9  
10  
11  
12  
13  
14  
15  
16  
17  
18  
19  
20  
21  
22  
23  
24  
25  
26  
27  
28  
29  
30  
31  
32  
33  
34  
35  
36  
37  
38  
39  
40  
41  
42  
43  
44  
45  
46

|                                                                                                                                                                                                              |                                                                                                                                                                                                                                                                                                                                                                                                                                                                                                                                             |                       |          |              |             |         |             |             |     |
|--------------------------------------------------------------------------------------------------------------------------------------------------------------------------------------------------------------|---------------------------------------------------------------------------------------------------------------------------------------------------------------------------------------------------------------------------------------------------------------------------------------------------------------------------------------------------------------------------------------------------------------------------------------------------------------------------------------------------------------------------------------------|-----------------------|----------|--------------|-------------|---------|-------------|-------------|-----|
| Patients chose medical cannabis products mainly based on cannabinoid content, recommendations from dispensary employees, described effects and side effects, cannabis variety, smell, and flower appearance. | [Quantitative ]<br>Most patients selected medical cannabis products based on cannabinoid content (e.g. THC), recommendations from dispensary employees, described effects, and cannabis variety (i.e. indica vs. sativa). A minority of patients selected cannabis based on visual properties and smell, and some patients were guided by recommendations from a friend, or name of the product. Recommendations from a medical professional was the least common factor that patients would consider when selecting medical cannabis (21). | Quantitative (21, 30) | 2 (2750) | Serious risk | Not serious | Serious | Not serious | Not serious | Low |
|                                                                                                                                                                                                              | When selecting medical cannabis products, patients consider the following factors: the most commonly factors were smell, delta 9-tetrahydrocannabinol (THC) content, hybrid indica/sativa species, indica species, how the flower looks (size, density of the flower, and/or trichome and shape, cannabidiol (CBD) content, and sativa species. Some patients reported varietal name as important factor for medical cannabis selection.(30)                                                                                                |                       |          |              |             |         |             |             |     |

1  
2  
3  
4  
5  
6  
7  
8  
9  
10  
11  
12  
13  
14  
15  
16  
17  
18  
19  
20  
21  
22  
23  
24  
25  
26  
27  
28  
29  
30  
31  
32  
33  
34  
35  
36  
37  
38  
39  
40  
41  
42  
43  
44  
45  
46

|                                                                                                                                                                                                                                                                                                                                                                                                                                                                                                    |                         |        |                           |                   |                           |                  |                           |     |
|----------------------------------------------------------------------------------------------------------------------------------------------------------------------------------------------------------------------------------------------------------------------------------------------------------------------------------------------------------------------------------------------------------------------------------------------------------------------------------------------------|-------------------------|--------|---------------------------|-------------------|---------------------------|------------------|---------------------------|-----|
| [Qualitative]                                                                                                                                                                                                                                                                                                                                                                                                                                                                                      | Qualitative (22, 23,28) | 3 (95) | No or very minor concerns | Moderate concerns | No or very minor concerns | Serious concerns | No or very minor concerns | Low |
| <p>One study reported that long lasting effect of medical cannabis positively influenced patients choice of medical cannabis product (22). Another two studies reported that patients’ uncertain about how they could determine which species of cannabis might work best to manage their pain and side effects of medical cannabis (e.g. headaches, disorientation or the sensation of feeling “stoned,” coughing) negatively influence patients choice of medical cannabis product (23, 28).</p> |                         |        |                           |                   |                           |                  |                           |     |

For peer review only

1  
2  
3  
4  
5  
6  
7  
8  
9  
10  
11  
12  
13  
14  
15  
16  
17  
18  
19  
20  
21  
22  
23  
24  
25  
26  
27  
28  
29  
30  
31  
32  
33  
34  
35  
36  
37  
38  
39  
40  
41  
42  
43  
44  
45  
46

|                                                                                                                                                                                                                                                                                                                                                                                                                                                                                                                                                                                                                                                                                                                                                                                                                                                                                                                                                                                                                                                                                                                                                                                                                                                                                                                                                                |                                                                                                                                                                                                                            |                          |                 |                     |                    |                    |                    |                    |                 |
|----------------------------------------------------------------------------------------------------------------------------------------------------------------------------------------------------------------------------------------------------------------------------------------------------------------------------------------------------------------------------------------------------------------------------------------------------------------------------------------------------------------------------------------------------------------------------------------------------------------------------------------------------------------------------------------------------------------------------------------------------------------------------------------------------------------------------------------------------------------------------------------------------------------------------------------------------------------------------------------------------------------------------------------------------------------------------------------------------------------------------------------------------------------------------------------------------------------------------------------------------------------------------------------------------------------------------------------------------------------|----------------------------------------------------------------------------------------------------------------------------------------------------------------------------------------------------------------------------|--------------------------|-----------------|---------------------|--------------------|--------------------|--------------------|--------------------|-----------------|
| <p>Gender, reason for use, and level of use experience influenced the factors patients considered when selecting cannabis products.</p> <p>A higher proportion of males selected cannabis products based on cannabinoid content (i.e. THC or CBD potency, ratio of THC and CBD), cannabis variety (i.e. indica or sativa), visual properties, and smell. A higher proportion of females consulted with a medical professional when choosing cannabis products. (21)</p> <p>Patients who use cannabis both medically and recreationally were more likely to select cannabis products based on THC or other cannabinoid content, cannabis variety, described effects, visual properties, smell, recommendation from friends, and the product name, while those who use cannabis medically were more likely use recommendations from dispensary employees or a medical professional. (21)</p> <p>Novice users were more likely to select a cannabis product based on dispensary recommendation consult with a medical professional than experienced users, while experienced users chose products based on nearly all other selection factors including smell, visual properties, described effects, cannabinoid content (i.e. THC or CBD potency, ratio of THC and CBD), cannabis variety (i.e. indica or sativa) and name of medical cannabis product (21).</p> | <p>[Quantitative]</p> <p>Selection of cannabis product were influenced by gender, reason for use (e.g., medical only vs. medical and recreational), and cannabis experience level (e.g., novice vs. experienced). (21)</p> | <p>Quantitative (21)</p> | <p>1 (1321)</p> | <p>Serious risk</p> | <p>Not serious</p> | <p>Not serious</p> | <p>Not serious</p> | <p>Not serious</p> | <p>Moderate</p> |
|----------------------------------------------------------------------------------------------------------------------------------------------------------------------------------------------------------------------------------------------------------------------------------------------------------------------------------------------------------------------------------------------------------------------------------------------------------------------------------------------------------------------------------------------------------------------------------------------------------------------------------------------------------------------------------------------------------------------------------------------------------------------------------------------------------------------------------------------------------------------------------------------------------------------------------------------------------------------------------------------------------------------------------------------------------------------------------------------------------------------------------------------------------------------------------------------------------------------------------------------------------------------------------------------------------------------------------------------------------------|----------------------------------------------------------------------------------------------------------------------------------------------------------------------------------------------------------------------------|--------------------------|-----------------|---------------------|--------------------|--------------------|--------------------|--------------------|-----------------|

1  
2  
3  
4  
5  
6  
7  
8  
9  
10  
11  
12  
13  
14  
15  
16  
17  
18  
19  
20  
21  
22  
23  
24  
25  
26  
27  
28  
29  
30  
31  
32  
33  
34  
35  
36  
37  
38  
39  
40  
41  
42  
43  
44  
45  
46

Abbreviations: CBD = cannabidiol; THC = delta-9-tetrahydrocannabinol.

For peer review only

## MOOSE Checklist for Meta-analyses of Observational Studies

| Item No                                     | Recommendation                                                                                                                                                                                                                                                               | Reported on Page No                        |
|---------------------------------------------|------------------------------------------------------------------------------------------------------------------------------------------------------------------------------------------------------------------------------------------------------------------------------|--------------------------------------------|
| Reporting of background should include      |                                                                                                                                                                                                                                                                              |                                            |
| 1                                           | Problem definition                                                                                                                                                                                                                                                           | 5                                          |
| 2                                           | Hypothesis statement                                                                                                                                                                                                                                                         | 5,6                                        |
| 3                                           | Description of study outcome(s)                                                                                                                                                                                                                                              | 6                                          |
| 4                                           | Type of exposure or intervention used                                                                                                                                                                                                                                        | 6                                          |
| 5                                           | Type of study designs used                                                                                                                                                                                                                                                   | 6                                          |
| 6                                           | Study population                                                                                                                                                                                                                                                             | 6                                          |
| Reporting of search strategy should include |                                                                                                                                                                                                                                                                              |                                            |
| 7                                           | Qualifications of searchers (eg, librarians and investigators)                                                                                                                                                                                                               | 7,8                                        |
| 8                                           | Search strategy, including time period included in the synthesis and key words                                                                                                                                                                                               | 7 & Appendix 1                             |
| 9                                           | Effort to include all available studies, including contact with authors                                                                                                                                                                                                      | 7                                          |
| 10                                          | Databases and registries searched                                                                                                                                                                                                                                            | 7                                          |
| 11                                          | Search software used, name and version, including special features used (eg, explosion)                                                                                                                                                                                      | 7,8                                        |
| 12                                          | Use of hand searching (eg, reference lists of obtained articles)                                                                                                                                                                                                             | 7                                          |
| 13                                          | List of citations located and those excluded, including justification                                                                                                                                                                                                        | 11 & Appendix 6                            |
| 14                                          | Method of addressing articles published in languages other than English                                                                                                                                                                                                      | 8                                          |
| 15                                          | Method of handling abstracts and unpublished studies                                                                                                                                                                                                                         | 8                                          |
| 16                                          | Description of any contact with authors                                                                                                                                                                                                                                      | n/a                                        |
| Reporting of methods should include         |                                                                                                                                                                                                                                                                              |                                            |
| 17                                          | Description of relevance or appropriateness of studies assembled for assessing the hypothesis to be tested                                                                                                                                                                   | 7,8                                        |
| 18                                          | Rationale for the selection and coding of data (eg, sound clinical principles or convenience)                                                                                                                                                                                | 9                                          |
| 19                                          | Documentation of how data were classified and coded (eg, multiple raters, blinding and interrater reliability)                                                                                                                                                               | 9                                          |
| 20                                          | Assessment of confounding (eg, comparability of cases and controls in studies where appropriate)                                                                                                                                                                             | n/a                                        |
| 21                                          | Assessment of study quality, including blinding of quality assessors, stratification or regression on possible predictors of study results                                                                                                                                   | 8,9                                        |
| 22                                          | Assessment of heterogeneity                                                                                                                                                                                                                                                  | 9,10                                       |
| 23                                          | Description of statistical methods (eg, complete description of fixed or random effects models, justification of whether the chosen models account for predictors of study results, dose-response models, or cumulative meta-analysis) in sufficient detail to be replicated | 9                                          |
| 24                                          | Provision of appropriate tables and graphics                                                                                                                                                                                                                                 | Figure 1, Tables 1 & 2, Supplementary File |
| Reporting of results should include         |                                                                                                                                                                                                                                                                              |                                            |
| 25                                          | Graphic summarizing individual study estimates and overall estimate                                                                                                                                                                                                          | n/a                                        |
| 26                                          | Table giving descriptive information for each study included                                                                                                                                                                                                                 | Table 1                                    |
| 27                                          | Results of sensitivity testing (eg, subgroup analysis)                                                                                                                                                                                                                       | n/a                                        |

|    |                                                   |         |
|----|---------------------------------------------------|---------|
| 28 | Indication of statistical uncertainty of findings | Table 2 |
|----|---------------------------------------------------|---------|

| Item No                                 | Recommendation                                                                                                            | Reported on Page No |
|-----------------------------------------|---------------------------------------------------------------------------------------------------------------------------|---------------------|
| Reporting of discussion should include  |                                                                                                                           |                     |
| 29                                      | Quantitative assessment of bias (eg, publication bias)                                                                    | n/a                 |
| 30                                      | Justification for exclusion (eg, exclusion of non-English language citations)                                             | 18                  |
| 31                                      | Assessment of quality of included studies                                                                                 | 16                  |
| Reporting of conclusions should include |                                                                                                                           |                     |
| 32                                      | Consideration of alternative explanations for observed results                                                            | 17,18               |
| 33                                      | Generalization of the conclusions (ie, appropriate for the data presented and within the domain of the literature review) | 18                  |
| 34                                      | Guidelines for future research                                                                                            | 18                  |
| 35                                      | Disclosure of funding source                                                                                              | 20                  |

From: Stroup DF, Berlin JA, Morton SC, et al, for the Meta-analysis Of Observational Studies in Epidemiology (MOOSE) Group. Meta-analysis of Observational Studies in Epidemiology. A Proposal for Reporting. *JAMA*. 2000;283(15):2008-2012. doi: 10.1001/jama.283.15.2008.

# BMJ Open

## Values and preferences towards medical cannabis among people living with chronic pain: A mixed methods systematic review

|                                 |                                                                                                                                                                                                                                                                                                                                                                                                                                                                                                                                                                                                                                                                                                   |
|---------------------------------|---------------------------------------------------------------------------------------------------------------------------------------------------------------------------------------------------------------------------------------------------------------------------------------------------------------------------------------------------------------------------------------------------------------------------------------------------------------------------------------------------------------------------------------------------------------------------------------------------------------------------------------------------------------------------------------------------|
| Journal:                        | <i>BMJ Open</i>                                                                                                                                                                                                                                                                                                                                                                                                                                                                                                                                                                                                                                                                                   |
| Manuscript ID                   | bmjopen-2021-050831.R1                                                                                                                                                                                                                                                                                                                                                                                                                                                                                                                                                                                                                                                                            |
| Article Type:                   | Original research                                                                                                                                                                                                                                                                                                                                                                                                                                                                                                                                                                                                                                                                                 |
| Date Submitted by the Author:   | 20-May-2021                                                                                                                                                                                                                                                                                                                                                                                                                                                                                                                                                                                                                                                                                       |
| Complete List of Authors:       | Zeng, Linan; West China Second University Hospital, ; McMaster University,<br>Lytvyn, Lyubov; McMaster University<br>Wang , Xiaoqin ; McMaster University<br>Kithulegoda, Natasha; Women's College Hospital<br>Agterberg, Silvana; Yeshiva University<br>Shergill, Yaad; McMaster University<br>Esfahani, Meisam; McMaster University<br>Heen, Anja; Innlandet Hospital Trust, Department of Medicine<br>Agoritsas, Thomas; McMaster University, Department of Clinical Epidemiology and Biostatistics; University Hospitals of Geneva, Division of General Internal Medicine & Division of Epidemiology<br>Guyatt, Gordon; McMaster University,<br>Busse, Jason; McMaster University, Anesthesia |
| <b>Primary Subject Heading</b>: | General practice / Family practice                                                                                                                                                                                                                                                                                                                                                                                                                                                                                                                                                                                                                                                                |
| Secondary Subject Heading:      | Patient-centred medicine, Qualitative research                                                                                                                                                                                                                                                                                                                                                                                                                                                                                                                                                                                                                                                    |
| Keywords:                       | QUALITATIVE RESEARCH, Pain management < ANAESTHETICS, GENERAL MEDICINE (see Internal Medicine)                                                                                                                                                                                                                                                                                                                                                                                                                                                                                                                                                                                                    |
|                                 |                                                                                                                                                                                                                                                                                                                                                                                                                                                                                                                                                                                                                                                                                                   |

SCHOLARONE™  
Manuscripts





I, the Submitting Author has the right to grant and does grant on behalf of all authors of the Work (as defined in the below author licence), an exclusive licence and/or a non-exclusive licence for contributions from authors who are: i) UK Crown employees; ii) where BMJ has agreed a CC-BY licence shall apply, and/or iii) in accordance with the terms applicable for US Federal Government officers or employees acting as part of their official duties; on a worldwide, perpetual, irrevocable, royalty-free basis to BMJ Publishing Group Ltd ("BMJ") its licensees and where the relevant Journal is co-owned by BMJ to the co-owners of the Journal, to publish the Work in this journal and any other BMJ products and to exploit all rights, as set out in our [licence](#).

The Submitting Author accepts and understands that any supply made under these terms is made by BMJ to the Submitting Author unless you are acting as an employee on behalf of your employer or a postgraduate student of an affiliated institution which is paying any applicable article publishing charge ("APC") for Open Access articles. Where the Submitting Author wishes to make the Work available on an Open Access basis (and intends to pay the relevant APC), the terms of reuse of such Open Access shall be governed by a Creative Commons licence – details of these licences and which [Creative Commons](#) licence will apply to this Work are set out in our licence referred to above.

Other than as permitted in any relevant BMJ Author's Self Archiving Policies, I confirm this Work has not been accepted for publication elsewhere, is not being considered for publication elsewhere and does not duplicate material already published. I confirm all authors consent to publication of this Work and authorise the granting of this licence.

1  
2  
3  
4  
5  
6  
7  
8  
9  
10  
11  
12  
13  
14  
15  
16  
17  
18  
19  
20  
21  
22  
23  
24  
25  
26  
27  
28  
29  
30  
31  
32  
33  
34  
35  
36  
37  
38  
39  
40  
41  
42  
43  
44  
45  
46  
47  
48  
49  
50  
51  
52  
53  
54  
55  
56  
57  
58  
59  
60

## Values and preferences towards medical cannabis among people living with chronic pain: A mixed methods systematic review

Linan Zeng <sup>1,2</sup>, PhD; Lyubov Lytvyn <sup>1</sup>, MSc, PhD; Xiaoqin Wang <sup>3</sup>, PhD; Natasha Kithulegoda <sup>4,5</sup>, MSc; Silvana Agterberg <sup>6</sup>, PhD(c); Yaad Shergill <sup>7</sup>, DC, MSc(c); Meisam Abdar Esfahani <sup>3</sup>, MD, MSc(c); Anja Fog Heen <sup>8</sup>, MD, PhD(c); Thomas Agoritsas <sup>1,9,10</sup>, MD, PhD; Gordon Guyatt <sup>1</sup>, MD, MSc; Jason W. Busse <sup>1,3,11,12,13</sup>, DC, PhD

### Author Affiliations:

1. Department of Health Research Methods, Evidence & Impact, McMaster University, Hamilton, Ontario, Canada
2. Pharmacy Department/Evidence-based Pharmacy Center, West China Second University Hospital, Chengdu, Sichuan, China
3. The Michael G. DeGroot Centre for Medicinal Cannabis Research, McMaster University, Hamilton, Ontario, Canada
4. Institute for Health Policy, Management and Evaluation, University of Toronto, Toronto, Ontario, Canada
5. Women's College Hospital, Toronto, Ontario, Canada
6. Ferkauf Graduate School of Psychology, Yeshiva University, Bronx, New York USA
7. One Elephant Integrative Health Team Inc.
8. Department of Medicine, Lovisenberg Diaconal Hospital, Oslo, Norway
9. Division of General Internal Medicine, Department of Medicine, Geneva University Hospitals, Switzerland
10. Department of Medicine, Faculty of Medicine, University of Geneva, Switzerland
11. Department of Anesthesia, McMaster University, Hamilton, Ontario, Canada
12. The Michael G. DeGroot National Pain Centre, McMaster University, Hamilton, Ontario, Canada
13. Chronic Pain Centre of Excellence for Canadian Veterans, Hamilton, Ontario, Canada

### \*Corresponding Author:

Jason W. Busse, Department of Anesthesia, Michael G. DeGroot School of Medicine, McMaster University, HSC-2V9, 1280 Main St. West, Hamilton, Canada, L8S 4K1  
Email: bussejw@mcmaster.ca

## Abstract

**Objective** To explore values and preferences towards medical cannabis among people living with chronic pain.

**Design** Mixed methods systematic review.

**Data sources** We searched MEDLINE, EMBASE, and PsycInfo from inception to March 17, 2020.

**Study selection** Pairs of reviewers independently screened search results and included quantitative, qualitative and mixed methods studies reporting values and preferences towards medical cannabis among people living with chronic pain.

**Review methods** We analyzed data using meta-narrative synthesis (quantitative findings were qualitized) and tabulated review findings according to identified themes. We used the GRADE approach to assess certainty of evidence.

**Results** Of 1,838 initial records, 15 studies proved eligible for review. High to moderate certainty evidence showed that patient's use of medical cannabis for chronic pain was influenced by both positive (e.g. support from friends and family) and negative social factors (e.g. stigma surrounding cannabis use). Most patients using medical cannabis favored products with balanced ratios of tetrahydrocannabinol (THC) and cannabidiol (CBD), or high levels of CBD, but not high THC preparations. Many valued the effectiveness of medical cannabis for symptom management even when experiencing adverse events related to concentration, memory, or fatigue. Reducing use of prescription medication was a motivating factor for use of medical cannabis, and concerns regarding addiction, losing control or acting strangely were disincentives. Out-of-pocket costs were a barrier, whereas legalization of medical cannabis improved access and incentivized

1  
2  
3 use.  
4

5           Low to very low certainty evidence suggested highly variable values towards  
6  
7  
8 medical cannabis among people living with chronic pain. Individuals with pain  
9  
10 related to life-limiting disease were more willing to use medical cannabis, and  
11  
12 preferred oral over inhaled administration.  
13  
14

15 **Conclusions** Our findings highlight factors that clinicians should consider when  
16  
17 discussing medical cannabis. The variability of patients' values and preferences  
18  
19 emphasize the need for shared decision making when considering medical cannabis  
20  
21 for chronic pain.  
22  
23  
24

25  
26  
27 **Systematic review registration:** The Open Science Framework (OSF)  
28  
29 (<https://osf.io/5d72w>).  
30  
31  
32

33  
34  
35 **Word count: 3126**  
36  
37  
38  
39  
40  
41  
42  
43  
44  
45  
46  
47  
48  
49  
50  
51  
52  
53  
54  
55  
56  
57  
58  
59  
60

### Strengths and limitations of this study

- Consideration of complementary bodies of evidence (qualitative, quantitative and mixed-methods) and use of the GRADE approach to assess the certainty of evidence provide greater confidence in the interpretation of results.
- Most eligible studies are from high-income countries, reflecting values and preferences of patients living in better health care service systems with health insurance coverage. The generalizability of our findings to other populations is uncertain.
- Studies eligible for this review failed to consistently report participants' socio-economic status, educational level, and religious beliefs, limiting exploration of the impact of these characteristics on values and preferences towards medical cannabis for chronic pain.

## INTRODUCTION

Chronic pain is the major cause of non-fatal disease burden worldwide,<sup>1</sup> and is estimated to affect one in five adults in the general global population<sup>2</sup> and one in three in low and middle-income countries.<sup>3</sup> Opioids are commonly prescribed for chronic pain; however, increasing awareness of modest benefits and risks of addiction, overdose and death have generated interest for alternative management strategies. Medical cannabis, whose two most studied active ingredients are delta-9-tetrahydrocannabinol (THC) and cannabidiol (CBD), is one such therapeutic alternative.<sup>4</sup> Moreover, the legalization of medical cannabis among more than 30 countries<sup>5</sup> has increased access for people living with chronic pain who are considering this option. Accordingly, physicians are increasingly faced with questions from patients about the potential role of medical cannabis in managing their pain.<sup>6</sup>

Physicians who seek guidance from current clinical practice guidelines regarding medical cannabis for chronic pain will find recommendations to be inconsistent. As examples, the UK's National Institute for Health and Care Excellence (NICE) recommends against prescribing cannabis-related products for chronic pain, citing its high cost and inadequate supporting evidence.<sup>7</sup> The American Academy of Neurology (ANN) recommends an oral cannabis extract containing both THC and CBD as having the highest level of empirical support as a treatment for chronic pain associated with multiple sclerosis.<sup>8</sup> These guidelines, and others, have neglected to systematically identify and incorporate target patients' values and preferences, which may affect their findings.

Understanding patients' values and preferences, defined as patient-important desirable and undesirable consequences weighed when making a recommendation,<sup>9</sup>

1  
2  
3 can improve the trustworthiness of recommendations. Therefore, we conducted a  
4  
5 systematic review investigating values and preferences towards the use of medical  
6  
7 cannabis among people living with chronic pain. This systematic review is part of the  
8  
9 BMJ Rapid Recommendations project, a collaborative effort from the MAGIC  
10  
11 Evidence Ecosystem Foundation ([www.magicevidence.org](http://www.magicevidence.org)) and the British Medical  
12  
13 Journal. This systematic review informed a parallel guideline published on [bmj.com](http://bmj.com)  
14  
15 and MAGICapp ([please insert link to guideline](#)).<sup>10</sup>  
16  
17  
18  
19  
20  
21  
22  
23  
24  
25  
26  
27  
28  
29  
30  
31  
32  
33  
34  
35  
36  
37  
38  
39  
40  
41  
42  
43  
44  
45  
46  
47  
48  
49  
50  
51  
52  
53  
54  
55  
56  
57  
58  
59  
60

## METHODS

We registered and published our study protocol on the Open Science Framework (OSF) (<https://osf.io/5d72w>) and adhered to the PRISMA (Preferred Reporting Items for Systematic reviews and Meta-Analyses) statement.

### Data source and Searches

We searched MEDLINE, EMBASE, and PsycInfo from inception to March 17, 2020, using a combination of search filters for retrieving studies on values and preferences towards cannabis use among people living with chronic pain (Appendix 1).<sup>11</sup> We reviewed reference lists of all included studies and relevant reviews to identify additional eligible studies.

### Study selection

We included quantitative, qualitative (including survey research that only reported qualitative findings) and mixed-methods studies that reported values and preferences of people living with chronic cancer or non-cancer pain, or their carers, on: 1) relative values or importance of outcomes related to medical cannabis use (e.g. improvements in pain and function, side effects) for chronic pain (defined as pain lasting three months or longer); 2) formulation of medical cannabis (e.g. administration routes, ingestion methods, ratios of THC to CBD); or 3) factors that influence the decision to use medical cannabis. If studies enrolled both acute and chronic pain patients, we considered them eligible if they reported outcomes of chronic pain patients separate from others, or if at least 80% of patients were affected by chronic pain.



1  
2  
3 We excluded studies that: 1) did not elicit data from patients or carers directly  
4  
5 (e.g. data elicited from health providers; information from databases of health  
6  
7 records); 2) only reported health state values or quality of life of people living with  
8  
9 chronic pain, not related to use of medical cannabis; 3) only reported correlation  
10  
11 analyses of associations among demographic variables, other patient characteristics,  
12  
13 and medical cannabis use for chronic pain; 4) case studies with less than 10 patients;  
14  
15 5) studies published in languages other than English, or 6) abstracts and literature  
16  
17 reviews.  
18  
19  
20  
21

22  
23 Before beginning each phase of the review process, we conducted calibration  
24  
25 exercises in which reviewers assessed the same two articles and discussed any  
26  
27 disagreements, leading to clarification and a common understanding of criteria and  
28  
29 process. After calibration, six paired reviewers (LZ & XW, NK & SA, YS & MA)  
30  
31 independently screened titles and abstracts of all retrieved references, and the full  
32  
33 text of articles deemed potentially eligible. We resolved disagreements by discussion  
34  
35 or consultation with an adjudicator (LL).  
36  
37  
38  
39  
40  
41

#### 42 **Data collection and risk of bias assessment**

43  
44 Three pairs of reviewers (LZ & XW, NK & SA, YS & MA) extracted data from eligible  
45  
46 studies, independently and in duplicate, for research questions, population  
47  
48 characteristics, design and methods of data collection, risk of bias or methodological  
49  
50 limitations, and main findings (Appendix 2). For main findings, we selected two  
51  
52 eligible articles per study design, identified key themes addressed in the studies, and  
53  
54 then coded the themes as different categories for main findings in the data  
55  
56 abstraction form (Appendix 2).<sup>12</sup> We resolved disagreements through discussion to  
57  
58  
59  
60

1  
2  
3 reach consensus, or in consultation with an adjudicator (LL).  
4

5 For quantitative studies, we used GRADE (Grading of Recommendations  
6 Assessment, Development and Evaluation) guidance for studies of values and  
7  
8 preferences to assess risk of bias of individual studies (Appendix 3).<sup>13</sup> For qualitative  
9  
10 studies, we used the Critical Appraisal Skills Programme (CASP) checklist to assess  
11  
12 methodological reporting quality of individual studies (Appendix 4).<sup>14</sup>  
13  
14  
15  
16  
17  
18  
19

### 20 **Data synthesis and analysis**

21  
22 Using an iterative process, we compared themes of the categories identified across  
23  
24 all studies and developed analytic themes.<sup>12</sup> We applied critical meta-narrative  
25  
26 synthesis, a modified form of critical interpretive synthesis, to transform quantitative  
27  
28 into qualitative data using systematic profiles and critical questions that are asked to  
29  
30 further extract narratives from the data.<sup>15,16</sup> To facilitate this transformation, we  
31  
32 applied four types of profiles to transform the extracted quantitative data that had  
33  
34 the potential to be qualitized, or converted into narratives (Table 1).<sup>12,16</sup> By using  
35  
36 inductive content analysis we synthesized the qualitized findings to produce review  
37  
38 findings which addressed the key themes.  
39  
40  
41  
42  
43  
44  
45

### 46 **Certainty of Evidence**

47  
48 For review findings from quantitative studies, we assessed the certainty of evidence  
49  
50 according to the five GRADE domains (i.e. risk of bias, imprecision, inconsistency,  
51  
52 indirectness, and small study effects)<sup>13,17,18</sup> For review findings from qualitative  
53  
54 studies, we assessed the certainty of evidence according to the five GRADE-CERQual  
55  
56 (Confidence in the Evidence from Reviews of Qualitative Research) domains (i.e.  
57  
58  
59  
60

1  
2  
3 methodological limitations, relevance, coherence, adequacy and dissemination  
4  
5 bias).<sup>19</sup> We initially considered the certainty of evidence as high, and if serious or  
6  
7 several minor or moderate concerns were detected in one or more domains, we  
8  
9 rated down certainty of evidence by one or more levels to moderate, low or very  
10  
11  
12  
13 low.

### 14 15 16 17 **Patient and public involvement**

18  
19 We engaged three people living with chronic pain, one of whom used medical  
20  
21 cannabis, to review our findings and advise if they were consistent with their  
22  
23 experiences. Led by the MAGIC Evidence Ecosystem Foundation, a BMJ RapidRec  
24  
25 panel of clinicians, methodologists and persons with lived experience of chronic pain  
26  
27 were responsible for developing clinical practice recommendations for medical  
28  
29 cannabis and chronic pain. Three patient partners were full members of the  
30  
31 guideline panel and received training and support to optimise contributions  
32  
33 throughout the guideline development process. The panel developed  
34  
35 recommendations using the GRADE framework, available online through the  
36  
37 MAGICapp ([please insert link to guideline](#)),<sup>10</sup> and considered evidence from  
38  
39 systematic reviews on the effectiveness of medical cannabis, adverse events related  
40  
41 to medical cannabis, opioid substitution with medical cannabis, and this review of  
42  
43 patients' values and preferences regarding medical cannabis to manage chronic pain.  
44  
45  
46  
47  
48  
49  
50  
51  
52  
53  
54  
55  
56  
57  
58  
59  
60

## RESULTS

Our search retrieved 1,838 records, of which 102 were deemed potentially eligible based on titles and abstracts. After full text screening, 15 studies (reported in 16 articles) proved eligible for review, including nine quantitative studies, five qualitative studies and one mixed method study (Figure 1, Appendix 5,6) <sup>20-35</sup>

### Study characteristics

Of the 15 studies, nine were conducted in the United States, two in the United Kingdom, two in Israel, one in Canada, and one in Australia. Four studies were conducted between 2000 and 2009, and 11 were conducted between 2010 and 2019. The number of participants ranged from 34 to 1,514 among quantitative studies, 18 to 150 in the qualitative studies, and 984 were enrolled in the mixed method study. All 15 studies included only chronic pain patients; no caregivers were enrolled. (Appendix 5)

Among the nine quantitative and one mixed method studies, four were at serious and one at critical risk of bias due to lack of valid representation of the outcomes (e.g. beneficial or harmful outcomes of medical cannabis), low response rate (less than 80%) and lack of reporting on how the authors confirmed participants' understanding of the measurement techniques (e.g. questionnaire) (Appendix 7).

Among the five qualitative studies, only one was at serious risk of bias due to inadequate research design and data collection, and lack of reporting on whether the relationship between researchers and participants had been adequately considered (Appendix 8).

## Findings

We identified two key themes: values and preferences towards medical cannabis for chronic pain (seven quantitative studies [2,185 participants]), three qualitative studies [95 participants], and one mixed method study [984 participants]) and factors that influenced patient's decisions regarding use of medical cannabis (seven quantitative studies [4,998 participants], five qualitative studies [263 participants], and one mixed method study [984 participants]). (Table 2, Appendix 9).

### *Use of medical cannabis for chronic pain*

Low certainty evidence showed that patients had mixed levels of willingness to use medical cannabis and most patients who used medical cannabis reported positive attitudes toward its use. Most patients with advanced life-limiting illnesses were comfortable using cannabis for pain<sup>25</sup>, while some other patients with chronic pain were unwilling or ambivalent about medical cannabis use<sup>26</sup>. Non-White patients with advanced illness were more concerned about medical cannabis compared to White patients, but they remained comfortable using medical cannabis<sup>25</sup>. People living with chronic pain who used medical cannabis believed it was effective for reducing their pain<sup>25 27 31 34</sup> and allowed them to reduce use of prescribed medications<sup>27</sup>. Two qualitative studies found similar results<sup>22 28</sup>.

### *Medical cannabis vs. other pain medicines*

Patients with histories of substance use preferred medical cannabis over prescription opioids (Low certainty).<sup>23</sup> Some patients endorsed that medical cannabis was safer than other analgesics, and such beliefs were more prevalent among non-Christians

1  
2  
3 and patients with colleges education or higher (Very low certainty).<sup>25</sup>  
4  
5  
6  
7

### 8 ***Different preparations of medical cannabis***

9

10 Moderate certainty evidence showed that most people living with chronic pain  
11 preferred using a blend of indica and sativa to manage their condition.<sup>21</sup> There was  
12  
13 no difference in the preference of cannabis strain between males and females, those  
14  
15 who used cannabis for medical purposes only and those who endorsed medical and  
16  
17 recreational use, or between novice and experienced users.<sup>21</sup>  
18  
19  
20  
21

22  
23 Most patients preferred medical cannabis products with either balanced ratios  
24  
25 of THC:CBD (37%) or high CBD formulations (46%), and only a minority (17%)  
26  
27 preferred high THC products (Moderate certainty).<sup>21 33</sup> Specifically, women, novice  
28  
29 users, or those who endorsed use of cannabis for medical purposes only were more  
30  
31 inclined to choose products with low THC and high CBD ratios, while males, those  
32  
33 endorsing use of cannabis for both medical and recreational purposes, and  
34  
35 experienced users preferred products with equal ratios of THC:CBD.<sup>21</sup>  
36  
37  
38  
39

40 Sex, reason for use, and experience with cannabis influenced preference towards  
41  
42 route of administration (Moderate certainty).<sup>21 35</sup> Compared to male patients,  
43  
44 women preferred to use tinctures and topical preparations as opposed to vaporizing  
45  
46 or smoking<sup>21</sup>. Patients who used cannabis both recreationally and medically  
47  
48 preferred smoking most, while those who used cannabis medically only preferred  
49  
50 vaporizing most.<sup>21</sup> Experienced cannabis users endorsed multiple routes of  
51  
52 administration compared with novice users who preferred vaporizing.<sup>21</sup> Most  
53  
54 patients with advanced life-limiting illness preferred oral formulations (non-inhaled)  
55  
56  
57 of medical cannabis.<sup>25</sup>  
58  
59  
60

### ***Factors influencing the decision to use medical cannabis***

High to moderate certainty evidence showed that most people living with chronic pain used medical cannabis for symptom relief.<sup>20 22 23 28 35</sup> Specifically, patients viewed medical cannabis as an effective approach to managing pain<sup>20 22 23 35</sup>, sleep, appetite, and nausea.<sup>[20, 35]</sup> Patients also reported that cannabis improved their emotional and mental well-being by reducing anxiety, depression and stress,<sup>20 35</sup> and increased their ability to focus and function<sup>28</sup>. Most patients reported that cannabis facilitated a state of relaxation in which pain remained present but was easier to tolerate<sup>28</sup>.

Moderate certainty evidence showed that factors related to patients' unwillingness to use medical cannabis include major side effects (e.g. losing control or acting strangely)<sup>20 23 26 27 31 34 35</sup>, addiction or tolerance<sup>26 27 31 34 35</sup>, and negative social consequences (e.g. stigma)<sup>25 26 31 34, 20 32 35</sup>. Older age was associated with greater hesitancy to use medical cannabis, as was concerns about negative opinions from others which might lead to relationship problems or disagreements with loved ones<sup>25 26 31 34</sup>. Some patients reported that stigma affected their comfort in asking healthcare providers about cannabis as a treatment option, and their willingness to use medical cannabis in a public setting<sup>32</sup>. Moderate certainty evidence showed that cost, legal status, and accessibility of medical cannabis also influenced use<sup>31 34 20 23-25 35</sup>.

### ***Factors influencing the choice of different preparations of medical cannabis***

Low certainty evidence suggested that most patients chose medical cannabis

1  
2  
3 products based on cannabinoid content (i.e. THC or CBD potency, ratio of THC and  
4  
5 CBD), recommendations from dispensary employees, described effects (e.g. pain  
6  
7 relief), strain of cannabis plant (i.e. sativa, indica, hybrid), smell, or varietal name.<sup>21 22</sup>  
8  
9  
10 <sup>23 28 30</sup> A higher proportion of males selected cannabis products based on cannabinoid  
11  
12 content, cannabis variety, visual properties, and smell, while a higher proportion of  
13  
14 females consulted with a medical professional when choosing cannabis products  
15  
16 (Moderate certainty).<sup>21</sup>  
17  
18  
19

20 Patients who used cannabis both medically and recreationally were more likely  
21  
22 to select cannabis products based on cannabinoid content, cannabis variety,  
23  
24 described effects, visual properties, smell, recommendations from friends, and the  
25  
26 product name, while those who only used cannabis medically were more likely to  
27  
28 prioritize recommendations from dispensary employees or medical professionals  
29  
30 (Moderate certainty).<sup>21</sup>  
31  
32  
33  
34  
35  
36  
37  
38  
39  
40  
41  
42  
43  
44  
45  
46  
47  
48  
49  
50  
51  
52  
53  
54  
55  
56  
57  
58  
59  
60



## DISCUSSION

Values and preferences among patients with chronic pain towards the use of medical cannabis are highly variable. Improvement of symptoms and reduction of prescription medications are important factors that positively influence patients' decision to use medical cannabis, while concerns about addiction, losing control, acting strangely and negative social consequences are associated with unwillingness to use medical cannabis. Cost, legal status and accessibility are also important factors. Patients who endorsed use of cannabis for only medical reasons preferred high CBD or similar ratios of THC: CBD products, whereas those endorsing use of both medical and recreational purposes were more likely to use higher THC products. Further, patients with chronic pain endorsing both medical and recreational use were more likely to prefer smoking cannabis, versus patients who endorsed only medical use who preferred vaporizing. Our findings were consistent across bodies of evidence (quantitative, qualitative, and mixed method studies). The certainty of evidence for most findings was moderate, predominantly due to risk of bias or imprecision/ adequacy.

We asked three patient partners on the BMJ rapid recommendation panel for their comments on the findings of this systematic review. In particular, 1) whether our findings reflected their experiences, and 2) if some of the findings were different from their experience, what were possible reasons? The patient partners agreed that all except one of our review findings (Table 2) reflected their experiences with cannabis. Specifically, they suggested that patients who are using medical cannabis may not receive support from family or friends due to stigma and misinformation about cannabis use.

Our findings that some patients select medical cannabis based on properties that

1  
2  
3 dispensers attributed to strain type (indica or sativa), represents an opportunity for  
4  
5 education. When these strains were originally characterized, sativa was shown to  
6  
7 produce higher amounts of CBD whereas indica strains of cannabis produced high  
8  
9 levels of THC. At present, however, commercially available cannabis plants and  
10  
11 products have been extensively interbred to produce a multitude of unique strains.<sup>36</sup>  
12  
13 As such, the only reliable way to determine the composition of any form of medical  
14  
15 cannabis is through accurate reporting of the cannabinoid (e.g. THC, CBD) content.  
16  
17

18  
19  
20 We found important differences between patients who use cannabis for medical  
21  
22 reasons only and those who report combined use (medical and recreational) in  
23  
24 preferences regarding cannabis content and route of administration. Observational  
25  
26 studies have shown that most consumers of cannabis endorse medical and  
27  
28 recreational use,<sup>37 38</sup> which presents a challenge to therapeutic use. Recreational  
29  
30 users often prioritize cannabis with high THC concentrations, a psychotropic  
31  
32 cannabinoid that is associated with greater harms than CBD.<sup>39 40</sup> Patients that use  
33  
34 cannabis for both medical and recreational purposes are also more likely to prefer  
35  
36 inhaled forms of administration, which has a much faster onset and greater  
37  
38 bioavailability than ingestion but also entails pulmonary risk factors due to inhalation  
39  
40 of toxins and particulate matter.<sup>41</sup> Therapeutic use of cannabis should prioritize  
41  
42 formulations supported by evidence, administered in a manner that prioritizes both  
43  
44 safety and effectiveness.  
45  
46  
47  
48  
49  
50

### 51 52 53 54 **Strengths and limitations of the review**

55  
56 Strengths of this review include explicit eligibility criteria, an extensive search strategy,  
57  
58 and duplicate assessment of eligibility and risk of bias. The use of complementary  
59  
60

1  
2  
3 bodies of evidence (qualitative, quantitative and mixed-methods) and the use of the  
4  
5 GRADE approach to assess the certainty of evidence allowed greater confidence in the  
6  
7 interpretation of results.  
8  
9

10 This study also had limitations. Most of the eligible studies (13 out of 15 studies)  
11  
12 are from high-income countries, reflecting values and preferences of patients living in  
13  
14 better health care service systems with health insurance coverage. The generalizability  
15  
16 of our findings to other populations is uncertain. In addition, we synthesized and  
17  
18 reported patients' willingness to use medical cannabis despite the limitation that most  
19  
20 studies did not provide participants with sufficient information about the benefits and  
21  
22 harms of medical cannabis. Studies failed to consistently report participants' socio-  
23  
24 economic status, educational level, and religious beliefs, limiting exploration of the  
25  
26 effect of these characteristics on values and preferences.  
27  
28  
29  
30  
31  
32  
33

### 34 **Implications**

35  
36 Our findings have direct implications for clinicians attending people living with chronic  
37  
38 pain who are considering use of medical cannabis. Benefits (effect on pain and  
39  
40 reduction of prescription medications), harms (adverse effects), burdens (negative  
41  
42 social consequences, cost) and accessibility (including legal status) of medical cannabis  
43  
44 all appear to influence patients' decisions related to use. However, we did not identify  
45  
46 any studies that considered how patients prioritized these factors. Subsequent  
47  
48 research should address this issue. In addition, how patient characteristics (e.g.  
49  
50 medical conditions, social economic status, religious beliefs) affect their values and  
51  
52 preferences is another issue worth addressing in subsequent research.  
53  
54  
55  
56  
57  
58  
59  
60

## CONCLUSIONS

There exists high variability of values and preferences towards medical cannabis among people living with chronic pain, particularly related to their willingness to use medical cannabis. These findings suggest that an individualized patient-centred approach, such as shared decision-making, should be emphasized for empowering patients to make choices that best suit their own values and preferences and accommodate their context.

1  
2  
3  
4  
5  
6  
7  
8  
9  
10  
11  
12  
13  
14  
15  
16  
17  
18  
19  
20  
21  
22  
23  
24  
25  
26  
27  
28  
29  
30  
31  
32  
33  
34  
35  
36  
37  
38  
39  
40  
41  
42  
43  
44  
45  
46  
47  
48  
49  
50  
51  
52  
53  
54  
55  
56  
57  
58  
59  
60

**Figure Legends**

Figure 1: Evidence search and selection

For peer review only

## Contributors

LZ, XW, NK, SA, YS and MAE identified and selected the studies. LZ, XW, NK, SA, YS and MAE collected the data. LZ, LL, XW, NK and SA analysed the data and assessed the certainty of the evidence. AFH, TA, GG and JWB provided advice at different stages. LZ, LL, XW, NK, SA drafted the manuscript. All authors revised the manuscript and approved the final version of the manuscript.

## Funding

XW is supported by a post-doctoral fellowship from the Michael G. DeGroot Institute for Pain Research & Care.

**Competing interests** None

**Ethical approval:** Ethics approval for this study was not required.

**Data sharing:** Raw data are available on request from the corresponding author.

**Acknowledgement** We thank Rachel Couban (McMaster University) for performing the literature search; we thank Ray Zhang (McMaster University) for providing consult with the certainty of evidence rating; we thank Shelly-Anne Li (University of Toronto) for providing suggestions on data synthesis; we thank our patient partners for providing comments on review findings.

## References

1. James SL, Abate D, Abate KH, et al. Global, regional, and national incidence, prevalence, and years lived with disability for 354 diseases and injuries for 195 countries and territories, 1990–2017: a systematic analysis for the Global Burden of Disease Study 2017. *The Lancet* 2018;392(10159):1789-858.
2. Goldberg DS, McGee SJ. Pain as a global public health priority. *BMC public health* 2011;11(1):1-5.
3. Jackson T, Thomas S, Stabile V, et al. Prevalence of chronic pain in low-income and middle-income countries: a systematic review and meta-analysis. *The Lancet* 2015;385:S10.
4. Hill KP. Medical marijuana for treatment of chronic pain and other medical and psychiatric problems: a clinical review. *Jama* 2015;313(24):2474-83.
5. Medical cannabis: bridging the evidence gap. Vol 1:e195.
6. Hill KP. Medical marijuana: more questions than answers. *Journal of psychiatric practice* 2014;20(5):389.
7. The National Institute for Health and Care Excellence (NICE) Cannabis-based medicinal products (NG144). 2019 (Available at: <https://www.nice.org.uk/guidance/ng144/chapter/Recommendations#chronic-pain> [accessed 7 March 2021])
8. Yadav V, Bever C, Bowen J, et al. Summary of evidence-based guideline: complementary and alternative medicine in multiple sclerosis: report of the guideline development subcommittee of the American Academy of Neurology. *Neurology* 2014;82(12):1083-92.

- 1  
2  
3 9. Guyatt GH, Haynes RB, Jaeschke RZ, et al. Users' guides to the medical literature:  
4  
5 XXV. Evidence-based medicine: principles for applying the users' guides to patient  
6  
7 care. *Jama* 2000;284(10):1290-96.  
8  
9
- 10  
11 10. Busse JW VP, Zeng L, et al. Medical cannabis for chronic pain: a clinical practice  
12  
13 guideline. *BMJ*
- 14  
15 11. Selva A, Solà I, Zhang Y, et al. Development and use of a content search strategy  
16  
17 for retrieving studies on patients' views and preferences. *Health and quality of life*  
18  
19 *outcomes* 2017;15(1):126.  
20  
21
- 22  
23 12. Valli C, Rabassa M, Johnston BC, et al. Health-related values and preferences  
24  
25 regarding meat consumption: a mixed-methods systematic review. *Annals of*  
26  
27 *Internal Medicine* 2019;171(10):742-55.  
28  
29
- 30  
31 13. Zhang Y, Alonso-Coello P, Guyatt GH, et al. GRADE Guidelines: 19. Assessing the  
32  
33 certainty of evidence in the importance of outcomes or values and preferences—  
34  
35 Risk of bias and indirectness. *Journal of clinical epidemiology* 2019;111:94-104.  
36  
37
- 38  
39 14. Critical Appraisal Skills Programme (2018) CASP Qualitative Research Checklist.  
40  
41 [online]. 2018
- 42  
43 15. Barnett-Page E, Thomas J. Methods for the synthesis of qualitative research: a  
44  
45 critical review. *BMC medical research methodology* 2009;9(1):1-11.  
46  
47
- 48  
49 16. Karimi M, Clark AM. How do patients' values influence heart failure self-care  
50  
51 decision-making?: A mixed-methods systematic review. *International journal of*  
52  
53 *nursing studies* 2016;59:89-104.  
54  
55
- 56  
57 17. Zhang Y, Coello PA, Guyatt GH, et al. GRADE guidelines: 20. Assessing the  
58  
59 certainty of evidence in the importance of outcomes or values and preferences—  
60



- 1  
2  
3 inconsistency, imprecision, and other domains. *Journal of clinical epidemiology*  
4  
5 2019;111:83-93.  
6  
7
- 8 18. Guyatt GH, Oxman AD, Schünemann HJ, et al. GRADE guidelines: a new series of  
9  
10 articles in the Journal of Clinical Epidemiology. *Journal of clinical epidemiology*  
11  
12 2011;64(4):380-82.  
13  
14
- 15 19. Lewin S, Bohren M, Rashidian A, et al. Applying GRADE-CERQual to qualitative  
16  
17 evidence synthesis findings—paper 2: how to make an overall CERQual  
18  
19 assessment of confidence and create a Summary of Qualitative Findings table.  
20  
21 *Implementation Science* 2018;13(1):10.  
22  
23
- 24 20. Bigand T, Anderson CL, Roberts ML, et al. Benefits and adverse effects of  
25  
26 cannabis use among adults with persistent pain. *Nursing outlook* 2019;67(3):223-  
27  
28 31.  
29  
30
- 31 21. Boehnke KF, Scott JR, Litinas E, et al. Cannabis use preferences and decision-  
32  
33 making among a cross-sectional cohort of medical cannabis patients with chronic  
34  
35 pain. *The Journal of Pain* 2019;20(11):1362-72.  
36  
37  
38
- 39 22. Bruce D, Brady JP, Foster E, et al. Preferences for medical marijuana over  
40  
41 prescription medications among persons living with chronic conditions:  
42  
43 Alternative, complementary, and tapering uses. *The Journal of Alternative and*  
44  
45 *Complementary Medicine* 2018;24(2):146-53.  
46  
47  
48
- 49 23. Cooke AC, Knight KR, Miaskowski C. Patients' and clinicians' perspectives of co-  
50  
51 use of cannabis and opioids for chronic non-cancer pain management in primary  
52  
53 care. *International Journal of Drug Policy* 2019;63:23-28.  
54  
55  
56  
57  
58  
59  
60

- 1  
2  
3 24. Degenhardt L, Lintzeris N, Campbell G, et al. Experience of adjunctive cannabis  
4 use for chronic non-cancer pain: findings from the Pain and Opioids IN Treatment  
5 (POINT) study. *Drug and alcohol dependence* 2015;147:144-50.  
6  
7  
8  
9  
10 25. Gallagher R, Best JA, Fyles G, et al. Attitudes and Beliefs About the Use of  
11 Cannabis for Symptom Control in a Palliative Population. *Journal of Cannabis*  
12 *Therapeutics* 2003;3(2):41-50.  
13  
14  
15  
16  
17 26. Gill A, Williams ACdC. Preliminary study of chronic pain patients' concerns about  
18 cannabinoids as analgesics. *The Clinical journal of pain* 2001;17(3):245-48.  
19  
20  
21  
22 27. Heng M, McTague MF, Lucas RC, et al. Patient perceptions of the use of medical  
23 marijuana in the treatment of pain after musculoskeletal trauma: a survey of  
24 patients at 2 trauma centers in Massachusetts. *Journal of Orthopaedic Trauma*  
25 2018;32(1):e25-e30.  
26  
27  
28  
29  
30  
31 28. Lavie-Ajayi M, Shvartzman P. Restored self: a phenomenological study of pain  
32 relief by cannabis. *Pain Medicine* 2019;20(11):2086-93.  
33  
34  
35  
36  
37 29. Rochford C, Edgeworth D, Hashim M, et al. Attitudes of Irish patients with  
38 chronic pain towards medicinal cannabis. *Irish Journal of Medical Science (1971-)*  
39 2019;188(1):267-72.  
40  
41  
42  
43  
44 30. Sexton M, Cuttler C, Finnell JS, et al. A cross-sectional survey of medical cannabis  
45 users: patterns of use and perceived efficacy. *Cannabis and cannabinoid research*  
46 2016;1(1):131-38.  
47  
48  
49  
50  
51 31. Zarrabi AJ, Welsh JW, Sniecinski R, et al. Perception of benefits and harms of  
52 medical cannabis among seriously ill patients in an outpatient palliative care  
53 practice. *Journal of Palliative Medicine* 2020;23(4):558-62.  
54  
55  
56  
57  
58  
59  
60

- 1  
2  
3 32. Satterlund TD, Lee JP, Moore RS. Stigma among California's medical marijuana  
4 patients. *Journal of psychoactive drugs* 2015;47(1):10-17.  
5  
6  
7  
8 33. Notcutt W, Price M, Miller R, et al. Initial experiences with medicinal extracts of  
9 cannabis for chronic pain: results from 34 'N of 1' studies. *Anaesthesia*  
10 2004;59(5):440-52.  
11  
12  
13 34. Singh V, Zarrabi AJ, Curseen KA, et al. Concerns of patients with cancer on  
14 accessing cannabis products in a state with restrictive medical marijuana laws: a  
15 survey study. *Journal of oncology practice* 2019;15(10):531-38.  
16  
17  
18 35. Piper BJ, Beals ML, Abess AT, et al. Chronic pain patients' perspectives of medical  
19 cannabis. *Pain* 2017;158(7):1373.  
20  
21  
22 36. Piomelli D, Russo EB. The Cannabis sativa versus Cannabis indica debate: an  
23 interview with Ethan Russo, MD. *Cannabis and cannabinoid research*  
24 2016;1(1):44-46.  
25  
26  
27 37. Turna J, Balodis I, Munn C, et al. Overlapping patterns of recreational and  
28 medical cannabis use in a large community sample of cannabis users.  
29  
30  
31 *Comprehensive Psychiatry* 2020:152188.  
32  
33  
34 38. Pacula RL, Jacobson M, Maksabedian EJ. In the weeds: a baseline view of  
35 cannabis use among legalizing states and their neighbours. *Addiction*  
36 2016;111(6):973-80.  
37  
38  
39 39. Cannabidiol (CBD) critical review report. Expert Committee on Drug Dependence  
40 Fortieth Meeting, Geneva; 2018.  
41  
42  
43 40. Hall W. What has research over the past two decades revealed about the adverse  
44 health effects of recreational cannabis use? *Addiction* 2015;110(1):19-35.  
45  
46  
47  
48  
49  
50  
51  
52  
53  
54  
55  
56  
57  
58  
59  
60

1  
2  
3 41. Marijuana Research Report (Revised July 2020): National Institute on Drug Abuse;  
4  
5 2020 [Available from: [https://www.drugabuse.gov/publications/research-](https://www.drugabuse.gov/publications/research-reports/marijuana/what-are-marijuanas-effects-lung-health)  
6  
7  
8 reports/marijuana/what-are-marijuanas-effects-lung-health.  
9  
10  
11  
12  
13  
14  
15  
16  
17  
18  
19  
20  
21  
22  
23  
24  
25  
26  
27  
28  
29  
30  
31  
32  
33  
34  
35  
36  
37  
38  
39  
40  
41  
42  
43  
44  
45  
46  
47  
48  
49  
50  
51  
52  
53  
54  
55  
56  
57  
58  
59  
60

For peer review only

**Table 1 Critical meta-narrative synthesis: from quantitative data to narratives**

| Systematic profiles <sup>a</sup> |                                                              |                                                                                                                                                                                                                                                                                                                                                                                                                                                                                                                                                                                              | Critical questions                                                                                                                                                                                                                                                                                                                                                                                                                                                                                                                                                                                                      |
|----------------------------------|--------------------------------------------------------------|----------------------------------------------------------------------------------------------------------------------------------------------------------------------------------------------------------------------------------------------------------------------------------------------------------------------------------------------------------------------------------------------------------------------------------------------------------------------------------------------------------------------------------------------------------------------------------------------|-------------------------------------------------------------------------------------------------------------------------------------------------------------------------------------------------------------------------------------------------------------------------------------------------------------------------------------------------------------------------------------------------------------------------------------------------------------------------------------------------------------------------------------------------------------------------------------------------------------------------|
| Technique                        | Focus                                                        | Example                                                                                                                                                                                                                                                                                                                                                                                                                                                                                                                                                                                      |                                                                                                                                                                                                                                                                                                                                                                                                                                                                                                                                                                                                                         |
| Modal profile                    | The most frequently occurring attributes                     | When asked to state the preference for route of administration: 86% (69/80) patients were comfortable with an oral form (pills, drops or added to food), while 15% (12/80) chose smoking .<br><b>This was qualitized as:</b> Most patients stated preference for oral formulations, while a minority preferred inhaled products.                                                                                                                                                                                                                                                             | What is this study trying to say about patients' values? Are patients' values and preferences explicitly identified? If so, what are they?<br>How do participants' answers to the questions provide insight into patients' values and preferences, and their influence on the choice of treatment for chronic pain?<br>How different (or similar) are patients' and carers' perspectives on medical cannabis for chronic pain?<br>Are there other individual or contextual factors (e.g., age, gender, socioeconomic status) that influence patients' values and preferences towards medical cannabis for chronic pain? |
| Average profile                  | Average of the particular variables                          | Patients' concerns regarding medical cannabis using a 10-point scale (0 = not concerned, 10= extremely concerned) were, in order of important: side effects (mean = 7.0±2.9), addiction (6.6±3.2), tolerance (6.2±3.2), losing control or acting strangely (6.2±3.3), and what family and friends may think (3.9±3.8).<br><b>This was qualitized as:</b> Patients were generally most concerned about the side effects of medical cannabis, followed by addiction, tolerance, losing control or acting strangely, and what family and friends may think.                                     |                                                                                                                                                                                                                                                                                                                                                                                                                                                                                                                                                                                                                         |
| Comparative profile              | A comparison of key outcomes                                 | Patients were asked to rate their values and concerns regarding use of cannabis (strongly agree, agree, disagree, strongly disagree and don't know). Significantly more males, vs. women, were concerned about cannabis being addictive (p =0.031), leading to the use of more harmful substances (p =0.036), and causing an inability to think clearly (p =0.008).<br><b>This was qualitized as:</b> Compared to females, significantly more males were concerned about cannabis being addictive, leading to the use of more harmful substances, and causing an inability to think clearly. |                                                                                                                                                                                                                                                                                                                                                                                                                                                                                                                                                                                                                         |
| Holistic profile                 | A combination of the modal, average and comparative profiles | Patients were asked to rate their willingness to use medical cannabis on a 0-10 point scale (0=extreme unwillingness to 10=extreme willingness). Greater unwillingness was associated with higher age (bivariate correlation coefficient [r]= 0.40; p=0.001), but not with pain intensity or duration, or sex.<br><b>This was qualitized as:</b> Higher age was related to more unwillingness to use medical cannabis.                                                                                                                                                                       |                                                                                                                                                                                                                                                                                                                                                                                                                                                                                                                                                                                                                         |

Note:

Abbreviation: SD: Standard deviation.

a. We used the following criteria when "qualitizing" quantitative into qualitative data:

1  
2  
3  
4  
5 “All or almost all”: Reported by over 90% of patients; “Most”: Reported by 75 to 90% of patients; “Majority”: Reported by 50 to 75% of patients; “Minority”:  
6 Reported by 25-50% of patients; “Some”: Reported by 10%-25% of patients; “None or almost none”: Reported by 10% or less of patients (if the sample was 100 or  
7 less)  
8 “Very few”: Reported by 10% or less of patients (if the sample was >100). "Most common" and "least common" were used when factors were reported in groups,  
9 to denote the factors that patients agreed with the most vs. the least. The criteria above did not apply in these cases (e.g. "Recommendations from a medical  
10 professional was the least influential factor among patients when selecting cannabis.").

11  
12  
13  
14  
15  
16  
17  
18  
19  
20  
21  
22  
23  
24  
25  
26  
27  
28  
29  
30  
31  
32  
33  
34  
35  
36  
37  
38  
39  
40  
41  
42  
43  
44  
45  
46

For peer review only

**Table 2 Review findings and certainty of evidence**

| Review Findings <sup>a</sup>                                                                                                                                                  | Type of Research Evidence: Reference number | Certainty of Evidence                                                   |
|-------------------------------------------------------------------------------------------------------------------------------------------------------------------------------|---------------------------------------------|-------------------------------------------------------------------------|
| <b>Values and preferences towards medical cannabis for chronic pain</b>                                                                                                       |                                             |                                                                         |
| <b>Use of medical cannabis for chronic pain</b>                                                                                                                               |                                             |                                                                         |
| Chronic pain patients had mixed levels of comfort or willingness to use medical cannabis.                                                                                     | Quantitative: 25,26,27                      | Low: Risk of bias and indirectness                                      |
|                                                                                                                                                                               | Qualitative: 22                             | Low: Minor concerns about relevance, serious adequacy concerns          |
| Most patients who use medical cannabis had a positive attitude toward its use for pain relief.                                                                                | Quantitative: 25,27, 29,31,34               | Low: Risk of bias and indirectness                                      |
|                                                                                                                                                                               | Qualitative: 28                             | Moderate: Serious adequacy concerns                                     |
| <b>Medical cannabis over other pain medicines</b>                                                                                                                             |                                             |                                                                         |
| Patients with chronic pain and substance use histories preferred medical cannabis over prescription opioids.                                                                  | Qualitative: 23                             | Low: Moderate methodological limitations and moderate adequacy concerns |
| Some patients believed that medical cannabis is safer than morphine and other strong pain killers.                                                                            | Quantitative: 25                            | Very low: Risk of bias, indirectness and imprecision                    |
| <b>Different preparations of medical cannabis</b>                                                                                                                             |                                             |                                                                         |
| <b><i>Cannabis variety (i.e. sativa, indica, hybrid)</i></b>                                                                                                                  |                                             |                                                                         |
| Most patients preferred medical cannabis with a blend of indica and sativa, regardless of gender, reasons for use, and cannabis experience level.                             | Quantitative: 21                            | Moderate: Risk of bias                                                  |
| <b><i>Cannabis content (i.e. THC or CBD potency, ratio of THC and CBD)</i></b>                                                                                                |                                             |                                                                         |
| A balanced ratio of THC:CBD was the most preferred preparation, but gender, reason for use, and cannabis experience level influenced patients' preference for cannabis ratio. | Quantitative: 21, 33                        | Moderate: Risk of bias                                                  |

|    |                                                                                     |                            |                                   |
|----|-------------------------------------------------------------------------------------|----------------------------|-----------------------------------|
| 1  |                                                                                     |                            |                                   |
| 2  |                                                                                     |                            |                                   |
| 3  |                                                                                     |                            |                                   |
| 4  |                                                                                     |                            |                                   |
| 5  | <b><i>Cannabis administration route</i></b>                                         |                            |                                   |
| 6  | Gender, reason for use and cannabis experience level                                | Quantitative: 21           | Moderate: Risk of bias            |
| 7  | influenced patients' preferred cannabis administration routes.                      | Mixed method: 35           |                                   |
| 8  | Most patients with advanced life-limiting illness                                   | Quantitative: 25           | Low: Risk of bias and imprecision |
| 9  | preferred an oral form (non-inhaled) of medical cannabis.                           |                            |                                   |
| 10 | <b>Factors that influenced patient's decision regarding use of medical cannabis</b> |                            |                                   |
| 11 | <b>Factors influenced the choice of medical cannabis use</b>                        |                            |                                   |
| 12 | Most patients used medical cannabis because it improved                             | Qualitative: 20,22,23,28   | High                              |
| 13 | symptoms associated with pain, mental health and other                              |                            |                                   |
| 14 | medical conditions.                                                                 |                            |                                   |
| 15 |                                                                                     |                            |                                   |
| 16 |                                                                                     | Mixed method: 35           | Moderate: Risk of bias            |
| 17 | Most patients were motivated to use medical cannabis to                             | Quantitative study: 27     | Moderate: Risk of bias            |
| 18 | reduce use of prescription medication.                                              | Qualitative study: 22      | Moderate: Moderate adequacy       |
| 19 |                                                                                     |                            | concerns                          |
| 20 | The majority of patients expressed that their cannabis use was                      | Quantitative: 25, 31,34    | Moderate: Risk of bias            |
| 21 | influenced by positive social consequences, such as social                          |                            |                                   |
| 22 | support from friends and family.                                                    |                            |                                   |
| 23 | Most patients expressed concerns with using medical                                 | Quantitative: 26, 27,31,34 | Moderate: Risk of bias            |
| 24 | cannabis, and described a range of adverse effects.                                 | Mixed method: 35           |                                   |
| 25 |                                                                                     | Qualitative : 20, 23       | Moderate: Moderate                |
| 26 |                                                                                     |                            | methodological concerns           |
| 27 |                                                                                     |                            |                                   |
| 28 | Most patients expressed that their cannabis use was                                 | Quantitative: 25,26, 31,34 | Moderate: Risk of bias            |
| 29 | influenced by negative social consequences, such as stigma.                         | Mixed method: 35           |                                   |
| 30 |                                                                                     | Qualitative: 20, 32        | Moderate: Moderate                |
| 31 |                                                                                     |                            | methodological limitations        |
| 32 | The cost, legal status, and accessibility of medical cannabis                       | Quantitative: 24,25, 31,34 | Moderate: Risk of bias            |
| 33 | influenced patients' decisions to use medical cannabis.                             | Mixed method: 35           |                                   |
| 34 |                                                                                     | Qualitative: 20, 23        | Moderate: Moderate                |
| 35 |                                                                                     |                            | methodological limitations        |
| 36 |                                                                                     |                            |                                   |
| 37 | <b>Factors influenced the choice of different preparations of medical cannabis</b>  |                            |                                   |
| 38 |                                                                                     |                            |                                   |
| 39 |                                                                                     |                            |                                   |
| 40 |                                                                                     |                            |                                   |
| 41 |                                                                                     |                            |                                   |
| 42 |                                                                                     |                            |                                   |
| 43 |                                                                                     |                            |                                   |
| 44 |                                                                                     |                            |                                   |
| 45 |                                                                                     |                            |                                   |
| 46 |                                                                                     |                            |                                   |



1  
2  
3  
4  
5  
6  
7  
8  
9  
10  
11  
12  
13  
14  
15  
16  
17  
18  
19  
20  
21  
22  
23  
24  
25  
26  
27  
28  
29  
30  
31  
32  
33  
34  
35  
36  
37  
38  
39  
40  
41  
42  
43  
44  
45  
46

Patients chose medical cannabis products mainly based on cannabinoid content, recommendations from dispensary employees, described effects and side effects, strain of cannabis plant, smell, and flower appearance.

Quantitative: 21, 30

Low: Risk of bias and indirectness

Qualitative: 22, 23, 28

Low: Moderate concerns about coherence and serious adequacy concerns

Gender, reason for use, and level of use experience were factors influencing patients' selection of cannabis products.

Quantitative: 21

Moderate: Risk of bias

Note:

Abbreviations: CBD: cannabidiol; THC: Delta-9-tetrahydrocannabinol.

- a. We used the following criteria when "qualitizing" quantitative into qualitative data:
  - "All or almost all": Reported by over 90% of patients;
  - "Most": Reported by 75 to 90% of patients;
  - "Majority": Reported by 50 to 75% of patients;
  - "Minority": Reported by 25-50% of patients;
  - "Some": Reported by 10%-25% of patients;
  - "None or almost none": Reported by 10% or less of patients (if the sample was 100 or less)
  - "Very few": Reported by 10% or less of patients (if the sample was 101 or more). "Most common" and "least common" were used when factors were reported in groups, to denote the factors that patients agreed with the most vs. the least. The criteria above did not apply in these cases (e.g. "Recommendations from a medical professional was the least influential factor among patients when selecting cannabis.").

Figure 1 Evidence search and selection



From: Moher D, Liberati A, Tetzlaff J, Altman DG, The PRISMA Group (2009). Preferred Reporting Items for Systematic Reviews and Meta-Analyses: The PRISMA Statement. PLoS Med 6(7): e1000097. doi:10.1371/journal.pmed1000097

1  
2  
3  
4  
5  
6  
7  
8  
9  
10  
11  
12  
13  
14  
15  
16  
17  
18  
19  
20  
21  
22  
23  
24  
25  
26  
27  
28  
29  
30  
31  
32  
33  
34  
35  
36  
37  
38  
39  
40  
41  
42  
43  
44  
45  
46

## Appendix 1 Search strategies and results in MEDLINE, Embase and PsycInfo

March 17, 2020

MEDLINE

Database: OVID Medline Epub Ahead of Print, In-Process & Other Non-Indexed Citations, Ovid MEDLINE(R) Daily and Ovid MEDLINE(R) 1946 to Present

Search Strategy:

-----

- 1 Cannabis/ (8934)
- 2 exp cannabinoids/ or cannabidiol/ or cannabinol/ or dronabinol/ (13763)
- 3 Endocannabinoids/ (5620)
- 4 exp Receptors, Cannabinoid/ (9222)
- 5 (Cannabis or cannabinol or cannabinoid\* or cannabidiol or bhang or cannador or charas or ganja or ganjah or hashish or hemp or marihuana or marijuana or nabilone or cesamet or cesametic or ajulemic acid or cannabichromene or cannabielsoin or cannabigerol or tetrahydrocannabinol or dronabinol or levonantradol or nabiximols or palmidrol or tetrahydrocannabinolic acid or tetrahydro cannabinol or marinol or tetranabinex or sativex or endocannabinoid\*).mp. (54746)
- 6 or/1-5 (54746)
- 7 "marijuana use"/ or marijuana smoking/ (5304)
- 8 Marijuana Abuse/ (6168)
- 9 (epidiolex or gwp 42003p or gwp42003p or nabidiolex or dronabinol or thc or tetrahydrocannabinol\* or ea 1477 or ea1477 or marinol or qcd 84924 or syndros or tetrabinex or tetranabinex or cesamet or nabilone or deltanyne or "abbott 40566" or namisol or dronabinolum or "QCD 84924" or "CCRIS 4726" or nabiximol? or "gw 1000" or gw1000 or "sab 378" or sab378 or sativex).mp. [mp=title, abstract, original title, name of substance word, subject heading word, floating sub-heading word, keyword heading word, organism supplementary concept word, protocol supplementary concept word, rare disease supplementary concept word, unique identifier, synonyms] (11622)
- 10 or/7-9 (20972)
- 11 or/1-10 (55952)
- 12 \*Attitude to Health/ (42364)
- 13 \*Patient Participation/ (14355)
- 14 \*Patient Preference/ (5009)
- 15 preference\*.ti,ab. (148469)
- 16 choice.ti. (31408)
- 17 choices.ti. (6250)
- 18 value.ti. (124160)
- 19 health state values.ti,ab. (175)
- 20 valuation\*.ti. (1523)

- 1  
2  
3  
4  
5 21 expectation\*.ti,ab. (85695)  
6 22 attitude\*.ti,ab. (144860)  
7 23 acceptab\*.ti,ab. (174183)  
8 24 knowledge.ti,ab. (676935)  
9 25 point of view.ti,ab. (41412)  
10 26 user participation.ti,ab. (243)  
11 27 users participation.ti,ab. (49)  
12 28 patient participation.ti,ab. (2134)  
13 29 patients participation.ti,ab. (589)  
14 30 patient perspective\*.ti,ab. (3526)  
15 31 patients perspective\*.ti,ab. (5820)  
16 32 user perspective\*.ti,ab. (466)  
17 33 users perspective\*.ti,ab. (513)  
18 34 patient perce\*.ti,ab. (5165)  
19 35 patients perce\*.ti,ab. (9776)  
20 36 health perception\*.ti,ab. (2652)  
21 37 user perce\*.ti,ab. (351)  
22 38 users perce\*.ti,ab. (786)  
23 39 user view\*.ti,ab. (110)  
24 40 users view\*.ti,ab. (369)  
25 41 patient view\*.ti,ab. (546)  
26 42 patients view\*.ti,ab. (2807)  
27 43 ((decision\* and mak\*).ti. or (decision mak\* or decisions mak\*).ti,ab.) and (patient\* or user\* or men or women).ti,ab. (73905)  
28 44 discrete choice\*.ti,ab. (1942)  
29 45 decision board\*.ti,ab. (45)  
30 46 decision analy\*.ti,ab. (7477)  
31 47 decision-support.ti,ab. (13930)  
32 48 decision tool\*.ti,ab. (808)  
33 49 decision aid\*.ti,ab. (2976)  
34 50 discrete-choice\*.ti,ab. (1942)  
35 51 \*Decision Making/ and (patient\* or user\* or men or women).ti. (5869)  
36 52 decision support techniques/ (19921)  
37  
38  
39  
40  
41  
42  
43  
44  
45  
46

- 1  
2  
3  
4  
5 53 (health and utilit\*).ti. (1434)  
6 54 gamble\*.ti,ab. (4395)  
7 55 prospect theory.ti,ab. (285)  
8 56 preference score.ti,ab. (163)  
9 57 preference elicitation.ti,ab. (179)  
10 58 health utilit\*.ti,ab. (2017)  
11 59 utility value\*.ti,ab. (1487)  
12 60 utility score\*.ti,ab. (1378)  
13 61 Utility estimate\*.ti,ab. (269)  
14 62 health state.ti,ab. (4119)  
15 63 feeling thermometer\*.ti,ab. (68)  
16 64 best-worst scaling.ti,ab. (202)  
17 65 standard gamble.ti,ab. (832)  
18 66 time trade-off.ti,ab. (1150)  
19 67 TTO.ti,ab. (1026)  
20 68 probability trade-off.ti,ab. (20)  
21 69 utility score.ti,ab. (507)  
22 70 preference based.ti,ab. (1291)  
23 71 preference score\*.ti,ab. (495)  
24 72 multiattribute.ti,ab. (337)  
25 73 multi attribute.ti,ab. (523)  
26 74 EuroQol 5D.ti,ab. (1268)  
27 75 EuroQol5D.ti,ab. (19)  
28 76 EQ5D.ti,ab. (550)  
29 77 EQ 5D.ti,ab. (7695)  
30 78 SF6D.ti,ab. (32)  
31 79 SF 6D.ti,ab. (753)  
32 80 HUI.ti,ab. (1169)  
33 81 15D.ti,ab. (1704)  
34 82 or/12-81 (1494263)  
35 83 (patient adj3 (value\* or preference\*)).ti,ab. (16093)  
36 84 (patient\* adj5 (report\* or relate\*) adj5 (outcome\* or measure\* or assess\*)).mp. (41519)  
37  
38  
39  
40  
41  
42  
43  
44  
45  
46

For peer review only

- 1  
2  
3  
4  
5 85 patient participation/ or doctor patient relation/ or nurse patient relationship/ or patient attitude/ or patient preference/ or patient satisfaction/ or patient  
6 compliance/ or medication compliance/ or patient decision making/ or patient education/ or chronic patient/ or attitude to health/ or "quality of life"/ or self  
7 care/ or self concept/ or self examination/ or adaptive behavior/ or coping behavior/ or coping.ab,ti. or needs assessment/ or personal autonomy/ or patient  
8 advocacy/ or life event/ (688791)
- 9 86 (patient\* adj3 (prefer\* or participat\* or involve\* or perspective\* or view\* or activat\* or empower\* or collaborate)).mp. [mp=title, abstract, original title, name  
10 of substance word, subject heading word, floating sub-heading word, keyword heading word, organism supplementary concept word, protocol supplementary  
11 concept word, rare disease supplementary concept word, unique identifier, synonyms] (154936)
- 12 87 (patient\* adj2 (attitude\* or decision\* or needs\*)).mp. [mp=title, abstract, original title, name of substance word, subject heading word, floating sub-heading  
13 word, keyword heading word, organism supplementary concept word, protocol supplementary concept word, rare disease supplementary concept word, unique  
14 identifier, synonyms] (32381)
- 15 88 expert patient\*.mp. (261)
- 16 89 (patient\* and (centre\* or center\* or focus\*)).mp. [mp=title, abstract, original title, name of substance word, subject heading word, floating sub-heading word,  
17 keyword heading word, organism supplementary concept word, protocol supplementary concept word, rare disease supplementary concept word, unique  
18 identifier, synonyms] (726322)
- 19 90 patient\*.mp. and (decision making/ or medical decision making/ or cooperation/ or distress syndrome/ or emotional stress/) [mp=title, abstract, original title,  
20 name of substance word, subject heading word, floating sub-heading word, keyword heading word, organism supplementary concept word, protocol  
21 supplementary concept word, rare disease supplementary concept word, unique identifier, synonyms] (44808)
- 22 91 or/83-90 (1481530)
- 23 92 82 or 91 (2686916)
- 24 93 11 and 92 (6739)
- 25 94 (chronic adj4 pain\*).mp. (68992)
- 26 95 Chronic Pain/ (13719)
- 27 96 exp Osteoarthritis/ (61921)
- 28 97 osteoarthrit\*.mp. (88211)
- 29 98 osteo-arthrit\*.mp. [mp=title, abstract, original title, name of substance word, subject heading word, floating sub-heading word, keyword heading word,  
30 organism supplementary concept word, protocol supplementary concept word, rare disease supplementary concept word, unique identifier, synonyms] (474)
- 31 99 exp Arthritis, Rheumatoid/ (111604)
- 32 100 exp Neuralgia/ (20041)
- 33 101 Diabetic Neuropathies/ (14472)
- 34 102 (neuropath\* adj5 pain\*).mp. [mp=title, abstract, original title, name of substance word, subject heading word, floating sub-heading word, keyword heading  
35 word, organism supplementary concept word, protocol supplementary concept word, rare disease supplementary concept word, unique identifier, synonyms]  
36 (24189)
- 37  
38  
39  
40  
41  
42  
43  
44  
45  
46

1  
2  
3  
4  
5  
6  
7  
8  
9  
10  
11  
12  
13  
14  
15  
16  
17  
18  
19  
20  
21  
22  
23  
24  
25  
26  
27  
28  
29  
30  
31  
32  
33  
34  
35  
36  
37  
38  
39  
40  
41  
42  
43  
44  
45  
46

- 103 neuralg\*.mp. (26998)  
104 zoster.mp. (20810)  
105 Irritable Bowel Syndrome/ (7099)  
106 IBS.mp. (8807)  
107 Migraine Disorders/ (24884)  
108 migraine\*.mp. (38930)  
109 Fibromyalgia/ (8287)  
110 Fibromyalg\*.mp. (11565)  
111 complex regional pain syndromes/ or causalgia/ or reflex sympathetic dystrophy/ (5486)  
112 Pain, Intractable/ (6166)  
113 Phantom Limb/ (1855)  
114 Hyperalgesia/ (11498)  
115 exp back pain/ or failed back surgery syndrome/ or low back pain/ (38351)  
116 radiculopath\*.mp. (9283)  
117 Musculoskeletal Pain/ (3090)  
118 Headache/ (27380)  
119 exp Headache Disorders/ (33884)  
120 headache\*.mp. (92254)  
121 exp Temporomandibular Joint Disorders/ (17098)  
122 whiplash.mp. (3942)  
123 Whiplash Injuries/ (3216)  
124 exp Cumulative Trauma Disorders/ (13612)  
125 exp Peripheral Nervous System Diseases/dt, rh, th [Drug Therapy, Rehabilitation, Therapy] (29519)  
126 Pain Measurement/de [Drug Effects] (6646)  
127 (backache\* or backpain\* or dorsalg\* or arthralgi\* or polyarthralgi\* or arthrodyni\* or myalgi\* or fibromyalgi\* or myodyn\* or neuralgi\* or ischialgi\* or crps or rachialgi\*).ti,ab. (44403)  
128 ((noncancer\* or non-cancer\* or back or discogen\* or chronic\* or recurrent or persist\* or bone or musculoskelet\* or muscle\* or skelet\* or spinal or spine or vertebra\* or joint\* or arthritis or Intestin\* or neuropath\* or neck or cervical\* or head or facial\* or complex or radicular or cervicobrachi\* or orofacial or somatic or non-malign\* or shoulder\* or knee\* or hip or hips) adj3 pain).mp. [mp=title, abstract, original title, name of substance word, subject heading word, floating sub-heading word, keyword heading word, organism supplementary concept word, protocol supplementary concept word, rare disease supplementary concept word, unique identifier, synonyms] (215471)  
129 or/94-128 (633956)

1  
2  
3  
4  
5 Annotation: chronic pain and painful conditions  
6 130 93 and 129 (343)  
7

8 Embase

9 Database: Embase <1974 to 2020 March 16>

10 Search Strategy:  
11 -----

12 1 cannabis/ (33753)  
13 2 exp cannabinoid/ (65425)  
14 3 medical cannabis/ (2094)  
15 4 exp cannabinoid receptor/ (14516)  
16 5 exp endocannabinoid/ (8544)  
17 6 (Cannabis or cannabiniol or cannabinoid\* or cannabidiol or bhang or cannador or charas or ganja or ganjah or hashish or hemp or marihuana or marijuana or  
18 nabilone or cesamet or cesametic or ajulemic acid or cannabichromene or cannabielsoin or cannabigerol or tetrahydrocannabinol or dronabinol or levonantradol or  
19 nabiximols or palmidrol or tetrahydrocannabinolic acid or tetrahydro cannabinol or marinol or tetranabinex or sativex or endocannabinoid\*).mp. [mp=title,  
20 abstract, heading word, drug trade name, original title, device manufacturer, drug manufacturer, device trade name, keyword, floating subheading word, candidate  
21 term word] (86218)  
22 7 cannabis addiction/ (9661)  
23 8 "cannabis use"/ or cannabis smoking/ (11097)  
24 9 (epidiolex or gwp 42003p or gwp42003p or nabidiolex or dronabinol or thc or tetrahydrocannabinol\* or ea 1477 or ea1477 or marinol or qcd 84924 or syndros  
25 or tetrabinex or tetranabinex or cesamet or nabilone or deltanyne or "abbott 40566" or namisol or dronabinolum or "QCD 84924" or "CCRIS 4726" or nabiximol? or  
26 "gw 1000" or gw1000 or "sab 378" or sab378 or sativex).mp. [mp=title, abstract, heading word, drug trade name, original title, device manufacturer, drug  
27 manufacturer, device trade name, keyword, floating subheading word, candidate term word] (19601)  
28 10 or/1-9 (89571)  
29 11 \*attitude to health/ (55489)  
30 12 \*patient participation/ (9554)  
31 13 \*patient preference/ (4523)  
32 14 preference\*.ti,ab. (180987)  
33 15 choice.ti. (36120)  
34 16 choices.ti. (7375)  
35 17 value.ti. (137715)  
36 18 health state values.ti,ab. (233)  
37  
38  
39  
40  
41  
42  
43  
44  
45  
46



1  
2  
3  
4  
5  
6  
7  
8  
9  
10  
11  
12  
13  
14  
15  
16  
17  
18  
19  
20  
21  
22  
23  
24  
25  
26  
27  
28  
29  
30  
31  
32  
33  
34  
35  
36  
37  
38  
39  
40  
41  
42  
43  
44  
45  
46

19 valuation\*.ti. (2249)  
20 expectation\*.ti,ab. (106912)  
21 attitude\*.ti,ab. (179875)  
22 acceptab\*.ti,ab. (240808)  
23 knowledge.ti,ab. (851427)  
24 point of view.ti,ab. (57170)  
25 user participation.ti,ab. (284)  
26 users participation.ti,ab. (52)  
27 patient participation.ti,ab. (2881)  
28 patients participation.ti,ab. (830)  
29 patient perspective\*.ti,ab. (5558)  
30 patients perspective\*.ti,ab. (8635)  
31 user perspective\*.ti,ab. (564)  
32 users perspective\*.ti,ab. (624)  
33 patient perce\*.ti,ab. (8096)  
34 patients perce\*.ti,ab. (14350)  
35 health perception\*.ti,ab. (3709)  
36 user perce\*.ti,ab. (400)  
37 users perce\*.ti,ab. (902)  
38 user view\*.ti,ab. (169)  
39 users view\*.ti,ab. (469)  
40 patient view\*.ti,ab. (865)  
41 patients view\*.ti,ab. (3932)  
42 ((decision\* and mak\*).ti. or (decision mak\* or decisions mak\*).ti,ab.) and (patient\* or user\* or men or women).ti,ab. (111434)  
43 discrete choice\*.ti,ab. (2789)  
44 decision board\*.ti,ab. (59)  
45 decision analy\*.ti,ab. (10602)  
46 decision-support.ti,ab. (18317)  
47 decision tool\*.ti,ab. (1271)  
48 decision aid\*.ti,ab. (4097)  
49 discrete-choice\*.ti,ab. (2789)  
50 \*Decision Making/ and (patient\* or user\* or men or women).ti. (5671)

For peer review only

- 1
- 2
- 3
- 4
- 5 51 (health and utilit\*).ti. (2083)
- 6 52 gamble\*.ti,ab. (5213)
- 7 53 prospect theory.ti,ab. (286)
- 8 54 preference score.ti,ab. (241)
- 9 55 preference elicitation.ti,ab. (261)
- 10 56 health utilit\*.ti,ab. (3331)
- 11 57 utility value\*.ti,ab. (2815)
- 12 58 utility score\*.ti,ab. (2530)
- 13 59 Utility estimate\*.ti,ab. (494)
- 14 60 health state.ti,ab. (6770)
- 15 61 feeling thermometer\*.ti,ab. (86)
- 16 62 best-worst scaling.ti,ab. (306)
- 17 63 standard gamble.ti,ab. (1081)
- 18 64 time trade-off.ti,ab. (1674)
- 19 65 TTO.ti,ab. (1635)
- 20 66 probability trade-off.ti,ab. (24)
- 21 67 utility score.ti,ab. (1024)
- 22 68 preference based.ti,ab. (1839)
- 23 69 preference score\*.ti,ab. (654)
- 24 70 multiattribute.ti,ab. (376)
- 25 71 multi attribute.ti,ab. (721)
- 26 72 EuroQol 5D.ti,ab. (2064)
- 27 73 EuroQol5D.ti,ab. (39)
- 28 74 EQ5D.ti,ab. (1812)
- 29 75 EQ 5D.ti,ab. (14809)
- 30 76 SF6D.ti,ab. (110)
- 31 77 SF 6D.ti,ab. (1370)
- 32 78 HUI.ti,ab. (1774)
- 33 79 15D.ti,ab. (2541)
- 34 80 decision support system/ (21812)
- 35 81 or/11-80 (1879990)
- 36 82 (patient adj3 (value\* or preference\*)).ti,ab. (25871)
- 37
- 38
- 39
- 40
- 41
- 42
- 43
- 44
- 45
- 46

For peer review only

1  
2  
3  
4  
5  
6  
7  
8  
9  
10  
11  
12  
13  
14  
15  
16  
17  
18  
19  
20  
21  
22  
23  
24  
25  
26  
27  
28  
29  
30  
31  
32  
33  
34  
35  
36  
37  
38  
39  
40  
41  
42  
43  
44  
45  
46

- 83 (patient\* adj5 (report\* or relate\*) adj5 (outcome\* or measure\* or assess\*)).mp. (73476)
- 84 patient participation/ or doctor patient relation/ or nurse patient relationship/ or patient attitude/ or patient preference/ or patient satisfaction/ or patient compliance/ or medication compliance/ or patient decision making/ or patient education/ or chronic patient/ or attitude to health/ or \*"quality of life"/ or self care/ or self concept/ or self examination/ or adaptive behavior/ or coping behavior/ or coping.ab,ti. or needs assessment/ or personal autonomy/ or patient advocacy/ or life event/ (1037242)
- 85 (patient\* adj3 (prefer\* or participat\* or involve\* or perspective\* or view\* or activat\* or empower\* or collaborate)).mp. [mp=title, abstract, heading word, drug trade name, original title, device manufacturer, drug manufacturer, device trade name, keyword, floating subheading word, candidate term word] (234656)
- 86 (patient\* adj2 (attitude\* or decision\* or needs\*)).mp. [mp=title, abstract, heading word, drug trade name, original title, device manufacturer, drug manufacturer, device trade name, keyword, floating subheading word, candidate term word] (119435)
- 87 expert patient\*.mp. (478)
- 88 (patient\* and (centre\* or center\* or focus\*)).mp. [mp=title, abstract, heading word, drug trade name, original title, device manufacturer, drug manufacturer, device trade name, keyword, floating subheading word, candidate term word] (1258089)
- 89 patient decision making/ (9864)
- 90 patient\*.mp. and (decision making/ or medical decision making/ or cooperation/ or distress syndrome/ or emotional stress/) [mp=title, abstract, heading word, drug trade name, original title, device manufacturer, drug manufacturer, device trade name, keyword, floating subheading word, candidate term word] (180387)
- 91 or/82-90 (2444470)
- 92 81 or 91 (3858388)
- 93 10 and 92 (13785)
- 94 (chronic adj4 pain\*).mp. [mp=title, abstract, heading word, drug trade name, original title, device manufacturer, drug manufacturer, device trade name, keyword, floating subheading word, candidate term word] (113744)
- 95 chronic pain/ (59665)
- 96 exp osteoarthritis/ (124667)
- 97 osteoarthrit\*.mp. (138729)
- 98 osteo-arthrit\*.mp. (511)
- 99 degenerative arthrit\*.mp. (1541)
- 100 exp rheumatoid arthritis/ (196173)
- 101 exp neuralgia/ (102320)
- 102 diabetic neuropathy/ (23303)
- 103 (neuropath\* adj5 (pain or diabet\*)).mp. [mp=title, abstract, heading word, drug trade name, original title, device manufacturer, drug manufacturer, device trade name, keyword, floating subheading word, candidate term word] (72882)
- 104 neuralg\*.mp. (29911)

- 1  
2  
3  
4  
5 105 zoster.mp. (37512)  
6 106 irritable colon/ (25493)  
7 107 (irritable bowel syndrome or IBS).mp. [mp=title, abstract, heading word, drug trade name, original title, device manufacturer, drug manufacturer, device  
8 trade name, keyword, floating subheading word, candidate term word] (24789)  
9 108 exp migraine/ (62395)  
10 109 migrain\*.mp. (69650)  
11 110 fibromyalgia/ (19936)  
12 111 fibromyalg\*.mp. (21561)  
13 112 reflex sympathetic dystrophy.mp. (2353)  
14 113 complex regional pain syndrome.mp. (7426)  
15 114 causalgia.mp. (1039)  
16 115 intractable pain/ (4766)  
17 116 phantom limb/ or phantom pain/ (2434)  
18 117 agnosia/ (3053)  
19 118 amputation stump/ (2062)  
20 119 exp hyperalgesia/ (20518)  
21 120 ((noncancer\* or non-cancer\* or chronic\* or recurrent or persist\* or non-malign\*) adj3 pain).mp. [mp=title, abstract, heading word, drug trade name, original  
22 title, device manufacturer, drug manufacturer, device trade name, keyword, floating subheading word, candidate term word] (130063)  
23 121 exp backache/ (106576)  
24 122 radiculopathy/ or radiculopath\*.mp. (13603)  
25 123 exp bone pain/ (17842)  
26 124 exp musculoskeletal pain/ (145426)  
27 125 arthralgia/ (59500)  
28 126 headache\*.mp. (271974)  
29 127 exp "headache and facial pain"/ (296382)  
30 128 temporomandibular joint disorder/ (13611)  
31 129 ((TMJ or TMJD) and pain\*).mp. [mp=title, abstract, heading word, drug trade name, original title, device manufacturer, drug manufacturer, device trade  
32 name, keyword, floating subheading word, candidate term word] (3753)  
33 130 whiplash.mp. or whiplash injury/ (4884)  
34 131 exp cumulative trauma disorder/ (20498)  
35 132 or/94-131 (1089097)  
36 133 93 and 132 (1409)  
37  
38  
39  
40  
41  
42  
43  
44  
45  
46

1  
2  
3  
4  
5  
6  
7  
8  
9  
10  
11  
12  
13  
14  
15  
16  
17  
18  
19  
20  
21  
22  
23  
24  
25  
26  
27  
28  
29  
30  
31  
32  
33  
34  
35  
36  
37  
38  
39  
40  
41  
42  
43  
44  
45  
46

## PsycInfo

Database: APA PsycInfo &lt;1806 to March Week 2 2020&gt;

## Search Strategy:

- 
- 1 exp cannabis/ or exp cannabinoids/ or tetrahydrocannabinol/ (12784)
  - 2 (Cannabis or cannabinol or cannabinoid\* or cannabidiol or bhang or cannador or charas or ganja or ganjah or hashish or hemp or marihuana or marijuana or nabilone or cesamet or cesametic or ajulemic acid or cannabichromene or cannabielsoin or cannabigerol or tetrahydrocannabinol or dronabinol or levonantradol or nabiximols or palmidrol or tetrahydrocannabinolic acid or tetrahydro cannabinol or marinol or tetranabinex or sativex or endocannabinoid\*).mp. [mp=title, abstract, heading word, table of contents, key concepts, original title, tests & measures, mesh] (26408)
  - 3 marijuana laws/ or marijuana legalization/ or "cannabis use disorder"/ or marijuana usage/ (3594)
  - 4 (epidiolex or gwp 42003p or gwp42003p or nabidiolex or dronabinol or thc or tetrahydrocannabinol\* or ea 1477 or ea1477 or marinol or qcd 84924 or syndros or tetrabinex or tetranabinex or cesamet or nabilone or deltanyne or "abbott 40566" or namisol or dronabinolum or "QCD 84924" or "CCRIS 4726" or nabiximol? or "gw 1000" or gw1000 or "sab 378" or sab378 or sativex).mp. [mp=title, abstract, heading word, table of contents, key concepts, original title, tests & measures, mesh] (3193)
  - 5 or/1-4 (26475)
  - 6 \*health attitudes/ (8084)
  - 7 \*client participation/ (1678)
  - 8 exp \*client attitudes/ (17349)
  - 9 preference\*.ti,ab. (95876)
  - 10 choice.ti. (21402)
  - 11 choices.ti. (4602)
  - 12 value.ti. (18077)
  - 13 health state values.ti,ab. (77)
  - 14 valuation\*.ti. (983)
  - 15 expectation\*.ti,ab. (80049)
  - 16 attitude\*.ti,ab. (201050)
  - 17 acceptab\*.ti,ab. (38902)
  - 18 knowledge.ti,ab. (290890)
  - 19 point of view.ti,ab. (20482)
  - 20 user participation.ti,ab. (282)
  - 21 users participation.ti,ab. (46)

- 1  
2  
3  
4  
5 22 patient participation.ti,ab. (788)  
6 23 patients participation.ti,ab. (264)  
7 24 patient perspective\*.ti,ab. (980)  
8 25 patients perspective\*.ti,ab. (1752)  
9 26 user perspective\*.ti,ab. (340)  
10 27 users perspective\*.ti,ab. (345)  
11 28 patient perce\*.ti,ab. (1343)  
12 29 patients perce\*.ti,ab. (3398)  
13 30 health perception\*.ti,ab. (1230)  
14 31 user perce\*.ti,ab. (393)  
15 32 users perce\*.ti,ab. (888)  
16 33 user view\*.ti,ab. (95)  
17 34 users view\*.ti,ab. (289)  
18 35 patient view\*.ti,ab. (210)  
19 36 patients view\*.ti,ab. (1022)  
20 37 ((decision\* and mak\*).ti. or (decision mak\* or decisions mak\*).ti,ab.) and (patient\* or user\* or men or women).ti,ab. (21062)  
21 38 discrete choice\*.ti,ab. (960)  
22 39 decision board\*.ti,ab. (16)  
23 40 decision analy\*.ti,ab. (1133)  
24 41 decision-support.ti,ab. (3235)  
25 42 decision tool\*.ti,ab. (169)  
26 43 decision aid\*.ti,ab. (1252)  
27 44 discrete-choice\*.ti,ab. (960)  
28 45 \*Decision Making/ and (patient\* or user\* or men or women).ti. (3428)  
29 46 (health and utilit\*).ti. (467)  
30 47 gamble\*.ti,ab. (5406)  
31 48 prospect theory.ti,ab. (964)  
32 49 preference score.ti,ab. (93)  
33 50 preference elicitation.ti,ab. (134)  
34 51 health utilit\*.ti,ab. (532)  
35 52 utility value\*.ti,ab. (490)  
36 53 utility score\*.ti,ab. (334)  
37  
38  
39  
40  
41  
42  
43  
44  
45  
46

1  
2  
3  
4  
5  
6  
7  
8  
9  
10  
11  
12  
13  
14  
15  
16  
17  
18  
19  
20  
21  
22  
23  
24  
25  
26  
27  
28  
29  
30  
31  
32  
33  
34  
35  
36  
37  
38  
39  
40  
41  
42  
43  
44  
45  
46

54 Utility estimate\*.ti,ab. (103)  
55 health state.ti,ab. (958)  
56 feeling thermometer\*.ti,ab. (58)  
57 best-worst scaling.ti,ab. (109)  
58 standard gamble.ti,ab. (210)  
59 time trade-off.ti,ab. (279)  
60 TTO.ti,ab. (190)  
61 probability trade-off.ti,ab. (5)  
62 utility score.ti,ab. (101)  
63 preference based.ti,ab. (648)  
64 preference score\*.ti,ab. (402)  
65 multiattribute.ti,ab. (531)  
66 multi attribute.ti,ab. (567)  
67 EuroQol 5D.ti,ab. (206)  
68 EuroQol5D.ti,ab. (0)  
69 EQ5D.ti,ab. (61)  
70 EQ 5D.ti,ab. (1677)  
71 SF6D.ti,ab. (10)  
72 SF 6D.ti,ab. (284)  
73 HUI.ti,ab. (445)  
74 15D.ti,ab. (170)  
75 decision support systems/ (3245)  
76 or/6-75 (744950)  
77 client attitudes/ or client satisfaction/ (21785)  
78 values/ or personal values/ or social values/ (22591)  
79 (patient\* adj3 (prefer\* or participat\* or involve\* or perspective\* or view\* or activat\* or empower\* or collaborate)).mp. (27273)  
80 (patient\* adj2 (attitude\* or decision\* or needs\*)).mp. (23750)  
81 or/77-80 (85433)  
82 76 or 81 (783705)  
83 5 and 82 (3282)  
84 chronic pain/ (13151)  
85 chronic illness/ and pain.mp. (916)

For peer review only

- 1  
2  
3  
4  
5 86 back pain/ (3813)  
6 87 ((chronic\* or persist\* or refractor\* or intract\* or manag\* or back) adj3 pain).mp. (34808)  
7 88 or/84-87 (35275)  
8 89 (chronic adj4 pain\*).mp. [mp=title, abstract, heading word, table of contents, key concepts, original title, tests & measures, mesh] (22123)  
9 90 exp arthritis/ (4140)  
10 91 osteoarthrit\*.mp. [mp=title, abstract, heading word, table of contents, key concepts, original title, tests & measures, mesh] (2121)  
11 92 osteo-arthrit\*.mp. [mp=title, abstract, heading word, table of contents, key concepts, original title, tests & measures, mesh] (9)  
12 93 degenerative arthrit\*.mp. [mp=title, abstract, heading word, table of contents, key concepts, original title, tests & measures, mesh] (15)  
13 94 exp Neuralgia/ (931)  
14 95 exp Neuropathy/ (6243)  
15 96 (neuropath\* adj5 (pain or diabet\*)).mp. [mp=title, abstract, heading word, table of contents, key concepts, original title, tests & measures, mesh] (6749)  
16 97 neuralg\*.mp. [mp=title, abstract, heading word, table of contents, key concepts, original title, tests & measures, mesh] (3310)  
17 98 zoster.mp. (577)  
18 99 irritable bowel syndrome/ (1152)  
19 100 (IBS or irritable colon or irritable bowel).mp. [mp=title, abstract, heading word, table of contents, key concepts, original title, tests & measures, mesh] (2001)  
20 101 exp headache/ (15176)  
21 102 migrain\*.mp. (12832)  
22 103 fibromyalgia/ (1972)  
23 104 fibromyalg\*.mp. [mp=title, abstract, heading word, table of contents, key concepts, original title, tests & measures, mesh] (3408)  
24 105 "complex regional pain syndrome (type i)"/ (152)  
25 106 (complex regional pain syndrome\* or causalgia).mp. [mp=title, abstract, heading word, table of contents, key concepts, original title, tests & measures, mesh]  
26 (821)  
27 107 somatosensory disorders/ (1367)  
28 108 hyperalgesi\*.mp. (5320)  
29 109 exp Somatoform Disorders/ (15194)  
30 110 ((noncancer\* or non-cancer\* or chronic\* or recurrent or persist\* or non-malign\*) adj3 pain).mp. [mp=title, abstract, heading word, table of contents, key  
31 concepts, original title, tests & measures, mesh] (23779)  
32 111 radiculopath\*.mp. [mp=title, abstract, heading word, table of contents, key concepts, original title, tests & measures, mesh] (351)  
33 112 ((back or musculoskeletal) adj3 pain\*).mp. [mp=title, abstract, heading word, table of contents, key concepts, original title, tests & measures, mesh] (7604)  
34 113 arthralgia.mp. [mp=title, abstract, heading word, table of contents, key concepts, original title, tests & measures, mesh] (317)  
35 114 headache\*.mp. [mp=title, abstract, heading word, table of contents, key concepts, original title, tests & measures, mesh] (22401)  
36 115 (backache\* or backpain or dorsalg\* or arthralgi\* or polyarthralgi\* or arthrodyn\* or myalgi\* or fibromyalg\* or myodny\* or neuralg\* or ischialg\* or crps or  
37  
38  
39  
40  
41  
42  
43  
44  
45  
46



1  
2  
3  
4  
5  
6  
7  
8  
9  
10  
11  
12  
13  
14  
15  
16  
17  
18  
19  
20  
21  
22  
23  
24  
25  
26  
27  
28  
29  
30  
31  
32  
33  
34  
35  
36  
37  
38  
39  
40  
41  
42  
43  
44  
45  
46

rachialgi\*).mp. [mp=title, abstract, heading word, table of contents, key concepts, original title, tests & measures, mesh] (8315)

116 ((back or discogen\* or bone or musculosket\* or muscle\* or skelet\* or spinal or spine or vertebra\* or joint\* or arthrit\* or intestin\* or neuropath\* or neck or cervical\* or head or facial\* or complex or radicular or cervicobrach\* or orofacial or somatic or shoulder\* or knee\* or hip or hips\*) adj3 pain).mp. [mp=title, abstract, heading word, table of contents, key concepts, original title, tests & measures, mesh] (20949)

117 or/84-116 (93580)

118 83 and 117 (86)

119 5 and 82 and 117 (86)

For peer review only

**Appendix 2 Data extraction form**

|                                                                                                                                                                                                                                                                                                                                                                                                                                                                                                                                 |
|---------------------------------------------------------------------------------------------------------------------------------------------------------------------------------------------------------------------------------------------------------------------------------------------------------------------------------------------------------------------------------------------------------------------------------------------------------------------------------------------------------------------------------|
| <b>Researcher identification</b>                                                                                                                                                                                                                                                                                                                                                                                                                                                                                                |
| Surname, name                                                                                                                                                                                                                                                                                                                                                                                                                                                                                                                   |
| <b>Study identification</b>                                                                                                                                                                                                                                                                                                                                                                                                                                                                                                     |
| Study ID                                                                                                                                                                                                                                                                                                                                                                                                                                                                                                                        |
| Country                                                                                                                                                                                                                                                                                                                                                                                                                                                                                                                         |
| Funding                                                                                                                                                                                                                                                                                                                                                                                                                                                                                                                         |
| <b>Study objectives or research questions</b>                                                                                                                                                                                                                                                                                                                                                                                                                                                                                   |
| <b>Study population</b>                                                                                                                                                                                                                                                                                                                                                                                                                                                                                                         |
| Description of patients                                                                                                                                                                                                                                                                                                                                                                                                                                                                                                         |
| Response rate/ completion rate                                                                                                                                                                                                                                                                                                                                                                                                                                                                                                  |
| Male %                                                                                                                                                                                                                                                                                                                                                                                                                                                                                                                          |
| Age                                                                                                                                                                                                                                                                                                                                                                                                                                                                                                                             |
| White %                                                                                                                                                                                                                                                                                                                                                                                                                                                                                                                         |
| Chronic pain %                                                                                                                                                                                                                                                                                                                                                                                                                                                                                                                  |
| Patients ever used cannabis %                                                                                                                                                                                                                                                                                                                                                                                                                                                                                                   |
| Opioids use %                                                                                                                                                                                                                                                                                                                                                                                                                                                                                                                   |
| <b>Aim intervention</b>                                                                                                                                                                                                                                                                                                                                                                                                                                                                                                         |
| <b>Study design and methods</b>                                                                                                                                                                                                                                                                                                                                                                                                                                                                                                 |
| Study design                                                                                                                                                                                                                                                                                                                                                                                                                                                                                                                    |
| Sampling                                                                                                                                                                                                                                                                                                                                                                                                                                                                                                                        |
| Sample size                                                                                                                                                                                                                                                                                                                                                                                                                                                                                                                     |
| Data collection                                                                                                                                                                                                                                                                                                                                                                                                                                                                                                                 |
| <b>Findings</b>                                                                                                                                                                                                                                                                                                                                                                                                                                                                                                                 |
| Main findings (themes)                                                                                                                                                                                                                                                                                                                                                                                                                                                                                                          |
| <ol style="list-style-type: none"> <li>1. Values and preferences of outcome of medical cannabis <ol style="list-style-type: none"> <li>1.1 Relative value or importance patients put on outcomes of medical cannabis;</li> <li>1.2 Tradeoff between benefits and harms or burdens of medical cannabis</li> </ol> </li> <li>2. Values and preferences towards medical cannabis <ol style="list-style-type: none"> <li>2.1 Values and preference for or against medical cannabis or choosing cannabis over</li> </ol> </li> </ol> |

1  
2  
3  
4  
5  
6  
7  
8  
9  
10  
11  
12  
13  
14  
15  
16  
17  
18  
19  
20  
21  
22  
23  
24  
25  
26  
27  
28  
29  
30  
31  
32  
33  
34  
35  
36  
37  
38  
39  
40  
41  
42  
43  
44  
45  
46

|                                                                                                                                              |
|----------------------------------------------------------------------------------------------------------------------------------------------|
| other medicines                                                                                                                              |
| 2.2 Values and preferences of different preparations of medical cannabis (e.g. administration routes, ingestion method, ratio of THC to CBD) |
| 3. Factors that influence the decision making regarding medical cannabis use                                                                 |
| 3.1 Factors that influence use or not use of medical cannabis                                                                                |
| 3.2 Factors that influence the choice of medical cannabis over other meds for pain management                                                |
| 3.3 Factors that influence the choice of different preparations of medical cannabis                                                          |
| Authors' interpretation                                                                                                                      |
| Authors' conclusions                                                                                                                         |

**Appendix 3 Tool and instructions for risk of bias assessment for quantitative studies**

| <b>Domains</b>                    | Participant selection                                                                                                                                                                                                                      | Completeness of data                                                                  | Choice of measurement instrument                                                                                                                                 | Administration of measurement instrument                                                                                           | Outcome/health state presentation                                                                                                                                                                               | Participants' understanding of the measurement instrument                                                                                     | Data analysis                                                                                                                        | Overall risk of bias                                                                                                                                                                                                    |
|-----------------------------------|--------------------------------------------------------------------------------------------------------------------------------------------------------------------------------------------------------------------------------------------|---------------------------------------------------------------------------------------|------------------------------------------------------------------------------------------------------------------------------------------------------------------|------------------------------------------------------------------------------------------------------------------------------------|-----------------------------------------------------------------------------------------------------------------------------------------------------------------------------------------------------------------|-----------------------------------------------------------------------------------------------------------------------------------------------|--------------------------------------------------------------------------------------------------------------------------------------|-------------------------------------------------------------------------------------------------------------------------------------------------------------------------------------------------------------------------|
| <b>Questions</b>                  | Was the study sample selected in a manner to ensure the representativeness to the target population?                                                                                                                                       | Was the attrition sufficiently low to minimize the risk of bias?                      | Was the choice of the methodology appropriate for addressing the study aim?                                                                                      | Was the instrument (or tools that was used to elicit values and preferences, e.g. questionnaire) administered in the intended way? | Was a valid representation of the outcome/health state (e.g. a state of pain relief - a beneficial outcome of medical cannabis, or an experience of coughing - a harmful outcome of medical cannabis) utilized? | Did the researchers check the understanding to the measurement techniques (e.g. questionnaire in a survey)?                                   | Were the results analyzed appropriately?                                                                                             |                                                                                                                                                                                                                         |
| <b>Instructions for questions</b> | The sampling strategy solely does not determine the risk of bias; if there is a subset of the population more or less likely to be reached, the answer for "was the study sample selected in a manner to ensure the representativeness" is | Response rate for 80% or higher would be considered high for a cross-sectional study. | Consider yes or probably yes for the following methodologies: standard gamble, time trade off, visual analogue scale (or feeling thermometers), discrete choice, | -                                                                                                                                  | If the researchers demonstrated they were using available evidence to support the health state presentation, the answer should be yes or probably yes.                                                          | If the methodology is simple, choosing "the investigators did not formally test the understanding, but the results suggested it was adequate" | To answer this question, reviewers also need to consider whether the adjustment, stratification, or model selection was appropriate. | · Low risk of bias= The study is classified as with low risk of bias across subdomains.<br>· Moderate risk of bias= The study is classified as low (Yes -> low risk of bias) or moderate (Probably yes -> moderate risk |

1  
2  
3  
4  
5  
6  
7  
8  
9  
10  
11  
12  
13  
14  
15  
16  
17  
18  
19  
20  
21  
22  
23  
24  
25  
26  
27  
28  
29  
30  
31  
32  
33  
34  
35  
36  
37  
38  
39  
40  
41  
42  
43  
44  
45  
46

yes or probably yes.

treatment  
trade-off,  
willingness to  
pay

could be  
appropriate.  
If the  
researchers  
piloted the  
methodology,  
choosing "the  
investigators  
did not formally  
test the  
understanding,  
but the results  
suggested it  
was adequate"  
may also be  
appropriate.

This domain  
may not be  
applicable to  
all primary  
studies  
because not  
all studies will  
require  
controlled  
data analysis.  
Please check  
"NA" if not  
applicable.

of bias) risk of bias  
across subdomains.  
· Serious risk of  
bias= The study is  
classified as serious  
risk of bias (Probably  
no -> serious risk of  
bias) for at least one  
subdomain but not  
classified as critical  
risk of bias for any  
subdomain.  
· Critical risk of  
bias=The study is  
classified as critical  
risk of bias (No ->  
critical risk of bias)  
for at least one  
subdomain.

For peer review only

**Appendix 4 Tool and instructions for methodological limitation assessments for qualitative studies**

| Domains                           | Aim of the research                                                                                                                                    | Qualitative methodology appropriateness                                                                                                                                                                                                                           | Research design                                                                                                                                                         | Appropriate recruitment strategy                                                                                                                                                                                            | Data collection                                                                                                                                                                                                                            | Investigator-participant relationship                                                                                                                                                                                         | Ethical issues                                                                                                                                                                                                                                                                 | Data analysis                                                                                                                                                                                                                                                                                      | Findings                                                                                                                                                                                    | Value of the research                                                                                                                                                                                                                                                                                    | Overall methodological limitations                                                                                                                                                                          |
|-----------------------------------|--------------------------------------------------------------------------------------------------------------------------------------------------------|-------------------------------------------------------------------------------------------------------------------------------------------------------------------------------------------------------------------------------------------------------------------|-------------------------------------------------------------------------------------------------------------------------------------------------------------------------|-----------------------------------------------------------------------------------------------------------------------------------------------------------------------------------------------------------------------------|--------------------------------------------------------------------------------------------------------------------------------------------------------------------------------------------------------------------------------------------|-------------------------------------------------------------------------------------------------------------------------------------------------------------------------------------------------------------------------------|--------------------------------------------------------------------------------------------------------------------------------------------------------------------------------------------------------------------------------------------------------------------------------|----------------------------------------------------------------------------------------------------------------------------------------------------------------------------------------------------------------------------------------------------------------------------------------------------|---------------------------------------------------------------------------------------------------------------------------------------------------------------------------------------------|----------------------------------------------------------------------------------------------------------------------------------------------------------------------------------------------------------------------------------------------------------------------------------------------------------|-------------------------------------------------------------------------------------------------------------------------------------------------------------------------------------------------------------|
| <b>Questions</b>                  | Was there a clear statement of the aims of the research?                                                                                               | Is a qualitative methodology appropriate?                                                                                                                                                                                                                         | Was the research design appropriate to address the aims of the research?                                                                                                | Was the recruitment strategy appropriate to the aims of the research?                                                                                                                                                       | Was the data collected in a way that addressed the research issue?                                                                                                                                                                         | Has the relationship between researcher and participants been adequately considered?                                                                                                                                          | Have ethical issues been taken into consideration?                                                                                                                                                                                                                             | Was the data analysis sufficiently rigorous?                                                                                                                                                                                                                                                       | Is there a clear statement of findings?                                                                                                                                                     | How valuable is the research?                                                                                                                                                                                                                                                                            |                                                                                                                                                                                                             |
| <b>Instructions for questions</b> | <ul style="list-style-type: none"> <li>· what was the goal of the research</li> <li>· why it was thought important</li> <li>· its relevance</li> </ul> | <ul style="list-style-type: none"> <li>· If the research seeks to interpret or illuminate the actions and/or subjective experiences of research participants</li> <li>· Is qualitative research the right methodology for addressing the research goal</li> </ul> | <ul style="list-style-type: none"> <li>· if the researcher has justified the research design (e.g. have they discussed how they decided which method to use)</li> </ul> | <ul style="list-style-type: none"> <li>· If the researcher has explained how the participants were selected</li> <li>· If they explained why the participants they selected were the most appropriate to provide</li> </ul> | <ul style="list-style-type: none"> <li>· If the setting for the data collection was justified</li> <li>· If it is clear how data were collected</li> <li>· If the researcher has justified the methods chosen</li> <li>· If the</li> </ul> | <ul style="list-style-type: none"> <li>· If the researcher critically examined their own role, potential bias and influence during (a) formulation of the research questions (b) data collection, including sample</li> </ul> | <ul style="list-style-type: none"> <li>· If there are sufficient details of how the research was explained to participants for the reader to assess whether ethical standards were maintained</li> <li>· If the researcher has discussed issues raised by the study</li> </ul> | <ul style="list-style-type: none"> <li>· If there is an in-depth description of the analysis process</li> <li>· If thematic analysis is used. If so, is it clear how the categories/themes were derived from the data</li> <li>· Whether the researcher explains how the data presented</li> </ul> | <ul style="list-style-type: none"> <li>· If the findings are explicit</li> <li>· If there is adequate discussion of the evidence both for and against the researcher's arguments</li> </ul> | <ul style="list-style-type: none"> <li>· If the researcher discusses the contribution the study makes to existing knowledge or understanding (e.g. do they consider the findings in relation to current practice or policy, or relevant research-based literature</li> <li>· If they identify</li> </ul> | <ul style="list-style-type: none"> <li>· Serious = if more than 2 questions had "No".</li> <li>· Moderate = if 2 questions had "No".</li> <li>· No or minor = if less than 2 questions had "No".</li> </ul> |

1  
2  
3  
4  
5  
6  
7  
8  
9  
10  
11  
12  
13  
14  
15  
16  
17  
18  
19  
20  
21  
22  
23  
24  
25  
26  
27  
28  
29  
30  
31  
32  
33  
34

access to researcher recruitment (e.g. issues were selected · If the new areas where  
the type of has made and choice around from the researcher research is  
knowledge the of location informed original has necessary  
sought by methods · How the consent or sample to discussed · If the research is  
the study explicit researcher confidentiality demonstrate the researchers have  
· If there · If responded or how they the analysis credibility discussed  
are any methods to events have handled process of their whether or how  
discussions were during the study and the effects of · If sufficient findings the findings can  
around modified study and whether the study on data are · If the be transferred to  
recruitment during the they participants support the findings are populations or  
(e.g. why so, has the considered during and findings discussed considered other  
some researcher the implications study) after the · To what in relation ways the  
people chose not explained of any · If approval contradictory original research may be  
to take how and changes in has been data are taken original used  
part) why the research sought from into account research question  
· If the form of data is clear · Whether the researcher  
· If the researcher own role, critically  
has discussed potential bias examined their  
saturation and influence own role,  
of data during analysis and influence  
and selection during analysis  
of data for and selection  
presentation of data for  
presentation

45  
46

## Appendix 5 Characteristics of the included studies

| Study ID     | Country       | Funding sources      | Primary focus                                                                                                                 | Study design                          | Data collection methods              | Sampling    | Participants, n | Male Sex, % | Chronic pain, % | Chronic cancer pain, % | Prior use of cannabis, % | Risk of Bias/ Methodological Limitations |
|--------------|---------------|----------------------|-------------------------------------------------------------------------------------------------------------------------------|---------------------------------------|--------------------------------------|-------------|-----------------|-------------|-----------------|------------------------|--------------------------|------------------------------------------|
| Bigand 2019  | United States | Non-industry funding | To examine the perceived effects of medical cannabis among patients who are prescribed opioids for persistent pain conditions | Qualitative, Descriptive              | Questionnaire                        | Convenience | 150             | 31.3        | 100             | NR                     | 69.3                     | Serious                                  |
| Boehnke 2019 | United States | NR                   | To assess preferences towards medical cannabis products among medical cannabis users with chronic pain                        | Quantitative, Cross-sectional         | Questionnaire                        | Convenience | 1321            | 40.9        | NR <sup>a</sup> | NR                     | 100                      | Moderate                                 |
| Bruce 2018   | United States | Non-industry funding | To assess approaches to medical cannabis use vis-a-vis prescription medications among patients with chronic conditions        | Qualitative, Descriptive              | Semi-structured telephone interviews | Convenience | 30              | 60.3        | NR <sup>b</sup> | NR                     | 100                      | No or minor                              |
| Cooke 2019   | United States | Non-industry funding | To explore perspectives on the co-use of medical cannabis and opioids among clinicians, and                                   | Qualitative, Modified grounded theory | Semi-structured in-person interviews | Purposive   | 46              | 45.6        | 100             | 0                      | 45.7 <sup>c</sup>        | Moderate                                 |



1  
2  
3  
4  
5 patients with both  
6 chronic non-cancer  
7 pain and a history of  
8 substance use

|                         |                   |                             |                                                                                                                                                                                                                                                   |                                      |                                                   |             |      |      |                 |                  |      |          |
|-------------------------|-------------------|-----------------------------|---------------------------------------------------------------------------------------------------------------------------------------------------------------------------------------------------------------------------------------------------|--------------------------------------|---------------------------------------------------|-------------|------|------|-----------------|------------------|------|----------|
| 9 Degenhard<br>10t 2015 | Australia         | Non-<br>industry<br>funding | To investigate<br>patterns and<br>correlates of medical<br>cannabis use among<br>patients who are<br>prescribed opioids for<br>chronic non-cancer<br>pain                                                                                         | Quantitative,<br>Cross-<br>sectional | Questionn<br>aire, and<br>diagnostic<br>interview | Purposive   | 1514 | 44.4 | 100             | 0                | 43   | Moderate |
| 17 Gallagher<br>182003  | Canada            | NR                          | To survey willingness<br>to try medical<br>cannabis among<br>patients with a known<br>advanced life-limiting<br>illness <sup>d</sup> , and to assess<br>this population's<br>knowledge about<br>medical cannabis                                  | Quantitative,<br>Cross-<br>sectional | Discrete<br>choice,<br>VAS, Likert<br>scales      | Purposive   | 68   | 44.6 | NR <sup>e</sup> | 100 <sup>d</sup> | 35.3 | Critical |
| 27 Gill 2001            | United<br>Kingdom | NR                          | To investigate beliefs<br>about cannabinoids<br>and the associations<br>between those<br>beliefs, beliefs about<br>medication, and<br>personal and pain<br>variables in relation to<br>willingness to try<br>cannabinoids as<br>analgesics, among | Quantitative,<br>Cross-<br>sectional | Questionn<br>aire                                 | Convenience | 65   | 45   | 100             | NR               | NR   | Serious  |

11  
12  
13  
14  
15  
16  
19  
20  
21  
22  
23  
24  
25  
26  
30  
31  
32  
33  
34  
35  
36  
37  
38  
39  
40  
41  
42  
43  
44  
45  
46

1  
2  
3  
4  
5  
6  
7  
8  
9  
10  
11  
12  
13  
14  
15  
16  
17  
18  
19  
20  
21  
22  
23  
24  
25  
26  
27  
28  
29  
30  
31  
32  
33  
34  
35  
36  
37  
38  
39  
40  
41  
42  
43  
44  
45  
46

patients with chronic pain who had interest in trying medical cannabis as an analgesic

To assess beliefs regarding using marijuana for medicine, post injury pain and speaking about marijuana to their health care providers, among patients who have a musculoskeletal injury in the last 1-6 months.

To explore and characterize the experience of using medical cannabis for chronic pain among patients receiving medical cannabis for at least three months

To evaluate the safety and tolerability of three CBMEs among patients with stable chronic pain, and poorly responsive to other modalities

For peer review only

|                  |                |                      |                               |                                      |             |     |      |                 |     |     |             |
|------------------|----------------|----------------------|-------------------------------|--------------------------------------|-------------|-----|------|-----------------|-----|-----|-------------|
| Heng 2018        | United States  | NR                   | Quantitative, Cross-sectional | Questionnaire                        | Convenience | 500 | 50   | NR <sup>f</sup> | NR  | 60  | Moderate    |
| Lavie-Ajayi 2019 | Israel         | Non-industry funding | Qualitative, Phenomenological | Semi-structured in-person interviews | Purposive   | 19  | 52.6 | 100             | 5.3 | 100 | No or minor |
| Notcutt 2004     | United Kingdom | Non-industry funding | Quantitative, RCT             | NR                                   | Convenience | 34  | 32   | 100             | NR  | NR  | Moderate    |

|    |                    |               |                      |                                                                                                                                                                   |                                |                                                      |                          |      |      |                  |      |     |          |
|----|--------------------|---------------|----------------------|-------------------------------------------------------------------------------------------------------------------------------------------------------------------|--------------------------------|------------------------------------------------------|--------------------------|------|------|------------------|------|-----|----------|
| 1  |                    |               |                      |                                                                                                                                                                   |                                |                                                      |                          |      |      |                  |      |     |          |
| 2  |                    |               |                      |                                                                                                                                                                   |                                |                                                      |                          |      |      |                  |      |     |          |
| 3  |                    |               |                      |                                                                                                                                                                   |                                |                                                      |                          |      |      |                  |      |     |          |
| 4  |                    |               |                      |                                                                                                                                                                   |                                |                                                      |                          |      |      |                  |      |     |          |
| 5  | Piper 2017         | United States | Non-industry funding | To survey perspectives of medical cannabis among legal members of medical cannabis dispensaries, and to examine the strengths and limitations of medical cannabis | Mixed Methods, Cross-sectional | Online survey, discrete choice, open-ended questions | Convenience and snowball | 984  | 47.1 | 100 <sup>g</sup> | 16.7 | 100 | Serious  |
| 6  |                    |               |                      |                                                                                                                                                                   |                                |                                                      |                          |      |      |                  |      |     |          |
| 7  |                    |               |                      |                                                                                                                                                                   |                                |                                                      |                          |      |      |                  |      |     |          |
| 8  |                    |               |                      |                                                                                                                                                                   |                                |                                                      |                          |      |      |                  |      |     |          |
| 9  |                    |               |                      |                                                                                                                                                                   |                                |                                                      |                          |      |      |                  |      |     |          |
| 10 |                    |               |                      |                                                                                                                                                                   |                                |                                                      |                          |      |      |                  |      |     |          |
| 11 |                    |               |                      |                                                                                                                                                                   |                                |                                                      |                          |      |      |                  |      |     |          |
| 12 |                    |               |                      |                                                                                                                                                                   |                                |                                                      |                          |      |      |                  |      |     |          |
| 13 |                    |               |                      |                                                                                                                                                                   |                                |                                                      |                          |      |      |                  |      |     |          |
| 14 | Rochford 2019      | Ireland       | NR                   | To evaluate attitudes towards medicinal cannabis among patients who attend chronic pain clinics                                                                   | Quantitative, Cross-sectional  | Questionnaire                                        | Convenience              | 96   | 39.6 | 100              | 22.9 | NR  | Serious  |
| 15 |                    |               |                      |                                                                                                                                                                   |                                |                                                      |                          |      |      |                  |      |     |          |
| 16 |                    |               |                      |                                                                                                                                                                   |                                |                                                      |                          |      |      |                  |      |     |          |
| 17 |                    |               |                      |                                                                                                                                                                   |                                |                                                      |                          |      |      |                  |      |     |          |
| 18 |                    |               |                      |                                                                                                                                                                   |                                |                                                      |                          |      |      |                  |      |     |          |
| 19 |                    |               |                      |                                                                                                                                                                   |                                |                                                      |                          |      |      |                  |      |     |          |
| 20 | Satterlund 2015    | United States | Non-industry funding | To assess perceived risk, concern or overall stigma of marijuana use, and how this stigma may affect the health care among medical marijuana users <sup>c</sup>   | Qualitative, Descriptive       | Semi-structured interviews                           | Convenience and snowball | 18   | 72   | NR <sup>h</sup>  | NR   | 100 | Moderate |
| 21 |                    |               |                      |                                                                                                                                                                   |                                |                                                      |                          |      |      |                  |      |     |          |
| 22 |                    |               |                      |                                                                                                                                                                   |                                |                                                      |                          |      |      |                  |      |     |          |
| 23 |                    |               |                      |                                                                                                                                                                   |                                |                                                      |                          |      |      |                  |      |     |          |
| 24 |                    |               |                      |                                                                                                                                                                   |                                |                                                      |                          |      |      |                  |      |     |          |
| 25 |                    |               |                      |                                                                                                                                                                   |                                |                                                      |                          |      |      |                  |      |     |          |
| 26 |                    |               |                      |                                                                                                                                                                   |                                |                                                      |                          |      |      |                  |      |     |          |
| 27 |                    |               |                      |                                                                                                                                                                   |                                |                                                      |                          |      |      |                  |      |     |          |
| 28 | Sexton 2016        | United States | Non-industry funding | To survey the patterns of use and perceived efficacy of medical cannabis among patients who have used medical cannabis in the last 90 days                        | Quantitative, Cross-sectional  | Questionnaire                                        | Convenience              | 1429 | 54.6 | NR <sup>i</sup>  | NR   | 100 | Moderate |
| 29 |                    |               |                      |                                                                                                                                                                   |                                |                                                      |                          |      |      |                  |      |     |          |
| 30 |                    |               |                      |                                                                                                                                                                   |                                |                                                      |                          |      |      |                  |      |     |          |
| 31 |                    |               |                      |                                                                                                                                                                   |                                |                                                      |                          |      |      |                  |      |     |          |
| 32 |                    |               |                      |                                                                                                                                                                   |                                |                                                      |                          |      |      |                  |      |     |          |
| 33 |                    |               |                      |                                                                                                                                                                   |                                |                                                      |                          |      |      |                  |      |     |          |
| 34 |                    |               |                      |                                                                                                                                                                   |                                |                                                      |                          |      |      |                  |      |     |          |
| 35 |                    |               |                      |                                                                                                                                                                   |                                |                                                      |                          |      |      |                  |      |     |          |
| 36 |                    |               |                      |                                                                                                                                                                   |                                |                                                      |                          |      |      |                  |      |     |          |
| 37 | Zarrabi/Singh 2019 | United States | Non-industry         | To survey perceptions of the benefits and                                                                                                                         | Quantitative, Cross-           | Questionnaire                                        | Convenience              | 101  | 55.7 | 100              | 75.5 | 100 | Serious  |
| 38 |                    |               |                      |                                                                                                                                                                   |                                |                                                      |                          |      |      |                  |      |     |          |
| 39 |                    |               |                      |                                                                                                                                                                   |                                |                                                      |                          |      |      |                  |      |     |          |
| 40 |                    |               |                      |                                                                                                                                                                   |                                |                                                      |                          |      |      |                  |      |     |          |
| 41 |                    |               |                      |                                                                                                                                                                   |                                |                                                      |                          |      |      |                  |      |     |          |
| 42 |                    |               |                      |                                                                                                                                                                   |                                |                                                      |                          |      |      |                  |      |     |          |
| 43 |                    |               |                      |                                                                                                                                                                   |                                |                                                      |                          |      |      |                  |      |     |          |
| 44 |                    |               |                      |                                                                                                                                                                   |                                |                                                      |                          |      |      |                  |      |     |          |
| 45 |                    |               |                      |                                                                                                                                                                   |                                |                                                      |                          |      |      |                  |      |     |          |
| 46 |                    |               |                      |                                                                                                                                                                   |                                |                                                      |                          |      |      |                  |      |     |          |

1  
2  
3  
4 funding harms of medical sectional  
5 cannabis, concerns  
6 about access to  
7 cannabis, and  
8 perceptions of  
9 support from family  
10 and health care  
11 providers, among  
12 patients with serious  
13 illness in APC  
14

---

**Note:**

16 Abbreviation: APC: ambulatory palliative care, CBMEs: cannabis based medicinal extracts, CNCP: chronic non-cancer pain, NR: Not reported, RCT: Randomized  
17 controlled trial, US: United states, VAS: Visual Analogue Scale.  
18

19  
20 a Chronic overlapping pain conditions: back pain 58%, migraine 21%, fibromyalgia 15%, irritable bowel disease or Crohn's disease 14%, temporomandibular joint  
21 disorder 6%.

22 b Rheumatoid arthritis 23.3%, spinal cord disease or injury 20%, Chron's disease 20%, cancer 13.3%, hepatitis C 13.3%, post-traumatic stress disorder (PTSD) 13.3%,  
23 severe fibromyalgia 10%, other (chronic regional pain syndrome, epilepsy, HIV, MS, Parkinson's) 23.3%.

24 c Majority ( $\geq 80\%$ ) were patients with chronic and severe pain.

25 d Advanced life-limiting illnesses include malignancy, advanced cardiac, respiratory, liver or neurological diseases.

26 e The mean score of intensity of pain was 4.9 on a 0 to 10 VAS scale (0= absence of pain, 10=the worst pain intensity imaginable).

27 f Patients had experienced a musculoskeletal injury between 1 to 6 months before entry into the study.

28 g All the participants were legal members of medical cannabis dispensaries in the north-eastern US. Sixty-four percent of patients reported that they had been  
29 diagnosed with chronic pain by a medical professional.

30 h The authors stated "Maladies for which respondents used medical marijuana included migraine headaches, depression, chemotherapy and radiation treatment  
31 effects, chronic pain, and asthma, with the majority citing chronic and severe pain".  
32

33 i Sixty-one percent of patients reported chronic pain, 35.5% had headache/migraine and the remaining 3.5% had other chronic pain conditions.  
34  
35  
36  
37  
38  
39  
40  
41  
42  
43  
44  
45  
46

1  
2  
3  
4  
5  
6  
7  
8  
9  
10  
11  
12  
13  
14  
15  
16  
17  
18  
19  
20  
21  
22  
23  
24  
25  
26  
27  
28  
29  
30  
31  
32  
33  
34  
35  
36  
37  
38  
39  
40  
41  
42  
43  
44  
45  
46

**Appendix 6 Excluded studies and reasons for exclusion in full text screening**

| <b>Study ID</b>        | <b>Reason for exclusion</b> |
|------------------------|-----------------------------|
| 1. Aggarwal 2014       | Not value and preference    |
| 2. Allan 2018          | Not value and preference    |
| 3. Bekker 2018         | Not value and preference    |
| 4. Cairns 2017         | Not value and preference    |
| 5. Caplan B 2018       | Not value and preference    |
| 6. Choo 2016           | Not value and preference    |
| 7. Nickel 2018         | Not value and preference    |
| 8. Djulus 2005         | Not value and preference    |
| 9. Dowden 2019         | Not value and preference    |
| 10. Gieringer 2003     | Not value and preference    |
| 11. Harrison 2013      | Not value and preference    |
| 12. Kepple 2016        | Not value and preference    |
| 13. Kinnucan 2018      | Not value and preference    |
| 14. Bachhuber 2018     | Not value and preference    |
| 15. Zolotov 2016       | Not value and preference    |
| 16. Lum 2019           | Not value and preference    |
| 17. Martins-Welch 2017 | Not value and preference    |
| 18. Naguib 2015        | Not value and preference    |
| 19. Page 2015          | Not value and preference    |
| 20. Parmar 2016        | Not value and preference    |
| 21. Paut Kusturica2019 | Not value and preference    |
| 22. Pearce 2014        | Not value and preference    |
| 23. Pink 2012          | Not value and preference    |
| 24. Piper 2018         | Not value and preference    |
| 25. Reid 2013          | Not value and preference    |
| 26. Reiman 2008        | Not value and preference    |
| 27. Reisfield 2009     | Not value and preference    |
| 28. Reynolds 2017      | Not value and preference    |
| 29. Reynolds 2018      | Not value and preference    |
| 30. Ste-Marie 2015     | Not value and preference    |

|    |                            |                          |
|----|----------------------------|--------------------------|
| 1  |                            |                          |
| 2  |                            |                          |
| 3  |                            |                          |
| 4  |                            |                          |
| 5  | 31. Sutherland 2016        | Not value and preference |
| 6  | 32. Teigen 2019            | Not value and preference |
| 7  | 33. Toth 2015              | Not value and preference |
| 8  | 34. Volkow 2017            | Not value and preference |
| 9  | 35. Wallace 2015           | Not value and preference |
| 10 | 36. Wan 2017               | Not value and preference |
| 11 | 37. Ware 2010              | Not value and preference |
| 12 | 38. Wilsey 2015            | Not value and preference |
| 13 | 39. Winston-McPherson 2019 | Not value and preference |
| 14 | 40. Zaller 2015            | Not value and preference |
| 15 | 41. Ziadni 2018            | Not value and preference |
| 16 | 42. Zvolensky 2011         | Not value and preference |
| 17 | 43. Aggarwal 2018          | Abstract only            |
| 18 | 44. Agornyo 2018           | Abstract only            |
| 19 | 45. Bar-Sela 2014          | Abstract only            |
| 20 | 46. Berg 2017              | Abstract only            |
| 21 | 47. Burks 2016             | Abstract only            |
| 22 | 48. Calvino 2017           | Abstract only            |
| 23 | 49. Cofield 2015           | Abstract only            |
| 24 | 49. Cofield 2015           | Abstract only            |
| 25 | 50. Fitzcharles 2019       | Abstract only            |
| 26 | 51. Galvin 2018            | Abstract only            |
| 27 | 52. Gavigan 2019           | Abstract only            |
| 28 | 53. Grella 2015            | Abstract only            |
| 29 | 54. Gustavsen 2018         | Abstract only            |
| 30 | 55. Kiszko 2017            | Abstract only            |
| 31 | 56. Lee 2012               | Abstract only            |
| 32 | 57. Mitra 2019             | Abstract only            |
| 33 | 58. Muirhead 2015          | Abstract only            |
| 34 | 59. Pires 2018             | Abstract only            |
| 35 | 60. Rhyne 2019             | Abstract only            |
| 36 | 61. Sabet 2014             | Abstract only            |
| 37 | 61. Sabet 2014             | Abstract only            |
| 38 | 62. Schnelle 1999          | Abstract only            |
| 39 |                            |                          |
| 40 |                            |                          |
| 41 |                            |                          |
| 42 |                            |                          |
| 43 |                            |                          |
| 44 |                            |                          |
| 45 |                            |                          |
| 46 |                            |                          |

1  
2  
3  
4  
5  
6  
7  
8  
9  
10  
11  
12  
13  
14  
15  
16  
17  
18  
19  
20  
21  
22  
23  
24  
25  
26  
27  
28  
29  
30  
31  
32  
33  
34  
35  
36  
37  
38  
39  
40  
41  
42  
43  
44  
45  
46

|                          |                                                                      |
|--------------------------|----------------------------------------------------------------------|
| 63. Wurtzen 2018         | Abstract only                                                        |
| 64. Grinberg 2018        | Not patients with chronic pain or their carer                        |
| 65. Iskedjian 2009       | Not patients with chronic pain or their carer                        |
| 66. Grotenhermen 2003    | Not patients with chronic pain or their carer                        |
| 67. LAU 2015             | Not patients with chronic pain or their carer                        |
| 68. Ishida 2019          | Not patients with chronic pain or their carer                        |
| 69. Lucas 2019           | Not patients with chronic pain or their carer                        |
| 70. Wan 2017             | Not patients with chronic pain or their carer                        |
| 71. Mendoza 2016         | Not patients with chronic pain or their carer                        |
| 72. Mendoza 2018         | Not patients with chronic pain or their carer                        |
| 73. Schenker 2019        | Not patients with chronic pain or their carer                        |
| 74. Sharon 2018          | Not patients with chronic pain or their carer                        |
| 75. St-Amant 2015        | Not patients with chronic pain or their carer                        |
| 76. Starrels 2018        | Not patients with chronic pain or their carer                        |
| 77. Starrels 2020        | Not patients with chronic pain or their carer                        |
| 78. Zolotov 2019         | Not patients with chronic pain or their carer                        |
| 79. Zolotov 2019         | Not patients with chronic pain or their carer                        |
| 80. Nouryan 2018         | Not patients with chronic pain or their carer                        |
| 81. Boehnke 2019         | Not patients with chronic pain or their carer                        |
| 82. Khelemsky 2017       | Not patients with chronic pain or their carer                        |
| 83. Vargas-Schaffer 2018 | Not cannabis                                                         |
| 84. Manchikanti 2008     | Not cannabis                                                         |
| 85. Mijatovic 2019       | Not cannabis                                                         |
| 86. Friedberg 2016       | Personal experience                                                  |
| 87. Greenberg 2019       | Personal experience                                                  |
| 88. Burke 2010           | Value and preference data not elicited from patients or their carers |

---

**List of excluded studies at full text screening and reasons for exclusion****1. Not value and preference (n=42)**

1. Aggarwal SK, Pangarkar S, Carter GT, Tribuzio B, Miedema M, Kennedy DJ. Medical marijuana for failed back surgical syndrome: A viable option for pain control or an uncontrolled narcotic? *PM and R*. 2014; 6: 363-72.
2. Allan GM, Ramji J, Perry D, Ton J, Beahm NP, Crisp N, et al. Simplified guideline for prescribing medical cannabinoids in primary care. *Can Fam Physician*. 2018; 64: 111-20.
3. Bekker A. Cannabis use and non-cancer chronic pain. *The Lancet Public Health*. 2018;3:e468.
4. Cairns EA, Kelly MEM. Why support a separate medical access framework for cannabis? *Cmaj*. 2017; 189: E927-E8.
5. Caulley L. Medical marijuana for chronic pain. *New England Journal of Medicine*. 2018; 379: 1575-7.
6. Choo EK, Ewing SWF, Lovejoy TI. Opioids Out, Cannabis in negotiating the unknowns in patient care for chronic pain. *JAMA - Journal of the American Medical Association*. 2016; 316: 1763-4.
7. Curtis Nickel J. Medical marijuana for urologic chronic pelvic pain. *Canadian Urological Association Journal*. 2018; 12: S181-S3.
8. Djulus J, Moretti M, Koren G. Motherisk update: Marijuana use and breastfeeding. *Can Fam Physician*. 2005; 51: 349-50.
9. Dowden A. Barriers to prescribing cannabis-based medicines. *Prescriber*. 2019; 30: 17-21.
10. Gieringer DH. The acceptance of medicinal marijuana in the U.S. *Journal of Cannabis Therapeutics*. 2003; 3: 53-65.
11. Harrison TE, Bruce BK, Weiss KE, Rummans TA, Bostwick JM. Marijuana and chronic nonmalignant pain in adolescents. *Mayo Clinic proceedings*. 2013; 88: 647-50.
12. Kepple NJ, Mulholland E, Freisthler B, Schaper E. Correlates of Amount Spent on Marijuana Buds During a Discrete Purchase at Medical Marijuana Dispensaries: Results from a Pilot Study. *Journal of Psychoactive Drugs*. 2016; 48: 50-5.
13. Kinnucan J. Use of medical cannabis in patients with inflammatory bowel disease. *Gastroenterology and Hepatology*. 2018; 14: 598-601.
14. Bachhuber MA, Arnsten JH, Starrels JL, Cunningham CO. Willingness to Participate in Longitudinal Research Among People with Chronic Pain Who Take Medical Cannabis: A Cross-Sectional Survey. *Cannabis and Cannabinoid Research*. 2018; 3: 45-53.



- 1
- 2
- 3
- 4
- 5 15. Zolotov Y, Baruch Y, Reuveni H, Magnezi R. Adherence to Medical Cannabis among Licensed Patients in Israel. *Cannabis and Cannabinoid Research*. 2016;1:16-21.
- 6
- 7 16. Lum HD. Medical Cannabis in Palliative Care: Meaningful Additions to the Research Evidence. *Journal of Palliative Medicine*. 2019;22:1173-4.
- 8
- 9 17. Martins-Welch D, Nouryan C, Kline M, Modayil S. Health providers' perspectives on medical marijuana use. *Journal of Clinical Oncology*. 2017;35 (31 Supplement 1):235.
- 10
- 11
- 12 18. Naguib M, Foss JF. Medical use of marijuana: Truth in evidence. *Anesthesia and Analgesia*. 2015;121:1124-7.
- 13
- 14 19. Page J, Ware M. Close the knowledge gap. *Nature*. 2015;525:S9.
- 15
- 16 20. Parmar JR, Forrest BD, Freeman RA. Medical marijuana patient counseling points for health care professionals based on trends in the medical uses, efficacy, and adverse effects of cannabis-based pharmaceutical drugs. *Res Social Adm Pharm*. 2016;12:638-54.
- 17
- 18 21. Paut Kusturica M, Tomas A, Sabo A, Tomic Z, Horvat O. Medical cannabis: Knowledge and attitudes of prospective doctors in Serbia. *Saudi Pharmaceutical Journal*. 2019;27:320-5.
- 19
- 20
- 21 22. Pearce DD, Mitsouras K, Irizarry KJ. Discriminating the effects of Cannabis sativa and Cannabis indica: a web survey of medical cannabis users. *J Altern Complement Med*. 2014;20:787-91.
- 22
- 23
- 24 23. Pink LR, Smith AJ, Peng PWH, Galonski MJ, Tumber PS, Evans D, et al. Intake assessment of problematic use of medications in a chronic noncancer pain clinic. *Pain Research and Management*. 2012;17:276-80.
- 25
- 26
- 27 24. Piper BJ. Mother of Berries, ACDC, or Chocolepe: Examination of the Strains Used by Medical Cannabis Patients in New England. *Journal of Psychoactive Drugs*. 2018;50:95-104.
- 28
- 29
- 30 25. Reid A. Medical marihuana: More knowledge and clinical guidance needed. *CJAM Canadian Journal of Addiction Medicine*. 2013;4:21-2.
- 31
- 32 26. Reiman AE. Self-efficacy, social support and service integration at medical cannabis facilities in the San Francisco Bay area of California. *Health Soc Care Community*. 2008;16:31-41.
- 33
- 34 27. Reisfield GM, Wasan AD, Jamison RN. The prevalence and significance of cannabis use in patients prescribed chronic opioid therapy: A review of the extant literature. *Pain Medicine*. 2009;10:1434-41.
- 35
- 36
- 37 28. Reynolds I, Fixen D, Parnes B, Lum H, Church S, Linnebur SA, et al. Attitudes, characteristics, and patterns of Marijuana use in older adults in two outpatient geriatric clinics in Colorado. *Journal of the American Geriatrics Society*. 2017;65 (Supplement 1):S102.
- 38
- 39
- 40
- 41
- 42
- 43
- 44
- 45
- 46

- 1
- 2
- 3
- 4
- 5 29. Reynolds IR, Fixen DR, Parnes BL, Lum HD, Shanbhag P, Church S, et al. Characteristics and Patterns of Marijuana Use in Community-Dwelling Older Adults. *Journal of the American Geriatrics Society*. 2018;66:2167-71.
- 6
- 7 30. Ste-Marie P, Shir Y, Rampakakis E, Sampalis J, Cohen M, Starr M, et al. Profile of rheumatology patients using medical marijuana. *Journal of Rheumatology*. 2015;42 (7):1320.
- 8
- 9
- 10 31. Sutherland AM, Nicholls J, Clarke H. Medical cannabis: The pain physician's perspective. *Journal of Pain Management*. 2016;9:465-72.
- 11
- 12 32. Teigen IA, Serkland TT, Pahr T, Berg JA. Should more patients be offered treatment with cannabinoids? *Tidsskrift for Den Norske Laegeforening*. 2019;139:24.
- 13
- 14 33. Toth A, Possidente C, Sawyer L, DiParlo M, Fanciullo G. An evaluation of new England and national opioid prescribing trends during 2013-2014. *Regional Anesthesia and Pain Medicine Conference: 14th Annual Pain Medicine Meeting of the American Society of Regional Anesthesia and Pain Medicine, ASRA*. 2015;41.
- 15
- 16
- 17 34. Volkow ND, Collins FS. The authors reply. *New England Journal of Medicine*. 2017;377:1798.
- 18
- 19 35. Wallace MS, Ware MA. Medicinal marijuana here to stay and time to take responsibility. *Clinical Journal of Pain*. 2015;31:931-2.
- 20
- 21 36. Wan BA, Blake A, Chan S, Wolt A, Zaki P, Zhang L, et al. Patient characteristics from a medical cannabis provider. *Journal of Pain Management*. 2017;10:337-44.
- 22
- 23
- 24 37. Ware MA, St Arnaud-Trempe E. The abuse potential of the synthetic cannabinoid nabilone. *Addiction*. 2010;105:494-503.
- 25
- 26 38. Wilsey B, Atkinson JH, Marcotte TD, Grant I. The Medicinal Cannabis Treatment Agreement: Providing Information to Chronic Pain Patients Through a Written Document. *Clinical Journal of Pain*. 2015;31:1087-96.
- 27
- 28 39. Winston-McPherson GN, Lo SY, Baird GS, Hoofnagle AN, Greene DN. The Reply. *American Journal of Medicine*. 2019;132:e717.
- 29
- 30 40. Zaller N, Topletz A, Frater S, Yates G, Lally M. Profiles of medicinal cannabis patients attending compassion centers in rhode island. *Journal of Psychoactive Drugs*. 2015;47:18-23.
- 31
- 32
- 33 41. Ziadni M, Anastas T, Darnall B, Wilson A. Characterizing chronic pain in late adolescence and early adulthood: Opioid prescription, marijuana use, and predictors of pain interference. *Pain Medicine (United States)*. 2018;19 (4):856.
- 34
- 35
- 36 42. Zvolensky MJ, Cogle JR, Bonn-Miller MO, Norberg MM, Johnson K, Kosiba J, et al. Chronic pain and marijuana use among a nationally representative sample of adults. *American Journal on Addictions*. 2011;20:538-42.
- 37
- 38
- 39
- 40
- 41
- 42
- 43
- 44
- 45
- 46

**2. Abstract only (n=21)**

1. Aggarwal S, Bhowmick J, Sharma R, Singh M, Gond R K, Dash I, et al. Voice of cancer patients (VoCP): Patient perceptions regarding use of marijuana and its derivatives in cancer. *Journal of Clinical Oncology. Conference.* 2018; 36 (34).
2. Agornyo P, Choi S, Dahmer S, Nouryan CN, Wolf-Klein G, Martins-Welch D. Older adults' use of medical marijuana for chronic pain: A multi-site community-based survey. *Journal of the American Geriatrics Society.* 2018;66 (Supplement 2):S123.
3. Bar-Sela G, Avisar A, Batash R, Schaffer M. Is the clinical use of cannabis by oncology patients advisable? *Current Medicinal Chemistry.* 2014;21:1923-30.
4. Berg AM, Andrus LT, Brace C. Impact of the medical cannabis pilot program in Illinois: A pharmacist perspective. *Consultant Pharmacist.* 2017;32 (10):602.
5. Burks AR, Crossman H, Black S, Limmer JS, Kohn M, Sheeder J. Understanding pregnant women's beliefs and attitudes about marijuana in colorado. *Obstetrics and Gynecology.* 2016;127 (Supplement 1):106S.
6. Calvino B. Advocacy for therapeutic use of cannabis and its derivatives in the treatment of chronic pain. *Douleurs.* 2017;18:59-62.
7. Cofield SS, Salter AR, Tyry T, Crowe C, McNeal S, Cutter GR, et al. Differences in use and perceptions on effectiveness of marijuana for MS: A survey of NARCOMS participants. *Multiple Sclerosis.* 2015;1:333.
8. Fitzcharles MA. Should rheumatologists see patients with fibromyalgia and prescribe marijuana. *International Journal of Rheumatic Diseases.* 2019;22 (Supplement 3):8-9.
9. Galvin D, Mulkerrin O. Cannabis-based medications: A comparison of patients' knowledge and awareness in pain, neurology and prescription out-patient settings. *Pain Practice.* 2018;18 (Supplement 1):60.
10. Gavigan K, Venkatachalam S, Curtis J, Ginsberg S, Benjamin Nowell W. Patients' perception and use of medical marijuana. *Annals of the Rheumatic Diseases.* 2019;78 (Supplement 2):617.
11. Grella CE, Cochran S, Mays V. Does health status influence attitudes about and use of medical marijuana? Findings from a general population survey in California. *Drug and Alcohol Dependence.* 2015;146:e130-e1.
12. Gustavsen S, Sondergaard HB, Andresen SR, Sorensen PS, Sellebjerg FT, Oturai AB. Medical and recreational cannabis use in patients with multiple sclerosis in Denmark. *Multiple Sclerosis Journal.* 2018;24 (2 Supplement):954-5.
13. Kiszko K, Patel K, Chudasama B, Samodulski J, Nienaber C, Martins-Welch D, et al. Older adults' perspectives on medical marijuana (MM) use. *Journal of the American Geriatrics Society.* 2017;65 (Supplement 1):S70.

14. Lee KM, MacDiarmid P, Shalansky S, Wilcox P. The use of self-administered medicinal cannabis for cystic fibrosis symptom management: Patient-reported experiences. *Pediatric Pulmonology*. 2012;35):436.
15. Mitra F, Woolley T. Perceived patient benefits from using prescription opioids and other therapies to manage persistent pain. *Journal of Opioid Management*. 2019;16:5-14.
16. Muirhead C. Marijuana and CF: Controversies associated with patient use. *Pediatric Pulmonology*. 2015;41):152-4.
17. Pires C, Lachiewicz M. A pilot survey of marijuana use and self-reported benefit in women with chronic pelvic pain. *Pain Medicine (United States)*. 2018;19(4):890.
18. Rhyne R, Daitz B, Callan D, Sussman A, McKinney K, Sanchez C, et al. How patients decide what medical cannabis products to use for chronic pain: The patient-dispensary-doctor interface. *Medical Cannabis and Cannabinoids*. 2019;2 (2):75.
19. Sabet KA, Grossman E. Why do people use medical marijuana? The medical conditions of users in seven U.S. states. *Journal of Global Drug Policy and Practice*. 2014;8:1-26.
20. Schnelle M, Grotenhermen F, Reif M, Gorter RW. [Results of a standardized survey on the medical use of cannabis products in the German-speaking area]. *Forschende Komplementarmedizin*. 1999;6 Suppl 3:28-36.
21. Wurtzen H, Franchi F, Hojsted J. Investigating cognitive functioning in patients with chronic non-cancer pain (CNCP) before and during treatment with cannabis based medication - A longitudinal pilot study (N=11). *Scandinavian Journal of Pain*. 2018;18 (Supplement 1):S6.

### 3. Not patients with chronic pain or their carer (n=19)

1. Grinberg K. Factors affecting the population's opinions regarding cannabis treatment for chronic pain patients. *Pain Practice*. 2018;18 (Supplement 1):61.
2. Iskedjian M, Desjardins O, Piwko C, Bereza B, Jaszewski B, Einarson TR. Willingness to pay for a treatment for pain in multiple sclerosis. *Pharmacoeconomics*. 2009;27:149-58.
3. Grotenhermen F, Muller-Vahl K. IACM 2nd Conference on Cannabinoids in Medicine. *Expert Opinion on Pharmacotherapy*. 2003;4:2367-71.
4. Lau N, Sales P, Averill S, Murphy F, Sato SO, Murphy S. A safer alternative: Cannabis substitution as harm reduction. *Drug Alcohol Rev*. 2015;34:654-9.
5. Ishida JH, Wong PO, Cohen BE, Vali M, Steigerwald S, Keyhani S. Substitution of marijuana for opioids in a national survey of US adults. *PLoS one*. 2019;14 (10) (no pagination).

6. Lucas P, Baron EP, Jikomes N. Medical cannabis patterns of use and substitution for opioids & other pharmaceutical drugs, alcohol, tobacco, and illicit substances; Results from a cross-sectional survey of authorized patients. *Harm Reduction Journal*. 2019;16 (1) (no pagination).
7. Wan BA, Diaz P, Blake A, Chan S, Wolt A, Zaki P, et al. Efficacy of different varieties of medical cannabis in relieving symptoms. *Journal of Pain Management*. 2017;10:375-83.
8. Mendoza K, McPherson ML. Are we "In the Weeds"? What hospice providers want to know about medical cannabis. *Postgraduate Medicine*. 2016;128 (Supplement 2):60.
9. Mendoza KS, McPherson ML. Knowledge, Skills, and Attitudes Regarding the Use of Medical Cannabis in the Hospice Population: An Educational Intervention. *Am J Hosp Palliat Care*. 2018;35:759-66.
10. Schenker Y, Merlin JS, Quill T. In reply. *JAMA - Journal of the American Medical Association*. 2019;321:512.
11. Sharon H, Goldway N, Goor-Aryeh I, Eisenberg E, Brill S. Personal experience and attitudes of pain medicine specialists in Israel regarding the medical use of cannabis for chronic pain. *Journal of pain research*. 2018;11:1411-9.
12. St-Amant H, Ware MA, Julien N, Lacasse A. Prevalence and determinants of cannabinoid prescription for the management of chronic noncancer pain: a postal survey of physicians in the Abitibi-Temiscamingue region of Quebec. *CMAJ Open*. 2015;3:E251-7.
13. Starrels JL, Young S, Azari S, Edelman EJ, Pomeranz J, Roy PJ, et al. Experts disagree about marijuana use among patients on opioids for chronic pain. *Journal of General Internal Medicine*. 2018;33 (2 Supplement 1):190.
14. Starrels JL, Young SR, Azari SS, Becker WC, Jennifer Edelman E, Liebschutz JM, et al. Disagreement and Uncertainty Among Experts About how to Respond to Marijuana Use in Patients on Long-term Opioids for Chronic Pain: Results of a Delphi Study. *Pain Medicine*. 2020;21:247-54.
15. Zolotov Y, Sznitman S, Vulfsons S. Validation of Clinical Vignettes to Explore Medical Cannabis Practices. *Isr Med Assoc J*. 2019;21:710-5.
16. Zolotov Y, Vulfsons S, Sznitman S. Predicting Physicians' Intentions to Recommend Medical Cannabis. *J Pain Symptom Manage*. 2019;58:400-7.
17. Nouryan C, Martins-Welch D, Kline M, Modayil S, Dauber M, Akerman M, et al. Health providers' perspectives on medical marijuana use. *Journal of Palliative Medicine*. 2018;21 (5):A27.
18. Boehnke KF, Scott JR, Litinas E, Sisley S, Williams DA, Clauw DJ. Pills to Pot: Observational Analyses of Cannabis Substitution Among Medical Cannabis Users With Chronic Pain. *Journal of Pain*. 2019;20:830-41.

- 1  
2  
3  
4  
5 19. Khelemsky Y, Goldberg AT, Hurd YL, Winkel G, Ninh A, Qian L, et al. Perioperative Patient Beliefs Regarding Potential Effectiveness of Marijuana  
6 (Cannabinoids) for Treatment of Pain: A Prospective Population Survey. *Reg Anesth Pain Med*. 2017;42:652-9.

7  
8 **4. Not cannabis (n=3)**

- 9 1. Vargas-Schaffer G. Drugs able to prevent chronic pain. *Techniques in Regional Anesthesia and Pain Management*. 2014;18:92-9.
- 10 2. Manchikanti L, Atluri S, Trescot AM, Giordano J. Monitoring opioid adherence in chronic pain patients: Tools, techniques, and utility. *Pain Physician*.  
11 2008;11:S155-S80.
- 12 3. Mijatovic D, Lapin B, Davin S, Rispinto S. Psychosocial risk factors for predicting patient dropout of an interdisciplinary pain program: A retrospective analysis.  
13 *Pain Medicine (United States)*\_1. 2019;20 (3):647-8.

14  
15  
16 **5. Personal experience (case study) (n=2)**

- 17 1. Friedberg J. Medical cannabis: Four patient perspectives. *Journal of Pain Management*. 2016;9:517-9.
- 18 2. Greenberg L. "Oh, the Times They Are a Changin'": Reflections on Personal Experiences with Medical Cannabis Therapy. *Cannabis and Cannabinoid Research*.  
19 2019;4:75-6.

20  
21  
22 **6. Value and preference data not elicited from patients or their carers (n=1)**

- 23 1. Burke J. Drug diversion and abuse: Medical marijuana: Miracle or scam? *Pharmacy Times*. 2010;76.
- 24  
25  
26  
27  
28  
29  
30  
31  
32  
33  
34  
35  
36  
37  
38  
39  
40  
41  
42  
43  
44  
45  
46

## Appendix 7 Risk of bias assessments for quantitative studies

| Study ID (Reference number)       | Was the study sample selected in a manner to ensure the representativeness to the target population? | Was the attrition sufficiently low to minimize the risk of bias? | Was the choice of the methodology appropriate for addressing the study aim? | Was the instrument (or tools that was used to elicit values and preferences, e.g. questionnaire) administered in the intended way? | Was a valid representation of the outcome/health state (e.g. a state of pain relief - a beneficial outcome of medical cannabis, or an experience of coughing - a harmful outcome of medical cannabis) utilized? | Did the researchers check the understanding to the measurement techniques (e.g. questionnaire in a survey)? | Were the results analyzed appropriately? | Overall risk of bias |
|-----------------------------------|------------------------------------------------------------------------------------------------------|------------------------------------------------------------------|-----------------------------------------------------------------------------|------------------------------------------------------------------------------------------------------------------------------------|-----------------------------------------------------------------------------------------------------------------------------------------------------------------------------------------------------------------|-------------------------------------------------------------------------------------------------------------|------------------------------------------|----------------------|
| Boehnke 2019 (21)                 | Probably yes                                                                                         | Probably yes                                                     | Probably yes                                                                | Yes                                                                                                                                | NA                                                                                                                                                                                                              | Probably yes                                                                                                | Yes                                      | Moderate             |
| Degenhardt 2015 (24)              | Probably yes                                                                                         | Yes                                                              | Yes                                                                         | Yes                                                                                                                                | NA                                                                                                                                                                                                              | Probably yes                                                                                                | Yes                                      | Moderate             |
| Heng 2018 (27)                    | Probably yes                                                                                         | Yes                                                              | Probably yes                                                                | Yes                                                                                                                                | NA                                                                                                                                                                                                              | Probably yes                                                                                                | Yes                                      | Moderate             |
| Gill 2001 (26)                    | Probably yes                                                                                         | Yes                                                              | Yes                                                                         | Probably yes                                                                                                                       | Probably no                                                                                                                                                                                                     | Probably yes                                                                                                | Probably yes                             | Serious              |
| Gallagher 2003 (25)               | Probably yes                                                                                         | Probably no                                                      | Yes                                                                         | Yes                                                                                                                                | Probably no                                                                                                                                                                                                     | Probably no                                                                                                 | Probably no                              | Critical             |
| Piper BJ 2017 (35)                | Yes                                                                                                  | Probably no                                                      | Yes                                                                         | Yes                                                                                                                                | NA                                                                                                                                                                                                              | Yes                                                                                                         | yes                                      | Serious              |
| Sexton 2016 (30)                  | Yes                                                                                                  | Probably yes                                                     | Yes                                                                         | Yes                                                                                                                                | NA                                                                                                                                                                                                              | Yes                                                                                                         | Yes                                      | Moderate             |
| Zarrabi 2020, Singh 2019 (31, 34) | Probably yes                                                                                         | Probably yes                                                     | Yes                                                                         | Yes                                                                                                                                | Probably no                                                                                                                                                                                                     | Probably no                                                                                                 | Yes                                      | Serious              |
| Notcutt 2004 (33)                 | Probably yes                                                                                         | Probably Yes                                                     | Probably yes                                                                | Probably yes                                                                                                                       | NA                                                                                                                                                                                                              | Probably yes                                                                                                | Probably yes                             | Moderate             |
| Rochford 2019 (29)                | Probably no                                                                                          | Probably yes                                                     | Probably yes                                                                | Probably yes                                                                                                                       | NA                                                                                                                                                                                                              | Probably yes                                                                                                | Probably yes                             | Serious              |

**Appendix 8 Methodological limitations assessments for qualitative studies**

| Study ID (Reference number) | Was there a clear statement of the aims of the research? | Is a qualitative methodology appropriate? | Was the research design appropriate to address the aims of the research? | Was the recruitment strategy appropriate to the aims of the research? | Was the data collected in a way that addressed the research issue? | Has the relationship between researcher and participants been adequately considered? | Have ethical issues been taken into consideration? | Was the data analysis sufficiently rigorous? | Is there a clear statement of findings? | How valuable is the research? | Overall methodological limitations |
|-----------------------------|----------------------------------------------------------|-------------------------------------------|--------------------------------------------------------------------------|-----------------------------------------------------------------------|--------------------------------------------------------------------|--------------------------------------------------------------------------------------|----------------------------------------------------|----------------------------------------------|-----------------------------------------|-------------------------------|------------------------------------|
| Bruce 2018 (22)             | Yes                                                      | Yes                                       | Yes                                                                      | Can't tell                                                            | Yes                                                                | No                                                                                   | Yes                                                | Yes                                          | Yes                                     | Yes                           | No or minor                        |
| Cooke 2019 (23)             | Yes                                                      | Yes                                       | Yes                                                                      | Can't tell                                                            | Yes                                                                | No                                                                                   | Can't tell                                         | Yes                                          | No                                      | Yes                           | Moderate                           |
| Bigand 2019 (20)            | Yes                                                      | Yes                                       | No                                                                       | Can't tell                                                            | No                                                                 | No                                                                                   | Yes                                                | Yes                                          | Yes                                     | Yes                           | Serious                            |
| Lavie-Ajayi 2019 (28)       | Yes                                                      | Yes                                       | Yes                                                                      | Yes                                                                   | Yes                                                                | No                                                                                   | Can't tell                                         | Yes                                          | Yes                                     | Yes                           | No or minor                        |
| Satterlund 2015 (32)        | Yes                                                      | Yes                                       | Yes                                                                      | Can't tell                                                            | Yes                                                                | No                                                                                   | Yes                                                | Yes                                          | Yes                                     | Yes                           | Moderate                           |



## Appendix 9 Evidence profile for review findings

| Review finding                                                                                                  | Explanation                                                                                                                                                                                                                                                                                                                                                                                                                                                                                                                                                                          | Certainty assessment with GRADE/ GRADE CERQual |                               |                                          |                          |                         |                       |                           | Certainty |
|-----------------------------------------------------------------------------------------------------------------|--------------------------------------------------------------------------------------------------------------------------------------------------------------------------------------------------------------------------------------------------------------------------------------------------------------------------------------------------------------------------------------------------------------------------------------------------------------------------------------------------------------------------------------------------------------------------------------|------------------------------------------------|-------------------------------|------------------------------------------|--------------------------|-------------------------|-----------------------|---------------------------|-----------|
|                                                                                                                 |                                                                                                                                                                                                                                                                                                                                                                                                                                                                                                                                                                                      | Study design (Reference number)                | NO. of studies (participants) | Risk of bias/ Methodological limitations | Inconsistency/ Coherence | Indirectness/ Relevance | Imprecision/ Adequacy | Small effect bias         |           |
| <b>1. Values and preferences towards medical cannabis</b>                                                       |                                                                                                                                                                                                                                                                                                                                                                                                                                                                                                                                                                                      |                                                |                               |                                          |                          |                         |                       |                           |           |
| <b>1.1 Use of medical cannabis for chronic pain</b>                                                             |                                                                                                                                                                                                                                                                                                                                                                                                                                                                                                                                                                                      |                                                |                               |                                          |                          |                         |                       |                           |           |
| Patients had mixed levels of comfort or willingness to use medical cannabis.                                    | [Quantitative] Most patients with advanced life-limiting illnesses were comfortable using cannabis for chronic pain and nausea (25), while other non-palliative patients with chronic pain were unwilling or ambivalent about medical cannabis use (26). Non-White patients with advanced illness were more concerned about medical cannabis compared to White patients, but they remained comfortable using medical cannabis (25). Chronic pain patients who use both medical cannabis and other prescription medications believed that medical cannabis was effective for managing | Quantitative (25,26,27)                        | 3 (633)                       | Serious risk                             | Not serious              | Serious                 | Not serious           | Not serious               | Low       |
| Patients with a range of chronic medical conditions believed that medical cannabis was effective for pain (22). | [Qualitative] Patients with a range of chronic medical conditions believed that medical cannabis was effective for managing                                                                                                                                                                                                                                                                                                                                                                                                                                                          | Qualitative (22)                               | 1 (30)                        | No or very minor concerns                | NA                       | Minor concerns          | Serious concerns      | No or very minor concerns | Low       |

1  
2  
3  
4  
5  
6  
7  
8  
9  
10  
11  
12  
13  
14  
15  
16  
17  
18  
19  
20  
21  
22  
23  
24  
25  
26  
27  
28  
29  
30  
31  
32  
33  
34  
35  
36  
37  
38  
39  
40  
41  
42  
43  
44  
45  
46

|                                                                                                              |                                                                                                                                                                                                                                                                                                                                                                                                                |                               |         |                           |             |                           |                  |                           |          |
|--------------------------------------------------------------------------------------------------------------|----------------------------------------------------------------------------------------------------------------------------------------------------------------------------------------------------------------------------------------------------------------------------------------------------------------------------------------------------------------------------------------------------------------|-------------------------------|---------|---------------------------|-------------|---------------------------|------------------|---------------------------|----------|
| Most patients who use medical cannabis had a positive attitude toward its use for pain relief.               | [Quantitative]<br>Those using medical cannabis during their recovery believed that it reduced pain (25). Most individuals expressed positive aspects of medical cannabis use, such as pain reduction (27, 31, 34). The majority of participants with cancer in one study reported using cannabis products for a “cancer cure” (31). Some believed that cannabis should be legalized for medical purposes (29). | Quantitative (25,27,29,31,34) | 4 (765) | Serious risk              | Not serious | Serious                   | Not serious      | Not serious               | Low      |
|                                                                                                              | [Qualitative]<br>Most individuals expressed use of medical cannabis for chronic pain was associated with a range of improved outcomes (e.g. better function, sleep, life changing etc.) (28).                                                                                                                                                                                                                  | Qualitative (28)              | 1 (19)  | No or very minor concerns | NA          | No or very minor concerns | Serious concerns | No or very minor concerns | Moderate |
| <b>1.2 Medical cannabis over other pain medicines</b>                                                        |                                                                                                                                                                                                                                                                                                                                                                                                                |                               |         |                           |             |                           |                  |                           |          |
| Patients with chronic pain and substance use histories preferred medical cannabis over prescription opioids. | [Qualitative]<br>Patients with chronic pain and substance use histories preferred medical cannabis over prescription opioids to manage pain (23).                                                                                                                                                                                                                                                              | Qualitative (23)              | 1 (46)  | No or very minor concerns | NA          | Minor concerns            | Serious concerns | No or very minor concerns | Low      |

1  
2  
3  
4

|    |               |                                                   |                   |        |              |             |         |         |             |          |
|----|---------------|---------------------------------------------------|-------------------|--------|--------------|-------------|---------|---------|-------------|----------|
| 5  | Some patients | [Quantitative]                                    | Quantitative (25) | 1 (68) | Very serious | Not serious | Serious | Serious | Not serious | Very low |
| 6  | believed that | Some participants believed that because           |                   |        |              |             |         |         |             |          |
| 7  | medical       | cannabis is a 'natural' product, it is safer than |                   |        |              |             |         |         |             |          |
| 8  | cannabis is   | morphine and other strong pain killers (25).      |                   |        |              |             |         |         |             |          |
| 9  | safer than    | Non-Christians were more likely to believe        |                   |        |              |             |         |         |             |          |
| 10 | morphine and  | that cannabis is safer than morphine (25).        |                   |        |              |             |         |         |             |          |
| 11 | other strong  | Those with high school education or less,         |                   |        |              |             |         |         |             |          |
| 12 | pain killers. | were significantly less likely to believe that    |                   |        |              |             |         |         |             |          |
| 13 |               | cannabis was safer than morphine (25).            |                   |        |              |             |         |         |             |          |
| 14 |               |                                                   |                   |        |              |             |         |         |             |          |
| 15 |               |                                                   |                   |        |              |             |         |         |             |          |

### 16 1.3 Different preparations of medical cannabis

#### 18 *Cannabis variety (i.e. sativa, indica, hybrid)*

17

|    |               |                                               |                   |          |              |             |             |             |             |          |
|----|---------------|-----------------------------------------------|-------------------|----------|--------------|-------------|-------------|-------------|-------------|----------|
| 20 | Most patients | [Quantitative]                                | Quantitative (21) | 1 (1321) | Serious risk | Not serious | Not serious | Not serious | Not serious | Moderate |
| 21 | preferred     | Most patients preferred using a blend of      |                   |          |              |             |             |             |             |          |
| 22 | medical       | indica and sativa to manage chronic pain,     |                   |          |              |             |             |             |             |          |
| 23 | cannabis with | followed by indica alone and sativa alone.    |                   |          |              |             |             |             |             |          |
| 24 | a blend of    | There were no differences in cannabis variety |                   |          |              |             |             |             |             |          |
| 25 | indica and    | preferences between males and females,        |                   |          |              |             |             |             |             |          |
| 26 | sativa,       | those who use cannabis for medical purposes   |                   |          |              |             |             |             |             |          |
| 27 | regardless of | only and those who use for medical and        |                   |          |              |             |             |             |             |          |
| 28 | gender,       | recreational purposes, or novice and          |                   |          |              |             |             |             |             |          |
| 29 | reasons for   | experienced users.(21)                        |                   |          |              |             |             |             |             |          |
| 30 | use, and      |                                               |                   |          |              |             |             |             |             |          |
| 31 | cannabis      |                                               |                   |          |              |             |             |             |             |          |
| 32 |               |                                               |                   |          |              |             |             |             |             |          |
| 33 |               |                                               |                   |          |              |             |             |             |             |          |

#### 34 *Cannabis content (i.e. THC or CBD potency, ratio of THC and CBD)*

35

36

37

38

39

40

41

42

43

44

45

46

1  
2  
3  
4  
5  
6  
7  
8  
9  
10  
11  
12  
13  
14  
15  
16  
17  
18  
19  
20  
21  
22  
23  
24  
25  
26  
27  
28  
29  
30  
31  
32  
33  
34  
35  
36  
37  
38  
39  
40  
41  
42  
43  
44  
45  
46

|                                                                                                                                                                         |                                                                                                                                                                                                                                                                                                                                                                                                                                                                                                                                                                                                  |                       |          |              |             |             |             |             |          |
|-------------------------------------------------------------------------------------------------------------------------------------------------------------------------|--------------------------------------------------------------------------------------------------------------------------------------------------------------------------------------------------------------------------------------------------------------------------------------------------------------------------------------------------------------------------------------------------------------------------------------------------------------------------------------------------------------------------------------------------------------------------------------------------|-----------------------|----------|--------------|-------------|-------------|-------------|-------------|----------|
| High THC and high CBD is the most preferred preparation , but gender, reason for use, and cannabis experience level influenced patients' preference for cannabis ratio. | [Quantitative] Females preferred low THC: high CBD, while males preferred equal ratios of THC: CBD. (21) Patients who use cannabis for medical purposes reported a greater preference for products with low THC: high CBD compared to individuals who use cannabis both medically and recreationally. (21) Both novice and experienced cannabis users preferred high CBD products most, and more novice users prefer low THC: high CBD while experienced users preferred high THC: high CBD.(21) Almost none preferred high THC and low CBD, low THC and low CBD, only CBD, or only THC.(21, 33) | Quantitative (21, 33) | 2 (1355) | Serious risk | Not serious | Not serious | Not serious | Not serious | Moderate |
|-------------------------------------------------------------------------------------------------------------------------------------------------------------------------|--------------------------------------------------------------------------------------------------------------------------------------------------------------------------------------------------------------------------------------------------------------------------------------------------------------------------------------------------------------------------------------------------------------------------------------------------------------------------------------------------------------------------------------------------------------------------------------------------|-----------------------|----------|--------------|-------------|-------------|-------------|-------------|----------|

**Cannabis administration route**

|    |                |                                                |                    |          |              |             |         |         |          |
|----|----------------|------------------------------------------------|--------------------|----------|--------------|-------------|---------|---------|----------|
| 1  |                |                                                |                    |          |              |             |         |         |          |
| 2  |                |                                                |                    |          |              |             |         |         |          |
| 3  |                |                                                |                    |          |              |             |         |         |          |
| 4  |                |                                                |                    |          |              |             |         |         |          |
| 5  | Gender,        | [Quantitative]                                 | Quantitative (21), | 2 (2305) | Serious risk | Not serious | Not     | Not     | Not      |
| 6  | reason for use | Females patients preferred to use tincture     | Mixed (35)         |          |              | serious     | serious | serious | Moderate |
| 7  | and cannabis   | and topical preparations and less preferred to |                    |          |              |             |         |         |          |
| 8  | experience     | use vaporizing and smoking preparations        |                    |          |              |             |         |         |          |
| 9  | level          | compared with males. (21)                      |                    |          |              |             |         |         |          |
| 10 | influenced     |                                                |                    |          |              |             |         |         |          |
| 11 | patients'      | Patients who used cannabis both                |                    |          |              |             |         |         |          |
| 12 | preferred      | recreationally and medically preferred         |                    |          |              |             |         |         |          |
| 13 | cannabis       | smoking and vaporizing, while those who        |                    |          |              |             |         |         |          |
| 14 | administratio  | used cannabis medically only preferred         |                    |          |              |             |         |         |          |
| 15 | n routes.      | smoking, vaporizing, tinctures, and edibles.   |                    |          |              |             |         |         |          |
| 16 |                | (21)                                           |                    |          |              |             |         |         |          |
| 17 |                |                                                |                    |          |              |             |         |         |          |
| 18 |                | Experienced cannabis users preferred           |                    |          |              |             |         |         |          |
| 19 |                | multiple administration routes compared with   |                    |          |              |             |         |         |          |
| 20 |                | novice users. Smoking, vaporizing, and edibles |                    |          |              |             |         |         |          |
| 21 |                | were the most common preferred                 |                    |          |              |             |         |         |          |
| 22 |                | administration routes among both experience    |                    |          |              |             |         |         |          |
| 23 |                | and novice users. (21)                         |                    |          |              |             |         |         |          |
| 24 |                |                                                |                    |          |              |             |         |         |          |
| 25 |                |                                                |                    |          |              |             |         |         |          |
| 26 |                | [Mixed]                                        |                    |          |              |             |         |         |          |
| 27 |                | Among chronic pain patients who are legal      |                    |          |              |             |         |         |          |
| 28 |                | members of medical cannabis dispensaries, a    |                    |          |              |             |         |         |          |
| 29 |                | minority of participants preferred using a     |                    |          |              |             |         |         |          |
| 30 |                | joint, pipe, or bong, while some preferred     |                    |          |              |             |         |         |          |
| 31 |                | vaporizers, edibles, or tinctures; very few    |                    |          |              |             |         |         |          |
| 32 |                | preferred concentrates or topicals. In         |                    |          |              |             |         |         |          |
| 33 |                | addition, very few participants reported       |                    |          |              |             |         |         |          |
| 34 |                | unpleasant routes of administration as what    |                    |          |              |             |         |         |          |
| 35 |                | they liked least about medical cannabis. (25)  |                    |          |              |             |         |         |          |
| 36 |                |                                                |                    |          |              |             |         |         |          |
| 37 |                |                                                |                    |          |              |             |         |         |          |
| 38 |                |                                                |                    |          |              |             |         |         |          |
| 39 |                |                                                |                    |          |              |             |         |         |          |
| 40 |                |                                                |                    |          |              |             |         |         |          |
| 41 |                |                                                |                    |          |              |             |         |         |          |
| 42 |                |                                                |                    |          |              |             |         |         |          |
| 43 |                |                                                |                    |          |              |             |         |         |          |
| 44 |                |                                                |                    |          |              |             |         |         |          |
| 45 |                |                                                |                    |          |              |             |         |         |          |
| 46 |                |                                                |                    |          |              |             |         |         |          |

For peer review only

1  
2  
3  
4  
5  
6  
7  
8  
9  
10  
11  
12  
13  
14  
15  
16  
17  
18  
19  
20  
21  
22  
23  
24  
25  
26  
27  
28  
29  
30  
31  
32  
33  
34  
35  
36  
37  
38  
39  
40  
41  
42  
43  
44  
45  
46

|                                                                                                      |                                                                                                                                                                                                                        |                   |        |              |             |             |         |             |     |
|------------------------------------------------------------------------------------------------------|------------------------------------------------------------------------------------------------------------------------------------------------------------------------------------------------------------------------|-------------------|--------|--------------|-------------|-------------|---------|-------------|-----|
| Most patients who have an advanced life-limiting illness preferred an oral form of medical cannabis. | [Quantitative]<br>Most patients who have an advanced life-limiting illness stated preference for an oral form (pill, droplets under the tongue, or droplets added to food) and only a minority preferred smoking. (25) | Quantitative (25) | 1 (68) | Very serious | Not serious | Not serious | Serious | Not serious | Low |
|------------------------------------------------------------------------------------------------------|------------------------------------------------------------------------------------------------------------------------------------------------------------------------------------------------------------------------|-------------------|--------|--------------|-------------|-------------|---------|-------------|-----|

**152. Factors that influenced patient’s decision regarding use of medical cannabis**

**162.1 Factors influenced the choice of medical cannabis use**

|                                                                                                                                                      |                                                                                                                                                                                                                                                                                                                                                                                                                                           |            |        |              |             |             |             |             |          |
|------------------------------------------------------------------------------------------------------------------------------------------------------|-------------------------------------------------------------------------------------------------------------------------------------------------------------------------------------------------------------------------------------------------------------------------------------------------------------------------------------------------------------------------------------------------------------------------------------------|------------|--------|--------------|-------------|-------------|-------------|-------------|----------|
| Most patients used medical cannabis because it improved the management of symptoms associated with pain, mental health and other medical conditions. | [Mixed]<br>Some patients who were legal members of medical cannabis dispensaries preferred aspects of medical cannabis related to health and well-being, including pain relief, sleep benefits, limited addiction potential, improved quality of life, functionality, and relaxation, while others preferred general aspects of medical cannabis, like general improvement in the quality of life, functionality, cognitive aspects (35). | Mixed (35) | 1(984) | Serious risk | Not serious | Not serious | Not serious | Not serious | Moderate |
|------------------------------------------------------------------------------------------------------------------------------------------------------|-------------------------------------------------------------------------------------------------------------------------------------------------------------------------------------------------------------------------------------------------------------------------------------------------------------------------------------------------------------------------------------------------------------------------------------------|------------|--------|--------------|-------------|-------------|-------------|-------------|----------|

1  
2  
3  
4  
5  
6  
7  
8  
9  
10  
11  
12  
13  
14  
15  
16  
17  
18  
19  
20  
21  
22  
23  
24  
25  
26  
27  
28  
29  
30  
31  
32  
33  
34  
35  
36  
37  
38  
39  
40  
41  
42  
43  
44  
45  
46

[Qualitative]

Patients viewed medical cannabis as an effective approach to managing symptoms with or without other medications (20, 22, 23), including pain (20, 22, 23), disrupted sleep, poor appetite, and nausea (20). Patients reported that cannabis improved emotional and mental well-being by reducing anxiety, depression and stress (20). Patients also reported that cannabis allowed them to sleep, focus and function (28). Most patients reported that cannabis facilitated a state of relaxation in which pain could be dealt with in a more tolerable form (28).

However, patients found that medical cannabis use sometimes made it difficult to manage their medication regimen (23).

|                              |         |                |                           |                           |                           |                           |      |
|------------------------------|---------|----------------|---------------------------|---------------------------|---------------------------|---------------------------|------|
| Qualitative (20, 22, 23, 28) | 4 (245) | Minor concerns | No or very minor concerns | High |
|------------------------------|---------|----------------|---------------------------|---------------------------|---------------------------|---------------------------|------|

1  
2  
3  
4  
5  
6  
7  
8  
9  
10  
11  
12  
13  
14  
15  
16  
17  
18  
19  
20  
21  
22  
23  
24  
25  
26  
27  
28  
29  
30  
31  
32  
33  
34  
35  
36  
37  
38  
39  
40  
41  
42  
43  
44  
45  
46

|                                                                                                |                                                                                                                                                                                                                                                                              |                   |         |              |             |             |             |             |          |
|------------------------------------------------------------------------------------------------|------------------------------------------------------------------------------------------------------------------------------------------------------------------------------------------------------------------------------------------------------------------------------|-------------------|---------|--------------|-------------|-------------|-------------|-------------|----------|
| Most patients were motivated to use medical cannabis to reduce other prescription medications. | [Quantitative]<br>Chronic pain patients who used both medical cannabis and prescription medications believed that medical cannabis was effective for pain relief and were motivated to use medical cannabis to decrease the amount of prescribed medications they used (27). | Quantitative (27) | 1 (500) | Serious risk | Not serious | Not serious | Not serious | Not serious | Moderate |
|------------------------------------------------------------------------------------------------|------------------------------------------------------------------------------------------------------------------------------------------------------------------------------------------------------------------------------------------------------------------------------|-------------------|---------|--------------|-------------|-------------|-------------|-------------|----------|

For peer review only



1  
2  
3  
4  
5  
6  
7  
8  
9  
10  
11  
12  
13  
14  
15  
16  
17  
18  
19  
20  
21  
22  
23  
24  
25  
26  
27  
28  
29  
30  
31  
32  
33  
34  
35  
36  
37  
38  
39  
40  
41  
42  
43  
44  
45  
46

[Qualitative]

Patients with a range of chronic medical conditions (22) believed that medical cannabis managed pain symptoms and were motivated to use medical cannabis to decrease the amount of prescribed medications they used (22).

Qualitative (22)

1 (30)

No or very minor concerns

NA

No or very minor concerns

Moderate concerns

No or very minor concerns

Moderate

For peer review only

1  
2  
3  
4  
5  
6  
7  
8  
9  
10  
11  
12  
13  
14  
15  
16  
17  
18  
19  
20  
21  
22  
23  
24  
25  
26  
27  
28  
29  
30  
31  
32  
33  
34  
35  
36  
37  
38  
39  
40  
41  
42  
43  
44  
45  
46

|                                                                                                                                                            |                                                                                                                                                                                                                                                                                                                                                  |                            |          |              |             |             |             |             |          |
|------------------------------------------------------------------------------------------------------------------------------------------------------------|--------------------------------------------------------------------------------------------------------------------------------------------------------------------------------------------------------------------------------------------------------------------------------------------------------------------------------------------------|----------------------------|----------|--------------|-------------|-------------|-------------|-------------|----------|
| The majority of patients expressed that their cannabis use was influenced by positive social consequences, such as social support from friends and family. | [Quantitative]<br>A majority of patients agreed that cannabis for medical use would not cause disagreements or relationship problems with their loved ones (25). Most participants reported that their family members were supportive of their use, and the majority reported that their medical providers were supportive of their use (31,34). | Quantitative<br>(25,31,34) | 2 (2104) | Serious risk | Not serious | Not serious | Not serious | Not serious | Moderate |
|------------------------------------------------------------------------------------------------------------------------------------------------------------|--------------------------------------------------------------------------------------------------------------------------------------------------------------------------------------------------------------------------------------------------------------------------------------------------------------------------------------------------|----------------------------|----------|--------------|-------------|-------------|-------------|-------------|----------|

For peer review only

1  
2  
3  
4  
5  
6  
7  
8  
9  
10  
11  
12  
13  
14  
15  
16  
17  
18  
19  
20  
21  
22  
23  
24  
25  
26  
27  
28  
29  
30  
31  
32  
33  
34  
35  
36  
37  
38  
39  
40  
41  
42  
43  
44  
45  
46

[Quantitative]  
 Concerns about medical cannabis included concerns about side effects, addiction, tolerance, losing control or acting strangely, and were related to unwillingness to use cannabis (27). Patients who used cannabis to manage their pain had greater feelings of anxiety, and increased catastrophic thinking (26). Among those who were unwilling to use cannabis, increased age was related to more concerns about medical cannabis, including concerns of losing control (26). Increased age also impacted beliefs that cannabis was a useful medication to treat pain (27). Some patients reported that they were concerned about unpleasant physical or emotional symptoms suggestive of withdrawal after stopping medical cannabis use (31 , 34). Some patients were concerned about mental or physical dependence to medical cannabis; however, most did not perceive themselves as addicted to medical cannabis (31 , 34). Concerns about addiction were associated with unwillingness to use medical cannabis (26).  
 [Mixed]  
 Some patients who were legal members of medical cannabis dispensaries reported adverse physical, cognitive, and emotional effects of medical cannabis, as well as people’s negative and stigmatizing values towards medical cannabis (35).

|                                           |         |              |             |             |             |             |          |
|-------------------------------------------|---------|--------------|-------------|-------------|-------------|-------------|----------|
| Quantitative (26, 27, 31, 34), Mixed (35) | 4(1650) | Serious risk | Not serious | Not serious | Not serious | Not serious | Moderate |
|-------------------------------------------|---------|--------------|-------------|-------------|-------------|-------------|----------|

|    |                                              |                  |         |          |            |            |          |          |          |
|----|----------------------------------------------|------------------|---------|----------|------------|------------|----------|----------|----------|
| 1  |                                              |                  |         |          |            |            |          |          |          |
| 2  |                                              |                  |         |          |            |            |          |          |          |
| 3  |                                              |                  |         |          |            |            |          |          |          |
| 4  |                                              |                  |         |          |            |            |          |          |          |
| 5  | [Qualitative]                                | Qualitative (20, | 2 (196) | Moderate | No or very | No or very | Minor    | No or    | Moderate |
| 6  | Patients commonly reported lack of           | 23)              |         | concerns | minor      | minor      | concerns | very     |          |
| 7  | concentration, poor memory and sleepiness    |                  |         |          | concerns   | concerns   |          | minor    |          |
| 8  | as consequences of medical cannabis use.     |                  |         |          |            |            |          | concerns |          |
| 9  | Participants also reported minor consequence |                  |         |          |            |            |          |          |          |
| 10 | which included eating too much, coughing,    |                  |         |          |            |            |          |          |          |
| 11 | and weight gain. Seizures and anaphylaxis    |                  |         |          |            |            |          |          |          |
| 12 | from an allergic reaction were described as  |                  |         |          |            |            |          |          |          |
| 13 | severe consequences from use (20).           |                  |         |          |            |            |          |          |          |
| 14 |                                              |                  |         |          |            |            |          |          |          |
| 15 | Some patients were concerned that, while     |                  |         |          |            |            |          |          |          |
| 16 | medical cannabis helped with pain            |                  |         |          |            |            |          |          |          |
| 17 | management, it might lead addiction (23).    |                  |         |          |            |            |          |          |          |
| 18 | Patients with a history of addiction were    |                  |         |          |            |            |          |          |          |
| 19 | concerned that medical cannabis use could    |                  |         |          |            |            |          |          |          |
| 20 | pose a threat to their sobriety (23).        |                  |         |          |            |            |          |          |          |
| 21 |                                              |                  |         |          |            |            |          |          |          |
| 22 |                                              |                  |         |          |            |            |          |          |          |
| 23 |                                              |                  |         |          |            |            |          |          |          |
| 24 |                                              |                  |         |          |            |            |          |          |          |
| 25 |                                              |                  |         |          |            |            |          |          |          |
| 26 |                                              |                  |         |          |            |            |          |          |          |
| 27 |                                              |                  |         |          |            |            |          |          |          |
| 28 |                                              |                  |         |          |            |            |          |          |          |
| 29 |                                              |                  |         |          |            |            |          |          |          |
| 30 |                                              |                  |         |          |            |            |          |          |          |
| 31 |                                              |                  |         |          |            |            |          |          |          |
| 32 |                                              |                  |         |          |            |            |          |          |          |
| 33 |                                              |                  |         |          |            |            |          |          |          |
| 34 |                                              |                  |         |          |            |            |          |          |          |
| 35 |                                              |                  |         |          |            |            |          |          |          |
| 36 |                                              |                  |         |          |            |            |          |          |          |
| 37 |                                              |                  |         |          |            |            |          |          |          |
| 38 |                                              |                  |         |          |            |            |          |          |          |
| 39 |                                              |                  |         |          |            |            |          |          |          |
| 40 |                                              |                  |         |          |            |            |          |          |          |
| 41 |                                              |                  |         |          |            |            |          |          |          |
| 42 |                                              |                  |         |          |            |            |          |          |          |
| 43 |                                              |                  |         |          |            |            |          |          |          |
| 44 |                                              |                  |         |          |            |            |          |          |          |
| 45 |                                              |                  |         |          |            |            |          |          |          |
| 46 |                                              |                  |         |          |            |            |          |          |          |

1  
2  
3  
4  
5  
6  
7  
8  
9  
10  
11  
12  
13  
14  
15  
16  
17  
18  
19  
20  
21  
22  
23  
24  
25  
26  
27  
28  
29  
30  
31  
32  
33  
34  
35  
36  
37  
38  
39  
40  
41  
42  
43  
44  
45  
46

|                                                                                                                 |                                                                                                                                                                                                                                                                                                                                                                                                                                                                                                                                                                                                                |                                            |          |              |             |             |             |             |          |
|-----------------------------------------------------------------------------------------------------------------|----------------------------------------------------------------------------------------------------------------------------------------------------------------------------------------------------------------------------------------------------------------------------------------------------------------------------------------------------------------------------------------------------------------------------------------------------------------------------------------------------------------------------------------------------------------------------------------------------------------|--------------------------------------------|----------|--------------|-------------|-------------|-------------|-------------|----------|
| Most patients expressed that their cannabis use was influenced by negative social consequences, such as stigma. | [Quantitative]<br>Patients who were comfortable with their cannabis use for pain had a significant concern over the use of cannabis leading to relationship problems or disagreements with loved ones (25). Some patients agreed that medical cannabis would make them vulnerable to attack and theft by substance abusers. A minority of patients agreed that medical cannabis would cause problems with the law, and that they may be arrested or charged with possession of cannabis (25). Some patients expressed concerns about others' opinions towards their used of cannabis-related products (31,34). | Quantitative (25,26,31, 34),<br>Mixed (35) | 4 (3153) | Serious risk | Not serious | Not serious | Not serious | Not serious | Moderate |
|-----------------------------------------------------------------------------------------------------------------|----------------------------------------------------------------------------------------------------------------------------------------------------------------------------------------------------------------------------------------------------------------------------------------------------------------------------------------------------------------------------------------------------------------------------------------------------------------------------------------------------------------------------------------------------------------------------------------------------------------|--------------------------------------------|----------|--------------|-------------|-------------|-------------|-------------|----------|

1  
2  
3  
4  
5  
6  
7  
8  
9  
10  
11  
12  
13  
14  
15  
16  
17  
18  
19  
20  
21  
22  
23  
24  
25  
26  
27  
28  
29  
30  
31  
32  
33  
34  
35  
36  
37  
38  
39  
40  
41  
42  
43  
44  
45  
46

|                                                                                                                                                                                                                                                                                                                                                                                                                                                                                                                                                                                                                                                          |                                         |                 |                          |                                  |                                  |                       |                                  |                 |
|----------------------------------------------------------------------------------------------------------------------------------------------------------------------------------------------------------------------------------------------------------------------------------------------------------------------------------------------------------------------------------------------------------------------------------------------------------------------------------------------------------------------------------------------------------------------------------------------------------------------------------------------------------|-----------------------------------------|-----------------|--------------------------|----------------------------------|----------------------------------|-----------------------|----------------------------------|-----------------|
| <p>[Qualitative]<br/>Commonly reported negative social consequences included judgment from others as a result of use and "stoner" or "pothead" stereotypes (20, 32). Some patients reported that stigma affected the way they asked healthcare providers about cannabis as a treatment option, the ability to seek out medical cannabis as a treatment option, the location at which they purchased cannabis, and their ability to use cannabis in public. Patients who reported these factors tended to take longer to seek out cannabis as a treatment option, conceal their use, and would not speak to healthcare providers about cannabis (32).</p> | <p>Qualitative (20, 32)</p>             | <p>2 (168)</p>  | <p>Moderate concerns</p> | <p>No or very minor concerns</p> | <p>No or very minor concerns</p> | <p>Minor concerns</p> | <p>No or very minor concerns</p> | <p>Moderate</p> |
| <p>The cost, legal status, and accessibility of medical cannabis influenced patients' decisions to use medical cannabis.<br/>[Quantitative]<br/>Some patients were concerned about the cost of medical cannabis and some were concerned about the legal status and accessibility of medical cannabis (31). Some patients reported that they would use medical cannabis if they had access to it (24). When making decisions about medical cannabis, the majority of patients relied on information from doctors, followed by the internet and friends or family (31, 34).</p>                                                                            | <p>Quantitative (24,31), Mixed (35)</p> | <p>3 (2599)</p> | <p>Serious risk</p>      | <p>Not serious</p>               | <p>Not serious</p>               | <p>Not serious</p>    | <p>Not serious</p>               | <p>Moderate</p> |
| <p>[Mixed]<br/>Some patients who were legal members of medical cannabis dispensaries were</p>                                                                                                                                                                                                                                                                                                                                                                                                                                                                                                                                                            |                                         |                 |                          |                                  |                                  |                       |                                  |                 |

1  
2  
3  
4  
5  
6  
7  
8  
9  
10  
11  
12  
13  
14  
15  
16  
17  
18  
19  
20  
21  
22  
23  
24  
25  
26  
27  
28  
29  
30  
31  
32  
33  
34  
35  
36  
37  
38  
39  
40  
41  
42  
43  
44  
45  
46

[Qualitative]

Some patients felt that the cost of medical cannabis was too high, potentially limiting their access (20), while some reported that the legalization of medical cannabis improved access and influenced their decisions to purchase medical cannabis for symptom relief (20). Other patients found changes in policies related to medical cannabis difficult to navigate and wanted assistance to access medical cannabis (23).

Qualitative (20, 23)

2 (196)

Moderate concerns

No or very minor concerns

No or very minor concerns

Minor concerns

No or very minor concerns

Moderate

**2.2 Factors influencing the choice of different preparations of medical cannabis**

1  
2  
3  
4  
5  
6  
7  
8  
9  
10  
11  
12  
13  
14  
15  
16  
17  
18  
19  
20  
21  
22  
23  
24  
25  
26  
27  
28  
29  
30  
31  
32  
33  
34  
35  
36  
37  
38  
39  
40  
41  
42  
43  
44  
45  
46

|                                                                                                                                                                                                              |                                                                                                                                                                                                                                                                                                                                                                                                                                                                                                                                                                                                                                                                                                                                                                                                                                                                                                                                                                                                 |                       |          |              |             |         |             |             |     |
|--------------------------------------------------------------------------------------------------------------------------------------------------------------------------------------------------------------|-------------------------------------------------------------------------------------------------------------------------------------------------------------------------------------------------------------------------------------------------------------------------------------------------------------------------------------------------------------------------------------------------------------------------------------------------------------------------------------------------------------------------------------------------------------------------------------------------------------------------------------------------------------------------------------------------------------------------------------------------------------------------------------------------------------------------------------------------------------------------------------------------------------------------------------------------------------------------------------------------|-----------------------|----------|--------------|-------------|---------|-------------|-------------|-----|
| Patients chose medical cannabis products mainly based on cannabinoid content, recommendations from dispensary employees, described effects and side effects, cannabis variety, smell, and flower appearance. | [Quantitative ]<br>Most patients selected medical cannabis products based on cannabinoid content (e.g. THC), recommendations from dispensary employees, described effects, and cannabis variety (i.e. indica vs. sativa). A minority of patients selected cannabis based on visual properties and smell, and some patients were guided by recommendations from a friend, or name of the product. Recommendations from a medical professional was the least common factor that patients would consider when selecting medical cannabis (21).<br><br>When selecting medical cannabis products, patients consider the following factors: the most commonly factors were smell, delta 9-tetrahydrocannabinol (THC) content, hybrid indica/sativa species, indica species, how the flower looks (size, density of the flower, and/or trichome and shape, cannabidiol (CBD) content, and sativa species. Some patients reported varietal name as important factor for medical cannabis selection.(30) | Quantitative (21, 30) | 2 (2750) | Serious risk | Not serious | Serious | Not serious | Not serious | Low |
|--------------------------------------------------------------------------------------------------------------------------------------------------------------------------------------------------------------|-------------------------------------------------------------------------------------------------------------------------------------------------------------------------------------------------------------------------------------------------------------------------------------------------------------------------------------------------------------------------------------------------------------------------------------------------------------------------------------------------------------------------------------------------------------------------------------------------------------------------------------------------------------------------------------------------------------------------------------------------------------------------------------------------------------------------------------------------------------------------------------------------------------------------------------------------------------------------------------------------|-----------------------|----------|--------------|-------------|---------|-------------|-------------|-----|



1  
2  
3  
4  
5  
6  
7  
8  
9  
10  
11  
12  
13  
14  
15  
16  
17  
18  
19  
20  
21  
22  
23  
24  
25  
26  
27  
28  
29  
30  
31  
32  
33  
34  
35  
36  
37  
38  
39  
40  
41  
42  
43  
44  
45  
46

|                                                                                                                                                                                                                                                                                                                                                                                                                                                                                                    |                         |        |                           |                   |                           |                  |                           |     |
|----------------------------------------------------------------------------------------------------------------------------------------------------------------------------------------------------------------------------------------------------------------------------------------------------------------------------------------------------------------------------------------------------------------------------------------------------------------------------------------------------|-------------------------|--------|---------------------------|-------------------|---------------------------|------------------|---------------------------|-----|
| [Qualitative]                                                                                                                                                                                                                                                                                                                                                                                                                                                                                      | Qualitative (22, 23,28) | 3 (95) | No or very minor concerns | Moderate concerns | No or very minor concerns | Serious concerns | No or very minor concerns | Low |
| <p>One study reported that long lasting effect of medical cannabis positively influenced patients choice of medical cannabis product (22). Another two studies reported that patients’ uncertain about how they could determine which species of cannabis might work best to manage their pain and side effects of medical cannabis (e.g. headaches, disorientation or the sensation of feeling “stoned,” coughing) negatively influence patients choice of medical cannabis product (23, 28).</p> |                         |        |                           |                   |                           |                  |                           |     |

For peer review only

1  
2  
3  
4  
5  
6  
7  
8  
9  
10  
11  
12  
13  
14  
15  
16  
17  
18  
19  
20  
21  
22  
23  
24  
25  
26  
27  
28  
29  
30  
31  
32  
33  
34  
35  
36  
37  
38  
39  
40  
41  
42  
43  
44  
45  
46

|                                                                                                                                                                                                                                                                                                                                                                                                                                                                                                                                                                                                                                                                                                                                                                                                                                                                                                                                                                                                                                                                                                                                                                                                                                                                                                                                                                |                                                                                                                                                                                                                            |                          |                 |                     |                    |                    |                    |                    |                 |
|----------------------------------------------------------------------------------------------------------------------------------------------------------------------------------------------------------------------------------------------------------------------------------------------------------------------------------------------------------------------------------------------------------------------------------------------------------------------------------------------------------------------------------------------------------------------------------------------------------------------------------------------------------------------------------------------------------------------------------------------------------------------------------------------------------------------------------------------------------------------------------------------------------------------------------------------------------------------------------------------------------------------------------------------------------------------------------------------------------------------------------------------------------------------------------------------------------------------------------------------------------------------------------------------------------------------------------------------------------------|----------------------------------------------------------------------------------------------------------------------------------------------------------------------------------------------------------------------------|--------------------------|-----------------|---------------------|--------------------|--------------------|--------------------|--------------------|-----------------|
| <p>Gender, reason for use, and level of use experience influenced the factors patients considered when selecting cannabis products.</p> <p>A higher proportion of males selected cannabis products based on cannabinoid content (i.e. THC or CBD potency, ratio of THC and CBD), cannabis variety (i.e. indica or sativa), visual properties, and smell. A higher proportion of females consulted with a medical professional when choosing cannabis products. (21)</p> <p>Patients who use cannabis both medically and recreationally were more likely to select cannabis products based on THC or other cannabinoid content, cannabis variety, described effects, visual properties, smell, recommendation from friends, and the product name, while those who use cannabis medically were more likely use recommendations from dispensary employees or a medical professional. (21)</p> <p>Novice users were more likely to select a cannabis product based on dispensary recommendation consult with a medical professional than experienced users, while experienced users chose products based on nearly all other selection factors including smell, visual properties, described effects, cannabinoid content (i.e. THC or CBD potency, ratio of THC and CBD), cannabis variety (i.e. indica or sativa) and name of medical cannabis product (21).</p> | <p>[Quantitative]</p> <p>Selection of cannabis product were influenced by gender, reason for use (e.g., medical only vs. medical and recreational), and cannabis experience level (e.g., novice vs. experienced). (21)</p> | <p>Quantitative (21)</p> | <p>1 (1321)</p> | <p>Serious risk</p> | <p>Not serious</p> | <p>Not serious</p> | <p>Not serious</p> | <p>Not serious</p> | <p>Moderate</p> |
|----------------------------------------------------------------------------------------------------------------------------------------------------------------------------------------------------------------------------------------------------------------------------------------------------------------------------------------------------------------------------------------------------------------------------------------------------------------------------------------------------------------------------------------------------------------------------------------------------------------------------------------------------------------------------------------------------------------------------------------------------------------------------------------------------------------------------------------------------------------------------------------------------------------------------------------------------------------------------------------------------------------------------------------------------------------------------------------------------------------------------------------------------------------------------------------------------------------------------------------------------------------------------------------------------------------------------------------------------------------|----------------------------------------------------------------------------------------------------------------------------------------------------------------------------------------------------------------------------|--------------------------|-----------------|---------------------|--------------------|--------------------|--------------------|--------------------|-----------------|

1  
2  
3  
4  
5  
6  
7  
8  
9  
10  
11  
12  
13  
14  
15  
16  
17  
18  
19  
20  
21  
22  
23  
24  
25  
26  
27  
28  
29  
30  
31  
32  
33  
34  
35  
36  
37  
38  
39  
40  
41  
42  
43  
44  
45  
46

Abbreviations: CBD = cannabidiol; THC = delta-9-tetrahydrocannabinol.

For peer review only

## MOOSE Checklist for Meta-analyses of Observational Studies

| Item No                                     | Recommendation                                                                                                                                                                                                                                                               | Reported on Page No                        |
|---------------------------------------------|------------------------------------------------------------------------------------------------------------------------------------------------------------------------------------------------------------------------------------------------------------------------------|--------------------------------------------|
| Reporting of background should include      |                                                                                                                                                                                                                                                                              |                                            |
| 1                                           | Problem definition                                                                                                                                                                                                                                                           | 5                                          |
| 2                                           | Hypothesis statement                                                                                                                                                                                                                                                         | 5,6                                        |
| 3                                           | Description of study outcome(s)                                                                                                                                                                                                                                              | 6                                          |
| 4                                           | Type of exposure or intervention used                                                                                                                                                                                                                                        | 6                                          |
| 5                                           | Type of study designs used                                                                                                                                                                                                                                                   | 6                                          |
| 6                                           | Study population                                                                                                                                                                                                                                                             | 6                                          |
| Reporting of search strategy should include |                                                                                                                                                                                                                                                                              |                                            |
| 7                                           | Qualifications of searchers (eg, librarians and investigators)                                                                                                                                                                                                               | 7,8                                        |
| 8                                           | Search strategy, including time period included in the synthesis and key words                                                                                                                                                                                               | 7 & Appendix 1                             |
| 9                                           | Effort to include all available studies, including contact with authors                                                                                                                                                                                                      | 7                                          |
| 10                                          | Databases and registries searched                                                                                                                                                                                                                                            | 7                                          |
| 11                                          | Search software used, name and version, including special features used (eg, explosion)                                                                                                                                                                                      | 7,8                                        |
| 12                                          | Use of hand searching (eg, reference lists of obtained articles)                                                                                                                                                                                                             | 7                                          |
| 13                                          | List of citations located and those excluded, including justification                                                                                                                                                                                                        | 11 & Appendix 6                            |
| 14                                          | Method of addressing articles published in languages other than English                                                                                                                                                                                                      | 8                                          |
| 15                                          | Method of handling abstracts and unpublished studies                                                                                                                                                                                                                         | 8                                          |
| 16                                          | Description of any contact with authors                                                                                                                                                                                                                                      | n/a                                        |
| Reporting of methods should include         |                                                                                                                                                                                                                                                                              |                                            |
| 17                                          | Description of relevance or appropriateness of studies assembled for assessing the hypothesis to be tested                                                                                                                                                                   | 7,8                                        |
| 18                                          | Rationale for the selection and coding of data (eg, sound clinical principles or convenience)                                                                                                                                                                                | 9                                          |
| 19                                          | Documentation of how data were classified and coded (eg, multiple raters, blinding and interrater reliability)                                                                                                                                                               | 9                                          |
| 20                                          | Assessment of confounding (eg, comparability of cases and controls in studies where appropriate)                                                                                                                                                                             | n/a                                        |
| 21                                          | Assessment of study quality, including blinding of quality assessors, stratification or regression on possible predictors of study results                                                                                                                                   | 8,9                                        |
| 22                                          | Assessment of heterogeneity                                                                                                                                                                                                                                                  | 9,10                                       |
| 23                                          | Description of statistical methods (eg, complete description of fixed or random effects models, justification of whether the chosen models account for predictors of study results, dose-response models, or cumulative meta-analysis) in sufficient detail to be replicated | 9                                          |
| 24                                          | Provision of appropriate tables and graphics                                                                                                                                                                                                                                 | Figure 1, Tables 1 & 2, Supplementary File |
| Reporting of results should include         |                                                                                                                                                                                                                                                                              |                                            |
| 25                                          | Graphic summarizing individual study estimates and overall estimate                                                                                                                                                                                                          | n/a                                        |
| 26                                          | Table giving descriptive information for each study included                                                                                                                                                                                                                 | Table 1                                    |
| 27                                          | Results of sensitivity testing (eg, subgroup analysis)                                                                                                                                                                                                                       | n/a                                        |

|    |                                                   |         |
|----|---------------------------------------------------|---------|
| 28 | Indication of statistical uncertainty of findings | Table 2 |
|----|---------------------------------------------------|---------|

| Item No                                 | Recommendation                                                                                                            | Reported on Page No |
|-----------------------------------------|---------------------------------------------------------------------------------------------------------------------------|---------------------|
| Reporting of discussion should include  |                                                                                                                           |                     |
| 29                                      | Quantitative assessment of bias (eg, publication bias)                                                                    | n/a                 |
| 30                                      | Justification for exclusion (eg, exclusion of non-English language citations)                                             | 18                  |
| 31                                      | Assessment of quality of included studies                                                                                 | 16                  |
| Reporting of conclusions should include |                                                                                                                           |                     |
| 32                                      | Consideration of alternative explanations for observed results                                                            | 17,18               |
| 33                                      | Generalization of the conclusions (ie, appropriate for the data presented and within the domain of the literature review) | 18                  |
| 34                                      | Guidelines for future research                                                                                            | 18                  |
| 35                                      | Disclosure of funding source                                                                                              | 20                  |

From: Stroup DF, Berlin JA, Morton SC, et al, for the Meta-analysis Of Observational Studies in Epidemiology (MOOSE) Group. Meta-analysis of Observational Studies in Epidemiology. A Proposal for Reporting. *JAMA*. 2000;283(15):2008-2012. doi: 10.1001/jama.283.15.2008.
