# Supplementary material for: Values and preferences towards medical cannabis among people living with chronic pain: a mixed-methods systematic review
Source: PubMed Central journal article supplement — BMJ Open. 2021 Sep 7;11(9):e050831. doi: 10.1136/bmjopen-2021-050831 (PMC8451285; doi:10.1136/bmjopen-2021-050831), 2021-09-07
Supplement: bmjopen-2021-050831supp001.pdf [file bmjopen-2021-050831supp001.pdf]

**Appendix 1 Search strategies and results in MEDLINE, Embase and PsycInfo**

March 17, 2020

MEDLINE

Database: OVID Medline Epub Ahead of Print, In-Process &amp; Other Non-Indexed Citations, Ovid MEDLINE(R) Daily and Ovid MEDLINE(R) 1946 to Present

Search Strategy:

- 
- 1 Cannabis/ (8934)
  - 2 exp cannabinoids/ or cannabidiol/ or cannabitol/ or dronabinol/ (13763)
  - 3 Endocannabinoids/ (5620)
  - 4 exp Receptors, Cannabinoid/ (9222)
  - 5 (Cannabis or cannabitol or cannabinoid\* or cannabidiol or bhang or cannador or charas or ganja or ganjah or hashish or hemp or marihuana or marijuana or nabilone or cesamet or cesametic or ajulemic acid or cannabichromene or cannabielsoin or cannabigerol or tetrahydrocannabinol or dronabinol or levonantradol or nabiximols or palmidrol or tetrahydrocannabinolic acid or tetrahydro cannabitol or marinol or tetranabinex or sativex or endocannabinoid\*).mp. (54746)
  - 6 or/1-5 (54746)
  - 7 "marijuana use"/ or marijuana smoking/ (5304)
  - 8 Marijuana Abuse/ (6168)
  - 9 (epidiolex or gwp 42003p or gwp42003p or nabidiolex or dronabinol or thc or tetrahydrocannabinol\* or ea 1477 or ea1477 or marinol or qcd 84924 or syndros or tetrabinex or tetranabinex or cesamet or nabilone or deltanyne or "abbott 40566" or namisol or dronabinolum or "QCD 84924" or "CCRIS 4726" or nabiximol? or "gw 1000" or gw1000 or "sab 378" or sab378 or sativex).mp. [mp=title, abstract, original title, name of substance word, subject heading word, floating sub-heading word, keyword heading word, organism supplementary concept word, protocol supplementary concept word, rare disease supplementary concept word, unique identifier, synonyms] (11622)
  - 10 or/7-9 (20972)
  - 11 or/1-10 (55952)
  - 12 \*Attitude to Health/ (42364)
  - 13 \*Patient Participation/ (14355)
  - 14 \*Patient Preference/ (5009)
  - 15 preference\*.ti,ab. (148469)
  - 16 choice.ti. (31408)
  - 17 choices.ti. (6250)
  - 18 value.ti. (124160)
  - 19 health state values.ti,ab. (175)
  - 20 valuation\*.ti. (1523)

- 21 expectation\*.ti,ab. (85695)
- 22 attitude\*.ti,ab. (144860)
- 23 acceptab\*.ti,ab. (174183)
- 24 knowledge.ti,ab. (676935)
- 25 point of view.ti,ab. (41412)
- 26 user participation.ti,ab. (243)
- 27 users participation.ti,ab. (49)
- 28 patient participation.ti,ab. (2134)
- 29 patients participation.ti,ab. (589)
- 30 patient perspective\*.ti,ab. (3526)
- 31 patients perspective\*.ti,ab. (5820)
- 32 user perspective\*.ti,ab. (466)
- 33 users perspective\*.ti,ab. (513)
- 34 patient perce\*.ti,ab. (5165)
- 35 patients perce\*.ti,ab. (9776)
- 36 health perception\*.ti,ab. (2652)
- 37 user perce\*.ti,ab. (351)
- 38 users perce\*.ti,ab. (786)
- 39 user view\*.ti,ab. (110)
- 40 users view\*.ti,ab. (369)
- 41 patient view\*.ti,ab. (546)
- 42 patients view\*.ti,ab. (2807)
- 43 ((decision\* and mak\*).ti. or (decision mak\* or decisions mak\*).ti,ab.) and (patient\* or user\* or men or women).ti,ab. (73905)
- 44 discrete choice\*.ti,ab. (1942)
- 45 decision board\*.ti,ab. (45)
- 46 decision analy\*.ti,ab. (7477)
- 47 decision-support.ti,ab. (13930)
- 48 decision tool\*.ti,ab. (808)
- 49 decision aid\*.ti,ab. (2976)
- 50 discrete-choice\*.ti,ab. (1942)
- 51 \*Decision Making/ and (patient\* or user\* or men or women).ti. (5869)
- 52 decision support techniques/ (19921)

- 53 (health and utilit\*).ti. (1434)
- 54 gamble\*.ti,ab. (4395)
- 55 prospect theory.ti,ab. (285)
- 56 preference score.ti,ab. (163)
- 57 preference elicitation.ti,ab. (179)
- 58 health utilit\*.ti,ab. (2017)
- 59 utility value\*.ti,ab. (1487)
- 60 utility score\*.ti,ab. (1378)
- 61 Utility estimate\*.ti,ab. (269)
- 62 health state.ti,ab. (4119)
- 63 feeling thermometer\*.ti,ab. (68)
- 64 best-worst scaling.ti,ab. (202)
- 65 standard gamble.ti,ab. (832)
- 66 time trade-off.ti,ab. (1150)
- 67 TTO.ti,ab. (1026)
- 68 probability trade-off.ti,ab. (20)
- 69 utility score.ti,ab. (507)
- 70 preference based.ti,ab. (1291)
- 71 preference score\*.ti,ab. (495)
- 72 multiattribute.ti,ab. (337)
- 73 multi attribute.ti,ab. (523)
- 74 EuroQol 5D.ti,ab. (1268)
- 75 EuroQol5D.ti,ab. (19)
- 76 EQ5D.ti,ab. (550)
- 77 EQ 5D.ti,ab. (7695)
- 78 SF6D.ti,ab. (32)
- 79 SF 6D.ti,ab. (753)
- 80 HUI.ti,ab. (1169)
- 81 15D.ti,ab. (1704)
- 82 or/12-81 (1494263)
- 83 (patient adj3 (value\* or preference\*)).ti,ab. (16093)
- 84 (patient\* adj5 (report\* or relate\*) adj5 (outcome\* or measure\* or assess\*)).mp. (41519)

- 85 patient participation/ or doctor patient relation/ or nurse patient relationship/ or patient attitude/ or patient preference/ or patient satisfaction/ or patient compliance/ or medication compliance/ or patient decision making/ or patient education/ or chronic patient/ or attitude to health/ or \*"quality of life"/ or self care/ or self concept/ or self examination/ or adaptive behavior/ or coping behavior/ or coping.ab,ti. or needs assessment/ or personal autonomy/ or patient advocacy/ or life event/ (688791)
- 86 (patient\* adj3 (prefer\* or participat\* or involve\* or perspective\* or view\* or activat\* or empower\* or collaborate)).mp. [mp=title, abstract, original title, name of substance word, subject heading word, floating sub-heading word, keyword heading word, organism supplementary concept word, protocol supplementary concept word, rare disease supplementary concept word, unique identifier, synonyms] (154936)
- 87 (patient\* adj2 (attitude\* or decision\* or needs\*)).mp. [mp=title, abstract, original title, name of substance word, subject heading word, floating sub-heading word, keyword heading word, organism supplementary concept word, protocol supplementary concept word, rare disease supplementary concept word, unique identifier, synonyms] (32381)
- 88 expert patient\*.mp. (261)
- 89 (patient\* and (centre\* or center\* or focus\*)).mp. [mp=title, abstract, original title, name of substance word, subject heading word, floating sub-heading word, keyword heading word, organism supplementary concept word, protocol supplementary concept word, rare disease supplementary concept word, unique identifier, synonyms] (726322)
- 90 patient\*.mp. and (decision making/ or medical decision making/ or cooperation/ or distress syndrome/ or emotional stress/) [mp=title, abstract, original title, name of substance word, subject heading word, floating sub-heading word, keyword heading word, organism supplementary concept word, protocol supplementary concept word, rare disease supplementary concept word, unique identifier, synonyms] (44808)
- 91 or/83-90 (1481530)
- 92 82 or 91 (2686916)
- 93 11 and 92 (6739)
- 94 (chronic adj4 pain\*).mp. (68992)
- 95 Chronic Pain/ (13719)
- 96 exp Osteoarthritis/ (61921)
- 97 osteoarthrit\*.mp. (88211)
- 98 osteo-arthrit\*.mp. [mp=title, abstract, original title, name of substance word, subject heading word, floating sub-heading word, keyword heading word, organism supplementary concept word, protocol supplementary concept word, rare disease supplementary concept word, unique identifier, synonyms] (474)
- 99 exp Arthritis, Rheumatoid/ (111604)
- 100 exp Neuralgia/ (20041)
- 101 Diabetic Neuropathies/ (14472)
- 102 (neuropath\* adj5 pain\*).mp. [mp=title, abstract, original title, name of substance word, subject heading word, floating sub-heading word, keyword heading word, organism supplementary concept word, protocol supplementary concept word, rare disease supplementary concept word, unique identifier, synonyms] (24189)

- 103 neuralg\*.mp. (26998)
- 104 zoster.mp. (20810)
- 105 Irritable Bowel Syndrome/ (7099)
- 106 IBS.mp. (8807)
- 107 Migraine Disorders/ (24884)
- 108 migraine\*.mp. (38930)
- 109 Fibromyalgia/ (8287)
- 110 Fibromyalg\*.mp. (11565)
- 111 complex regional pain syndromes/ or causalgia/ or reflex sympathetic dystrophy/ (5486)
- 112 Pain, Intractable/ (6166)
- 113 Phantom Limb/ (1855)
- 114 Hyperalgesia/ (11498)
- 115 exp back pain/ or failed back surgery syndrome/ or low back pain/ (38351)
- 116 radiculopath\*.mp. (9283)
- 117 Musculoskeletal Pain/ (3090)
- 118 Headache/ (27380)
- 119 exp Headache Disorders/ (33884)
- 120 headache\*.mp. (92254)
- 121 exp Temporomandibular Joint Disorders/ (17098)
- 122 whiplash.mp. (3942)
- 123 Whiplash Injuries/ (3216)
- 124 exp Cumulative Trauma Disorders/ (13612)
- 125 exp Peripheral Nervous System Diseases/dt, rh, th [Drug Therapy, Rehabilitation, Therapy] (29519)
- 126 Pain Measurement/de [Drug Effects] (6646)
- 127 (backache\* or backpain\* or dorsalg\* or arthralgi\* or polyarthralgi\* or arthrodyni\* or myalgi\* or fibromyalgi\* or myodyn\* or neuralgi\* or ischialgi\* or crps or rachialgi\*).ti,ab. (44403)
- 128 ((noncancer\* or non-cancer\* or back or discogen\* or chronic\* or recurrent or persist\* or bone or musculoskelet\* or muscle\* or skelet\* or spinal or spine or vertebra\* or joint\* or arthritis or Intestin\* or neuropath\* or neck or cervical\* or head or facial\* or complex or radicular or cervicobrachi\* or orofacial or somatic or non-malign\* or shoulder\* or knee\* or hip or hips) adj3 pain).mp. [mp=title, abstract, original title, name of substance word, subject heading word, floating sub-heading word, keyword heading word, organism supplementary concept word, protocol supplementary concept word, rare disease supplementary concept word, unique identifier, synonyms] (215471)
- 129 or/94-128 (633956)

Annotation: chronic pain and painful conditions

130 93 and 129 (343)

Embase

Database: Embase <1974 to 2020 March 16>

Search Strategy:

- 
- 1 cannabis/ (33753)
  - 2 exp cannabinoid/ (65425)
  - 3 medical cannabis/ (2094)
  - 4 exp cannabinoid receptor/ (14516)
  - 5 exp endocannabinoid/ (8544)
  - 6 (Cannabis or cannabinol or cannabinoid\* or cannabidiol or bhang or cannador or charas or ganja or ganjah or hashish or hemp or marihuana or marijuana or nabilone or cesamet or cesametic or ajulemic acid or cannabichromene or cannabielsoin or cannabigerol or tetrahydrocannabinol or dronabinol or levonantradol or nabiximols or palmidrol or tetrahydrocannabinolic acid or tetrahydro cannabinol or marinol or tetranabinex or sativex or endocannabinoid\*).mp. [mp=title, abstract, heading word, drug trade name, original title, device manufacturer, drug manufacturer, device trade name, keyword, floating subheading word, candidate term word] (86218)
  - 7 cannabis addiction/ (9661)
  - 8 "cannabis use"/ or cannabis smoking/ (11097)
  - 9 (epidiolex or gwp 42003p or gwp42003p or nabidiolex or dronabinol or thc or tetrahydrocannabinol\* or ea 1477 or ea1477 or marinol or qcd 84924 or syndros or tetrabinex or tetranabinex or cesamet or nabilone or deltanyne or "abbott 40566" or namisol or dronabinolum or "QCD 84924" or "CCRIS 4726" or nabiximol? or "gw 1000" or gw1000 or "sab 378" or sab378 or sativex).mp. [mp=title, abstract, heading word, drug trade name, original title, device manufacturer, drug manufacturer, device trade name, keyword, floating subheading word, candidate term word] (19601)
  - 10 or/1-9 (89571)
  - 11 \*attitude to health/ (55489)
  - 12 \*patient participation/ (9554)
  - 13 \*patient preference/ (4523)
  - 14 preference\*.ti,ab. (180987)
  - 15 choice.ti. (36120)
  - 16 choices.ti. (7375)
  - 17 value.ti. (137715)
  - 18 health state values.ti,ab. (233)

- 19 valuation\*.ti. (2249)
- 20 expectation\*.ti,ab. (106912)
- 21 attitude\*.ti,ab. (179875)
- 22 acceptab\*.ti,ab. (240808)
- 23 knowledge.ti,ab. (851427)
- 24 point of view.ti,ab. (57170)
- 25 user participation.ti,ab. (284)
- 26 users participation.ti,ab. (52)
- 27 patient participation.ti,ab. (2881)
- 28 patients participation.ti,ab. (830)
- 29 patient perspective\*.ti,ab. (5558)
- 30 patients perspective\*.ti,ab. (8635)
- 31 user perspective\*.ti,ab. (564)
- 32 users perspective\*.ti,ab. (624)
- 33 patient perce\*.ti,ab. (8096)
- 34 patients perce\*.ti,ab. (14350)
- 35 health perception\*.ti,ab. (3709)
- 36 user perce\*.ti,ab. (400)
- 37 users perce\*.ti,ab. (902)
- 38 user view\*.ti,ab. (169)
- 39 users view\*.ti,ab. (469)
- 40 patient view\*.ti,ab. (865)
- 41 patients view\*.ti,ab. (3932)
- 42 ((decision\* and mak\*).ti. or (decision mak\* or decisions mak\*).ti,ab.) and (patient\* or user\* or men or women).ti,ab. (111434)
- 43 discrete choice\*.ti,ab. (2789)
- 44 decision board\*.ti,ab. (59)
- 45 decision analy\*.ti,ab. (10602)
- 46 decision-support.ti,ab. (18317)
- 47 decision tool\*.ti,ab. (1271)
- 48 decision aid\*.ti,ab. (4097)
- 49 discrete-choice\*.ti,ab. (2789)
- 50 \*Decision Making/ and (patient\* or user\* or men or women).ti. (5671)

- 51 (health and utilit\*).ti. (2083)
- 52 gamble\*.ti,ab. (5213)
- 53 prospect theory.ti,ab. (286)
- 54 preference score.ti,ab. (241)
- 55 preference elicitation.ti,ab. (261)
- 56 health utilit\*.ti,ab. (3331)
- 57 utility value\*.ti,ab. (2815)
- 58 utility score\*.ti,ab. (2530)
- 59 Utility estimate\*.ti,ab. (494)
- 60 health state.ti,ab. (6770)
- 61 feeling thermometer\*.ti,ab. (86)
- 62 best-worst scaling.ti,ab. (306)
- 63 standard gamble.ti,ab. (1081)
- 64 time trade-off.ti,ab. (1674)
- 65 TTO.ti,ab. (1635)
- 66 probability trade-off.ti,ab. (24)
- 67 utility score.ti,ab. (1024)
- 68 preference based.ti,ab. (1839)
- 69 preference score\*.ti,ab. (654)
- 70 multiattribute.ti,ab. (376)
- 71 multi attribute.ti,ab. (721)
- 72 EuroQol 5D.ti,ab. (2064)
- 73 EuroQol5D.ti,ab. (39)
- 74 EQ5D.ti,ab. (1812)
- 75 EQ 5D.ti,ab. (14809)
- 76 SF6D.ti,ab. (110)
- 77 SF 6D.ti,ab. (1370)
- 78 HUI.ti,ab. (1774)
- 79 15D.ti,ab. (2541)
- 80 decision support system/ (21812)
- 81 or/11-80 (1879990)
- 82 (patient adj3 (value\* or preference\*)).ti,ab. (25871)



- 83 (patient\* adj5 (report\* or relate\*) adj5 (outcome\* or measure\* or assess\*)).mp. (73476)
- 84 patient participation/ or doctor patient relation/ or nurse patient relationship/ or patient attitude/ or patient preference/ or patient satisfaction/ or patient compliance/ or medication compliance/ or patient decision making/ or patient education/ or chronic patient/ or attitude to health/ or "quality of life"/ or self care/ or self concept/ or self examination/ or adaptive behavior/ or coping behavior/ or coping.ab,ti. or needs assessment/ or personal autonomy/ or patient advocacy/ or life event/ (1037242)
- 85 (patient\* adj3 (prefer\* or participat\* or involve\* or perspective\* or view\* or activat\* or empower\* or collaborate)).mp. [mp=title, abstract, heading word, drug trade name, original title, device manufacturer, drug manufacturer, device trade name, keyword, floating subheading word, candidate term word] (234656)
- 86 (patient\* adj2 (attitude\* or decision\* or needs\*)).mp. [mp=title, abstract, heading word, drug trade name, original title, device manufacturer, drug manufacturer, device trade name, keyword, floating subheading word, candidate term word] (119435)
- 87 expert patient\*.mp. (478)
- 88 (patient\* and (centre\* or center\* or focus\*)).mp. [mp=title, abstract, heading word, drug trade name, original title, device manufacturer, drug manufacturer, device trade name, keyword, floating subheading word, candidate term word] (1258089)
- 89 patient decision making/ (9864)
- 90 patient\*.mp. and (decision making/ or medical decision making/ or cooperation/ or distress syndrome/ or emotional stress/) [mp=title, abstract, heading word, drug trade name, original title, device manufacturer, drug manufacturer, device trade name, keyword, floating subheading word, candidate term word] (180387)
- 91 or/82-90 (2444470)
- 92 81 or 91 (3858388)
- 93 10 and 92 (13785)
- 94 (chronic adj4 pain\*).mp. [mp=title, abstract, heading word, drug trade name, original title, device manufacturer, drug manufacturer, device trade name, keyword, floating subheading word, candidate term word] (113744)
- 95 chronic pain/ (59665)
- 96 exp osteoarthritis/ (124667)
- 97 osteoarthritis\*.mp. (138729)
- 98 osteo-arthritis\*.mp. (511)
- 99 degenerative arthritis\*.mp. (1541)
- 100 exp rheumatoid arthritis/ (196173)
- 101 exp neuralgia/ (102320)
- 102 diabetic neuropathy/ (23303)
- 103 (neuropath\* adj5 (pain or diabet\*)).mp. [mp=title, abstract, heading word, drug trade name, original title, device manufacturer, drug manufacturer, device trade name, keyword, floating subheading word, candidate term word] (72882)
- 104 neuralg\*.mp. (29911)

- 105 zoster.mp. (37512)
- 106 irritable colon/ (25493)
- 107 (irritable bowel syndrome or IBS).mp. [mp=title, abstract, heading word, drug trade name, original title, device manufacturer, drug manufacturer, device trade name, keyword, floating subheading word, candidate term word] (24789)
- 108 exp migraine/ (62395)
- 109 migrain\*.mp. (69650)
- 110 fibromyalgia/ (19936)
- 111 fibromyalg\*.mp. (21561)
- 112 reflex sympathetic dystrophy.mp. (2353)
- 113 complex regional pain syndrome.mp. (7426)
- 114 causalgia.mp. (1039)
- 115 intractable pain/ (4766)
- 116 phantom limb/ or phantom pain/ (2434)
- 117 agnosia/ (3053)
- 118 amputation stump/ (2062)
- 119 exp hyperalgesia/ (20518)
- 120 ((noncancer\* or non-cancer\* or chronic\* or recurrent or persist\* or non-malign\*) adj3 pain).mp. [mp=title, abstract, heading word, drug trade name, original title, device manufacturer, drug manufacturer, device trade name, keyword, floating subheading word, candidate term word] (130063)
- 121 exp backache/ (106576)
- 122 radiculopathy/ or radiculopath\*.mp. (13603)
- 123 exp bone pain/ (17842)
- 124 exp musculoskeletal pain/ (145426)
- 125 arthralgia/ (59500)
- 126 headache\*.mp. (271974)
- 127 exp "headache and facial pain"/ (296382)
- 128 temporomandibular joint disorder/ (13611)
- 129 ((TMJ or TMJD) and pain\*).mp. [mp=title, abstract, heading word, drug trade name, original title, device manufacturer, drug manufacturer, device trade name, keyword, floating subheading word, candidate term word] (3753)
- 130 whiplash.mp. or whiplash injury/ (4884)
- 131 exp cumulative trauma disorder/ (20498)
- 132 or/94-131 (1089097)
- 133 93 and 132 (1409)

## PsycInfo

Database: APA PsycInfo &lt;1806 to March Week 2 2020&gt;

Search Strategy:

- 
- 1 exp cannabis/ or exp cannabinoids/ or tetrahydrocannabinol/ (12784)
  - 2 (Cannabis or cannabinol or cannabinoid\* or cannabidiol or bhang or cannador or charas or ganja or ganjah or hashish or hemp or marihuana or marijuana or nabilone or cesamet or cesametic or ajulemic acid or cannabichromene or cannabielsoin or cannabigerol or tetrahydrocannabinol or dronabinol or levonantradol or nabiximols or palmidrol or tetrahydrocannabinolic acid or tetrahydro cannabinol or marinol or tetranabinex or sativex or endocannabinoid\*).mp. [mp=title, abstract, heading word, table of contents, key concepts, original title, tests & measures, mesh] (26408)
  - 3 marijuana laws/ or marijuana legalization/ or "cannabis use disorder"/ or marijuana usage/ (3594)
  - 4 (epidiolex or gwp 42003p or gwp42003p or nabidiolex or dronabinol or thc or tetrahydrocannabinol\* or ea 1477 or ea1477 or marinol or qcd 84924 or syndros or tetranabinex or tetranabinex or cesamet or nabilone or deltanyne or "abbott 40566" or namisol or dronabinolum or "QCD 84924" or "CCRIS 4726" or nabiximol? or "gw 1000" or gw1000 or "sab 378" or sab378 or sativex).mp. [mp=title, abstract, heading word, table of contents, key concepts, original title, tests & measures, mesh] (3193)
  - 5 or/1-4 (26475)
  - 6 \*health attitudes/ (8084)
  - 7 \*client participation/ (1678)
  - 8 exp \*client attitudes/ (17349)
  - 9 preference\*.ti,ab. (95876)
  - 10 choice.ti. (21402)
  - 11 choices.ti. (4602)
  - 12 value.ti. (18077)
  - 13 health state values.ti,ab. (77)
  - 14 valuation\*.ti. (983)
  - 15 expectation\*.ti,ab. (80049)
  - 16 attitude\*.ti,ab. (201050)
  - 17 acceptab\*.ti,ab. (38902)
  - 18 knowledge.ti,ab. (290890)
  - 19 point of view.ti,ab. (20482)
  - 20 user participation.ti,ab. (282)
  - 21 users participation.ti,ab. (46)

- 22 patient participation.ti,ab. (788)
- 23 patients participation.ti,ab. (264)
- 24 patient perspective\*.ti,ab. (980)
- 25 patients perspective\*.ti,ab. (1752)
- 26 user perspective\*.ti,ab. (340)
- 27 users perspective\*.ti,ab. (345)
- 28 patient perce\*.ti,ab. (1343)
- 29 patients perce\*.ti,ab. (3398)
- 30 health perception\*.ti,ab. (1230)
- 31 user perce\*.ti,ab. (393)
- 32 users perce\*.ti,ab. (888)
- 33 user view\*.ti,ab. (95)
- 34 users view\*.ti,ab. (289)
- 35 patient view\*.ti,ab. (210)
- 36 patients view\*.ti,ab. (1022)
- 37 ((decision\* and mak\*).ti. or (decision mak\* or decisions mak\*).ti,ab.) and (patient\* or user\* or men or women).ti,ab. (21062)
- 38 discrete choice\*.ti,ab. (960)
- 39 decision board\*.ti,ab. (16)
- 40 decision analy\*.ti,ab. (1133)
- 41 decision-support.ti,ab. (3235)
- 42 decision tool\*.ti,ab. (169)
- 43 decision aid\*.ti,ab. (1252)
- 44 discrete-choice\*.ti,ab. (960)
- 45 \*Decision Making/ and (patient\* or user\* or men or women).ti. (3428)
- 46 (health and utilit\*).ti. (467)
- 47 gamble\*.ti,ab. (5406)
- 48 prospect theory.ti,ab. (964)
- 49 preference score.ti,ab. (93)
- 50 preference elicitation.ti,ab. (134)
- 51 health utilit\*.ti,ab. (532)
- 52 utility value\*.ti,ab. (490)
- 53 utility score\*.ti,ab. (334)

- 54 Utility estimate\*.ti,ab. (103)
- 55 health state.ti,ab. (958)
- 56 feeling thermometer\*.ti,ab. (58)
- 57 best-worst scaling.ti,ab. (109)
- 58 standard gamble.ti,ab. (210)
- 59 time trade-off.ti,ab. (279)
- 60 TTO.ti,ab. (190)
- 61 probability trade-off.ti,ab. (5)
- 62 utility score.ti,ab. (101)
- 63 preference based.ti,ab. (648)
- 64 preference score\*.ti,ab. (402)
- 65 multiattribute.ti,ab. (531)
- 66 multi attribute.ti,ab. (567)
- 67 EuroQol 5D.ti,ab. (206)
- 68 EuroQol5D.ti,ab. (0)
- 69 EQ5D.ti,ab. (61)
- 70 EQ 5D.ti,ab. (1677)
- 71 SF6D.ti,ab. (10)
- 72 SF 6D.ti,ab. (284)
- 73 HUI.ti,ab. (445)
- 74 15D.ti,ab. (170)
- 75 decision support systems/ (3245)
- 76 or/6-75 (744950)
- 77 client attitudes/ or client satisfaction/ (21785)
- 78 values/ or personal values/ or social values/ (22591)
- 79 (patient\* adj3 (prefer\* or participat\* or involve\* or perspective\* or view\* or activat\* or empower\* or collaborate)).mp. (27273)
- 80 (patient\* adj2 (attitude\* or decision\* or needs\*)).mp. (23750)
- 81 or/77-80 (85433)
- 82 76 or 81 (783705)
- 83 5 and 82 (3282)
- 84 chronic pain/ (13151)
- 85 chronic illness/ and pain.mp. (916)

- 86 back pain/ (3813)  
87 ((chronic\* or persist\* or refractor\* or intract\* or manag\* or back) adj3 pain).mp. (34808)  
88 or/84-87 (35275)  
89 (chronic adj4 pain\*).mp. [mp=title, abstract, heading word, table of contents, key concepts, original title, tests & measures, mesh] (22123)  
90 exp arthritis/ (4140)  
91 osteoarthrit\*.mp. [mp=title, abstract, heading word, table of contents, key concepts, original title, tests & measures, mesh] (2121)  
92 osteo-arthrit\*.mp. [mp=title, abstract, heading word, table of contents, key concepts, original title, tests & measures, mesh] (9)  
93 degenerative arthrit\*.mp. [mp=title, abstract, heading word, table of contents, key concepts, original title, tests & measures, mesh] (15)  
94 exp Neuralgia/ (931)  
95 exp Neuropathy/ (6243)  
96 (neuropath\* adj5 (pain or diabet\*)).mp. [mp=title, abstract, heading word, table of contents, key concepts, original title, tests & measures, mesh] (6749)  
97 neuralg\*.mp. [mp=title, abstract, heading word, table of contents, key concepts, original title, tests & measures, mesh] (3310)  
98 zoster.mp. (577)  
99 irritable bowel syndrome/ (1152)  
100 (IBS or irritable colon or irritable bowel).mp. [mp=title, abstract, heading word, table of contents, key concepts, original title, tests & measures, mesh] (2001)  
101 exp headache/ (15176)  
102 migrain\*.mp. (12832)  
103 fibromyalgia/ (1972)  
104 fibromyalg\*.mp. [mp=title, abstract, heading word, table of contents, key concepts, original title, tests & measures, mesh] (3408)  
105 "complex regional pain syndrome (type i)"/ (152)  
106 (complex regional pain syndrome\* or causalgia).mp. [mp=title, abstract, heading word, table of contents, key concepts, original title, tests & measures, mesh] (821)  
107 somatosensory disorders/ (1367)  
108 hyperalgesi\*.mp. (5320)  
109 exp Somatoform Disorders/ (15194)  
110 ((noncancer\* or non-cancer\* or chronic\* or recurrent or persist\* or non-malign\*) adj3 pain).mp. [mp=title, abstract, heading word, table of contents, key concepts, original title, tests & measures, mesh] (23779)  
111 radiculopath\*.mp. [mp=title, abstract, heading word, table of contents, key concepts, original title, tests & measures, mesh] (351)  
112 ((back or musculoskeletal) adj3 pain\*).mp. [mp=title, abstract, heading word, table of contents, key concepts, original title, tests & measures, mesh] (7604)  
113 arthralgia.mp. [mp=title, abstract, heading word, table of contents, key concepts, original title, tests & measures, mesh] (317)  
114 headache\*.mp. [mp=title, abstract, heading word, table of contents, key concepts, original title, tests & measures, mesh] (22401)  
115 (backache\* or backpain or dorsalg\* or arthralgi\* or polyarthralgi\* or arthrodyn\* or myalgi\* or fibromyalg\* or myodyn\* or neuralg\* or ischialg\* or crps or

rachialgi\*).mp. [mp=title, abstract, heading word, table of contents, key concepts, original title, tests & measures, mesh] (8315)

116 ((back or discogen\* or bone or musculoskelet\* or muscle\* or skelet\* or spinal or spine or vertebra\* or joint\* or arthrit\* or intestin\* or neuropath\* or neck or cervical\* or head or facial\* or complex or radicular or cervicobrach\* or orofacial or somatic or shoulder\* or knee\* or hip or hips\*) adj3 pain).mp. [mp=title, abstract, heading word, table of contents, key concepts, original title, tests & measures, mesh] (20949)

117 or/84-116 (93580)

118 83 and 117 (86)

119 5 and 82 and 117 (86)

**Appendix 2 Data extraction form**

|                                                                                                                                                                                                                      |
|----------------------------------------------------------------------------------------------------------------------------------------------------------------------------------------------------------------------|
| <b>Researcher identification</b>                                                                                                                                                                                     |
| Surname, name                                                                                                                                                                                                        |
| <b>Study identification</b>                                                                                                                                                                                          |
| Study ID                                                                                                                                                                                                             |
| Country                                                                                                                                                                                                              |
| Funding                                                                                                                                                                                                              |
| <b>Study objectives or research questions</b>                                                                                                                                                                        |
| <b>Study population</b>                                                                                                                                                                                              |
| Description of patients                                                                                                                                                                                              |
| Response rate/ completion rate                                                                                                                                                                                       |
| Male %                                                                                                                                                                                                               |
| Age                                                                                                                                                                                                                  |
| White %                                                                                                                                                                                                              |
| Chronic pain %                                                                                                                                                                                                       |
| Patients ever used cannabis %                                                                                                                                                                                        |
| Opioids use %                                                                                                                                                                                                        |
| <b>Aim intervention</b>                                                                                                                                                                                              |
| <b>Study design and methods</b>                                                                                                                                                                                      |
| Study design                                                                                                                                                                                                         |
| Sampling                                                                                                                                                                                                             |
| Sample size                                                                                                                                                                                                          |
| Data collection                                                                                                                                                                                                      |
| <b>Findings</b>                                                                                                                                                                                                      |
| Main findings (themes)                                                                                                                                                                                               |
| 1. Values and preferences of outcome of medical cannabis<br>1.1 Relative value or importance patients put on outcomes of medical cannabis;<br>1.2 Tradeoff between benefits and harms or burdens of medical cannabis |
| 2. Values and preferences towards medical cannabis<br>2.1 Values and preference for or against medical cannabis or choosing cannabis over                                                                            |



|                                                                                                                                              |
|----------------------------------------------------------------------------------------------------------------------------------------------|
| other medicines                                                                                                                              |
| 2.2 Values and preferences of different preparations of medical cannabis (e.g. administration routes, ingestion method, ratio of THC to CBD) |
| 3. Factors that influence the decision making regarding medical cannabis use                                                                 |
| 3.1 Factors that influence use or not use of medical cannabis                                                                                |
| 3.2 Factors that influence the choice of medical cannabis over other meds for pain management                                                |
| 3.3 Factors that influence the choice of different preparations of medical cannabis                                                          |
| Authors' interpretation                                                                                                                      |
| Authors' conclusions                                                                                                                         |

**Appendix 3 Tool and instructions for risk of bias assessment for quantitative studies**

| <b>Domains</b>                    | Participant selection                                                                                                                                                                                                                      | Completeness of data                                                                  | Choice of measurement instrument                                                                                                                                 | Administration of measurement instrument                                                                                           | Outcome/health state presentation                                                                                                                                                                               | Participants' understanding of the measurement instrument                                                                                     | Data analysis                                                                                                                        | Overall risk of bias                                                                                                                                                                                                                                                                  |
|-----------------------------------|--------------------------------------------------------------------------------------------------------------------------------------------------------------------------------------------------------------------------------------------|---------------------------------------------------------------------------------------|------------------------------------------------------------------------------------------------------------------------------------------------------------------|------------------------------------------------------------------------------------------------------------------------------------|-----------------------------------------------------------------------------------------------------------------------------------------------------------------------------------------------------------------|-----------------------------------------------------------------------------------------------------------------------------------------------|--------------------------------------------------------------------------------------------------------------------------------------|---------------------------------------------------------------------------------------------------------------------------------------------------------------------------------------------------------------------------------------------------------------------------------------|
| <b>Questions</b>                  | Was the study sample selected in a manner to ensure the representativeness to the target population?                                                                                                                                       | Was the attrition sufficiently low to minimize the risk of bias?                      | Was the choice of the methodology appropriate for addressing the study aim?                                                                                      | Was the instrument (or tools that was used to elicit values and preferences, e.g. questionnaire) administered in the intended way? | Was a valid representation of the outcome/health state (e.g. a state of pain relief - a beneficial outcome of medical cannabis, or an experience of coughing - a harmful outcome of medical cannabis) utilized? | Did the researchers check the understanding to the measurement techniques (e.g. questionnaire in a survey)?                                   | Were the results analyzed appropriately?                                                                                             |                                                                                                                                                                                                                                                                                       |
| <b>Instructions for questions</b> | The sampling strategy solely does not determine the risk of bias; if there is a subset of the population more or less likely to be reached, the answer for "was the study sample selected in a manner to ensure the representativeness" is | Response rate for 80% or higher would be considered high for a cross-sectional study. | Consider yes or probably yes for the following methodologies: standard gamble, time trade off, visual analogue scale (or feeling thermometers), discrete choice, | -                                                                                                                                  | If the researchers demonstrated they were using available evidence to support the health state presentation, the answer should be yes or probably yes.                                                          | If the methodology is simple, choosing "the investigators did not formally test the understanding, but the results suggested it was adequate" | To answer this question, reviewers also need to consider whether the adjustment, stratification, or model selection was appropriate. | <ul style="list-style-type: none"> <li>· Low risk of bias= The study is classified as with low risk of bias across subdomains.</li> <li>· Moderate risk of bias= The study is classified as low (Yes -&gt; low risk of bias) or moderate (Probably yes -&gt; moderate risk</li> </ul> |

yes or probably yes.

treatment  
trade-off,  
willingness to  
pay

could be  
appropriate.  
If the  
researchers  
piloted the  
methodology,  
choosing “the  
investigators  
did not formally  
test the  
understanding,  
but the results  
suggested it  
was adequate”  
may also be  
appropriate.

This domain  
may not be  
applicable to  
all primary  
studies  
because not  
all studies will  
require  
controlled  
data analysis.  
Please check  
"NA" if not  
applicable.

of bias) risk of bias  
across subdomains.  
· Serious risk of  
bias= The study is  
classified as serious  
risk of bias (Probably  
no -> serious risk of  
bias) for at least one  
subdomain but not  
classified as critical  
risk of bias for any  
subdomain.  
· Critical risk of  
bias=The study is  
classified as critical  
risk of bias (No ->  
critical risk of bias)  
for at least one  
subdomain.

**Appendix 4 Tool and instructions for methodological limitation assessments for qualitative studies**

| <b>Domains</b>                    | Aim of the research                                                                                                                                    | Qualitative methodology appropriateness                                                                                                                                                                                                     | Research design                                                                                                                                                         | Appropriate recruitment strategy                                                                                                                                                                                            | Data collection                                                                                                                                                                                                                            | Investigator-participant relationship                                                                                                                                                                                         | Ethical issues                                                                                                                                                                                                                                                  | Data analysis                                                                                                                                                                                                                                                                                      | Findings                                                                                                                                                                                   | Value of the research                                                                                                                                                                                                                                                                                    | Overall methodological limitations                                                                                                                                                                          |
|-----------------------------------|--------------------------------------------------------------------------------------------------------------------------------------------------------|---------------------------------------------------------------------------------------------------------------------------------------------------------------------------------------------------------------------------------------------|-------------------------------------------------------------------------------------------------------------------------------------------------------------------------|-----------------------------------------------------------------------------------------------------------------------------------------------------------------------------------------------------------------------------|--------------------------------------------------------------------------------------------------------------------------------------------------------------------------------------------------------------------------------------------|-------------------------------------------------------------------------------------------------------------------------------------------------------------------------------------------------------------------------------|-----------------------------------------------------------------------------------------------------------------------------------------------------------------------------------------------------------------------------------------------------------------|----------------------------------------------------------------------------------------------------------------------------------------------------------------------------------------------------------------------------------------------------------------------------------------------------|--------------------------------------------------------------------------------------------------------------------------------------------------------------------------------------------|----------------------------------------------------------------------------------------------------------------------------------------------------------------------------------------------------------------------------------------------------------------------------------------------------------|-------------------------------------------------------------------------------------------------------------------------------------------------------------------------------------------------------------|
| <b>Questions</b>                  | Was there a clear statement of the aims of the research?                                                                                               | Is a qualitative methodology appropriate?                                                                                                                                                                                                   | Was the research design appropriate to address the aims of the research?                                                                                                | Was the recruitment strategy appropriate to the aims of the research?                                                                                                                                                       | Was the data collected in a way that addressed the research issue?                                                                                                                                                                         | Has the relationship between researcher and participants been adequately considered?                                                                                                                                          | Have ethical issues been taken into consideration?                                                                                                                                                                                                              | Was the data analysis sufficiently rigorous?                                                                                                                                                                                                                                                       | Is there a clear statement of findings?                                                                                                                                                    | How valuable is the research?                                                                                                                                                                                                                                                                            |                                                                                                                                                                                                             |
| <b>Instructions for questions</b> | <ul style="list-style-type: none"> <li>· what was the goal of the research</li> <li>· why it was thought important</li> <li>· its relevance</li> </ul> | <ul style="list-style-type: none"> <li>· If the research seeks to illuminate the actions and/or subjective experiences of participants</li> <li>· Is qualitative research the right methodology for addressing the research goal</li> </ul> | <ul style="list-style-type: none"> <li>· if the researcher has justified the research design (e.g. have they discussed how they decided which method to use)</li> </ul> | <ul style="list-style-type: none"> <li>· If the researcher has explained how the participants were selected</li> <li>· If they explained why the participants they selected were the most appropriate to provide</li> </ul> | <ul style="list-style-type: none"> <li>· If the setting for the data collection was justified</li> <li>· If it is clear how data were collected</li> <li>· If the researcher has justified the methods chosen</li> <li>· If the</li> </ul> | <ul style="list-style-type: none"> <li>· If the researcher critically examined their own role, potential bias and influence during (a) formulation of the research questions (b) data collection, including sample</li> </ul> | <ul style="list-style-type: none"> <li>· If there are sufficient details of how the research was explained to participants to assess whether ethical standards were maintained</li> <li>· If the researcher has discussed issues raised by the study</li> </ul> | <ul style="list-style-type: none"> <li>· If there is an in-depth description of the analysis process</li> <li>· If thematic analysis is used. If so, is it clear how the categories/themes were derived from the data</li> <li>· Whether the researcher explains how the data presented</li> </ul> | <ul style="list-style-type: none"> <li>· If the findings are explicit</li> <li>· If there is adequate discussion of the evidence both for and against the researcher's argument</li> </ul> | <ul style="list-style-type: none"> <li>· If the researcher discusses the contribution the study makes to existing knowledge or understanding (e.g. do they consider the findings in relation to current practice or policy, or relevant research-based literature</li> <li>· If they identify</li> </ul> | <ul style="list-style-type: none"> <li>· Serious = if more than 2 questions had "No".</li> <li>· Moderate = if 2 questions had "No".</li> <li>· No or minor = if less than 2 questions had "No".</li> </ul> |

access to researcher recruitment (e.g. issues were selected · If the new areas where  
the type of has made and choice around from the researcher research is  
knowledge the of location informed original has necessary  
sought by methods · How the consent or sample to discussed · If the  
the study explicit researcher confidentiality demonstrate the the researchers have  
· If there · If responded or how they the analysis credibility discussed  
are any methods to events have handled the effects of · If sufficient of their whether or how  
discussions were during the study and the study on data are findings the findings can  
around modified during the whether the participants presented to findings be transferred to  
recruitment during the study. If they considered during and findings are other  
(e.g. why so, has the researcher after the study) support the discussed populations or  
some people chose not explained implications of any changes in the research design the ethics committee  
to take how and why · If the form of data is clear · If the researcher  
part) · If the researcher has discussed saturation of data

implications of any changes in the research design the ethics committee

· If approval has been sought from the ethics committee

· To what extent contradictory data are taken into account · Whether the researcher critically examined their own role, potential bias and influence during analysis and selection of data for presentation

· If the researcher has discussed the credibility of their findings · If the findings are discussed in relation to the original research question

· If the researchers have discussed whether or how the findings can be transferred to other populations or considered other ways the research may be used

## Appendix 5 Characteristics of the included studies

| Study ID     | Country       | Funding sources      | Primary focus                                                                                                                 | Study design                          | Data collection methods              | Sampling    | Participants, n | Male Sex, % | Chronic pain, % | Chronic cancer pain, % | Prior use of cannabis, % | Risk of Bias/ Methodological Limitations |
|--------------|---------------|----------------------|-------------------------------------------------------------------------------------------------------------------------------|---------------------------------------|--------------------------------------|-------------|-----------------|-------------|-----------------|------------------------|--------------------------|------------------------------------------|
| Bigand 2019  | United States | Non-industry funding | To examine the perceived effects of medical cannabis among patients who are prescribed opioids for persistent pain conditions | Qualitative, Descriptive              | Questionnaire                        | Convenience | 150             | 31.3        | 100             | NR                     | 69.3                     | Serious                                  |
| Boehnke 2019 | United States | NR                   | To assess preferences towards medical cannabis products among medical cannabis users with chronic pain                        | Quantitative, Cross-sectional         | Questionnaire                        | Convenience | 1321            | 40.9        | NR <sup>a</sup> | NR                     | 100                      | Moderate                                 |
| Bruce 2018   | United States | Non-industry funding | To assess approaches to medical cannabis use vis-a-vis prescription medications among patients with chronic conditions        | Qualitative, Descriptive              | Semi-structured telephone interviews | Convenience | 30              | 60.3        | NR <sup>b</sup> | NR                     | 100                      | No or minor                              |
| Cooke 2019   | United States | Non-industry funding | To explore perspectives on the co-use of medical cannabis and opioids among clinicians, and                                   | Qualitative, Modified grounded theory | Semi-structured in-person interviews | Purposive   | 46              | 45.6        | 100             | 0                      | 45.7 <sup>c</sup>        | Moderate                                 |

|                 |                |                      |                                                                                                                                                                                                                     |                               |                                         |             |      |      |                 |                  |      |          |
|-----------------|----------------|----------------------|---------------------------------------------------------------------------------------------------------------------------------------------------------------------------------------------------------------------|-------------------------------|-----------------------------------------|-------------|------|------|-----------------|------------------|------|----------|
| Degenhardt 2015 | Australia      | Non-industry funding | patients with both chronic non-cancer pain and a history of substance use<br>To investigate patterns and correlates of medical cannabis use among patients who are prescribed opioids for chronic non-cancer pain   | Quantitative, Cross-sectional | Questionnaire, and diagnostic interview | Purposive   | 1514 | 44.4 | 100             | 0                | 43   | Moderate |
| Gallagher 2003  | Canada         | NR                   | To survey willingness to try medical cannabis among patients with a known advanced life-limiting illness <sup>d</sup> , and to assess this population's knowledge about medical cannabis                            | Quantitative, Cross-sectional | Discrete choice, VAS, Likert scales     | Purposive   | 68   | 44.6 | NR <sup>e</sup> | 100 <sup>d</sup> | 35.3 | Critical |
| Gill 2001       | United Kingdom | NR                   | To investigate beliefs about cannabinoids and the associations between those beliefs, beliefs about medication, and personal and pain variables in relation to willingness to try cannabinoids as analgesics, among | Quantitative, Cross-sectional | Questionnaire                           | Convenience | 65   | 45   | 100             | NR               | NR   | Serious  |

|                  |                |                      |                                                                                                                                                                                                                                                                                                            |                               |                                      |             |     |      |                 |     |     |             |
|------------------|----------------|----------------------|------------------------------------------------------------------------------------------------------------------------------------------------------------------------------------------------------------------------------------------------------------------------------------------------------------|-------------------------------|--------------------------------------|-------------|-----|------|-----------------|-----|-----|-------------|
| Heng 2018        | United States  | NR                   | patients with chronic pain who had interest in trying medical cannabis as an analgesic<br>To assess beliefs regarding using marijuana for medicine, post injury pain and speaking about marijuana to their health care providers, among patients who have a musculoskeletal injury in the last 1-6 months. | Quantitative, Cross-sectional | Questionnaire                        | Convenience | 500 | 50   | NR <sup>f</sup> | NR  | 60  | Moderate    |
| Lavie-Ajayi 2019 | Israel         | Non-industry funding | To explore and characterize the experience of using medical cannabis for chronic pain among patients receiving medical cannabis for at least three months                                                                                                                                                  | Qualitative, Phenomenological | Semi-structured in-person interviews | Purposive   | 19  | 52.6 | 100             | 5.3 | 100 | No or minor |
| Notcutt 2004     | United Kingdom | Non-industry funding | To evaluate the safety and tolerability of three CBMEs among patients with stable chronic pain, and poorly responsive to other modalities                                                                                                                                                                  | Quantitative, RCT             | NR                                   | Convenience | 34  | 32   | 100             | NR  | NR  | Moderate    |



|                    |               |                      |                                                                                                                                                                   |                                |                                                      |                          |      |      |                  |      |     |          |
|--------------------|---------------|----------------------|-------------------------------------------------------------------------------------------------------------------------------------------------------------------|--------------------------------|------------------------------------------------------|--------------------------|------|------|------------------|------|-----|----------|
| Piper 2017         | United States | Non-industry funding | To survey perspectives of medical cannabis among legal members of medical cannabis dispensaries, and to examine the strengths and limitations of medical cannabis | Mixed Methods, Cross-sectional | Online survey, discrete choice, open-ended questions | Convenience and snowball | 984  | 47.1 | 100 <sup>g</sup> | 16.7 | 100 | Serious  |
| Rochford 2019      | Ireland       | NR                   | To evaluate attitudes towards medicinal cannabis among patients who attend chronic pain clinics                                                                   | Quantitative, Cross-sectional  | Questionnaire                                        | Convenience              | 96   | 39.6 | 100              | 22.9 | NR  | Serious  |
| Satterlund 2015    | United States | Non-industry funding | To assess perceived risk, concern or overall stigma of marijuana use, and how this stigma may affect the health care among medical marijuana users <sup>c</sup>   | Qualitative, Descriptive       | Semi-structured interviews                           | Convenience and snowball | 18   | 72   | NR <sup>h</sup>  | NR   | 100 | Moderate |
| Sexton 2016        | United States | Non-industry funding | To survey the patterns of use and perceived efficacy of medical cannabis among patients who have used medical cannabis in the last 90 days                        | Quantitative, Cross-sectional  | Questionnaire                                        | Convenience              | 1429 | 54.6 | NR <sup>i</sup>  | NR   | 100 | Moderate |
| Zarrabi/Singh 2019 | United States | Non-industry         | To survey perceptions of the benefits and                                                                                                                         | Quantitative, Cross-           | Questionnaire                                        | Convenience              | 101  | 55.7 | 100              | 75.5 | 100 | Serious  |

funding harms of medical cannabis, concerns about access to cannabis, and perceptions of support from family and health care providers, among patients with serious illness in APC sectional

---

**Note:**

Abbreviation: APC: ambulatory palliative care, CBMEs: cannabis based medicinal extracts, CNCP: chronic non-cancer pain, NR: Not reported, RCT: Randomized controlled trial, US: United states, VAS: Visual Analogue Scale.

a Chronic overlapping pain conditions: back pain 58%, migraine 21%, fibromyalgia 15%, irritable bowel disease or Crohn's disease 14%, temporomandibular joint disorder 6%.

b Rheumatoid arthritis 23.3%, spinal cord disease or injury 20%, Chron's disease 20%, cancer 13.3%, hepatitis C 13.3%, post-traumatic stress disorder (PTSD) 13.3%, severe fibromyalgia 10%, other (chronic regional pain syndrome, epilepsy, HIV, MS, Parkinson's) 23.3%.

c Majority ( $\geq 80\%$ ) were patients with chronic and severe pain.

d Advanced life-limiting illnesses include malignancy, advanced cardiac, respiratory, liver or neurological diseases.

e The mean score of intensity of pain was 4.9 on a 0 to 10 VAS scale (0= absence of pain, 10=the worst pain intensity imaginable).

f Patients had experienced a musculoskeletal injury between 1 to 6 months before entry into the study.

g All the participants were legal members of medical cannabis dispensaries in the north-eastern US. Sixty-four percent of patients reported that they had been diagnosed with chronic pain by a medical professional.

h The authors stated "Maladies for which respondents used medical marijuana included migraine headaches, depression, chemotherapy and radiation treatment effects, chronic pain, and asthma, with the majority citing chronic and severe pain".

i Sixty-one percent of patients reported chronic pain, 35.5% had headache/migraine and the remaining 3.5% had other chronic pain conditions.

**Appendix 6 Excluded studies and reasons for exclusion in full text screening**

| <b>Study ID</b>        | <b>Reason for exclusion</b> |
|------------------------|-----------------------------|
| 1. Aggarwal 2014       | Not value and preference    |
| 2. Allan 2018          | Not value and preference    |
| 3. Bekker 2018         | Not value and preference    |
| 4. Cairns 2017         | Not value and preference    |
| 5. Caplan B 2018       | Not value and preference    |
| 6. Choo 2016           | Not value and preference    |
| 7. Nickel 2018         | Not value and preference    |
| 8. Djulus 2005         | Not value and preference    |
| 9. Dowden 2019         | Not value and preference    |
| 10. Gieringer 2003     | Not value and preference    |
| 11. Harrison 2013      | Not value and preference    |
| 12. Kepple 2016        | Not value and preference    |
| 13. Kinnucan 2018      | Not value and preference    |
| 14. Bachhuber 2018     | Not value and preference    |
| 15. Zolotov 2016       | Not value and preference    |
| 16. Lum 2019           | Not value and preference    |
| 17. Martins-Welch 2017 | Not value and preference    |
| 18. Naguib 2015        | Not value and preference    |
| 19. Page 2015          | Not value and preference    |
| 20. Parmar 2016        | Not value and preference    |
| 21. Paut Kusturica2019 | Not value and preference    |
| 22. Pearce 2014        | Not value and preference    |
| 23. Pink 2012          | Not value and preference    |
| 24. Piper 2018         | Not value and preference    |
| 25. Reid 2013          | Not value and preference    |
| 26. Reiman 2008        | Not value and preference    |
| 27. Reisfield 2009     | Not value and preference    |
| 28. Reynolds 2017      | Not value and preference    |
| 29. Reynolds 2018      | Not value and preference    |
| 30. Ste-Marie 2015     | Not value and preference    |

|                            |                          |
|----------------------------|--------------------------|
| 31. Sutherland 2016        | Not value and preference |
| 32. Teigen 2019            | Not value and preference |
| 33. Toth 2015              | Not value and preference |
| 34. Volkow 2017            | Not value and preference |
| 35. Wallace 2015           | Not value and preference |
| 36. Wan 2017               | Not value and preference |
| 37. Ware 2010              | Not value and preference |
| 38. Wilsey 2015            | Not value and preference |
| 39. Winston-McPherson 2019 | Not value and preference |
| 40. Zaller 2015            | Not value and preference |
| 41. Ziadni 2018            | Not value and preference |
| 42. Zvolensky 2011         | Not value and preference |
| 43. Aggarwal 2018          | Abstract only            |
| 44. Agornyo 2018           | Abstract only            |
| 45. Bar-Sela 2014          | Abstract only            |
| 46. Berg 2017              | Abstract only            |
| 47. Burks 2016             | Abstract only            |
| 48. Calvino 2017           | Abstract only            |
| 49. Cofield 2015           | Abstract only            |
| 50. Fitzcharles 2019       | Abstract only            |
| 51. Galvin 2018            | Abstract only            |
| 52. Gavigan 2019           | Abstract only            |
| 53. Grella 2015            | Abstract only            |
| 54. Gustavsen 2018         | Abstract only            |
| 55. Kiszko 2017            | Abstract only            |
| 56. Lee 2012               | Abstract only            |
| 57. Mitra 2019             | Abstract only            |
| 58. Muirhead 2015          | Abstract only            |
| 59. Pires 2018             | Abstract only            |
| 60. Rhyne 2019             | Abstract only            |
| 61. Sabet 2014             | Abstract only            |
| 62. Schnelle 1999          | Abstract only            |

---

|                          |                                                                      |
|--------------------------|----------------------------------------------------------------------|
| 63. Wurtzen 2018         | Abstract only                                                        |
| 64. Grinberg 2018        | Not patients with chronic pain or their carer                        |
| 65. Iskedjian 2009       | Not patients with chronic pain or their carer                        |
| 66. Grotenhermen 2003    | Not patients with chronic pain or their carer                        |
| 67. LAU 2015             | Not patients with chronic pain or their carer                        |
| 68. Ishida 2019          | Not patients with chronic pain or their carer                        |
| 69. Lucas 2019           | Not patients with chronic pain or their carer                        |
| 70. Wan 2017             | Not patients with chronic pain or their carer                        |
| 71. Mendoza 2016         | Not patients with chronic pain or their carer                        |
| 72. Mendoza 2018         | Not patients with chronic pain or their carer                        |
| 73. Schenker 2019        | Not patients with chronic pain or their carer                        |
| 74. Sharon 2018          | Not patients with chronic pain or their carer                        |
| 75. St-Amant 2015        | Not patients with chronic pain or their carer                        |
| 76. Starrels 2018        | Not patients with chronic pain or their carer                        |
| 77. Starrels 2020        | Not patients with chronic pain or their carer                        |
| 78. Zolotov 2019         | Not patients with chronic pain or their carer                        |
| 79. Zolotov 2019         | Not patients with chronic pain or their carer                        |
| 80. Nouryan 2018         | Not patients with chronic pain or their carer                        |
| 81. Boehnke 2019         | Not patients with chronic pain or their carer                        |
| 82. Khelemsky 2017       | Not patients with chronic pain or their carer                        |
| 83. Vargas-Schaffer 2018 | Not cannabis                                                         |
| 84. Manchikanti 2008     | Not cannabis                                                         |
| 85. Mijatovic 2019       | Not cannabis                                                         |
| 86. Friedberg 2016       | Personal experience                                                  |
| 87. Greenberg 2019       | Personal experience                                                  |
| 88. Burke 2010           | Value and preference data not elicited from patients or their carers |

---

**List of excluded studies at full text screening and reasons for exclusion****1. Not value and preference (n=42)**

1. Aggarwal SK, Pangarkar S, Carter GT, Tribuzio B, Miedema M, Kennedy DJ. Medical marijuana for failed back surgical syndrome: A viable option for pain control or an uncontrolled narcotic? *PM and R*. 2014; 6: 363-72.
2. Allan GM, Ramji J, Perry D, Ton J, Beahm NP, Crisp N, et al. Simplified guideline for prescribing medical cannabinoids in primary care. *Can Fam Physician*. 2018; 64: 111-20.
3. Bekker A. Cannabis use and non-cancer chronic pain. *The Lancet Public Health*. 2018;3:e468.
4. Cairns EA, Kelly MEM. Why support a separate medical access framework for cannabis? *Cmaj*. 2017; 189: E927-E8.
5. Caulley L. Medical marijuana for chronic pain. *New England Journal of Medicine*. 2018; 379: 1575-7.
6. Choo EK, Ewing SWF, Lovejoy TI. Opioids Out, Cannabis in negotiating the unknowns in patient care for chronic pain. *JAMA - Journal of the American Medical Association*. 2016; 316: 1763-4.
7. Curtis Nickel J. Medical marijuana for urologic chronic pelvic pain. *Canadian Urological Association Journal*. 2018; 12: S181-S3.
8. Djulus J, Moretti M, Koren G. Motherisk update: Marijuana use and breastfeeding. *Can Fam Physician*. 2005; 51: 349-50.
9. Dowden A. Barriers to prescribing cannabis-based medicines. *Prescriber*. 2019; 30: 17-21.
10. Gieringer DH. The acceptance of medicinal marijuana in the U.S. *Journal of Cannabis Therapeutics*. 2003; 3: 53-65.
11. Harrison TE, Bruce BK, Weiss KE, Rummins TA, Bostwick JM. Marijuana and chronic nonmalignant pain in adolescents. *Mayo Clinic proceedings*. 2013; 88: 647-50.
12. Kepple NJ, Mulholland E, Freisthler B, Schaper E. Correlates of Amount Spent on Marijuana Buds During a Discrete Purchase at Medical Marijuana Dispensaries: Results from a Pilot Study. *Journal of Psychoactive Drugs*. 2016; 48: 50-5.
13. Kinnucan J. Use of medical cannabis in patients with inflammatory bowel disease. *Gastroenterology and Hepatology*. 2018; 14: 598-601.
14. Bachhuber MA, Arnsten JH, Starrels JL, Cunningham CO. Willingness to Participate in Longitudinal Research Among People with Chronic Pain Who Take Medical Cannabis: A Cross-Sectional Survey. *Cannabis and Cannabinoid Research*. 2018; 3: 45-53.

15. Zolotov Y, Baruch Y, Reuveni H, Magnezi R. Adherence to Medical Cannabis among Licensed Patients in Israel. *Cannabis and Cannabinoid Research*. 2016;1:16-21.
16. Lum HD. Medical Cannabis in Palliative Care: Meaningful Additions to the Research Evidence. *Journal of Palliative Medicine*. 2019;22:1173-4.
17. Martins-Welch D, Nouryan C, Kline M, Modayil S. Health providers' perspectives on medical marijuana use. *Journal of Clinical Oncology*. 2017;35 (31 Supplement 1):235.
18. Naguib M, Foss JF. Medical use of marijuana: Truth in evidence. *Anesthesia and Analgesia*. 2015;121:1124-7.
19. Page J, Ware M. Close the knowledge gap. *Nature*. 2015;525:S9.
20. Parmar JR, Forrest BD, Freeman RA. Medical marijuana patient counseling points for health care professionals based on trends in the medical uses, efficacy, and adverse effects of cannabis-based pharmaceutical drugs. *Res Social Adm Pharm*. 2016;12:638-54.
21. Paut Kusturica M, Tomas A, Sabo A, Tomic Z, Horvat O. Medical cannabis: Knowledge and attitudes of prospective doctors in Serbia. *Saudi Pharmaceutical Journal*. 2019;27:320-5.
22. Pearce DD, Mitsouras K, Irizarry KJ. Discriminating the effects of Cannabis sativa and Cannabis indica: a web survey of medical cannabis users. *J Altern Complement Med*. 2014;20:787-91.
23. Pink LR, Smith AJ, Peng PWH, Galonski MJ, Tumber PS, Evans D, et al. Intake assessment of problematic use of medications in a chronic noncancer pain clinic. *Pain Research and Management*. 2012;17:276-80.
24. Piper BJ. Mother of Berries, ACDC, or Chocolope: Examination of the Strains Used by Medical Cannabis Patients in New England. *Journal of Psychoactive Drugs*. 2018;50:95-104.
25. Reid A. Medical marihuana: More knowledge and clinical guidance needed. *CJAM Canadian Journal of Addiction Medicine*. 2013;4:21-2.
26. Reiman AE. Self-efficacy, social support and service integration at medical cannabis facilities in the San Francisco Bay area of California. *Health Soc Care Community*. 2008;16:31-41.
27. Reisfield GM, Wasan AD, Jamison RN. The prevalence and significance of cannabis use in patients prescribed chronic opioid therapy: A review of the extant literature. *Pain Medicine*. 2009;10:1434-41.
28. Reynolds I, Fixen D, Parnes B, Lum H, Church S, Linnebur SA, et al. Attitudes, characteristics, and patterns of Marijuana use in older adults in two outpatient geriatric clinics in Colorado. *Journal of the American Geriatrics Society*. 2017;65 (Supplement 1):S102.

29. Reynolds IR, Fixen DR, Parnes BL, Lum HD, Shanbhag P, Church S, et al. Characteristics and Patterns of Marijuana Use in Community-Dwelling Older Adults. *Journal of the American Geriatrics Society*. 2018;66:2167-71.
30. Ste-Marie P, Shir Y, Rampakakis E, Sampalis J, Cohen M, Starr M, et al. Profile of rheumatology patients using medical marijuana. *Journal of Rheumatology*. 2015;42 (7):1320.
31. Sutherland AM, Nicholls J, Clarke H. Medical cannabis: The pain physician's perspective. *Journal of Pain Management*. 2016;9:465-72.
32. Teigen IA, Serkland TT, Pahr T, Berg JA. Should more patients be offered treatment with cannabinoids? *Tidsskrift for Den Norske Laegeforening*. 2019;139:24.
33. Toth A, Possidente C, Sawyer L, DiParlo M, Fanciullo G. An evaluation of new England and national opioid prescribing trends during 2013-2014. *Regional Anesthesia and Pain Medicine Conference: 14th Annual Pain Medicine Meeting of the American Society of Regional Anesthesia and Pain Medicine, ASRA*. 2015;41.
34. Volkow ND, Collins FS. The authors reply. *New England Journal of Medicine*. 2017;377:1798.
35. Wallace MS, Ware MA. Medicinal marijuana here to stay and time to take responsibility. *Clinical Journal of Pain*. 2015;31:931-2.
36. Wan BA, Blake A, Chan S, Wolt A, Zaki P, Zhang L, et al. Patient characteristics from a medical cannabis provider. *Journal of Pain Management*. 2017;10:337-44.
37. Ware MA, St Arnaud-Trempe E. The abuse potential of the synthetic cannabinoid nabilone. *Addiction*. 2010;105:494-503.
38. Wilsey B, Atkinson JH, Marcotte TD, Grant I. The Medicinal Cannabis Treatment Agreement: Providing Information to Chronic Pain Patients Through a Written Document. *Clinical Journal of Pain*. 2015;31:1087-96.
39. Winston-McPherson GN, Lo SY, Baird GS, Hoofnagle AN, Greene DN. The Reply. *American Journal of Medicine*. 2019;132:e717.
40. Zaller N, Topletz A, Frater S, Yates G, Lally M. Profiles of medicinal cannabis patients attending compassion centers in rhode island. *Journal of Psychoactive Drugs*. 2015;47:18-23.
41. Ziadni M, Anastas T, Darnall B, Wilson A. Characterizing chronic pain in late adolescence and early adulthood: Opioid prescription, marijuana use, and predictors of pain interference. *Pain Medicine (United States)*. 2018;19 (4):856.
42. Zvolensky MJ, Cogle JR, Bonn-Miller MO, Norberg MM, Johnson K, Kosiba J, et al. Chronic pain and marijuana use among a nationally representative sample of adults. *American Journal on Addictions*. 2011;20:538-42.



**2. Abstract only (n=21)**

1. Aggarwal S, Bhowmick J, Sharma R, Singh M, Gond R K, Dash I, et al. Voice of cancer patients (VoCP): Patient perceptions regarding use of marijuana and its derivatives in cancer. *Journal of Clinical Oncology. Conference*.2018; 36 (34).
2. Agornyo P, Choi S, Dahmer S, Nouryan CN, Wolf-Klein G, Martins-Welch D. Older adults' use of medical marijuana for chronic pain: A multi-site community-based survey. *Journal of the American Geriatrics Society*. 2018;66 (Supplement 2):S123.
3. Bar-Sela G, Avisar A, Batash R, Schaffer M. Is the clinical use of cannabis by oncology patients advisable? *Current Medicinal Chemistry*. 2014;21:1923-30.
4. Berg AM, Andrus LT, Brace C. Impact of the medical cannabis pilot program in Illinois: A pharmacist perspective. *Consultant Pharmacist*. 2017;32 (10):602.
5. Burks AR, Crossman H, Black S, Limmer JS, Kohn M, Sheeder J. Understanding pregnant women's beliefs and attitudes about marijuana in colorado. *Obstetrics and Gynecology*. 2016;127 (Supplement 1):106S.
6. Calvino B. Advocacy for therapeutic use of cannabis and its derivatives in the treatment of chronic pain. *Douleurs*. 2017;18:59-62.
7. Cofield SS, Salter AR, Tyry T, Crowe C, McNeal S, Cutter GR, et al. Differences in use and perceptions on effectiveness of marijuana for MS: A survey of NARCOMS participants. *Multiple Sclerosis*. 2015;1):333.
8. Fitzcharles MA. Should rheumatologists see patients with fibromyalgia and prescribe marijuana. *International Journal of Rheumatic Diseases*. 2019;22 (Supplement 3):8-9.
9. Galvin D, Mulkerrin O. Cannabis-based medications: A comparison of patients' knowledge and awareness in pain, neurology and prescription out-patient settings. *Pain Practice*. 2018;18 (Supplement 1):60.
10. Gavigan K, Venkatachalam S, Curtis J, Ginsberg S, Benjamin Nowell W. Patients' perception and use of medical marijuana. *Annals of the Rheumatic Diseases*. 2019;78 (Supplement 2):617.
11. Grella CE, Cochran S, Mays V. Does health status influence attitudes about and use of medical marijuana? Findings from a general population survey in California. *Drug and Alcohol Dependence*. 2015;146:e130-e1.
12. Gustavsen S, Sondergaard HB, Andresen SR, Sorensen PS, Sellebjerg FT, Oturai AB. Medical and recreational cannabis use in patients with multiple sclerosis in Denmark. *Multiple Sclerosis Journal*. 2018;24 (2 Supplement):954-5.
13. Kiszko K, Patel K, Chudasama B, Samodulski J, Nienaber C, Martins-Welch D, et al. Older adults' perspectives on medical marijuana (MM) use. *Journal of the American Geriatrics Society*. 2017;65 (Supplement 1):S70.

14. Lee KM, MacDiarmid P, Shalansky S, Wilcox P. The use of self-administered medicinal cannabis for cystic fibrosis symptom management: Patient-reported experiences. *Pediatric Pulmonology*. 2012;35):436.
15. Mitra F, Woolley T. Perceived patient benefits from using prescription opioids and other therapies to manage persistent pain. *Journal of Opioid Management*. 2019;16:5-14.
16. Muirhead C. Marijuana and CF: Controversies associated with patient use. *Pediatric Pulmonology*. 2015;41):152-4.
17. Pires C, Lachiewicz M. A pilot survey of marijuana use and self-reported benefit in women with chronic pelvic pain. *Pain Medicine (United States)*. 2018;19 (4):890.
18. Rhyne R, Daitz B, Callan D, Sussman A, McKinney K, Sanchez C, et al. How patients decide what medical cannabis products to use for chronic pain: The patient-dispensary-doctor interface. *Medical Cannabis and Cannabinoids*. 2019;2 (2):75.
19. Sabet KA, Grossman E. Why do people use medical marijuana? The medical conditions of users in seven U.S. states. *Journal of Global Drug Policy and Practice*. 2014;8:1-26.
20. Schnelle M, Grotenhermen F, Reif M, Gorter RW. [Results of a standardized survey on the medical use of cannabis products in the German-speaking area]. *Forschende Komplementarmedizin*. 1999;6 Suppl 3:28-36.
21. Wurtzen H, Franchi F, Hojsted J. Investigating cognitive functioning in patients with chronic non-cancer pain (CNCP) before and during treatment with cannabis based medication - A longitudinal pilot study (N=11). *Scandinavian Journal of Pain*. 2018;18 (Supplement 1):S6.

### **3. Not patients with chronic pain or their carer (n=19)**

1. Grinberg K. Factors affecting the population's opinions regarding cannabis treatment for chronic pain patients. *Pain Practice*. 2018;18 (Supplement 1):61.
2. Iskedjian M, Desjardins O, Piwko C, Bereza B, Jaszewski B, Einarson TR. Willingness to pay for a treatment for pain in multiple sclerosis. *Pharmacoeconomics*. 2009;27:149-58.
3. Grotenhermen F, Muller-Vahl K. IACM 2nd Conference on Cannabinoids in Medicine. *Expert Opinion on Pharmacotherapy*. 2003;4:2367-71.
4. Lau N, Sales P, Averill S, Murphy F, Sato SO, Murphy S. A safer alternative: Cannabis substitution as harm reduction. *Drug Alcohol Rev*. 2015;34:654-9.
5. Ishida JH, Wong PO, Cohen BE, Vali M, Steigerwald S, Keyhani S. Substitution of marijuana for opioids in a national survey of US adults. *PloS one*. 2019;14 (10) (no pagination).

6. Lucas P, Baron EP, Jikomes N. Medical cannabis patterns of use and substitution for opioids & other pharmaceutical drugs, alcohol, tobacco, and illicit substances; Results from a cross-sectional survey of authorized patients. *Harm Reduction Journal*. 2019;16 (1) (no pagination).
7. Wan BA, Diaz P, Blake A, Chan S, Wolt A, Zaki P, et al. Efficacy of different varieties of medical cannabis in relieving symptoms. *Journal of Pain Management*. 2017;10:375-83.
8. Mendoza K, McPherson ML. Are we "In the Weeds"? What hospice providers want to know about medical cannabis. *Postgraduate Medicine*. 2016;128 (Supplement 2):60.
9. Mendoza KS, McPherson ML. Knowledge, Skills, and Attitudes Regarding the Use of Medical Cannabis in the Hospice Population: An Educational Intervention. *Am J Hosp Palliat Care*. 2018;35:759-66.
10. Schenker Y, Merlin JS, Quill T. In reply. *JAMA - Journal of the American Medical Association*. 2019;321:512.
11. Sharon H, Goldway N, Goor-Aryeh I, Eisenberg E, Brill S. Personal experience and attitudes of pain medicine specialists in Israel regarding the medical use of cannabis for chronic pain. *Journal of pain research*. 2018;11:1411-9.
12. St-Amant H, Ware MA, Julien N, Lacasse A. Prevalence and determinants of cannabinoid prescription for the management of chronic noncancer pain: a postal survey of physicians in the Abitibi-Temiscamingue region of Quebec. *CMAJ Open*. 2015;3:E251-7.
13. Starrels JL, Young S, Azari S, Edelman EJ, Pomeranz J, Roy PJ, et al. Experts disagree about marijuana use among patients on opioids for chronic pain. *Journal of General Internal Medicine*. 2018;33 (2 Supplement 1):190.
14. Starrels JL, Young SR, Azari SS, Becker WC, Jennifer Edelman E, Liebschutz JM, et al. Disagreement and Uncertainty Among Experts About how to Respond to Marijuana Use in Patients on Long-term Opioids for Chronic Pain: Results of a Delphi Study. *Pain Medicine*. 2020;21:247-54.
15. Zolotov Y, Sznitman S, Vulfsons S. Validation of Clinical Vignettes to Explore Medical Cannabis Practices. *Isr Med Assoc J*. 2019;21:710-5.
16. Zolotov Y, Vulfsons S, Sznitman S. Predicting Physicians' Intentions to Recommend Medical Cannabis. *J Pain Symptom Manage*. 2019;58:400-7.
17. Nouryan C, Martins-Welch D, Kline M, Modayil S, Dauber M, Akerman M, et al. Health providers' perspectives on medical marijuana use. *Journal of Palliative Medicine*. 2018;21 (5):A27.
18. Boehnke KF, Scott JR, Litinas E, Sisley S, Williams DA, Clauw DJ. Pills to Pot: Observational Analyses of Cannabis Substitution Among Medical Cannabis Users With Chronic Pain. *Journal of Pain*. 2019;20:830-41.

19. Khelemsky Y, Goldberg AT, Hurd YL, Winkel G, Ninh A, Qian L, et al. Perioperative Patient Beliefs Regarding Potential Effectiveness of Marijuana (Cannabinoids) for Treatment of Pain: A Prospective Population Survey. *Reg Anesth Pain Med*. 2017;42:652-9.

#### **4. Not cannabis (n=3)**

1. Vargas-Schaffer G. Drugs able to prevent chronic pain. *Techniques in Regional Anesthesia and Pain Management*. 2014;18:92-9.
2. Manchikanti L, Atluri S, Trescot AM, Giordano J. Monitoring opioid adherence in chronic pain patients: Tools, techniques, and utility. *Pain Physician*. 2008;11:S155-S80.
3. Mijatovic D, Lapin B, Davin S, Rispinto S. Psychosocial risk factors for predicting patient dropout of an interdisciplinary pain program: A retrospective analysis. *Pain Medicine (United States)*\_1. 2019;20 (3):647-8.

#### **5. Personal experience (case study) (n=2)**

1. Friedberg J. Medical cannabis: Four patient perspectives. *Journal of Pain Management*. 2016;9:517-9.
2. Greenberg L. "Oh, the Times They Are a Changin'": Reflections on Personal Experiences with Medical Cannabis Therapy. *Cannabis and Cannabinoid Research*. 2019;4:75-6.

#### **6. Value and preference data not elicited from patients or their carers (n=1)**

1. Burke J. Drug diversion and abuse: Medical marijuana: Miracle or scam? *Pharmacy Times*. 2010;76.

**Appendix 7 Risk of bias assessments for quantitative studies**

| <b>Study ID (Reference number)</b> | <b>Was the study sample selected in a manner to ensure the representativeness to the target population?</b> | <b>Was the attrition sufficiently low to minimize the risk of bias?</b> | <b>Was the choice of the methodology appropriate for addressing the study aim?</b> | <b>Was the instrument (or tools that was used to elicit values and preferences, e.g. questionnaire) administered in the intended way?</b> | <b>Was a valid representation of the outcome/health state (e.g. a state of pain relief - a beneficial outcome of medical cannabis, or an experience of coughing - a harmful outcome of medical cannabis) utilized?</b> | <b>Did the researchers check the understanding to the measurement techniques (e.g. questionnaire in a survey)?</b> | <b>Were the results analyzed appropriately?</b> | <b>Overall risk of bias</b> |
|------------------------------------|-------------------------------------------------------------------------------------------------------------|-------------------------------------------------------------------------|------------------------------------------------------------------------------------|-------------------------------------------------------------------------------------------------------------------------------------------|------------------------------------------------------------------------------------------------------------------------------------------------------------------------------------------------------------------------|--------------------------------------------------------------------------------------------------------------------|-------------------------------------------------|-----------------------------|
| Boehnke 2019 (21)                  | Probably yes                                                                                                | Probably yes                                                            | Probably yes                                                                       | Yes                                                                                                                                       | NA                                                                                                                                                                                                                     | Probably yes                                                                                                       | Yes                                             | Moderate                    |
| Degenhardt 2015 (24)               | Probably yes                                                                                                | Yes                                                                     | Yes                                                                                | Yes                                                                                                                                       | NA                                                                                                                                                                                                                     | Probably yes                                                                                                       | Yes                                             | Moderate                    |
| Heng 2018 (27)                     | Probably yes                                                                                                | Yes                                                                     | Probably yes                                                                       | Yes                                                                                                                                       | NA                                                                                                                                                                                                                     | Probably yes                                                                                                       | Yes                                             | Moderate                    |
| Gill 2001 (26)                     | Probably yes                                                                                                | Yes                                                                     | Yes                                                                                | Probably yes                                                                                                                              | Probably no                                                                                                                                                                                                            | Probably yes                                                                                                       | Probably yes                                    | Serious                     |
| Gallagher 2003 (25)                | Probably yes                                                                                                | Probably no                                                             | Yes                                                                                | Yes                                                                                                                                       | Probably no                                                                                                                                                                                                            | Probably no                                                                                                        | Probably no                                     | Critical                    |
| Piper BJ 2017 (35)                 | Yes                                                                                                         | Probably no                                                             | Yes                                                                                | Yes                                                                                                                                       | NA                                                                                                                                                                                                                     | Yes                                                                                                                | yes                                             | Serious                     |
| Sexton 2016 (30)                   | Yes                                                                                                         | Probably yes                                                            | Yes                                                                                | Yes                                                                                                                                       | NA                                                                                                                                                                                                                     | Yes                                                                                                                | Yes                                             | Moderate                    |
| Zarrabi 2020, Singh 2019 (31, 34)  | Probably yes                                                                                                | Probably yes                                                            | Yes                                                                                | Yes                                                                                                                                       | Probably no                                                                                                                                                                                                            | Probably no                                                                                                        | Yes                                             | Serious                     |
| Notcutt 2004 (33)                  | Probably yes                                                                                                | Probably Yes                                                            | Probably yes                                                                       | Probably yes                                                                                                                              | NA                                                                                                                                                                                                                     | Probably yes                                                                                                       | Probably yes                                    | Moderate                    |
| Rochford 2019 (29)                 | Probably no                                                                                                 | Probably yes                                                            | Probably yes                                                                       | Probably yes                                                                                                                              | NA                                                                                                                                                                                                                     | Probably yes                                                                                                       | Probably yes                                    | Serious                     |

**Appendix 8 Methodological limitations assessments for qualitative studies**

| Study ID (Reference number) | Was there a clear statement of the aims of the research? | Is a qualitative methodology appropriate? | Was the research design appropriate to address the aims of the research? | Was the recruitment strategy appropriate to the aims of the research? | Was the data collected in a way that addressed the research issue? | Has the relationship between researcher and participants been adequately considered? | Have ethical issues been taken into consideration? | Was the data analysis sufficiently rigorous? | Is there a clear statement of findings? | How valuable is the research? | Overall methodological limitations |
|-----------------------------|----------------------------------------------------------|-------------------------------------------|--------------------------------------------------------------------------|-----------------------------------------------------------------------|--------------------------------------------------------------------|--------------------------------------------------------------------------------------|----------------------------------------------------|----------------------------------------------|-----------------------------------------|-------------------------------|------------------------------------|
| Bruce 2018 (22)             | Yes                                                      | Yes                                       | Yes                                                                      | Can't tell                                                            | Yes                                                                | No                                                                                   | Yes                                                | Yes                                          | Yes                                     | Yes                           | No or minor                        |
| Cooke 2019 (23)             | Yes                                                      | Yes                                       | Yes                                                                      | Can't tell                                                            | Yes                                                                | No                                                                                   | Can't tell                                         | Yes                                          | No                                      | Yes                           | Moderate                           |
| Bigand 2019 (20)            | Yes                                                      | Yes                                       | No                                                                       | Can't tell                                                            | No                                                                 | No                                                                                   | Yes                                                | Yes                                          | Yes                                     | Yes                           | Serious                            |
| Lavie-Ajayi 2019 (28)       | Yes                                                      | Yes                                       | Yes                                                                      | Yes                                                                   | Yes                                                                | No                                                                                   | Can't tell                                         | Yes                                          | Yes                                     | Yes                           | No or minor                        |
| Satterlund 2015 (32)        | Yes                                                      | Yes                                       | Yes                                                                      | Can't tell                                                            | Yes                                                                | No                                                                                   | Yes                                                | Yes                                          | Yes                                     | Yes                           | Moderate                           |

## Appendix 9 Evidence profile for review findings

| Review finding                                                               | Explanation                                                                                                                                                                                                                                                                                                                                                                                                                                                                                                                                                                                           | Certainty assessment with GRADE/ GRADE CERQual |                               |                                          |                          |                         |                       |                           | Certainty |
|------------------------------------------------------------------------------|-------------------------------------------------------------------------------------------------------------------------------------------------------------------------------------------------------------------------------------------------------------------------------------------------------------------------------------------------------------------------------------------------------------------------------------------------------------------------------------------------------------------------------------------------------------------------------------------------------|------------------------------------------------|-------------------------------|------------------------------------------|--------------------------|-------------------------|-----------------------|---------------------------|-----------|
|                                                                              |                                                                                                                                                                                                                                                                                                                                                                                                                                                                                                                                                                                                       | Study design (Reference number)                | NO. of studies (participants) | Risk of bias/ Methodological limitations | Inconsistency/ Coherence | Indirectness/ Relevance | Imprecision/ Adequacy | Small effect bias         |           |
| <b>1. Values and preferences towards medical cannabis</b>                    |                                                                                                                                                                                                                                                                                                                                                                                                                                                                                                                                                                                                       |                                                |                               |                                          |                          |                         |                       |                           |           |
| <b>1.1 Use of medical cannabis for chronic pain</b>                          |                                                                                                                                                                                                                                                                                                                                                                                                                                                                                                                                                                                                       |                                                |                               |                                          |                          |                         |                       |                           |           |
| Patients had mixed levels of comfort or willingness to use medical cannabis. | [Quantitative]<br>Most patients with advanced life-limiting illnesses were comfortable using cannabis for chronic pain and nausea (25), while other non-palliative patients with chronic pain were unwilling or ambivalent about medical cannabis use (26). Non-White patients with advanced illness were more concerned about medical cannabis compared to White patients, but they remained comfortable using medical cannabis (25). Chronic pain patients who use both medical cannabis and other prescription medications believed that medical cannabis was effective for managing [Qualitative] | Quantitative (25,26,27)                        | 3 (633)                       | Serious risk                             | Not serious              | Serious                 | Not serious           | Not serious               | Low       |
|                                                                              | Patients with a range of chronic medical conditions believed that medical cannabis was effective for pain (22).                                                                                                                                                                                                                                                                                                                                                                                                                                                                                       | Qualitative (22)                               | 1 (30)                        | No or very minor concerns                | NA                       | Minor concerns          | Serious concerns      | No or very minor concerns | Low       |

|                                                                                                |                                                                                                                                                                                                                                                                                                                                                                                                                |                               |         |                           |             |                           |                  |                           |          |
|------------------------------------------------------------------------------------------------|----------------------------------------------------------------------------------------------------------------------------------------------------------------------------------------------------------------------------------------------------------------------------------------------------------------------------------------------------------------------------------------------------------------|-------------------------------|---------|---------------------------|-------------|---------------------------|------------------|---------------------------|----------|
| Most patients who use medical cannabis had a positive attitude toward its use for pain relief. | [Quantitative]<br>Those using medical cannabis during their recovery believed that it reduced pain (25). Most individuals expressed positive aspects of medical cannabis use, such as pain reduction (27, 31, 34). The majority of participants with cancer in one study reported using cannabis products for a “cancer cure” (31). Some believed that cannabis should be legalized for medical purposes (29). | Quantitative (25,27,29,31,34) | 4 (765) | Serious risk              | Not serious | Serious                   | Not serious      | Not serious               | Low      |
|                                                                                                | [Qualitative]<br>Most individuals expressed use of medical cannabis for chronic pain was associated with a range of improved outcomes (e.g. better function, sleep, life changing etc.) (28).                                                                                                                                                                                                                  | Qualitative (28)              | 1 (19)  | No or very minor concerns | NA          | No or very minor concerns | Serious concerns | No or very minor concerns | Moderate |

### 1.2 Medical cannabis over other pain medicines

|                                                                                                              |                                                                                                                                                   |                  |        |                           |    |                |                  |                           |     |
|--------------------------------------------------------------------------------------------------------------|---------------------------------------------------------------------------------------------------------------------------------------------------|------------------|--------|---------------------------|----|----------------|------------------|---------------------------|-----|
| Patients with chronic pain and substance use histories preferred medical cannabis over prescription opioids. | [Qualitative]<br>Patients with chronic pain and substance use histories preferred medical cannabis over prescription opioids to manage pain (23). | Qualitative (23) | 1 (46) | No or very minor concerns | NA | Minor concerns | Serious concerns | No or very minor concerns | Low |
|--------------------------------------------------------------------------------------------------------------|---------------------------------------------------------------------------------------------------------------------------------------------------|------------------|--------|---------------------------|----|----------------|------------------|---------------------------|-----|



|                                                                                                    |                                                                                                                                                                                                                                                                                                                                                                                |                   |        |              |             |         |         |             |          |
|----------------------------------------------------------------------------------------------------|--------------------------------------------------------------------------------------------------------------------------------------------------------------------------------------------------------------------------------------------------------------------------------------------------------------------------------------------------------------------------------|-------------------|--------|--------------|-------------|---------|---------|-------------|----------|
| Some patients believed that medical cannabis is safer than morphine and other strong pain killers. | [Quantitative]<br>Some participants believed that because cannabis is a 'natural' product, it is safer than morphine and other strong pain killers (25). Non-Christians were more likely to believe that cannabis is safer than morphine (25). Those with high school education or less, were significantly less likely to believe that cannabis was safer than morphine (25). | Quantitative (25) | 1 (68) | Very serious | Not serious | Serious | Serious | Not serious | Very low |
|----------------------------------------------------------------------------------------------------|--------------------------------------------------------------------------------------------------------------------------------------------------------------------------------------------------------------------------------------------------------------------------------------------------------------------------------------------------------------------------------|-------------------|--------|--------------|-------------|---------|---------|-------------|----------|

### 1.3 Different preparations of medical cannabis

#### ***Cannabis variety (i.e. sativa, indica, hybrid)***

|                                                                                                                                 |                                                                                                                                                                                                                                                                                                                                                                                     |                   |          |              |             |             |             |             |          |
|---------------------------------------------------------------------------------------------------------------------------------|-------------------------------------------------------------------------------------------------------------------------------------------------------------------------------------------------------------------------------------------------------------------------------------------------------------------------------------------------------------------------------------|-------------------|----------|--------------|-------------|-------------|-------------|-------------|----------|
| Most patients preferred medical cannabis with a blend of indica and sativa, regardless of gender, reasons for use, and cannabis | [Quantitative]<br>Most patients preferred using a blend of indica and sativa to manage chronic pain, followed by indica alone and sativa alone. There were no differences in cannabis variety preferences between males and females, those who use cannabis for medical purposes only and those who use for medical and recreational purposes, or novice and experienced users.(21) | Quantitative (21) | 1 (1321) | Serious risk | Not serious | Not serious | Not serious | Not serious | Moderate |
|---------------------------------------------------------------------------------------------------------------------------------|-------------------------------------------------------------------------------------------------------------------------------------------------------------------------------------------------------------------------------------------------------------------------------------------------------------------------------------------------------------------------------------|-------------------|----------|--------------|-------------|-------------|-------------|-------------|----------|

#### ***Cannabis content (i.e. THC or CBD potency, ratio of THC and CBD)***

|                                                                                                                                                                        |                                                                                                                                                                                                                                                                                                                                                                                                                                                                                                                                                                                                  |                       |          |              |             |             |             |             |          |
|------------------------------------------------------------------------------------------------------------------------------------------------------------------------|--------------------------------------------------------------------------------------------------------------------------------------------------------------------------------------------------------------------------------------------------------------------------------------------------------------------------------------------------------------------------------------------------------------------------------------------------------------------------------------------------------------------------------------------------------------------------------------------------|-----------------------|----------|--------------|-------------|-------------|-------------|-------------|----------|
| High THC and high CBD is the most preferred preparation, but gender, reason for use, and cannabis experience level influenced patients' preference for cannabis ratio. | [Quantitative] Females preferred low THC: high CBD, while males preferred equal ratios of THC: CBD. (21) Patients who use cannabis for medical purposes reported a greater preference for products with low THC: high CBD compared to individuals who use cannabis both medically and recreationally. (21) Both novice and experienced cannabis users preferred high CBD products most, and more novice users prefer low THC: high CBD while experienced users preferred high THC: high CBD.(21) Almost none preferred high THC and low CBD, low THC and low CBD, only CBD, or only THC.(21, 33) | Quantitative (21, 33) | 2 (1355) | Serious risk | Not serious | Not serious | Not serious | Not serious | Moderate |
|------------------------------------------------------------------------------------------------------------------------------------------------------------------------|--------------------------------------------------------------------------------------------------------------------------------------------------------------------------------------------------------------------------------------------------------------------------------------------------------------------------------------------------------------------------------------------------------------------------------------------------------------------------------------------------------------------------------------------------------------------------------------------------|-----------------------|----------|--------------|-------------|-------------|-------------|-------------|----------|

### ***Cannabis administration route***

|                                                                                                                     |                                                                                                                                                                                                                                                                                                                                                                |                                  |          |              |             |             |             |             |          |
|---------------------------------------------------------------------------------------------------------------------|----------------------------------------------------------------------------------------------------------------------------------------------------------------------------------------------------------------------------------------------------------------------------------------------------------------------------------------------------------------|----------------------------------|----------|--------------|-------------|-------------|-------------|-------------|----------|
| Gender, reason for use and cannabis experience level influenced patients' preferred cannabis administration routes. | [Quantitative]<br>Females patients preferred to use tincture and topical preparations and less preferred to use vaporizing and smoking preparations compared with males. (21)                                                                                                                                                                                  | Quantitative (21),<br>Mixed (35) | 2 (2305) | Serious risk | Not serious | Not serious | Not serious | Not serious | Moderate |
|                                                                                                                     | Patients who used cannabis both recreationally and medically preferred smoking and vaporizing, while those who used cannabis medically only preferred smoking, vaporizing, tinctures, and edibles. (21)                                                                                                                                                        |                                  |          |              |             |             |             |             |          |
|                                                                                                                     | Experienced cannabis users preferred multiple administration routes compared with novice users. Smoking, vaporizing, and edibles were the most common preferred administration routes among both experience and novice users. (21)                                                                                                                             |                                  |          |              |             |             |             |             |          |
|                                                                                                                     | [Mixed]<br>Among chronic pain patients who are legal members of medical cannabis dispensaries, a minority of participants preferred using a joint, pipe, or bong, while some preferred vaporizers, edibles, or tinctures; very few preferred concentrates or topicals. In addition, very few participants reported unpleasant routes of administration as what |                                  |          |              |             |             |             |             |          |

|                                                                                                      |                                                                                                                                                                                                                        |                   |        |              |             |             |         |             |     |
|------------------------------------------------------------------------------------------------------|------------------------------------------------------------------------------------------------------------------------------------------------------------------------------------------------------------------------|-------------------|--------|--------------|-------------|-------------|---------|-------------|-----|
| Most patients who have an advanced life-limiting illness preferred an oral form of medical cannabis. | [Quantitative]<br>Most patients who have an advanced life-limiting illness stated preference for an oral form (pill, droplets under the tongue, or droplets added to food) and only a minority preferred smoking. (25) | Quantitative (25) | 1 (68) | Very serious | Not serious | Not serious | Serious | Not serious | Low |
|------------------------------------------------------------------------------------------------------|------------------------------------------------------------------------------------------------------------------------------------------------------------------------------------------------------------------------|-------------------|--------|--------------|-------------|-------------|---------|-------------|-----|

## 2. Factors that influenced patient's decision regarding use of medical cannabis

### 2.1 Factors influenced the choice of medical cannabis use

|                                                                                                                                                      |                                                                                                                                                                                                                                                                                                                                                                                                                                           |            |        |              |             |             |             |             |          |
|------------------------------------------------------------------------------------------------------------------------------------------------------|-------------------------------------------------------------------------------------------------------------------------------------------------------------------------------------------------------------------------------------------------------------------------------------------------------------------------------------------------------------------------------------------------------------------------------------------|------------|--------|--------------|-------------|-------------|-------------|-------------|----------|
| Most patients used medical cannabis because it improved the management of symptoms associated with pain, mental health and other medical conditions. | [Mixed]<br>Some patients who were legal members of medical cannabis dispensaries preferred aspects of medical cannabis related to health and well-being, including pain relief, sleep benefits, limited addiction potential, improved quality of life, functionality, and relaxation, while others preferred general aspects of medical cannabis, like general improvement in the quality of life, functionality, cognitive aspects (35). | Mixed (35) | 1(984) | Serious risk | Not serious | Not serious | Not serious | Not serious | Moderate |
|------------------------------------------------------------------------------------------------------------------------------------------------------|-------------------------------------------------------------------------------------------------------------------------------------------------------------------------------------------------------------------------------------------------------------------------------------------------------------------------------------------------------------------------------------------------------------------------------------------|------------|--------|--------------|-------------|-------------|-------------|-------------|----------|

|                                                                                                                                                                                                                                                                                                                                                                                                                                                                                                                                                                                                                                                                                                                               |                                     |                |                       |                                  |                                  |                                  |                                  |             |
|-------------------------------------------------------------------------------------------------------------------------------------------------------------------------------------------------------------------------------------------------------------------------------------------------------------------------------------------------------------------------------------------------------------------------------------------------------------------------------------------------------------------------------------------------------------------------------------------------------------------------------------------------------------------------------------------------------------------------------|-------------------------------------|----------------|-----------------------|----------------------------------|----------------------------------|----------------------------------|----------------------------------|-------------|
| <p>[Qualitative]</p> <p>Patients viewed medical cannabis as an effective approach to managing symptoms with or without other medications (20, 22, 23), including pain (20, 22, 23), disrupted sleep, poor appetite, and nausea (20). Patients reported that cannabis improved emotional and mental well-being by reducing anxiety, depression and stress (20). Patients also reported that cannabis allowed them to sleep, focus and function (28). Most patients reported that cannabis facilitated a state of relaxation in which pain could be dealt with in a more tolerable form (28).</p> <p>However, patients found that medical cannabis use sometimes made it difficult to manage their medication regimen (23).</p> | <p>Qualitative (20, 22, 23, 28)</p> | <p>4 (245)</p> | <p>Minor concerns</p> | <p>No or very minor concerns</p> | <p>High</p> |
|-------------------------------------------------------------------------------------------------------------------------------------------------------------------------------------------------------------------------------------------------------------------------------------------------------------------------------------------------------------------------------------------------------------------------------------------------------------------------------------------------------------------------------------------------------------------------------------------------------------------------------------------------------------------------------------------------------------------------------|-------------------------------------|----------------|-----------------------|----------------------------------|----------------------------------|----------------------------------|----------------------------------|-------------|

|                                                                                                |                                                                                                                                                                                                                                                                              |                   |         |              |             |             |             |             |          |
|------------------------------------------------------------------------------------------------|------------------------------------------------------------------------------------------------------------------------------------------------------------------------------------------------------------------------------------------------------------------------------|-------------------|---------|--------------|-------------|-------------|-------------|-------------|----------|
| Most patients were motivated to use medical cannabis to reduce other prescription medications. | [Quantitative]<br>Chronic pain patients who used both medical cannabis and prescription medications believed that medical cannabis was effective for pain relief and were motivated to use medical cannabis to decrease the amount of prescribed medications they used (27). | Quantitative (27) | 1 (500) | Serious risk | Not serious | Not serious | Not serious | Not serious | Moderate |
|------------------------------------------------------------------------------------------------|------------------------------------------------------------------------------------------------------------------------------------------------------------------------------------------------------------------------------------------------------------------------------|-------------------|---------|--------------|-------------|-------------|-------------|-------------|----------|

|                                                                                                                                                                                                                                            |                  |        |                           |    |                           |                   |                           |          |
|--------------------------------------------------------------------------------------------------------------------------------------------------------------------------------------------------------------------------------------------|------------------|--------|---------------------------|----|---------------------------|-------------------|---------------------------|----------|
| [Qualitative]<br>Patients with a range of chronic medical conditions (22) believed that medical cannabis managed pain symptoms and were motivated to use medical cannabis to decrease the amount of prescribed medications they used (22). | Qualitative (22) | 1 (30) | No or very minor concerns | NA | No or very minor concerns | Moderate concerns | No or very minor concerns | Moderate |
|--------------------------------------------------------------------------------------------------------------------------------------------------------------------------------------------------------------------------------------------|------------------|--------|---------------------------|----|---------------------------|-------------------|---------------------------|----------|

|                                                                                                                                                            |                                                                                                                                                                                                                                                                                                                                                  |                            |          |              |             |             |             |             |          |
|------------------------------------------------------------------------------------------------------------------------------------------------------------|--------------------------------------------------------------------------------------------------------------------------------------------------------------------------------------------------------------------------------------------------------------------------------------------------------------------------------------------------|----------------------------|----------|--------------|-------------|-------------|-------------|-------------|----------|
| The majority of patients expressed that their cannabis use was influenced by positive social consequences, such as social support from friends and family. | [Quantitative]<br>A majority of patients agreed that cannabis for medical use would not cause disagreements or relationship problems with their loved ones (25). Most participants reported that their family members were supportive of their use, and the majority reported that their medical providers were supportive of their use (31,34). | Quantitative<br>(25,31,34) | 2 (2104) | Serious risk | Not serious | Not serious | Not serious | Not serious | Moderate |
|------------------------------------------------------------------------------------------------------------------------------------------------------------|--------------------------------------------------------------------------------------------------------------------------------------------------------------------------------------------------------------------------------------------------------------------------------------------------------------------------------------------------|----------------------------|----------|--------------|-------------|-------------|-------------|-------------|----------|



|                                                                                                                               |                                                                                                                                                                                                                                                                                                                                                                                                                                                                                                                                                                                                                                                                                                                                                                                                                                                                                                                                                                                                                                                                                                                                                                                                                                                                                                                           |                                           |         |              |             |             |             |             |          |
|-------------------------------------------------------------------------------------------------------------------------------|---------------------------------------------------------------------------------------------------------------------------------------------------------------------------------------------------------------------------------------------------------------------------------------------------------------------------------------------------------------------------------------------------------------------------------------------------------------------------------------------------------------------------------------------------------------------------------------------------------------------------------------------------------------------------------------------------------------------------------------------------------------------------------------------------------------------------------------------------------------------------------------------------------------------------------------------------------------------------------------------------------------------------------------------------------------------------------------------------------------------------------------------------------------------------------------------------------------------------------------------------------------------------------------------------------------------------|-------------------------------------------|---------|--------------|-------------|-------------|-------------|-------------|----------|
| Most patients expressed concerns with using cannabis when describing a range of adverse effects from use of medical cannabis. | <p>[Quantitative]</p> <p>Concerns about medical cannabis included concerns about side effects, addiction, tolerance, losing control or acting strangely, and were related to unwillingness to use cannabis (27). Patients who used cannabis to manage their pain had greater feelings of anxiety, and increased catastrophic thinking (26). Among those who were unwilling to use cannabis, increased age was related to more concerns about medical cannabis, including concerns of losing control (26). Increased age also impacted beliefs that cannabis was a useful medication to treat pain (27). Some patients reported that they were concerned about unpleasant physical or emotional symptoms suggestive of withdrawal after stopping medical cannabis use (31 , 34). Some patients were concerned about mental or physical dependence to medical cannabis; however, most did not perceive themselves as addicted to medical cannabis (31 , 34). Concerns about addiction were associated with unwillingness to use medical cannabis (26).</p> <p>[Mixed]</p> <p>Some patients who were legal members of medical cannabis dispensaries reported adverse physical, cognitive, and emotional effects of medical cannabis, as well as people’s negative and stigmatizing values towards medical cannabis (35).</p> | Quantitative (26, 27, 31, 34), Mixed (35) | 4(1650) | Serious risk | Not serious | Not serious | Not serious | Not serious | Moderate |
|-------------------------------------------------------------------------------------------------------------------------------|---------------------------------------------------------------------------------------------------------------------------------------------------------------------------------------------------------------------------------------------------------------------------------------------------------------------------------------------------------------------------------------------------------------------------------------------------------------------------------------------------------------------------------------------------------------------------------------------------------------------------------------------------------------------------------------------------------------------------------------------------------------------------------------------------------------------------------------------------------------------------------------------------------------------------------------------------------------------------------------------------------------------------------------------------------------------------------------------------------------------------------------------------------------------------------------------------------------------------------------------------------------------------------------------------------------------------|-------------------------------------------|---------|--------------|-------------|-------------|-------------|-------------|----------|

|                                                                                                                                                                                                                                                                                                                                                                                                                                                                                                                                                                                                                       |                      |         |                   |                           |                           |                |                           |          |
|-----------------------------------------------------------------------------------------------------------------------------------------------------------------------------------------------------------------------------------------------------------------------------------------------------------------------------------------------------------------------------------------------------------------------------------------------------------------------------------------------------------------------------------------------------------------------------------------------------------------------|----------------------|---------|-------------------|---------------------------|---------------------------|----------------|---------------------------|----------|
| <p>[Qualitative]<br/> Patients commonly reported lack of concentration, poor memory and sleepiness as consequences of medical cannabis use. Participants also reported minor consequence which included eating too much, coughing, and weight gain. Seizures and anaphylaxis from an allergic reaction were described as severe consequences from use (20).</p> <p>Some patients were concerned that, while medical cannabis helped with pain management, it might lead addiction (23). Patients with a history of addiction were concerned that medical cannabis use could pose a threat to their sobriety (23).</p> | Qualitative (20, 23) | 2 (196) | Moderate concerns | No or very minor concerns | No or very minor concerns | Minor concerns | No or very minor concerns | Moderate |
|-----------------------------------------------------------------------------------------------------------------------------------------------------------------------------------------------------------------------------------------------------------------------------------------------------------------------------------------------------------------------------------------------------------------------------------------------------------------------------------------------------------------------------------------------------------------------------------------------------------------------|----------------------|---------|-------------------|---------------------------|---------------------------|----------------|---------------------------|----------|

|                                                                                                                 |                                                                                                                                                                                                                                                                                                                                                                                                                                                                                                                                                                                                             |                                         |          |              |             |             |             |             |          |
|-----------------------------------------------------------------------------------------------------------------|-------------------------------------------------------------------------------------------------------------------------------------------------------------------------------------------------------------------------------------------------------------------------------------------------------------------------------------------------------------------------------------------------------------------------------------------------------------------------------------------------------------------------------------------------------------------------------------------------------------|-----------------------------------------|----------|--------------|-------------|-------------|-------------|-------------|----------|
| Most patients expressed that their cannabis use was influenced by negative social consequences, such as stigma. | [Quantitative] Patients who were comfortable with their cannabis use for pain had a significant concern over the use of cannabis leading to relationship problems or disagreements with loved ones (25). Some patients agreed that medical cannabis would make them vulnerable to attack and theft by substance abusers. A minority of patients agreed that medical cannabis would cause problems with the law, and that they may be arrested or charged with possession of cannabis (25). Some patients expressed concerns about others' opinions towards their used of cannabis-related products (31,34). | Quantitative (25,26,31, 34), Mixed (35) | 4 (3153) | Serious risk | Not serious | Not serious | Not serious | Not serious | Moderate |
|-----------------------------------------------------------------------------------------------------------------|-------------------------------------------------------------------------------------------------------------------------------------------------------------------------------------------------------------------------------------------------------------------------------------------------------------------------------------------------------------------------------------------------------------------------------------------------------------------------------------------------------------------------------------------------------------------------------------------------------------|-----------------------------------------|----------|--------------|-------------|-------------|-------------|-------------|----------|

|                                                                                                                       |                                                                                                                                                                                                                                                                                                                                                                                                                                                                                                                                                                                                                                                  |                                  |          |                   |                           |                           |                |                           |          |
|-----------------------------------------------------------------------------------------------------------------------|--------------------------------------------------------------------------------------------------------------------------------------------------------------------------------------------------------------------------------------------------------------------------------------------------------------------------------------------------------------------------------------------------------------------------------------------------------------------------------------------------------------------------------------------------------------------------------------------------------------------------------------------------|----------------------------------|----------|-------------------|---------------------------|---------------------------|----------------|---------------------------|----------|
|                                                                                                                       | [Qualitative]<br>Commonly reported negative social consequences included judgment from others as a result of use and "stoner" or "pothead" stereotypes (20, 32). Some patients reported that stigma affected the way they asked healthcare providers about cannabis as a treatment option, the ability to seek out medical cannabis as a treatment option, the location at which they purchased cannabis, and their ability to use cannabis in public. Patients who reported these factors tended to take longer to seek out cannabis as a treatment option, conceal their use, and would not speak to healthcare providers about cannabis (32). | Qualitative (20, 32)             | 2 (168)  | Moderate concerns | No or very minor concerns | No or very minor concerns | Minor concerns | No or very minor concerns | Moderate |
| The cost, legal status, and accessibility of medical cannabis influenced patients' decisions to use medical cannabis. | [Quantitative]<br>Some patients were concerned about the cost of medical cannabis and some were concerned about the legal status and accessibility of medical cannabis (31). Some patients reported that they would use medical cannabis if they had access to it (24). When making decisions about medical cannabis, the majority of patients relied on information from doctors, followed by the internet and friends or family (31, 34).<br><br>[Mixed]<br>Some patients who were legal members of medical cannabis dispensaries were                                                                                                         | Quantitative (24,31), Mixed (35) | 3 (2599) | Serious risk      | Not serious               | Not serious               | Not serious    | Not serious               | Moderate |

|                                                                                                                                                                                                                                                                                                                                                                                                                                 |                      |         |                   |                           |                           |                |                           |          |
|---------------------------------------------------------------------------------------------------------------------------------------------------------------------------------------------------------------------------------------------------------------------------------------------------------------------------------------------------------------------------------------------------------------------------------|----------------------|---------|-------------------|---------------------------|---------------------------|----------------|---------------------------|----------|
| [Qualitative]                                                                                                                                                                                                                                                                                                                                                                                                                   | Qualitative (20, 23) | 2 (196) | Moderate concerns | No or very minor concerns | No or very minor concerns | Minor concerns | No or very minor concerns | Moderate |
| Some patients felt that the cost of medical cannabis was too high, potentially limiting their access (20), while some reported that the legalization of medical cannabis improved access and influenced their decisions to purchase medical cannabis for symptom relief (20). Other patients found changes in policies related to medical cannabis difficult to navigate and wanted assistance to access medical cannabis (23). |                      |         |                   |                           |                           |                |                           |          |

## 2.2 Factors influencing the choice of different preparations of medical cannabis

|                                                                                                                                                                                                                     |                                                                                                                                                                                                                                                                                                                                                                                                                                                                                                                                                                                                                                                                                                                                                                                                                                                                                                                                                                                                                         |                              |                 |                     |                    |                |                    |                    |            |
|---------------------------------------------------------------------------------------------------------------------------------------------------------------------------------------------------------------------|-------------------------------------------------------------------------------------------------------------------------------------------------------------------------------------------------------------------------------------------------------------------------------------------------------------------------------------------------------------------------------------------------------------------------------------------------------------------------------------------------------------------------------------------------------------------------------------------------------------------------------------------------------------------------------------------------------------------------------------------------------------------------------------------------------------------------------------------------------------------------------------------------------------------------------------------------------------------------------------------------------------------------|------------------------------|-----------------|---------------------|--------------------|----------------|--------------------|--------------------|------------|
| <p>Patients chose medical cannabis products mainly based on cannabinoid content, recommendations from dispensary employees, described effects and side effects, cannabis variety, smell, and flower appearance.</p> | <p>[Quantitative ]<br/>       Most patients selected medical cannabis products based on cannabinoid content (e.g. THC), recommendations from dispensary employees, described effects, and cannabis variety (i.e. indica vs. sativa). A minority of patients selected cannabis based on visual properties and smell, and some patients were guided by recommendations from a friend, or name of the product. Recommendations from a medical professional was the least common factor that patients would consider when selecting medical cannabis (21).<br/><br/>       When selecting medical cannabis products, patients consider the following factors: the most commonly factors were smell, delta 9-tetrahydrocannabinol (THC) content, hybrid indica/sativa species, indica species, how the flower looks (size, density of the flower, and/or trichome and shape, cannabidiol (CBD) content, and sativa species. Some patients reported varietal name as important factor for medical cannabis selection.(30)</p> | <p>Quantitative (21, 30)</p> | <p>2 (2750)</p> | <p>Serious risk</p> | <p>Not serious</p> | <p>Serious</p> | <p>Not serious</p> | <p>Not serious</p> | <p>Low</p> |
|---------------------------------------------------------------------------------------------------------------------------------------------------------------------------------------------------------------------|-------------------------------------------------------------------------------------------------------------------------------------------------------------------------------------------------------------------------------------------------------------------------------------------------------------------------------------------------------------------------------------------------------------------------------------------------------------------------------------------------------------------------------------------------------------------------------------------------------------------------------------------------------------------------------------------------------------------------------------------------------------------------------------------------------------------------------------------------------------------------------------------------------------------------------------------------------------------------------------------------------------------------|------------------------------|-----------------|---------------------|--------------------|----------------|--------------------|--------------------|------------|

|                                                                                                                                                                                                                                                                                                                                                                                                                                                                                                                       |                                |               |                                  |                          |                                  |                         |                                  |            |
|-----------------------------------------------------------------------------------------------------------------------------------------------------------------------------------------------------------------------------------------------------------------------------------------------------------------------------------------------------------------------------------------------------------------------------------------------------------------------------------------------------------------------|--------------------------------|---------------|----------------------------------|--------------------------|----------------------------------|-------------------------|----------------------------------|------------|
| <p>[Qualitative]<br/> One study reported that long lasting effect of medical cannabis positively influenced patients choice of medical cannabis product (22). Another two studies reported that patients' uncertain about how they could determine which species of cannabis might work best to manage their pain and side effects of medical cannabis (e.g. headaches, disorientation or the sensation of feeling "stoned," coughing) negatively influence patients choice of medical cannabis product (23, 28).</p> | <p>Qualitative (22, 23,28)</p> | <p>3 (95)</p> | <p>No or very minor concerns</p> | <p>Moderate concerns</p> | <p>No or very minor concerns</p> | <p>Serious concerns</p> | <p>No or very minor concerns</p> | <p>Low</p> |
|-----------------------------------------------------------------------------------------------------------------------------------------------------------------------------------------------------------------------------------------------------------------------------------------------------------------------------------------------------------------------------------------------------------------------------------------------------------------------------------------------------------------------|--------------------------------|---------------|----------------------------------|--------------------------|----------------------------------|-------------------------|----------------------------------|------------|

|                                                                                                                                  |                                                                                                                                                                                                                                                                                                                                                                                                                                                                                                                                                                                                                                                                                                                                                                                                                                                                                                                                                                                                                                                                                                                                                                                                                                                                                                                                                                                                                                                   |                   |          |              |             |             |             |             |          |
|----------------------------------------------------------------------------------------------------------------------------------|---------------------------------------------------------------------------------------------------------------------------------------------------------------------------------------------------------------------------------------------------------------------------------------------------------------------------------------------------------------------------------------------------------------------------------------------------------------------------------------------------------------------------------------------------------------------------------------------------------------------------------------------------------------------------------------------------------------------------------------------------------------------------------------------------------------------------------------------------------------------------------------------------------------------------------------------------------------------------------------------------------------------------------------------------------------------------------------------------------------------------------------------------------------------------------------------------------------------------------------------------------------------------------------------------------------------------------------------------------------------------------------------------------------------------------------------------|-------------------|----------|--------------|-------------|-------------|-------------|-------------|----------|
| Gender, reason for use, and level of use experience influenced the factors patients considered when selecting cannabis products. | <p>[Quantitative]</p> <p>Selection of cannabis product were influenced by gender, reason for use (e.g., medical only vs. medical and recreational), and cannabis experience level (e.g., novice vs. experienced). (21)</p> <p>A higher proportion of males selected cannabis products based on cannabinoid content (i.e. THC or CBD potency, ratio of THC and CBD), cannabis variety (i.e. indica or sativa), visual properties, and smell. A higher proportion of females consulted with a medical professional when choosing cannabis products. (21)</p> <p>Patients who use cannabis both medically and recreationally were more likely to select cannabis products based on THC or other cannabinoid content, cannabis variety, described effects, visual properties, smell, recommendation from friends, and the product name, while those who use cannabis medically were more likely use recommendations from dispensary employees or a medical professional. (21)</p> <p>Novice users were more likely to select a cannabis product based on dispensary recommendation consult with a medical professional than experienced users, while experienced users chose products based on nearly all other selection factors including smell, visual properties, described effects, cannabinoid content (i.e. THC or CBD potency, ratio of THC and CBD), cannabis variety (i.e. indica or sativa) and name of medical cannabis product (21).</p> | Quantitative (21) | 1 (1321) | Serious risk | Not serious | Not serious | Not serious | Not serious | Moderate |
|----------------------------------------------------------------------------------------------------------------------------------|---------------------------------------------------------------------------------------------------------------------------------------------------------------------------------------------------------------------------------------------------------------------------------------------------------------------------------------------------------------------------------------------------------------------------------------------------------------------------------------------------------------------------------------------------------------------------------------------------------------------------------------------------------------------------------------------------------------------------------------------------------------------------------------------------------------------------------------------------------------------------------------------------------------------------------------------------------------------------------------------------------------------------------------------------------------------------------------------------------------------------------------------------------------------------------------------------------------------------------------------------------------------------------------------------------------------------------------------------------------------------------------------------------------------------------------------------|-------------------|----------|--------------|-------------|-------------|-------------|-------------|----------|



Abbreviations: CBD = cannabidiol; THC = delta-9-tetrahydrocannabinol.
